# Supplementary material for: A multicomponent tetrazolo indole synthesis
Source: PubMed Central journal article supplement — Chem Commun (Camb). 2021 Jun 9;57(54):6652–5. doi: 10.1039/d1cc02384e (PMC8259579; doi:10.1039/d1cc02384e), 2021-06-09
Supplement: CC-057-D1CC02384E-s001.pdf [file CC-057-D1CC02384E-s001.pdf]

## A Multicomponent Tetrazolo Indole Synthesis

Xiaofang Lei, Panagiota Lampiri, Pravin Patil, Giasemi Angeli, Constantinos G. Neochoritis, Alexander Dömling

### Supporting information

#### *Table of contents*

|                                                                 |     |
|-----------------------------------------------------------------|-----|
| 1. General methods and materials .....                          | 2   |
| 2. Synthetic procedures and analytical data .....               | 3   |
| 3. Exemplary copies of NMR and MS data of novel compounds ..... | 38  |
| 4. Single crystal x-ray structure determination .....           | 151 |

## 1. General methods and materials

All the reagents and solvents were purchased from Sigma-Aldrich, AK Scientific, Fluorochem, Abcr GmbH, Acros and were used without further purification. Isocyanides were synthesized as previously described by us.<sup>[1]</sup> All microwave irradiation reactions were carried out in a Biotage Initiator™ Microwave Synthesizer. Thin layer chromatography was performed on Millipore precoated silica gel plates (0.20 mm thick, particle size 25 μm). Nuclear magnetic resonance spectra were recorded on Bruker Avance 500 spectrometers (<sup>1</sup>H NMR (500 MHz), <sup>13</sup>C NMR (126 MHz)). Chemical shifts for <sup>1</sup>H NMR were reported as δ values and coupling constants were in hertz (Hz). The following abbreviations were used for spin multiplicity: s = singlet, br s = broad singlet, d = doublet, t = triplet, q = quartet, quin = quintet, dd = double of doublets, ddd = double doublet of doublets, m = multiplet. Chemical shifts for <sup>13</sup>C NMR were reported in ppm relative to the solvent peak. Flash chromatography was performed on a Reveleris® X2 Flash Chromatography, using Grace® Reveleris Silica flash cartridges (12 grams). Mass spectra were measured on a Waters Investigator Supercritical Fluid Chromatograph with a 3100 MS Detector (ESI) using a solvent system of methanol and CO<sub>2</sub> on a Viridis silica gel column (4.6 x 250 mm, 5 μm particle size) or Viridis 2-ethyl pyridine column (4.6 x 250 mm, 5 μm particle size). High resolution mass spectra were recorded using a LTQ-Orbitrap-XL (Thermo) at a resolution of 60000@m/z400.

## 2. Synthetic procedures and analytical data

### General Procedure for the Ugi tetrazole reaction (UT-4CR)

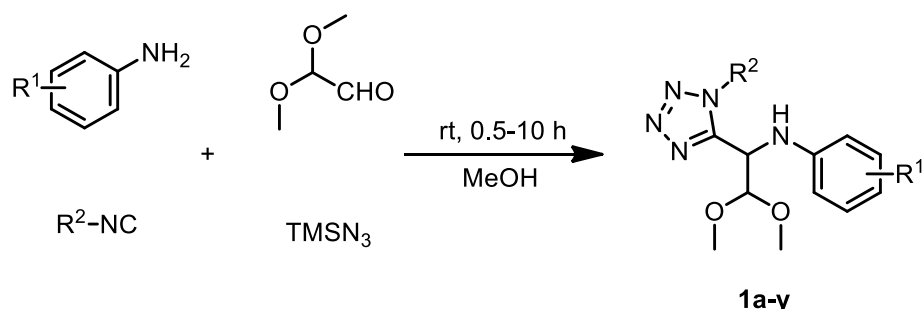

To a stirred solution of 2,2-dimethoxyacetaldehyde (2.0 mmol) in MeOH (2.0 mL), the corresponding aniline (2.0 mmol), isocyanide (2.0 mmol) and trimethylsilyl azide (2.0 mmol) were added. The reaction mixture was stirred vigorously for 2 h. Then, if solid appears, half of the solvent is removed under reduced pressure. The resulting solid was filtered and washed with Et<sub>2</sub>O. Alternatively, the solvent is removed under reduced pressure and the residue is purified by column chromatography (PE-EA, 2:1-1:1) to give the compounds **1a-y**.

### General Procedure for the Pictet-Spengler cyclization

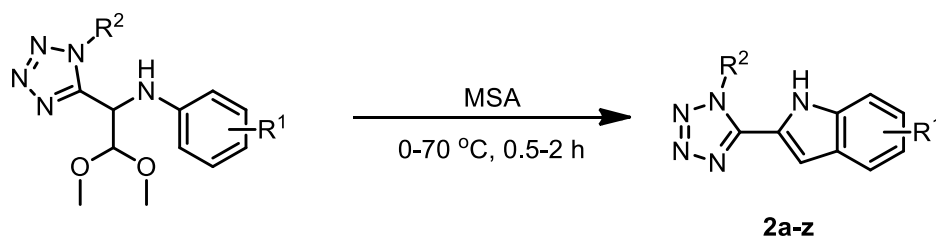

The corresponding tetrazole derivatives (1.0 mmol) are dissolved into methanesulfonic acid (MSA) (1.0 mL) at 0 °C and then heated up to 70 °C for 0.5 - 2.0 h. Then, the reaction mixture was cooled to room temperature and neutralized with an aqueous solution of NaHCO<sub>3</sub>, followed by extractions with ethyl acetate. The organic layer was dried with MgSO<sub>4</sub> and the solvent was removed under reduced pressure. If solid appears, the resulting solid was filtered and washed with Et<sub>2</sub>O. Alternatively, the solvent is removed under reduced pressure and the residue is purified by column chromatography (PE-EA, 3:1-1:1) to give the compounds **2a-z**.

*In case of meta-substituted anilines, mixture of isomers was obtained (see analytical data)*

## The gram-scale synthesis of **1a** and **2a**

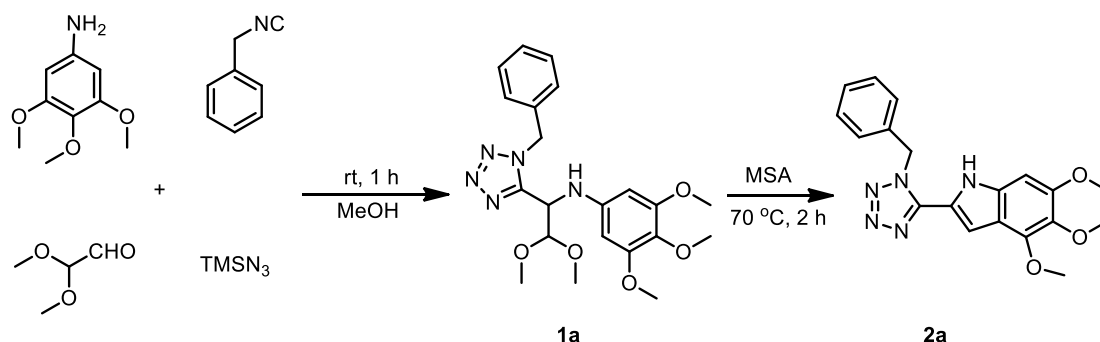

To a stirred solution of 2,2-dimethoxyacetaldehyde (10.0 mmol, 1.04 g) in MeOH (10.0 mL), the 3,4,5-trimethoxyaniline (10.0 mmol, 1.83 g), benzyl isocyanide (10.0 mmol, 1.17 g) and trimethylsilyl azide (10.0 mmol, 1.15 g) were added in a 50 mL flask. The reaction mixture was stirred vigorously for 2 h. Then, half of the solvent was removed under reduced pressure, the resulting solid was filtered and washed with  $\text{Et}_2\text{O}$  to give the compound **1a** (4.15 g, 97%) as gray solid. Afterwards, the *N*-(1-(1-benzyl-1*H*-tetrazol-5-yl)-2,2-dimethoxyethyl)-3,4,5-trimethoxyaniline (**1a**, 5.0 mmol, 2.15 g) was dissolved into methanesulfonic acid (5.0 mL) at 0 °C and then heated up to 70 °C for 2 h. Then, the reaction mixture was cooled to room temperature neutralized with an aqueous solution of  $\text{NaHCO}_3$  to pH 7, followed by extractions with ethyl acetate (3 x 30 mL). The organic layer was dried with  $\text{MgSO}_4$  and the solvent was removed under reduced pressure. The resulting solid was filtered and washed with  $\text{Et}_2\text{O}$  to give the compound **2a** (1.67 g, 91%) as brown solid.

## One-pot approach of 2-(1-benzyl-1*H*-tetrazol-5-yl)-6-methoxy-1*H*-indole (**2c**)

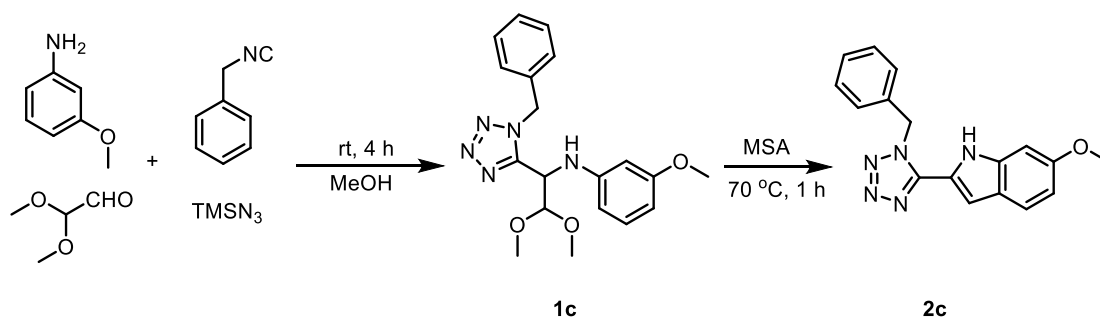

To a stirred solution of 2,2-dimethoxyacetaldehyde (1.0 mmol) in MeOH (1.0 mL), the 3-methoxyaniline (1.0 mmol), benzyl isocyanide (1.0 mmol) and trimethylsilyl azide (1.0 mmol) were added in a 5.0 mL vial. The reaction mixture was stirred vigorously for 4 h. Then, the solvent was removed under reduced pressure and the compound **1c**,

obtained as brown solid, was directly used in the next step without further purification. Afterwards, the methanesulfonic acid (1.0 mL) was added at 0 °C and heated up to 70 °C for 1 h. The reaction mixture was neutralized with an aqueous solution of NaHCO<sub>3</sub>, followed by extractions with ethyl acetate. The organic layer was dried with MgSO<sub>4</sub> and the solvent was removed under reduced pressure. The resulting solid was purified by column chromatography (PE-EA, 3:1) to give compound **2c** (149 mg, 49% in 2-steps) as white solid, as mixture of isomers as indicated above.

### Synthesis of the 2-(1*H*-tetrazol-5-yl)-1*H*-indole

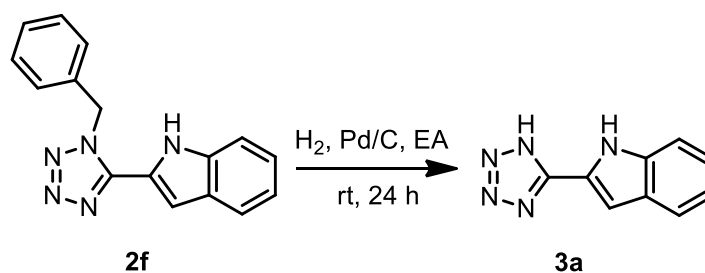

To a stirred solution of 2-(1-benzyl-1*H*-tetrazol-5-yl)-1*H*-indole (**2f**, 1.0 mmol) in ethyl acetate (15.0 mL), Pd/C (10% w/w, 0.2 mmol) was added at room temperature under H<sub>2</sub> atmosphere at 1 atm. The reaction mixture was stirred for 24 h. Then, filtration via celite followed by purification with column chromatography (PE-EA, 1:7) gave the compound **3a** (175 mg, 95%) as yellow solid.

### Synthesis of the 6-isopropyl-2-(1*H*-tetrazol-5-yl)-1*H*-indole (ATP-competitive eIF4A<sub>3</sub> inhibitor **3b**)

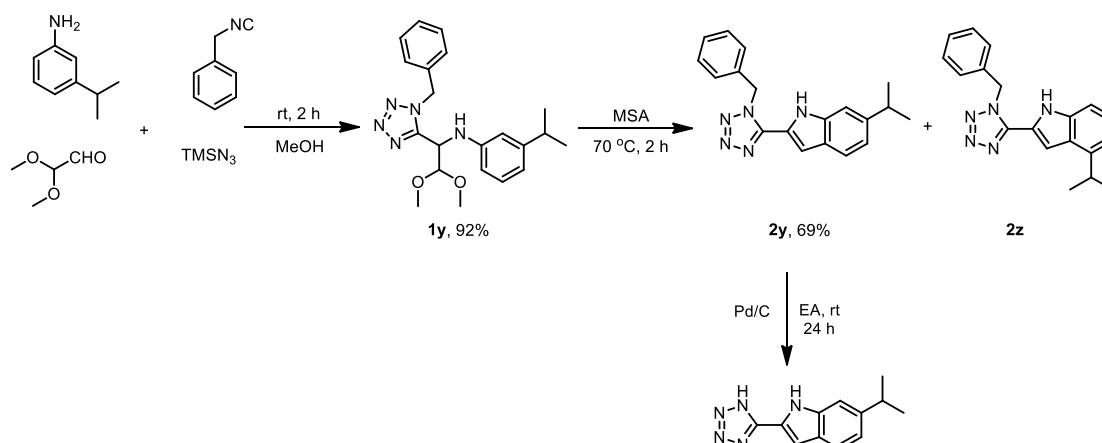

**1y** was synthesized according to the general procedure of UT-4CR; 3-isopropylaniline (2.0 mmol), (isocyanomethyl)benzene (2.0 mmol), 2,2-dimethoxyacetaldehyde (2.0 mmol) and trimethylsilyl azide (2.0 mmol) as starting materials, isolated in 92% yield as a yellow solid.

**2y** and **2z** were synthesized according to the general procedure for the Pictet-Spengler cyclization; **1y** (1.0 mmol), **2y** and **2z** were obtained as mixture of isomers in 4:1 ratio (86% yield, yellow solid), pure **2y** was obtained (69% yield, white solid) after washing with ether.

To a stirred solution of 2-(1-benzyl-1*H*-tetrazol-5-yl)-6-isopropyl-1*H*-indole (**2y**, 0.2 mmol) in ethyl acetate (2.0 mL), Pd/C (10% w/w, 0.04 mmol) was added at room temperature under H<sub>2</sub> atmosphere at 1 atm. The reaction mixture was stirred for 24 h. Then, filtration with celite and remove the solvent to give the compound **3b** (44 mg, 98%) as white solid.

### Procedure for the formylation reactions

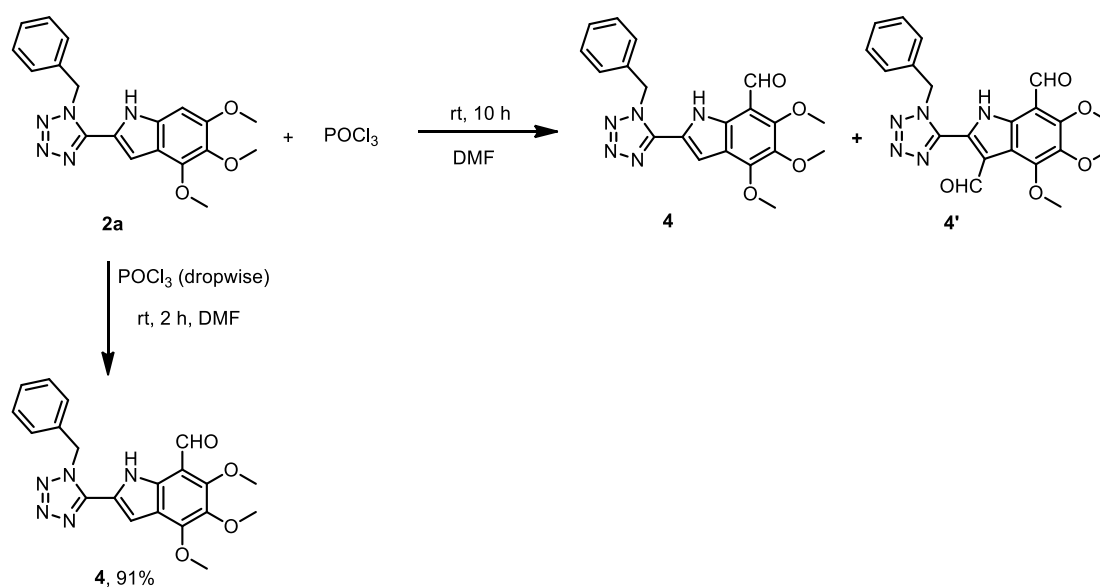

To a stirred solution of **2a** (1.0 mmol) in DMF (1.0 mL), phosphorus oxychloride (1.2 mmol) was added at room temperature and the reaction mixture was stirred for 10 h. Then, the reaction was quenched with NaHCO<sub>3</sub> solution to pH 7 and extracted with ethyl acetate (3 x 10 mL). The organic layer was dried with MgSO<sub>4</sub> and the solvent was removed under reduced pressure. The resulting solid was purified by column chromatography (PE-EA, 1:1) to give the compound mixture **4** and **4'** as a brown solid in a ratio 1:1.<sup>[2]</sup>

To a stirred solution of **2a** (1.0 mmol) in DMF (1.0 mL), the phosphorus oxychloride (1.2 mmol in 0.4 mL DMF) was added dropwise. The reaction mixture was stirred vigorously for 2 h at room temperature, then the reaction was quenched with NaHCO<sub>3</sub> solution to pH 7 and extracted with ethyl acetate (3 x 10 mL). The organic layer was dried with MgSO<sub>4</sub> and the solvent was removed under reduced pressure. The resulting solid was washed with ethyl acetate to give compound **4** (358 mg, 91%) as a green solid.<sup>[1]</sup>

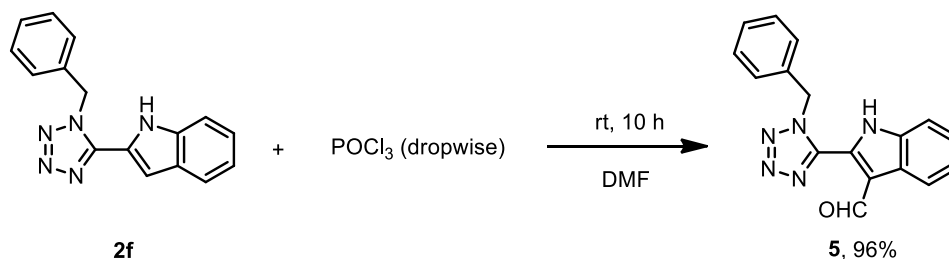

To a stirred solution of **2f** (1.0 mmol) in DMF (1.0 mL), the phosphorus oxychloride (1.2 mmol in 0.4 mL DMF) was added dropwise and the reaction mixture was stirred vigorously for 10 h at room temperature. Then, the reaction was quenched with NaHCO<sub>3</sub> solution to pH 7 and extracted with ethyl acetate (3 x 10 mL). The compound **5** (291 mg, 96%) was obtained as brown oil and used directly in the next step without further purification.

## General procedure for the UT-4CR post-modification

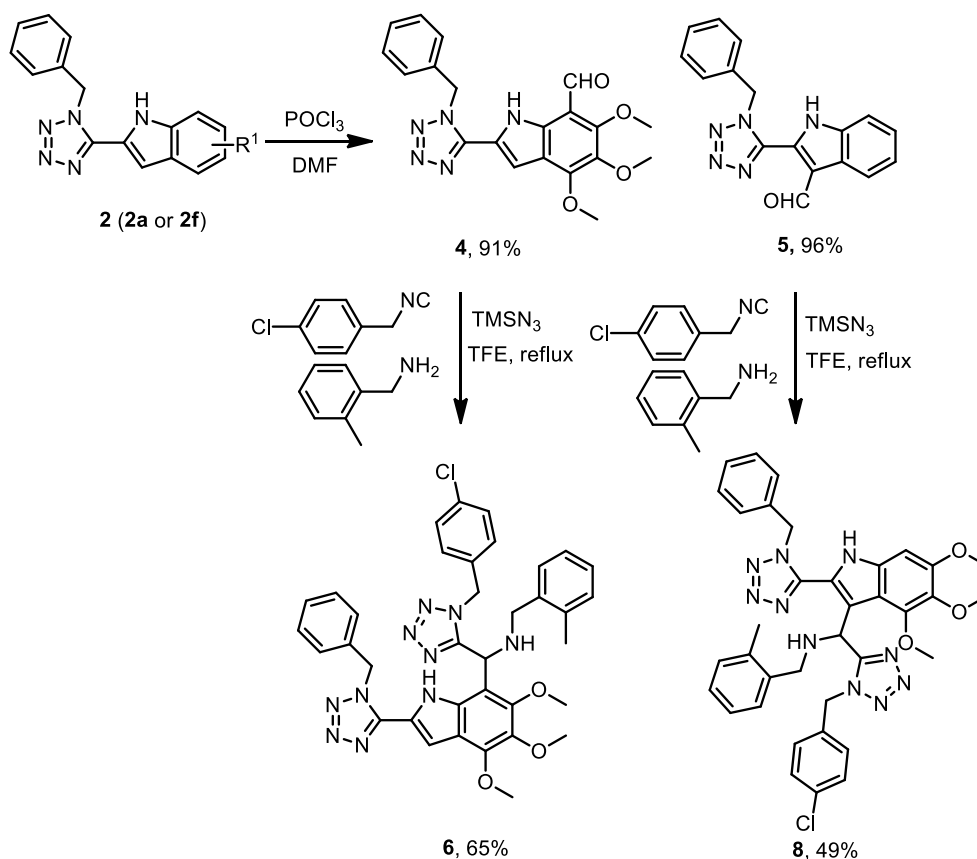

To a stirred solution of corresponding aldehyde (1.0 mmol) in TFE (1.0 mL), the *o*-tolylmethanamine (1.0 mmol), 1-chloro-4-(isocyanomethyl)benzene (1.0 mmol) and trimethylsilyl azide (1.0 mmol) were added at room temperature. Then the reaction mixture was warmed up to 80 °C and stirred vigorously for 2 h. Afterwards, the solvent was removed under reduced pressure and the resulting solid was purified by column chromatography (PE-EA, 2:1) to give compounds **6** and **8** in 65% and 49% yield, respectively.



## General procedure for the U-4CR post-modification

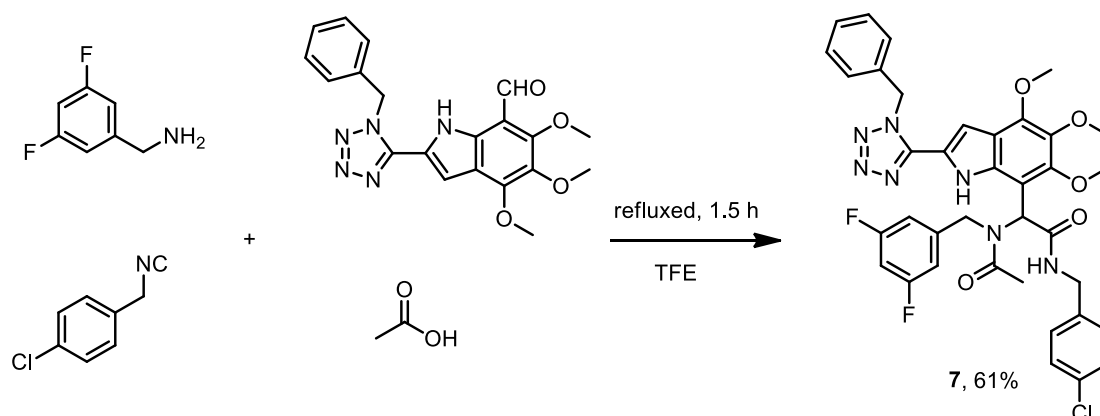

To a stirred solution of 2-(1-benzyl-1*H*-tetrazol-5-yl)-4,5,6-trimethoxy-1*H*-indole-7-carbaldehyde (1.0 mmol) in TFE (1.0 mL), the (3,5-difluorophenyl)methanamine (1.0 mmol), 1-chloro-4-(isocyanomethyl)benzene (1.0 mmol) and acetic acid (1.0 mmol) were added at room temperature. Then, the reaction mixture was warmed up to 80 °C and stirred vigorously for 1.5 h. Afterwards, the solvent was removed under reduced pressure and the resulting solid was purified by column chromatography (PE-EA, 4:1) to give the compound **7** (445 mg, 61%) as a brown solid.

## Pictet-Spengler reaction – optimization

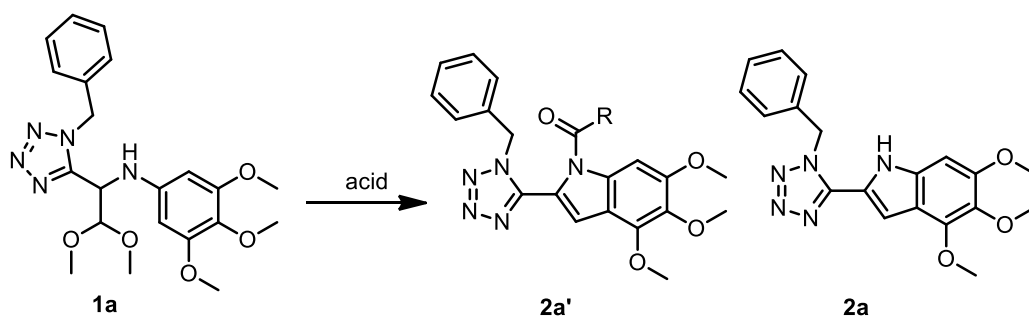

| Entry | Acid                 | Catalyst          | Temperature (°C) | Time      | Solvent     | Yield                       |
|-------|----------------------|-------------------|------------------|-----------|-------------|-----------------------------|
| 1     | formic acid          | none              | 80               | overnight | -           | <b>2a':2a</b><br>(65%: 22%) |
| 2     | acetic acid          | ZnCl <sub>2</sub> | 120              | 48 h      | -           | <b>2a':2a</b><br>(30%:30%)  |
| 3     | acetic acid          | ZnCl <sub>2</sub> | rt               | 48 h      | -           | -                           |
| 4     | HCl                  | none              | 50               | 24 h      | dioxane     | <b>2a</b> : 30%             |
| 5     | HCl                  | none              | 50               | 24 h      | water       | <b>2a</b> : 41%             |
| 6     | HCl                  | none              | 50               | 24 h      | isopropanol | <b>2a</b> : 45%             |
| 7     | TiCl <sub>4</sub>    | none              | rt               | 48 h      | DCM         | traces                      |
| 8     | methanesulfonic acid | none              | 45               | 15 h      | -           | <b>2a</b> : 90%             |
| 9     | methanesulfonic acid | none              | 70               | 2 h       | -           | <b>2a</b> : 91%             |

***N*-(1-(1-benzyl-1*H*-tetrazol-5-yl)-2,2-dimethoxyethyl)-3,4,5-trimethoxyaniline (1a)**

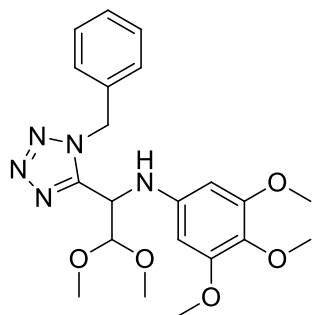

832 mg, 97% yield, gray solid. mp 131 - 134 °C. <sup>1</sup>H NMR (500 MHz, CDCl<sub>3</sub>) δ 7.28 - 7.25 (m, 3H), 7.08 (dd, *J* = 6.4, 3.0 Hz, 2H), 5.76, 5.61 (ABq, *J* = 15.5 Hz, 2H), 5.68 (s, 2H), 4.95 (d, *J* = 5.1 Hz, 1H), 4.55 (d, *J* = 5.1 Hz, 1H), 3.72 (s, 3H), 3.66 (s, 6H), 3.41 (s, 3H), 3.39 (s, 3H). <sup>13</sup>C NMR (126 MHz, CDCl<sub>3</sub>) δ 154.0, 153.7, 142.3, 134.1, 131.7, 129.0, 128.7, 127.6, 105.3, 92.1, 61.1, 56.9, 56.1, 55.8, 53.9, 51.6. HRMS (ESI) *m/z* calcd for C<sub>21</sub>H<sub>28</sub>N<sub>5</sub>O<sub>5</sub> [M + H]<sup>+</sup> = 430.2085, found 430.2081.

***N*-(1-(1-benzyl-1*H*-tetrazol-5-yl)-2,2-dimethoxyethyl)-2,3-dihydrobenzo[*b*][1,4]dioxin-6-amine (1b)**

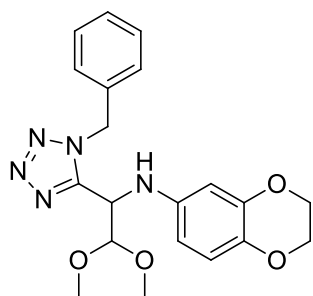

644 mg, 81% yield, white solid. mp 134 - 135 °C. <sup>1</sup>H NMR (500 MHz, DMSO-*d*<sub>6</sub>) δ 7.38 - 7.32 (m, 3H), 7.24 - 7.23 (m, 2H), 6.48 (d, *J* = 8.5 Hz, 1H), 6.18 (d, *J* = 2.7 Hz, 1H), 6.01 (dd, *J* = 8.5, 2.7 Hz, 1H), 5.89 (d, *J* = 8.9 Hz, 1H), 5.79, 5.71 (ABq, *J* = 15.4 Hz, 2H), 5.11 (dd, *J* = 8.9, 5.9 Hz, 1H), 4.70 (d, *J* = 5.9 Hz, 1H), 4.14 - 4.12 (m, 2H), 4.08 - 4.07 (m, 2H), 3.39 (s, 3H), 3.23 (s, 3H). <sup>13</sup>C NMR (126 MHz, DMSO-*d*<sub>6</sub>) δ 154.5, 143.6, 141.2, 135.4, 134.8, 128.6, 128.1, 117.0, 106.5, 106.3, 104.4, 104.3, 102.3, 101.7, 64.3, 63.7, 56.0, 55.8, 51.2, 50.2. HRMS (ESI) *m/z* calcd for C<sub>20</sub>H<sub>24</sub>N<sub>5</sub>O<sub>4</sub> [M + H]<sup>+</sup> = 398.1823, found 398.1820.

***N*-(1-(1-benzyl-1*H*-tetrazol-5-yl)-2,2-dimethoxyethyl)-3-methoxyaniline (1c)**

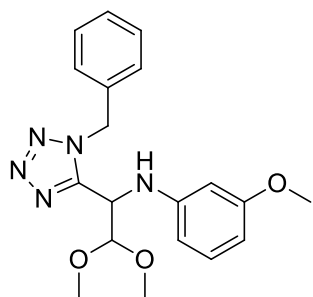

694 mg, 94% yield, brown oil. mp 110 - 113 °C. <sup>1</sup>H NMR (500 MHz, CDCl<sub>3</sub>) δ 7.31 - 7.30 (m, 3H), 7.17 - 7.15 (m, 2H), 6.89 (t, *J* = 8.2 Hz, 1H), 6.27 (ddd, *J* = 8.2, 2.4, 0.5 Hz, 1H), 6.00 (t, *J* = 2.4 Hz, 1H), 5.84 (dd, *J* = 8.2, 2.4 Hz, 1H), 5.76, 5.57 (ABq, *J* = 15.2 Hz, 2H), 4.93 (dd, *J* = 6.8, 5.1 Hz, 1H), 4.53 (d, *J* = 5.1 Hz, 1H), 4.52 (d, *J* = 6.8 Hz, 1H), 3.67 (s, 3H), 3.38 (s, 3H), 3.37 (s, 3H). <sup>13</sup>C NMR (126 MHz, CDCl<sub>3</sub>) δ 160.8, 153.8, 147.1, 133.9, 130.3, 129.1, 128.7, 127.9, 106.2, 105.3, 104.9, 100.2, 57.0, 55.3, 55.2, 52.8, 51.6. HRMS (ESI) *m/z* calcd for C<sub>19</sub>H<sub>24</sub>N<sub>5</sub>O<sub>3</sub> [M + H]<sup>+</sup> = 370.1874, found 370.1872.

***N*-(1-(1-benzyl-1*H*-tetrazol-5-yl)-2,2-dimethoxyethyl)-4-chloroaniline (1d)**

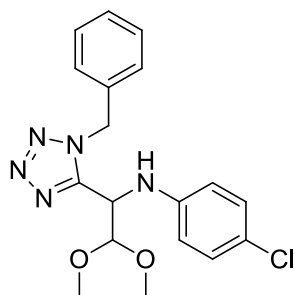

678 mg, 91% yield, gray solid. mp 98 - 100 °C. <sup>1</sup>H NMR (500 MHz, CDCl<sub>3</sub>) δ 7.35 - 7.31 (m, 3H), 7.17 - 7.15 (m, 2H), 6.91 - 6.88 (m, 2H), 6.12 - 6.10 (m, 2H), 5.81, 5.54 (ABq, *J* = 15.2 Hz, 2H), 4.81 (dd, *J* = 7.5, 5.3 Hz, 1H), 4.57 (d, *J* = 5.3 Hz, 1H), 4.52 (d, *J* = 7.5 Hz, 1H), 3.42 (s, 3H), 3.39 (s, 3H). <sup>13</sup>C NMR (126 MHz, CDCl<sub>3</sub>) δ 153.7, 144.3, 133.7, 129.3, 129.2, 129.0, 128.02, 127.97, 124.1, 115.0, 105.6, 57.2, 55.5, 52.8, 51.6. HRMS (ESI) *m/z* calcd for C<sub>18</sub>H<sub>21</sub>ClN<sub>5</sub>O<sub>2</sub> [M + H]<sup>+</sup> = 374.1378, found 374.1378.

***N*-(1-(1-benzyl-1*H*-tetrazol-5-yl)-2,2-dimethoxyethyl)-2,4-dimethylaniline (1e)**

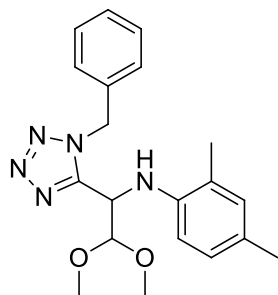

704 mg, 96% yield, white solid. mp 105 - 110 °C. <sup>1</sup>H NMR (500 MHz, CDCl<sub>3</sub>) δ 7.34 - 7.29 (m, 3H), 7.16 - 7.14 (m, 2H), 6.83 (s, 1H), 6.61 - 6.60 (m, 1H), 5.84 (d, *J* = 7.6 Hz, 1H), 5.77, 5.57 (ABq, *J* = 15.2 Hz, 2H), 4.93 (t, *J* = 5.7 Hz, 1H), 4.57 (d, *J* = 5.3 Hz, 1H), 4.27 (d, *J* = 6.1 Hz, 1H), 3.38 (s, 3H), 3.37 (s, 3H), 2.16 (s, 3H), 2.15 (s, 3H). <sup>13</sup>C NMR (126 MHz, CDCl<sub>3</sub>) δ 154.1, 141.5, 133.9, 131.4, 129.1, 128.7, 128.4, 128.0, 127.4, 123.7, 111.4, 105.4, 56.9, 55.0, 53.1, 51.5, 20.4, 17.5. HRMS (ESI) *m/z* calcd for C<sub>20</sub>H<sub>26</sub>N<sub>5</sub>O<sub>2</sub> [M + H]<sup>+</sup> = 368.2081, found 368.2079.

***N*-(1-(1-benzyl-1*H*-tetrazol-5-yl)-2,2-dimethoxyethyl)aniline (1f)**

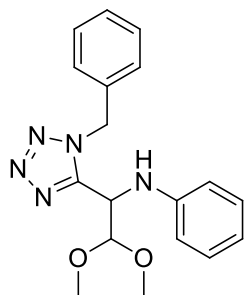

556 mg, 82% yield, white solid. mp 112 - 115 °C. <sup>1</sup>H NMR (500 MHz, CDCl<sub>3</sub>) δ 7.36 - 7.32 (m, 3H), 7.21 - 7.18 (m, 2H), 7.03 - 6.99 (m, 2H), 6.73 - 6.70 (m, 1H), 6.30 - 6.29 (m, 2H), 5.81, 5.59 (ABq, *J* = 15.2 Hz, 2H), 4.95 (dd, *J* = 7.0, 5.2 Hz, 1H), 4.59 (d, *J* = 5.2 Hz, 1H), 4.55 (d, *J* = 7.0 Hz, 1H), 3.41 (s, 3H), 3.40 (s, 3H). <sup>13</sup>C NMR (126 MHz, CDCl<sub>3</sub>) δ 153.9, 145.7, 133.8, 129.4, 129.1, 128.8, 128.0, 119.3, 113.9, 105.4, 57.0, 55.2, 52.7, 51.6. HRMS (ESI) *m/z* calcd for C<sub>18</sub>H<sub>22</sub>N<sub>5</sub>O<sub>2</sub> [M + H]<sup>+</sup> = 340.1768, found 340.1767.

***N*-(1-(1-benzyl-1*H*-tetrazol-5-yl)-2,2-dimethoxyethyl)-4-isopropylaniline (1g)**

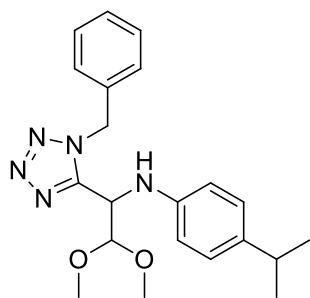

648 mg, 85% yield, colorless solid. mp 123 - 126 °C. <sup>1</sup>H NMR (500 MHz, CDCl<sub>3</sub>) δ 7.32 - 7.28 (m, 3H), 7.16 - 7.14 (m, 2H), 6.87 - 6.86 (m, 2H), 6.26 - 6.23 (m, 2H), 5.77, 5.57 (ABq, *J* = 15.2 Hz, 2H), 4.92 (t, *J* = 5.8 Hz, 1H), 4.54 (d, *J* = 5.2 Hz, 1H), 4.41 (d, *J* = 6.4 Hz, 1H), 3.37 (s, 3H), 3.36 (s, 3H), 2.77 - 2.71 (m, 1H), 1.15 (d, *J* = 6.9 Hz, 6H). <sup>13</sup>C NMR (126 MHz, CDCl<sub>3</sub>) δ 154.0, 143.6, 140.0, 133.9, 129.1, 128.7, 128.0, 127.3, 114.0, 105.3, 56.9, 55.1, 53.1, 51.6, 33.2, 24.2. HRMS (ESI) *m/z* calcd for C<sub>21</sub>H<sub>28</sub>N<sub>5</sub>O<sub>2</sub> [*M* + *H*]<sup>+</sup> = 382.2238, found 382.2237.

***N*-(1-(1-benzyl-1*H*-tetrazol-5-yl)-2,2-dimethoxyethyl)-3,4-dimethoxyaniline (1h)**

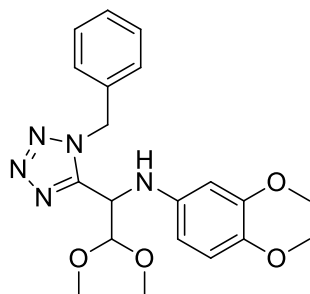

750 mg, 94% yield, gray solid. mp 120 - 125 °C. <sup>1</sup>H NMR (500 MHz, CDCl<sub>3</sub>) δ 7.31 - 7.27 (m, 3H), 7.13 - 7.11 (m, 2H), 6.49 (d, *J* = 8.6 Hz, 1H), 6.12 (d, *J* = 2.7 Hz, 1H), 5.76, 5.58 (ABq, *J* = 15.3 Hz, 2H), 5.71 (dd, *J* = 8.6, 2.7 Hz, 1H), 4.86 (t, *J* = 5.1 Hz, 1H), 4.54 (d, *J* = 5.2 Hz, 1H), 4.26 (d, *J* = 5.0 Hz, 1H), 3.75 (s, 3H), 3.71 (s, 3H), 3.40 (s, 3H), 3.38 (s, 3H). <sup>13</sup>C NMR (126 MHz, CDCl<sub>3</sub>) δ 154.0, 150.0, 143.1, 140.3, 134.0, 129.1, 128.7, 127.9, 112.8, 105.4, 104.9, 100.7, 57.0, 56.6, 55.8, 55.4, 54.0, 51.5. HRMS (ESI) *m/z* calcd for C<sub>20</sub>H<sub>26</sub>N<sub>5</sub>O<sub>4</sub> [*M* + *H*]<sup>+</sup> = 400.1979, found 400.1978.

***N*-[1-(1-benzyl-1*H*-tetrazol-5-yl)-2,2-dimethoxyethyl]-3,5-dimethylaniline (1i)**

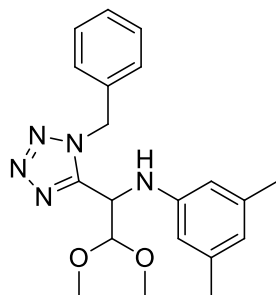

698 mg, 95% yield, white solid. mp 127 - 129 °C. <sup>1</sup>H NMR (500 MHz, CDCl<sub>3</sub>) δ 7.33 - 7.29 (m, 3H), 7.18 - 7.17 (m, 2H), 6.37 (s, 1H), 6.00 (s, 2H), 5.75, 5.60 (ABq, *J* = 15.2 Hz, 2H), 4.94 (dd, *J* = 6.7, 5.2 Hz, 1H), 4.53 (d, *J* = 5.1 Hz, 1H), 4.39 (d, *J* = 6.8 Hz, 1H), 3.37 (s, 3H), 3.37 (s, 3H), 2.10 (s, 6H). <sup>13</sup>C NMR (126 MHz, CDCl<sub>3</sub>) δ 153.9, 145.8, 139.2, 134.0, 129.1, 128.7, 128.0, 121.5, 111.8, 105.4, 56.9, 55.2, 52.8, 51.5, 21.5. HRMS (ESI) *m/z* calcd for C<sub>20</sub>H<sub>26</sub>N<sub>5</sub>O<sub>2</sub> [M + H]<sup>+</sup> = 368.2081, found 368.2079.

***N*-[1-(1-benzyl-1*H*-tetrazol-5-yl)-2,2-dimethoxyethyl]-5,6,7,8-tetrahydro naphthalen-1-amine (1j)**

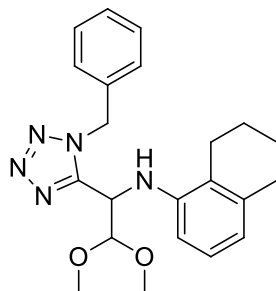

636 mg, 81% yield, yellow oil. <sup>1</sup>H NMR (500 MHz, CDCl<sub>3</sub>) δ 7.31 - 7.26 (m, 3H), 7.13 - 7.11 (m, 2H), 6.71 (t, *J* = 7.8 Hz, 1H), 6.49 (d, *J* = 7.6 Hz, 1H), 5.82 - 5.76 (m, 1H), 5.79, 5.58 (ABq, *J* = 15.2 Hz, 2H), 4.99 (t, *J* = 5.5 Hz, 1H), 4.59 (d, *J* = 5.1 Hz, 1H), 4.39 (d, *J* = 5.9 Hz, 1H), 3.38 (s, 3H), 3.38 (s, 3H), 2.68 (t, *J* = 6.1 Hz, 2H), 2.43 (t, *J* = 6.5 Hz, 2H), 1.88 - 1.80 (m, 2H), 1.73 - 1.68 (m, 2H). <sup>13</sup>C NMR (126 MHz, CDCl<sub>3</sub>) δ 154.1, 143.5, 138.1, 133.9, 129.0, 128.6, 127.9, 126.1, 122.5, 120.3, 108.0, 105.3, 56.9, 55.1, 52.7, 51.5, 30.1, 23.9, 23.1, 22.6. HRMS (ESI) *m/z* calcd for C<sub>22</sub>H<sub>28</sub>N<sub>5</sub>O<sub>2</sub> [M + H]<sup>+</sup> = 394.2238, found 394.2234.

***N*-(2,2-dimethoxy-1-(1-phenyl-1*H*-tetrazol-5-yl)ethyl)-3,4,5-trimethoxyaniline (1k)**

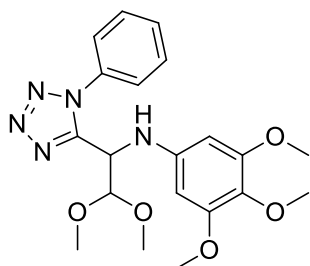

556 mg, 67% yield, gray solid. mp 133 - 135 °C. <sup>1</sup>H NMR (500 MHz, CDCl<sub>3</sub>) δ 7.59 - 7.53 (m, 3H), 7.50 - 7.48 (m, 2H), 5.62 (s, 2H), 4.94 - 4.91 (m, 1H), 4.82 (d, *J* = 6.3 Hz, 1H), 4.23 (d, *J* = 9.0 Hz, 1H), 3.70 (s, 3H), 3.60 (s, 6H), 3.47 (s, 3H), 3.43 (s, 3H). <sup>13</sup>C NMR (126 MHz, CDCl<sub>3</sub>) δ 154.7, 154.0, 142.1, 134.0, 131.6, 130.7, 129.7, 125.9, 105.8, 92.1, 61.1, 57.4, 56.0, 55.2, 52.5. HRMS (ESI) *m/z* calcd for C<sub>20</sub>H<sub>26</sub>N<sub>5</sub>O<sub>5</sub> [M + H]<sup>+</sup> = 416.1928, found 416.1928.

***N*-(1-(1-(4-chlorophenyl)-1*H*-tetrazol-5-yl)-2,2-dimethoxyethyl)-3,4,5-trimethoxyaniline (1l)**

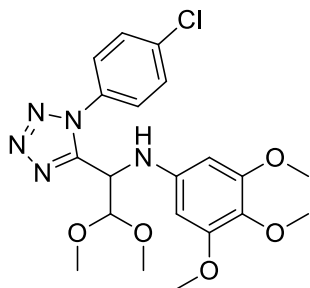

862 mg, 96% yield, gray solid. mp 162 - 166 °C. <sup>1</sup>H NMR (500 MHz, CDCl<sub>3</sub>) δ 7.49 (d, *J* = 8.7 Hz, 2H), 7.38 (d, *J* = 8.7 Hz, 2H), 5.60 (s, 2H), 4.92 (dd, *J* = 8.9, 5.9 Hz, 1H), 4.80 (d, *J* = 5.9 Hz, 1H), 4.17 (d, *J* = 8.9 Hz, 1H), 3.71 (s, 3H), 3.64 (s, 6H), 3.48 (s, 3H), 3.44 (s, 3H). <sup>13</sup>C NMR (126 MHz, CDCl<sub>3</sub>) δ 154.6, 154.1, 141.9, 137.0, 132.5, 131.7, 129.8, 127.4, 105.6, 92.0, 61.2, 57.3, 56.0, 55.6, 52.8. HRMS (ESI) *m/z* calcd for C<sub>20</sub>H<sub>25</sub>ClN<sub>5</sub>O<sub>5</sub> [M + H]<sup>+</sup> = 450.1539, found 450.1538.

***N*-(1-(1-(cyclohexyl)-1*H*-tetrazol-5-yl)-2,2-dimethoxyethyl)-3,4,5-trimethoxyaniline (1m)**

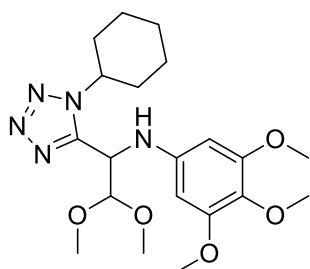



664 mg, 79% yield, gray solid. mp 133 - 135 °C. <sup>1</sup>H NMR (500 MHz, CDCl<sub>3</sub>) δ 5.83 (s, 2H), 5.00 (dd, *J* = 6.0, 4.8 Hz, 1H), 4.64 (d, *J* = 4.8 Hz, 1H), 4.58 (tt, *J* = 11.6, 3.8 Hz, 1H), 4.47 (d, *J* = 6.0 Hz, 1H), 3.72 (s, 6H), 3.70 (s, 3H), 3.48 (s, 3H), 3.43 (s, 3H), 2.02 - 1.0 (m, 5H), 1.71 - 1.64 (m, 2H), 1.30 - 1.19 (m, 3H). <sup>13</sup>C NMR (126 MHz, CDCl<sub>3</sub>) δ 154.1, 152.6, 142.8, 131.5, 105.6, 91.8, 65.9, 61.1, 58.8, 56.9, 56.4, 56.1, 53.9, 33.3, 33.0, 25.59, 25.55, 25.0, 15.4. HRMS (ESI) *m/z* calcd for C<sub>20</sub>H<sub>32</sub>N<sub>5</sub>O<sub>5</sub> [M + H]<sup>+</sup> = 422.2398, found 422.2396.

***N*-(2,2-dimethoxy-1-(1-(2-(trifluoromethyl)phenyl)-1*H*-tetrazol-5-yl)ethyl)-3,4,5-trimethoxyaniline (1n)**

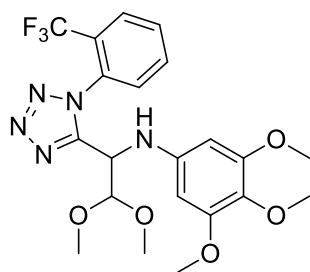

512 mg, 53% yield, yellow solid. mp 134 - 136 °C. <sup>1</sup>H NMR (500 MHz, CDCl<sub>3</sub>) δ 7.82 (d, *J* = 7.8 Hz, 1H), 7.71 (t, *J* = 7.6 Hz, 1H), 7.65 (s, 1H), 7.27 (d, *J* = 14.2 Hz, 1H), 5.71 (s, 2H), 4.81 - 4.75 (m, 1H), 4.71 (s, 1H), 4.12 (s, 1H), 3.72 (s, 3H), 3.69 (s, 6H), 3.42 (s, 3H), 3.40 (s, 3H). <sup>13</sup>C NMR (126 MHz, CDCl<sub>3</sub>) δ 155.6, 154.0, 142.3, 132.6, 131.7, 131.5, 131.1, 127.9, 127.7, 123.5, 121.3, 105.7, 92.1, 61.1, 57.0, 56.1, 53.7. HRMS (ESI) *m/z* calcd for C<sub>21</sub>H<sub>25</sub>F<sub>3</sub>N<sub>5</sub>O<sub>5</sub> [M + H]<sup>+</sup> = 484.1802, found 484.1802.

***N*-(2,2-dimethoxy-1-(1-(*o*-tolyl)-1*H*-tetrazol-5-yl)ethyl)-3,4,5-trimethoxyaniline (1o)**

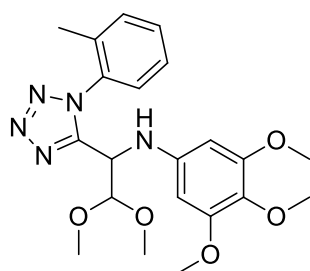

780 mg, 91% yield, gray solid. mp 149 - 151 °C. <sup>1</sup>H NMR (500 MHz, CDCl<sub>3</sub>) δ 7.46 (td, *J* = 7.6, 1.2 Hz, 1H), 7.35 - 7.29 (m, 2H), 7.13 (d, *J* = 6.3 Hz, 1H), 5.71 (s, 2H), 4.78 - 4.73 (m, 2H), 4.07 (d, *J* = 9.1 Hz, 1H), 3.72 (s, 3H), 3.66 (s, 6H), 3.44 (s, 3H), 3.42 (s, 3H), 1.84 (s, 3H). <sup>13</sup>C NMR (126 MHz, CDCl<sub>3</sub>) δ 155.0, 154.0, 142.2, 136.6, 132.8, 131.9, 131.5, 131.1, 127.4, 126.7, 105.6, 92.8, 61.1, 57.1, 56.0, 53.3, 17.2. HRMS (ESI) *m/z* calcd for C<sub>21</sub>H<sub>28</sub>N<sub>5</sub>O<sub>5</sub> [M + H]<sup>+</sup> = 430.2085, found 430.2082.

***N*-[1-(1-(4-chlorophenyl)-1*H*-tetrazol-5-yl)-2,2-dimethoxyethyl]-2,4-dimethylaniline (1p)**

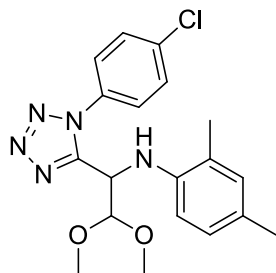

510 mg, 66% yield, colorless solid. mp 119 - 121 °C. <sup>1</sup>H NMR (500 MHz, CDCl<sub>3</sub>) δ 7.49 - 7.46 (m, 2H), 7.33 - 7.30 (m, 2H), 6.83 (s, 1H), 6.71 (d, *J* = 8.1 Hz, 1H), 6.08 (d, *J* = 8.1 Hz, 1H), 4.95 (dd, *J* = 8.4, 5.8 Hz, 1H), 4.84 (d, *J* = 5.8 Hz, 1H), 4.07 (d, *J* = 8.4 Hz, 1H), 3.44 (s, 6H), 2.17 (s, 3H), 1.99 (s, 3H). <sup>13</sup>C NMR (126 MHz, CDCl<sub>3</sub>) δ 155.0, 141.0, 136.9, 132.6, 131.7, 129.7, 128.7, 127.5, 127.3, 123.9, 111.4, 105.6, 57.1, 55.1, 52.1, 20.4, 17.3. HRMS (ESI) *m/z* calcd for C<sub>19</sub>H<sub>23</sub>ClN<sub>5</sub>O<sub>2</sub> [M + H]<sup>+</sup> = 388.1535, found 388.1537.

***N*-[1-(1-cyclohexyl-1*H*-tetrazol-5-yl)-2,2-dimethoxyethyl]-2,4-dimethylaniline (1q)**

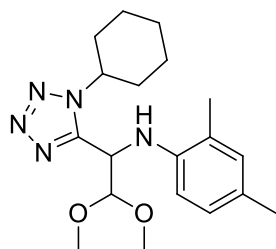

359 mg, 50% yield, white solid. mp 129 - 133 °C. <sup>1</sup>H NMR (500 MHz, CDCl<sub>3</sub>) δ 6.90 (s, 1H), 6.82 (d, *J* = 8.1 Hz, 1H), 6.38 (d, *J* = 8.1 Hz, 1H), 5.07 (t, *J* = 5.2 Hz, 1H), 4.71 (d, *J* = 4.8 Hz, 1H), 4.66 (tt, *J* = 11.6, 3.8 Hz, 1H), 4.36 (d, *J* = 5.6 Hz, 1H), 3.48 (s, 3H), 3.45 (s, 3H), 2.22 (s, 3H), 2.20 (s, 3H), 2.06 - 1.80 (m, 5H), 1.74 - 1.62 (m, 2H), 1.41 - 1.26 (m, 3H). <sup>13</sup>C NMR (126 MHz, CDCl<sub>3</sub>) δ 152.8, 141.8, 131.5, 128.4, 127.5, 123.5, 111.3, 105.6, 58.7, 56.9, 56.1, 53.4, 33.2, 33.1, 25.64, 25.61, 25.0, 20.4, 17.5. HRMS (ESI) *m/z* calcd for C<sub>19</sub>H<sub>30</sub>N<sub>5</sub>O<sub>2</sub> [M + H]<sup>+</sup> = 360.2394, found 360.2393.

***N*-(1-(1-(4-chlorophenyl)-1*H*-tetrazol-5-yl)-2,2-dimethoxyethyl)aniline (1r)**

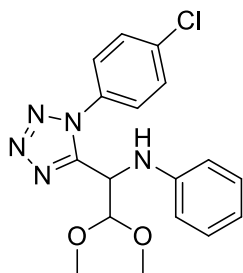

381 mg, 53% yield, white solid. mp 165 - 163 °C. <sup>1</sup>H NMR (500 MHz, CDCl<sub>3</sub>) δ 7.52 - 7.49 (m, 2H), 7.39 - 7.36 (m, 2H), 7.08 - 7.06 (m, 2H), 6.73 (t, *J* = 7.4 Hz, 1H), 6.38 (d, *J* = 7.7 Hz, 2H), 4.95 (dd, *J* = 8.9, 5.9 Hz, 1H), 4.81 (d, *J* = 5.9 Hz, 1H), 4.34 (d, *J* = 8.9 Hz, 1H), 3.43 (s, 6H). <sup>13</sup>C NMR (126 MHz, CDCl<sub>3</sub>) δ 154.6, 145.3, 137.0, 132.5, 129.8, 129.5, 127.4, 119.6, 113.9, 105.7, 57.2, 55.2, 51.8. HRMS (ESI) *m/z* calcd for C<sub>17</sub>H<sub>19</sub>ClN<sub>5</sub>O<sub>2</sub> [*M* + *H*]<sup>+</sup> = 360.1222, found 360.1222.

***N*-(1-(1-cyclohexyl-1*H*-tetrazol-5-yl)-2,2-dimethoxyethyl)aniline (1s)**

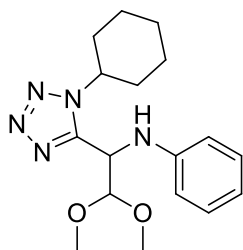

344 mg, 52% yield, white solid. mp 131 - 133 °C. <sup>1</sup>H NMR (500 MHz, CDCl<sub>3</sub>) δ 7.16 - 7.12 (m, 2H), 6.78 - 6.75 (m, 1H), 6.62 - 6.60 (m, 2H), 5.03 (dd, *J* = 6.3, 4.8 Hz, 1H), 4.67 (d, *J* = 4.8 Hz, 1H), 4.61 - 4.56 (m, 2H), 3.47 (s, 3H), 3.44 (s, 3H), 2.01 - 1.82 (m, 5H), 1.72 - 1.68 (m, 1H), 1.67-1.64 (m, 1H), 1.38 - 1.26 (m, 3H). <sup>13</sup>C NMR (126 MHz, CDCl<sub>3</sub>) δ 152.6, 146.1, 129.6, 119.5, 113.8, 105.7, 58.7, 57.0, 56.3, 53.2, 33.3, 33.1, 25.63, 25.55, 25.0. HRMS (ESI) *m/z* calcd for C<sub>17</sub>H<sub>26</sub>N<sub>5</sub>O<sub>2</sub> [*M* + *H*]<sup>+</sup> = 332.2081, found 332.2079.

***N*-(1-(1-(4-chlorobenzyl)-1*H*-tetrazol-5-yl)-2,2-dimethoxyethyl)-3-methoxyaniline (1t)**

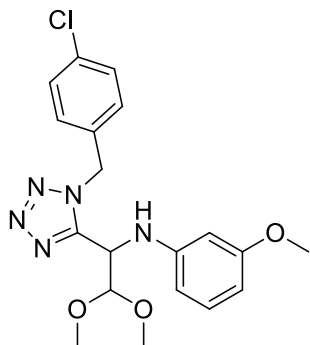

717 mg, 89% yield, yellow oil.  $^1\text{H}$  NMR (500 MHz,  $\text{CDCl}_3$ )  $\delta$  7.26 - 7.22 (m, 2H), 7.04 (d,  $J = 8.5$  Hz, 2H), 6.96 - 6.92 (m, 1H), 6.31 - 6.29 (m, 1H), 5.93 - 5.91 (m, 2H), 5.72, 5.55 (ABq,  $J = 15.3$  Hz, 2H), 4.95 (d,  $J = 4.7$  Hz, 1H), 4.61 (d,  $J = 4.7$  Hz, 1H), 3.69 (s, 3H), 3.42 (s, 3H), 3.39 (s, 3H).  $^{13}\text{C}$  NMR (126 MHz,  $\text{CDCl}_3$ )  $\delta$  160.9, 153.7, 146.9, 134.7, 132.4, 130.4, 129.2, 106.6, 105.4, 105.0, 100.4, 57.1, 55.8, 55.2, 53.2, 50.9. HRMS (ESI)  $m/z$  calcd for  $\text{C}_{19}\text{H}_{23}\text{ClN}_5\text{O}_3$   $[\text{M} + \text{H}]^+ = 404.1484$ , found 404.1483.

***N*-(1-(1-benzyl-1*H*-tetrazol-5-yl)-2,2-dimethoxyethyl)-3-methylaniline (1u)**

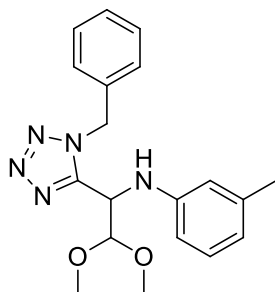

685 mg, 97% yield, white solid. mp 124 - 129 °C.  $^1\text{H}$  NMR (500 MHz,  $\text{CDCl}_3$ )  $\delta$  7.32 - 7.31 (m, 3H), 7.18 - 7.16 (m, 2H), 6.88 (t,  $J = 7.8$  Hz, 1H), 6.53 (d,  $J = 7.5$  Hz, 1H), 6.20 (s, 1H), 6.07 (dd,  $J = 8.0, 2.3$  Hz, 1H), 5.77, 5.59 (ABq,  $J = 15.2$  Hz, 2H), 4.93 (dd,  $J = 6.9, 5.2$  Hz, 1H), 4.55 (d,  $J = 5.2$  Hz, 1H), 4.44 (d,  $J = 6.9$  Hz, 1H), 3.38 (s, 3H), 3.38 (s, 3H), 2.14 (s, 3H).  $^{13}\text{C}$  NMR (126 MHz,  $\text{CDCl}_3$ )  $\delta$  153.9, 145.8, 139.3, 133.93, 129.3, 129.1, 128.8, 128.0, 120.4, 114.8, 110.8, 105.4, 57.0, 55.2, 52.8, 51.6, 21.6. HRMS (ESI)  $m/z$  calcd for  $\text{C}_{19}\text{H}_{24}\text{N}_5\text{O}_2$   $[\text{M} + \text{H}]^+ = 354.1925$ , found 354.1922.

***N*-(1-(1-benzyl-1*H*-tetrazol-5-yl)-2,2-dimethoxyethyl)-3-fluoroaniline (1v)**

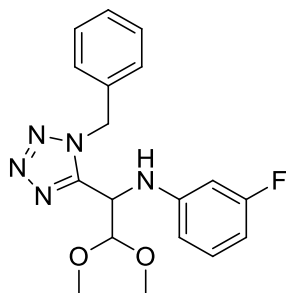

649 mg, 91% yield, yellow solid. mp 106 - 109 °C. <sup>1</sup>H NMR (500 MHz, CDCl<sub>3</sub>) δ 7.34 - 7.32 (m, 3H), 7.18 - 7.16 (m, 2H), 6.93 - 6.89 (m, 1H), 6.39 - 6.35 (m, 1H), 6.01 (dd, *J* = 8.2, 2.0 Hz, 1H), 5.92 (dt, *J* = 11.1, 2.3 Hz, 1H), 5.81, 5.56 (ABq, *J* = 15.2 Hz, 2H), 4.84 (dd, *J* = 7.3, 5.2 Hz, 1H), 4.60 (d, *J* = 7.3 Hz, 1H), 4.57 (d, *J* = 5.2 Hz, 1H), 3.42 (s, 3H), 3.40 (s, 3H). <sup>13</sup>C NMR (126 MHz, CDCl<sub>3</sub>) δ 163.8 (d, <sup>1</sup>*J*<sub>C-F</sub> = 244.7 Hz), 153.6, 147.5 (d, <sup>3</sup>*J*<sub>C-F</sub> = 10.4 Hz), 133.6, 130.6 (d, <sup>3</sup>*J*<sub>C-F</sub> = 10.1 Hz), 129.3, 129.0, 127.9, 109.5 (d, <sup>4</sup>*J*<sub>C-F</sub> = 2.4 Hz), 106.0 (d, <sup>2</sup>*J*<sub>C-F</sub> = 21.5 Hz), 105.6, 100.9 (d, <sup>2</sup>*J*<sub>C-F</sub> = 25.5 Hz), 57.2, 55.6, 52.6, 51.7. <sup>19</sup>F NMR (471 MHz, CDCl<sub>3</sub>) δ -112.11. HRMS (ESI) *m/z* calcd for C<sub>18</sub>H<sub>21</sub>FN<sub>5</sub>O<sub>2</sub> [M + H]<sup>+</sup> = 358.1674, found 358.1674.

***N*-(1-(1-benzyl-1*H*-tetrazol-5-yl)-2,2-dimethoxyethyl)-3-chloroaniline (1w)**

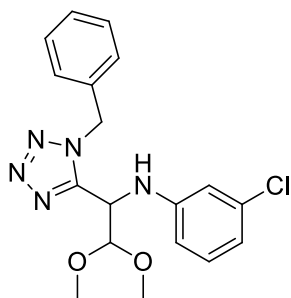

671 mg, 90% yield, yellow solid. mp 121 - 125 °C. <sup>1</sup>H NMR (500 MHz, CDCl<sub>3</sub>) δ 7.33 - 7.32 (m, 3H), 7.16 - 7.14 (m, 2H), 6.88 (t, *J* = 8.1 Hz, 1H), 6.66 - 6.64 (m, 1H), 6.29 (t, *J* = 2.1 Hz, 1H), 6.08 (ddd, *J* = 8.2, 2.3, 0.6 Hz, 1H), 5.80, 5.57 (ABq, *J* = 15.2 Hz, 2H), 4.84 (dd, *J* = 7.3, 5.2 Hz, 1H), 4.57 - 4.55 (m, 2H), 3.42 (s, 3H), 3.40 (s, 3H). <sup>13</sup>C NMR (126 MHz, CDCl<sub>3</sub>) δ 153.6, 146.9, 135.1, 133.6, 130.4, 129.3, 129.0, 127.9, 119.4, 113.9, 111.8, 105.6, 57.2, 55.7, 52.6, 51.7. HRMS (ESI) *m/z* calcd for C<sub>18</sub>H<sub>21</sub>ClN<sub>5</sub>O<sub>2</sub> [M + H]<sup>+</sup> = 374.1378, found 374.1378.

***N*-(1-(1-benzyl-1*H*-tetrazol-5-yl)-2,2-dimethoxyethyl)-3-bromoaniline (1x)**

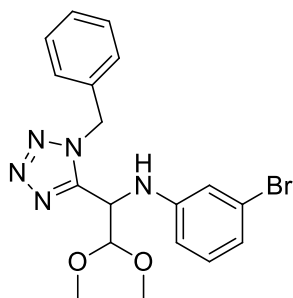

692 mg, 83% yield, yellow solid. mp 129 - 132 °C. <sup>1</sup>H NMR (500 MHz, CDCl<sub>3</sub>) δ 7.33 - 7.32 (m, 3H), 7.16 - 7.14 (m, 2H), 6.83 - 6.80 (m, 2H), 6.49 - 6.48 (m, 1H), 6.12 - 6.09 (m, 1H), 5.79, 5.57 (ABq, *J* = 15.2 Hz, 2H), 4.83 (dd, *J* = 7.3, 5.1 Hz, 1H), 4.57 - 4.59 (m, 2H), 3.41 (s, 3H), 3.39 (s, 3H). <sup>13</sup>C NMR (126 MHz, CDCl<sub>3</sub>) δ 153.5, 147.0, 133.6, 130.7, 129.3, 129.0, 127.8, 123.3, 122.3, 116.9, 112.1, 105.6, 57.2, 55.7, 52.5, 51.7. HRMS (ESI) *m/z* calcd for C<sub>18</sub>H<sub>21</sub>BrN<sub>5</sub>O<sub>2</sub> [*M* + *H*]<sup>+</sup> = 418.0873, found 418.0873.

***N*-(1-(1-benzyl-1*H*-tetrazol-5-yl)-2,2-dimethoxyethyl)-3-isopropylaniline (1y)**

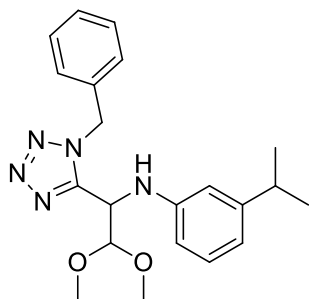

701 mg, 92% yield, yellow solid. mp 98 - 103 °C. <sup>1</sup>H NMR (500 MHz, CDCl<sub>3</sub>) δ 7.31 - 7.29 (m, 3H), 7.16 - 7.14 (m, 2H), 6.91 (t, *J* = 7.8 Hz, 1H), 6.60 (d, *J* = 7.6 Hz, 1H), 6.344 - 6.337 (m, 1H), 6.03 - 6.01 (m, 1H), 5.77, 5.58 (ABq, *J* = 15.2 Hz, 2H), 4.98 - 4.96 (m, 1H), 4.55 (d, *J* = 5.1 Hz, 1H), 4.47 (d, *J* = 5.0 Hz, 1H), 3.38 (s, 3H), 3.38 (s, 3H), 2.69 (dt, *J* = 13.8, 6.9 Hz, 1H), 1.14 (dd, *J* = 6.9, 3.2 Hz, 6H). <sup>13</sup>C NMR (126 MHz, CDCl<sub>3</sub>) δ 153.9, 150.4, 145.8, 134.0, 129.4, 129.1, 128.7, 128.0, 117.7, 112.7, 110.8, 105.4, 57.0, 55.3, 52.9, 51.6, 34.2, 23.98, 23.96. HRMS (ESI) *m/z* calcd for C<sub>21</sub>H<sub>28</sub>N<sub>5</sub>O<sub>2</sub> [*M* + *H*]<sup>+</sup> = 382.2238, found 382.2238.

### 2-(1-benzyl-1*H*-tetrazol-5-yl)-4,5,6-trimethoxy-1*H*-indole (2a)

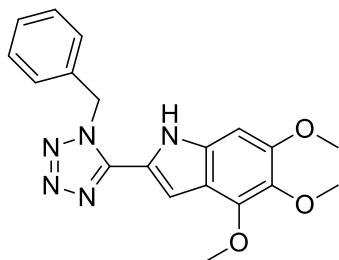

332 mg, 91% yield, white solid. mp 255 - 260 °C. <sup>1</sup>H NMR (500 MHz, DMSO-*d*<sub>6</sub>) δ 11.99 (s, 1H), 7.38 - 7.35 (m, 2H), 7.31 - 7.30 (m, 1H), 7.20 (d, *J* = 7.1 Hz, 2H), 7.04 (d, *J* = 1.4 Hz, 1H), 6.70 (s, 1H), 6.00 (s, 2H), 3.93 (s, 3H), 3.79 (s, 3H), 3.67 (s, 3H). <sup>13</sup>C NMR (126 MHz, DMSO-*d*<sub>6</sub>) δ 152.7, 148.2, 145.5, 135.3, 134.6, 129.0, 128.2, 127.1, 117.9, 114.9, 103.2, 89.5, 60.9, 60.3, 55.8, 50.9. HRMS (ESI) *m/z* calcd for C<sub>19</sub>H<sub>20</sub>N<sub>5</sub>O<sub>3</sub> [M + H]<sup>+</sup> = 366.1561, found 366.1558.

### 7-(1-benzyl-1*H*-tetrazol-5-yl)-3,6-dihydro-2*H*-[1,4]dioxino[2,3-*f*]indole (2b-1)

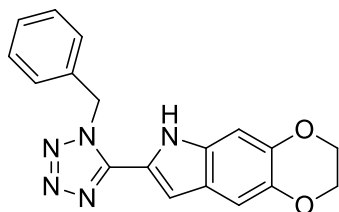

Mixture of isomers was formed in 5:1 ratio, but compound **2b-1** (77% yield, white solid) was obtained as only one isomer after washing with chloroform. 306 mg, 92% yield (both isomers before washing steps), yellow solid. mp 220 - 223 °C. <sup>1</sup>H NMR (500 MHz, DMSO-*d*<sub>6</sub>) δ 11.75 (s, 1H), 7.37 - 7.28 (m, 3H), 7.20 (d, *J* = 7.1 Hz, 2H), 7.01 (s, 1H), 6.95 (s, 1H), 6.88 (s, 1H), 5.96 (s, 2H), 4.23 - 4.21 (m, 2H), 4.20 - 4.19 (m, 2H). <sup>13</sup>C NMR (126 MHz, DMSO-*d*<sub>6</sub>) δ 148.4, 142.7, 139.5, 134.5, 128.9, 128.2, 127.1, 122.0, 106.6, 104.3, 98.6, 64.2, 63.8, 50.8. HRMS (ESI) *m/z* calcd for C<sub>18</sub>H<sub>16</sub>N<sub>5</sub>O<sub>2</sub> [M + H]<sup>+</sup> = 334.1299 found 334.1299.

### 2-(1-benzyl-1*H*-tetrazol-5-yl)-6-methoxy-1*H*-indole (2c-1)

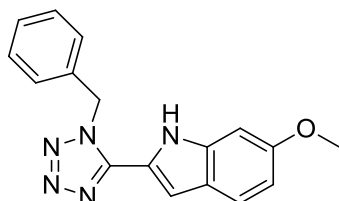

Mixture of isomers was formed in 10:1 ratio, but **2c-1** (79% yield, white solid) was obtained as only one isomer after washing with ether. 149 mg, 87% yield (both isomers before washing steps), white solid. mp 207 - 211 °C. <sup>1</sup>H NMR (500 MHz, DMSO-*d*<sub>6</sub>) δ 11.99 (s, 1H), 7.52 (d, *J* = 8.7 Hz, 1H), 7.41 - 7.33 (m, 3H), 7.25 (d, *J* = 7.8 Hz, 2H),

7.09 (s, 1H), 6.97 (s, 1H), 6.77 (d,  $J = 8.7$  Hz, 1H), 5.99 (s, 2H), 3.80 (s, 3H).  $^{13}\text{C}$  NMR (126 MHz,  $\text{DMSO-}d_6$ )  $\delta$  157.5, 148.3, 138.3, 134.4, 128.9, 128.1, 127.1, 122.1, 121.8, 118.7, 105.2, 94.0, 55.2, 50.8. HRMS (ESI)  $m/z$  calcd for  $\text{C}_{17}\text{H}_{16}\text{N}_5\text{O}$   $[\text{M} + \text{H}]^+ = 306.1349$ , found 306.1349.

### 2-(1-benzyl-1*H*-tetrazol-5-yl)-5-chloro-1*H*-indole (2d)

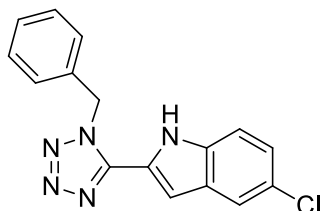

46 mg, 15% yield, colorless solid. mp 205 - 209 °C.  $^1\text{H}$  NMR (500 MHz,  $\text{DMSO-}d_6$ )  $\delta$  12.37 (s, 1H), 7.69 (d,  $J = 2.0$  Hz, 1H), 7.49 (d,  $J = 8.7$  Hz, 1H), 7.37 - 7.30 (m, 3H), 7.24 (dd,  $J = 8.8, 2.1$  Hz, 1H), 7.22 - 7.18 (m, 2H), 7.14 (d,  $J = 1.6$  Hz, 1H), 5.97 (s, 2H).  $^{13}\text{C}$  NMR (126 MHz,  $\text{DMSO-}d_6$ )  $\delta$  148.2, 135.8, 134.4, 129.2, 128.7, 128.5, 127.4, 124.9, 124.4, 121.7, 120.6, 114.0, 104.7, 51.2. HRMS (ESI)  $m/z$  calcd for  $\text{C}_{16}\text{H}_{13}\text{ClN}_5\text{O}$   $[\text{M} + \text{H}]^+ = 310.0854$ , found 310.0854.

### 2-(1-benzyl-1*H*-tetrazol-5-yl)-5,7-dimethyl-1*H*-indole (2e)

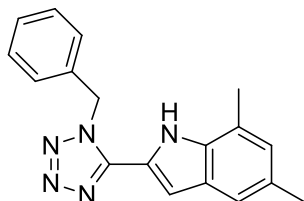

203 mg, 67% yield, colorless solid. mp 183 - 185 °C.  $^1\text{H}$  NMR (500 MHz,  $\text{CDCl}_3$ )  $\delta$  9.51 (s, 1H), 7.41 - 7.34 (m, 3H), 7.26 - 7.23 (m, 3H), 6.95 (s, 1H), 6.80 - 6.79 (m, 1H), 5.84 (s, 2H), 2.47 (s, 3H), 2.40 (s, 3H).  $^{13}\text{C}$  NMR (126 MHz,  $\text{CDCl}_3$ )  $\delta$  148.7, 135.3, 133.5, 130.9, 129.5, 128.9, 127.9, 127.7, 126.9, 121.0, 119.7, 118.7, 105.6, 51.7, 21.5, 16.9. HRMS (ESI)  $m/z$  calcd for  $\text{C}_{18}\text{H}_{18}\text{N}_5$   $[\text{M} + \text{H}]^+ = 304.1557$ , found 304.1556.

### 2-(1-benzyl-1*H*-tetrazol-5-yl)-1*H*-indole (2f)

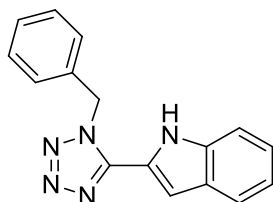

140 mg, 51% yield, white solid. mp 204 - 210 °C.  $^1\text{H}$  NMR (500 MHz,  $\text{DMSO-}d_6$ )  $\delta$  12.17 (s, 1H), 7.62 (d,  $J = 8.0$  Hz, 1H), 7.49 - 7.48 (m, 1H), 7.37 - 7.30 (m, 3H), 7.24 - 7.21 (m, 3H), 7.14 (dd,  $J = 2.3, 0.9$  Hz, 1H), 7.08 - 7.07 (m, 1H), 6.00 (s, 2H).  $^{13}\text{C}$  NMR (126 MHz,  $\text{DMSO-}d_6$ )  $\delta$  148.4, 137.2, 134.4, 129.0, 128.2, 127.5, 127.2, 124.1, 121.4,



120.3, 120.0, 112.3, 105.0, 50.9. HRMS (ESI)  $m/z$  calcd for  $C_{16}H_{14}N_5$   $[M + H]^+$  = 276.1244, found 276.1243.

**2-(1-benzyl-1*H*-tetrazol-5-yl)-5-isopropyl-1*H*-indole (2g)**

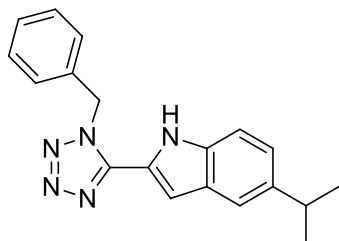

226 mg, 71% yield, white solid. mp 202 - 206 °C.  $^1H$  NMR (500 MHz,  $CDCl_3$ )  $\delta$  9.86 (s, 1H), 7.50 (d,  $J$  = 8.5 Hz, 1H), 7.46 (s, 1H), 7.42 - 7.37 (m, 3H), 7.26 - 7.23 (m, 3H), 6.83 (d,  $J$  = 1.4 Hz, 1H), 5.87 (s, 2H), 3.04 - 2.97 (m, 1H), 1.29 (d,  $J$  = 6.9 Hz, 6H).  $^{13}C$  NMR (126 MHz,  $CDCl_3$ )  $\delta$  148.7, 142.0, 135.8, 133.5, 129.5, 128.9, 128.2, 126.9, 125.1, 120.0, 118.3, 112.0, 105.4, 51.8, 34.2, 24.6. HRMS (ESI)  $m/z$  calcd for  $C_{19}H_{20}N_5$   $[M + H]^+$  = 318.1713, found 318.1712.

**2-(1-benzyl-1*H*-tetrazol-5-yl)-5,6-dimethoxy-1*H*-indole (2h-1) and 2-(1-benzyl-1*H*-tetrazol-5-yl)-4,5-dimethoxy-1*H*-indole (2h-2)**

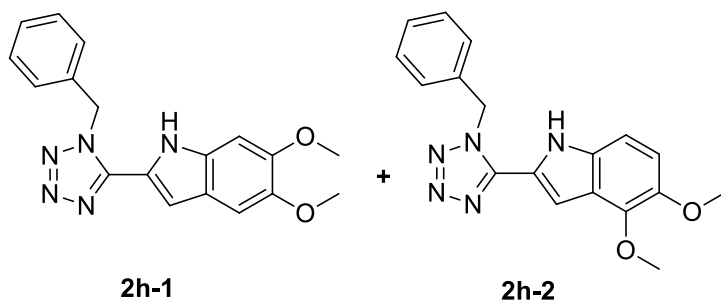

(**2h-1** : **2h-2** = 9 : 1)

Mixture of isomers was formed in 5:1 ratio, but **2h** was obtained as the mixture of **2h-1** and **2h-2** in 9:1 ratio, after washing steps with chloroform. **2h-1 + 2h-2**: 324 mg, 97% yield (both isomers before washing steps), cream white solid.  $^1H$  NMR (500 MHz,  $(CD_3)_2CO$ )  $\delta$  10.89 (s, 0.82H), 10.81 (s, 0.10H), 7.42 - 7.37 (m, 2H), 7.35 - 7.32 (m, 1H), 7.30 - 7.29 (m, 2H), 7.12 (s, 1H), 7.08 (s, 0.92H), 6.99 (s, 0.11H), 6.969 - 6.965 (m, 0.84H), 6.942 - 6.938 (m, 0.11H), 5.99 (s, 2H), 3.89 (d,  $J$  = 5.2 Hz, 0.43H), 3.84 (s, 2.74H), 3.80 (s, 3H).  $^{13}C$  NMR (126 MHz,  $(CD_3)_2CO$ )  $\delta$  150.8, 149.5, 147.4, 135.7, 133.4, 129.94, 129.91, 129.2, 128.0, 127.9, 122.1, 119.4, 105.9, 103.5, 95.5, 56.4, 56.2, 51.9. HRMS (ESI)  $m/z$  calcd for  $C_{18}H_{18}N_5O_2$   $[M + H]^+$  = 336.1455, found 336.1455.

## 2-(1-benzyl-1*H*-tetrazol-5-yl)-5,7-dimethyl-1*H*-indole (2i)

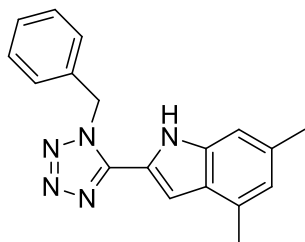

261 mg, 86% yield, white solid. mp 203 - 206 °C. <sup>1</sup>H NMR (500 MHz, DMSO-*d*<sub>6</sub>) δ 11.98 (s, 1H), 7.37 - 7.35 (m, 2H), 7.32 - 7.29 (m, 1H), 7.24 (d, *J* = 7.3 Hz, 2H), 7.11 - 7.10 (m, 1H), 7.08 (s, 1H), 6.70 (s, 1H), 6.01 (s, 2H), 2.41 (s, 3H), 2.34 (s, 3H). <sup>13</sup>C NMR (126 MHz, DMSO-*d*<sub>6</sub>) δ 148.5, 137.6, 134.6, 133.7, 130.0, 128.9, 128.3, 127.4, 127.3, 125.8, 122.3, 118.7, 109.4, 103.9, 51.0, 21.5, 18.3. HRMS (ESI) *m/z* calcd for C<sub>18</sub>H<sub>18</sub>N<sub>5</sub> [*M* + *H*]<sup>+</sup> = 304.1557, found 304.1556.

## 2-(1-benzyl-1*H*-tetrazol-5-yl)-6,7,8,9-tetrahydro-1*H*-benzo[*g*]indole (2j)

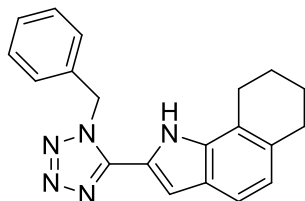

322 mg, 98% yield, white solid. mp 173 - 177 °C. <sup>1</sup>H NMR (500 MHz, (CD<sub>3</sub>)<sub>2</sub>CO) δ 10.58 (s, 1H), 7.40 - 7.31 (m, 4H), 7.29 - 7.27 (m, 2H), 7.04 (d, *J* = 2.1 Hz, 1H), 6.84 (d, *J* = 8.2 Hz, 1H), 5.99 (s, 2H), 3.03 (t, *J* = 6.3 Hz, 2H), 2.83 (t, *J* = 6.1 Hz, 2H), 1.91 - 1.88 (m, 2H), 1.85 - 1.83 (m, 2H). <sup>13</sup>C NMR (126 MHz, (CD<sub>3</sub>)<sub>2</sub>CO) δ 149.6, 137.9, 135.7, 133.8, 130.0, 129.3, 128.1, 126.8, 123.8, 121.5, 121.4, 120.6, 119.5, 106.8, 52.1, 25.0, 24.1, 23.6. HRMS (ESI) *m/z* calcd for C<sub>20</sub>H<sub>20</sub>N<sub>5</sub> [*M* + *H*]<sup>+</sup> = 330.1713, found 330.1713.

## 4,5,6-trimethoxy-2-(1-phenyl-1*H*-tetrazol-5-yl)-1*H*-indole (2k)

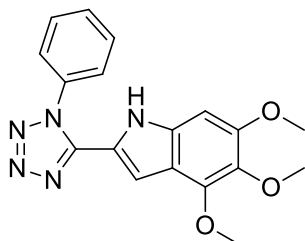

319 mg, 91% yield, yellow solid. mp 208 - 211 °C. <sup>1</sup>H NMR (500 MHz, DMSO-*d*<sub>6</sub>) δ 12.07 (d, *J* = 1.8 Hz, 1H), 7.78 - 7.70 (m, 5H), 6.71 (s, 1H), 6.00 - 5.99 (m, 1H), 3.79

(s, 3H), 3.75 (s, 3H), 3.64 (s, 3H).  $^{13}\text{C}$  NMR (126 MHz,  $\text{DMSO-}d_6$ )  $\delta$  152.8, 148.4, 145.1, 135.4, 134.5, 134.2, 131.4, 130.2, 126.7, 118.2, 114.8, 102.5, 89.6, 60.9, 60.2, 55.8. HRMS (ESI)  $m/z$  calcd for  $\text{C}_{18}\text{H}_{18}\text{N}_5\text{O}_3$   $[\text{M} + \text{H}]^+ = 352.1404$ , found 352.1403.

### 2-(1-(4-chlorophenyl)-1H-tetrazol-5-yl)-4,5,6-trimethoxy-1H-indole (2l)

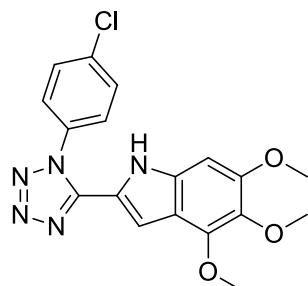

312 mg, 81% yield, yellow solid. mp 250 - 255 °C.  $^1\text{H}$  NMR (500 MHz,  $\text{DMSO-}d_6$ )  $\delta$  12.05 (s, 1H), 7.81 - 7.78 (m, 4H), 6.71 (d,  $J = 0.5$  Hz, 1H), 6.10 (s, 1H), 3.80 (s, 6H), 3.65 (s, 3H).  $^{13}\text{C}$  NMR (126 MHz,  $\text{DMSO-}d_6$ )  $\delta$  152.9, 148.4, 145.2, 135.9, 135.4, 134.5, 133.1, 130.2, 128.6, 118.1, 114.8, 102.6, 89.6, 60.9, 60.2, 55.8. HRMS (ESI)  $m/z$  calcd for  $\text{C}_{18}\text{H}_{17}\text{ClN}_5\text{O}_3$   $[\text{M} + \text{H}]^+ = 386.1014$ , found 386.1013.

### 2-(1-cyclohexyl-1H-tetrazol-5-yl)-4,5,6-trimethoxy-1H-indole (2m)

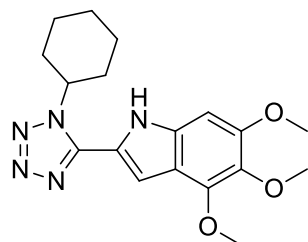

275 mg, 77% yield, white solid. mp 215 - 223 °C.  $^1\text{H}$  NMR (500 MHz,  $\text{CDCl}_3$ )  $\delta$  11.13 (s, 1H), 7.12 (s, 1H), 6.98 (d,  $J = 2.0$  Hz, 1H), 4.71 (tt,  $J = 11.5, 3.7$  Hz, 1H), 4.15 (s, 3H), 3.94 (s, 3H), 3.89 (s, 3H), 2.27 - 2.24 (m, 2H), 2.17 - 2.09 (m, 2H), 2.06 - 2.03 (m, 2H), 1.86 - 1.83 (m, 1H), 1.60 - 1.52 (m, 2H), 1.45 - 1.39 (m, 1H).  $^{13}\text{C}$  NMR (126 MHz,  $\text{CDCl}_3$ )  $\delta$  153.8, 147.7, 145.8, 136.5, 134.7, 118.5, 116.3, 102.1, 90.5, 61.6, 61.2, 59.1, 56.3, 32.7, 25.4, 25.1. HRMS (ESI)  $m/z$  calcd for  $\text{C}_{18}\text{H}_{24}\text{N}_5\text{O}_3$   $[\text{M} + \text{H}]^+ = 358.1874$ , found 358.1873.

#### 4,5,6-trimethoxy-2-(1-(2-(trifluoromethyl)phenyl)-1H-tetrazol-5-yl)-1H-indole (2n)

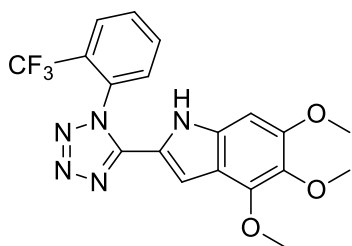

281 mg, 67% yield, yellow solid. mp 247 - 250 °C. <sup>1</sup>H NMR (500 MHz, DMSO-*d*<sub>6</sub>) δ 12.18 (d, *J* = 1.8 Hz, 1H), 8.20 (d, *J* = 7.6 Hz, 1H), 8.09 - 8.06 (m, 3H), 6.69 (s, 1H), 5.68 (d, *J* = 2.2 Hz, 1H), 3.79 (s, 3H), 3.72 (s, 3H), 3.63 (s, 3H). <sup>13</sup>C NMR (126 MHz, DMSO-*d*<sub>6</sub>) δ 153.1, 149.5, 145.1, 135.4, 135.0, 134.6, 133.0, 131.2, 130.7, 128.4, 125.8, 123.6, 121.4, 117.8, 114.9, 102.4, 89.6, 60.9, 60.1, 55.9. <sup>19</sup>F NMR (471 MHz, DMSO-*d*<sub>6</sub>) δ -58.32, -59.06. HRMS (ESI) *m/z* calcd for C<sub>19</sub>H<sub>17</sub>F<sub>3</sub>N<sub>5</sub>O<sub>3</sub> [M + H]<sup>+</sup> = 420.1277, found 420.1277.

#### 4,5,6-trimethoxy-2-(1-(*o*-tolyl)-1H-tetrazol-5-yl)-1H-indole (2o)

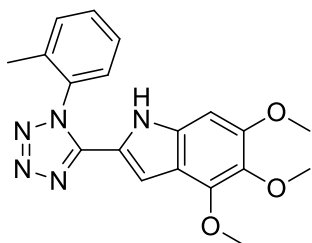

281 mg, 84% yield, yellow solid. mp 173 - 180 °C. <sup>1</sup>H NMR (500 MHz, DMSO-*d*<sub>6</sub>) δ 12.15 (s, 1H), 7.69 (td, *J* = 7.5, 1.3 Hz, 1H), 7.62 (t, *J* = 7.4 Hz, 2H), 7.56 - 7.53 (m, 1H), 6.70 (s, 1H), 5.78 (d, *J* = 1.8 Hz, 1H), 3.79 (s, 3H), 3.72 (s, 3H), 3.63 (s, 3H), 1.92 (s, 3H). <sup>13</sup>C NMR (126 MHz, DMSO-*d*<sub>6</sub>) δ 153.0, 148.6, 145.1, 135.4, 135.0, 134.6, 133.3, 131.8, 127.9, 127.7, 118.1, 114.9, 101.9, 89.6, 60.9, 60.1, 55.8, 16.5. HRMS (ESI) *m/z* calcd for C<sub>19</sub>H<sub>20</sub>N<sub>5</sub>O<sub>3</sub> [M + H]<sup>+</sup> = 366.1561, found 366.1557.

#### 2-(1-(4-chlorophenyl)-1H-tetrazol-5-yl)-5,7-dimethyl-1H-indole (2p)

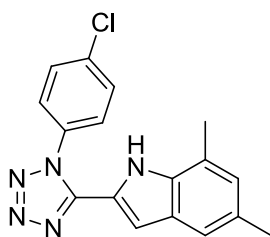

229 mg, 71% yield, cream white solid. mp 152 - 156 °C. <sup>1</sup>H NMR (500 MHz, CDCl<sub>3</sub>) δ 9.26 (s, 1H), 7.66 - 7.63 (m, 2H), 7.54 - 7.51 (m, 2H), 7.15 (s, 1H), 6.96 (s, 1H), 6.25

(d,  $J = 2.2$  Hz, 1H), 2.51 (s, 3H), 2.38 (s, 3H).  $^{13}\text{C}$  NMR (126 MHz,  $\text{CDCl}_3$ )  $\delta$  148.7, 137.6, 135.2, 132.9, 131.0, 130.6, 128.0, 127.7, 120.9, 119.6, 118.8, 106.0, 21.5, 16.8. HRMS (ESI)  $m/z$  calcd for  $\text{C}_{17}\text{H}_{15}\text{ClN}_5$   $[\text{M} + \text{H}]^+ = 324.1010$ , found 324.1010.

### 2-(1-cyclohexyl-1H-tetrazol-5-yl)-5,7-dimethyl-1H-indole (2q)

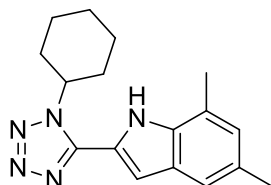

221 mg, 75% yield, colorless white solid. mp 133 - 136 °C.  $^1\text{H}$  NMR (500 MHz,  $\text{DMSO}-d_6$ )  $\delta$  11.80 (s, 1H), 7.28 (s, 1H), 7.03 (d,  $J = 2.0$  Hz, 1H), 6.87 (s, 1H), 4.73 (tt,  $J = 11.4$ , 3.7 Hz, 1H), 2.49 (s, 3H), 2.34 (s, 3H), 2.10 (d,  $J = 11.9$  Hz, 2H), 1.90 - 1.83 (m, 4H), 1.68 (d,  $J = 12.9$  Hz, 1H), 1.52 - 1.44 (m, 2H), 1.31 - 1.26 (m, 1H).  $^{13}\text{C}$  NMR (126 MHz,  $\text{DMSO}-d_6$ )  $\delta$  147.8, 129.1, 127.8, 126.3, 121.4, 120.2, 118.1, 104.8, 57.8, 32.4, 24.61, 24.57, 21.1, 17.1. HRMS (ESI)  $m/z$  calcd for  $\text{C}_{17}\text{H}_{22}\text{N}_5$   $[\text{M} + \text{H}]^+ = 296.1870$ , found 296.1869.

### 2-(1-(4-chlorophenyl)-1H-tetrazol-5-yl)-1H-indole (2r)

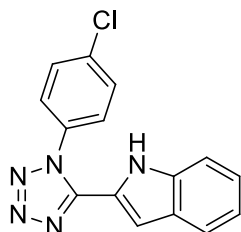

151 mg, 51% yield, brown solid. mp 244 - 248 °C.  $^1\text{H}$  NMR (500 MHz,  $\text{DMSO}-d_6$ )  $\delta$  12.23 (s, 1H), 7.82 - 7.80 (m, 4H), 7.53 (d,  $J = 8.0$  Hz, 1H), 7.48 (dd,  $J = 8.3$ , 0.7 Hz, 1H), 7.23 - 7.20 (m, 1H), 7.03 - 7.00 (m, 1H), 6.20 (dd,  $J = 2.0$ , 0.7 Hz, 1H).  $^{13}\text{C}$  NMR (126 MHz,  $\text{DMSO}-d_6$ )  $\delta$  148.6, 137.2, 136.0, 133.0, 130.3, 128.6, 127.2, 124.2, 121.4, 120.3, 120.1, 112.2, 104.8. HRMS (ESI)  $m/z$  calcd for  $\text{C}_{15}\text{H}_{11}\text{ClN}_5$   $[\text{M} + \text{H}]^+ = 296.0697$ , found 296.0698.

### 2-(1-cyclohexyl-1H-tetrazol-5-yl)-1H-indole (2s)

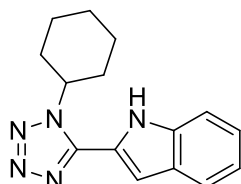

176 mg, 66% yield, colorless solid. mp 239 - 245 °C.  $^1\text{H}$  NMR (500 MHz,  $\text{DMSO-}d_6$ )  $\delta$  12.12 (s, 1H), 7.71 (d,  $J = 8.0$  Hz, 1H), 7.51 (d,  $J = 8.2$  Hz, 1H), 7.29 - 7.23 (m, 1H), 7.19 (s, 1H), 7.10 (t,  $J = 7.3$  Hz, 1H), 4.85 - 4.76 (m, 1H), 2.15 (d,  $J = 11.5$  Hz, 2H), 1.94 - 1.85 (m, 4H), 1.70 (d,  $J = 13.0$  Hz, 1H), 1.58 - 1.50 (m, 2H), 1.31 - 1.28 (m, 1H).  $^{13}\text{C}$  NMR (126 MHz,  $\text{DMSO-}d_6$ )  $\delta$  147.6, 137.2, 127.6, 123.9, 121.4, 120.4, 120.2, 112.2, 104.4, 57.8, 32.3, 24.6, 24.5. HRMS (ESI)  $m/z$  calcd for  $\text{C}_{15}\text{H}_{18}\text{N}_5$   $[\text{M} + \text{H}]^+ = 268.1557$ , found 268.1556.

### 2-(1-(4-chlorobenzyl)-1H-tetrazol-5-yl)-6-methoxy-1H-indole (2t-1)

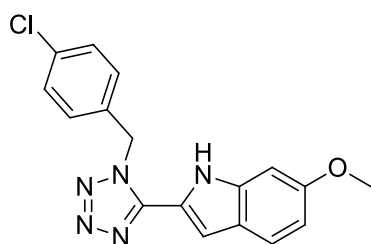

Mixture of isomers was formed in 9:1 ratio, but **2t-1** was obtained as only one isomer after washing with ether. 298 mg, 88% yield (both isomers before washing step), yellow solid. mp 207 - 211 °C.  $^1\text{H}$  NMR (500 MHz,  $\text{DMSO-}d_6$ )  $\delta$  11.99 (s, 1H), 7.50 (d,  $J = 8.7$  Hz, 1H), 7.46 - 7.42 (m, 2H), 7.27 - 7.25 (m, 2H), 7.07 (d,  $J = 1.5$  Hz, 1H), 6.93 (d,  $J = 2.2$  Hz, 1H), 6.73 (dd,  $J = 8.7, 2.2$  Hz, 1H), 5.97 (s, 2H), 3.78 (s, 3H).  $^{13}\text{C}$  NMR (126 MHz,  $\text{DMSO-}d_6$ )  $\delta$  157.6, 148.3, 138.4, 133.4, 132.9, 129.2, 129.0, 122.2, 121.9, 118.6, 111.6, 105.3, 94.0, 55.2, 50.2. HRMS (ESI)  $m/z$  calcd for  $\text{C}_{17}\text{H}_{15}\text{ClN}_5\text{O}$   $[\text{M} + \text{H}]^+ = 340.0960$ , found 340.0958.

### 2-(1-benzyl-1H-tetrazol-5-yl)-6-methyl-1H-indole (2u-1) and 2-(1-benzyl-1H-tetrazol-5-yl)-4-methyl-1H-indole (2u-2)

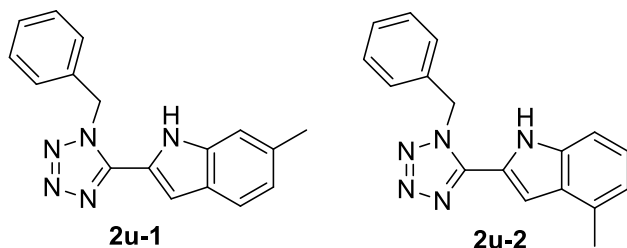

(**2u-1** : **2u-2** = 3:2)

The mixture of **2u-1** + **2u-2** was formed in 3:2 ratio. 277 mg, 96% yield, white solid.  $^1\text{H}$  NMR (500 MHz,  $\text{CDCl}_3$ )  $\delta$  10.24 (s, 0.37H), 10.09 (s, 0.57H), 7.50 (d,  $J = 8.2$  Hz, 0.60H), 7.45 (d,  $J = 8.3$  Hz, 0.43H), 7.43 - 7.36 (m, 3H), 7.30 - 7.22 (m, 2H), 6.99 (d,  $J = 8.1$  Hz, 0.57H), 6.95 (d,  $J = 7.0$  Hz, 0.40H), 6.89 (s, 0.83H), 6.84 (s, 1.24H), 5.90 (s, 0.83H), 5.86 (s, 1.24H), 2.51 (s, 1.16H), 2.48 (s, 1.77H).  $^{13}\text{C}$  NMR (126 MHz,  $\text{CDCl}_3$ )  $\delta$  148.7, 137.7, 137.0, 135.6, 133.54, 133.47, 131.2, 129.5, 129.0, 128.9, 128.2, 127.1, 127.0, 125.9, 125.5, 123.2, 121.3, 121.1, 119.4, 119.3, 112.0, 109.9, 105.5, 104.3, 51.9, 51.8, 22.1, 18.7. HRMS (ESI)  $m/z$  calcd for  $\text{C}_{17}\text{H}_{16}\text{N}_5$   $[\text{M} + \text{H}]^+ = 290.1400$ , found 290.1399.

### 2-(1-benzyl-1H-tetrazol-5-yl)-6-fluoro-1H-indole (2v-1)

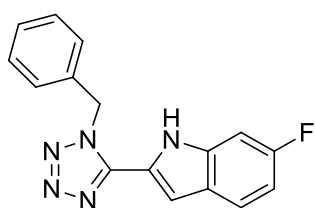

Mixture of isomers was formed in 6:5 ratio, but **2v-1** was obtained as only one isomer after washing with dichloromethane. 269 mg, 92% yield (both isomers before washing step), brown solid. mp 206 - 207 °C.  $^1\text{H}$  NMR (500 MHz,  $\text{DMSO}-d_6$ )  $\delta$  12.27 (s, 1H), 7.65 (dd,  $J = 8.8, 5.5$  Hz, 1H), 7.38 - 7.35 (m, 2H), 7.32 - 7.29 (m, 1H), 7.23 - 7.19 (m, 4H), 6.97 - 6.93 (m, 1H), 5.98 (s, 2H).  $^{13}\text{C}$  NMR (126 MHz,  $\text{DMSO}-d_6$ )  $\delta$  160.3 (d,  $^1J_{\text{C-F}} = 239.0$  Hz), 148.2, 137.3 (d,  $^3J_{\text{C-F}} = 13.2$  Hz), 134.4, 129.0, 128.3, 127.2, 124.4, 123.0 (d,  $^3J_{\text{C-F}} = 10.3$  Hz), 120.8, 109.4 (d,  $^2J_{\text{C-F}} = 25.0$  Hz), 105.2, 99.6, 97.9 (d,  $^2J_{\text{C-F}} = 25.9$  Hz), 51.0.  $^{19}\text{F}$  NMR (471 MHz,  $\text{DMSO}-d_6$ )  $\delta$  -117.47. HRMS (ESI)  $m/z$  calcd for  $\text{C}_{16}\text{H}_{13}\text{FN}_5$   $[\text{M} + \text{H}]^+ = 294.1150$ , found 294.1149.

### 2-(1-benzyl-1H-tetrazol-5-yl)-6-chloro-1H-indole (2w-1) and 2-(1-benzyl-1H-tetrazol-5-yl)-4-chloro-1H-indole (2w-2)

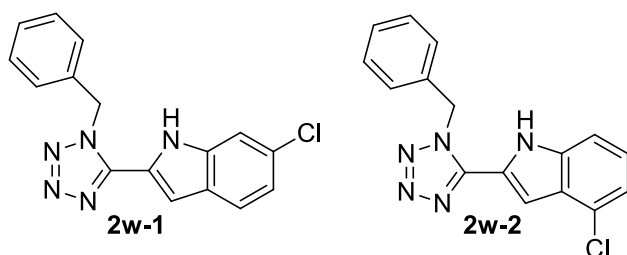

(**2w-1** : **2w-2** = 4:1)

Mixture of isomers was formed in 5:4 ratio, but **2w** was obtained as a mixture of **2w-1** and **2w-2** (4:1 ratio) after washing with dichloromethane. **2w-1** + **2w-2**: 266 mg, 86% yield (both isomers before washing steps), brown solid. <sup>1</sup>H NMR (500 MHz, DMSO-*d*<sub>6</sub>) δ 12.56 (s, 0.24H), 12.34 (s, 0.87H), 7.65 (d, *J* = 8.5 Hz, 0.79H), 7.50 (s, 0.79H), 7.46 (d, *J* = 8.2 Hz, 0.23H), 7.39 - 7.29 (m, 3H), 7.25 - 7.21 (m, 2H), 7.19 (d, *J* = 1.9 Hz, 0.76H), 7.15 (d, *J* = 7.5 Hz, 0.18H), 7.09 (dd, *J* = 8.5, 1.8 Hz, 1H), 6.03 (s, 0.36H), 5.99 (s, 1.58H). <sup>13</sup>C NMR (126 MHz, DMSO-*d*<sub>6</sub>) δ 148.1, 137.5, 134.3, 129.0, 128.8, 128.3, 127.23, 127.19, 126.3, 123.0, 121.1, 120.8, 111.7, 105.1, 99.6, 51.0. HRMS (ESI) *m/z* calcd for C<sub>16</sub>H<sub>13</sub>ClN<sub>5</sub> [M + H]<sup>+</sup> = 310.0854, found 310.0854.

**2-(1-benzyl-1*H*-tetrazol-5-yl)-6-bromo-1*H*-indole (2x-1) and 2-(1-benzyl-1*H*-tetrazol-5-yl)-4-bromo-1*H*-indole (2x-2)**

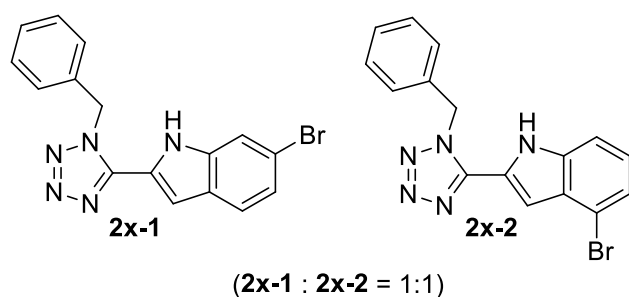

Mixture of isomers was formed in 2:1 ratio, but **2x** was obtained as a mixture of **2x-1** and **2x-2** in 1:1 ratio after washing with dichloromethane. **2x-1** + **2x-2**: 332 mg, 94% yield (both isomers before washing step), brown solid. <sup>1</sup>H NMR (500 MHz, DMSO-*d*<sub>6</sub>) δ 12.58 (s, 0.49H), 12.34 (s, 0.50H), 7.65 (s, 0.45H), 7.60 (d, *J* = 8.5 Hz, 0.47H), 7.50 (d, *J* = 8.2 Hz, 0.51H), 7.40 - 7.30 (m, 3.43H), 7.23 - 7.16 (m, 3.42H), 6.99 (s, 0.48H), 6.03 (s, 1H), 5.99 (s, 1H). <sup>13</sup>C NMR (126 MHz, DMSO-*d*<sub>6</sub>) δ 148.1, 138.0, 137.5, 134.4, 134.3, 129.04, 129.01, 128.4, 128.3, 128.0, 127.24, 127.19, 126.5, 125.3, 123.34, 123.28, 123.0, 121.00, 120.97, 116.9, 114.7, 114.2, 111.9, 105.2, 104.7, 51.2, 51.0. HRMS (ESI) *m/z* calcd for C<sub>16</sub>H<sub>13</sub>BrN<sub>5</sub> [M + H]<sup>+</sup> = 354.0349, found 354.0348.

**2-(1-benzyl-1*H*-tetrazol-5-yl)-6-isopropyl-1*H*-indole (2y)**

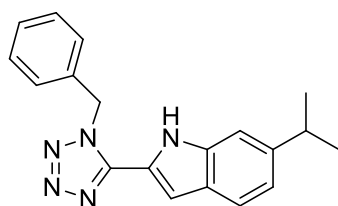



Mixture of isomers was formed in 4:1 ratio, but **2y** was obtained as only one isomer after washing with ether. 273 mg, 86% yield (both isomers before washing step), white solid. mp 169 - 174 °C. <sup>1</sup>H NMR (500 MHz, CDCl<sub>3</sub>) δ 9.72 (s, 1H), 7.55 (d, *J* = 8.3 Hz, 1H), 7.41 - 7.35 (m, 4H), 7.26 - 7.24 (m, 2H), 7.07 (dd, *J* = 8.3, 1.4 Hz, 1H), 6.84 (d, *J* = 1.4 Hz, 1H), 5.87 (s, 2H), 3.08 - 3.00 (m, 1H), 1.31 (d, *J* = 6.9 Hz, 6H). <sup>13</sup>C NMR (126 MHz, CDCl<sub>3</sub>) δ 148.7, 147.0, 137.5, 133.5, 129.5, 128.9, 127.0, 126.3, 121.5, 120.9, 119.6, 109.1, 105.4, 51.8, 34.7, 24.4. HRMS (ESI) *m/z* calcd for C<sub>19</sub>H<sub>20</sub>N<sub>5</sub> [M + H]<sup>+</sup> = 318.1713, found 318.1714.

### 2-(1*H*-tetrazol-5-yl)-1*H*-indole (3a)

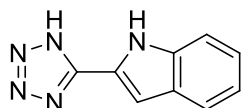

175 mg, 95% yield, yellow solid. Spectral data are in accordance to reported data. <sup>[3]</sup> <sup>1</sup>H NMR (500 MHz, DMSO-*d*<sub>6</sub>) δ 12.10 (s, 1H), 7.65 (d, *J* = 8.0 Hz, 1H), 7.47 (d, *J* = 8.2 Hz, 1H), 7.21 (t, *J* = 7.6 Hz, 1H), 7.14 - 7.13 (m, 1H), 7.07 (t, *J* = 7.5 Hz, 1H).

### 6-isopropyl-2-(1*H*-tetrazol-5-yl)-1*H*-indole (3b)

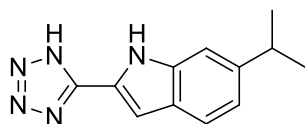

44 mg, 98% yield, white solid. Spectral data are in accordance to reported data. <sup>[4]</sup> <sup>1</sup>H NMR (500 MHz, DMSO-*d*<sub>6</sub>) δ 11.94 (s, 1H), 7.55 (d, *J* = 8.2 Hz, 1H), 7.29 (s, 1H), 7.07 (d, *J* = 1.5 Hz, 1H), 6.99 (dd, *J* = 8.2, 1.5 Hz, 1H), 2.97 (dt, *J* = 13.8, 6.9 Hz, 1H), 1.24 (d, *J* = 6.9 Hz, 6H). <sup>13</sup>C NMR (126 MHz, DMSO-*d*<sub>6</sub>) δ 144.2, 137.8, 125.8, 121.8, 120.9, 119.6, 109.0, 103.3, 33.8, 24.3.

**2-(1-benzyl-1*H*-tetrazol-5-yl)-4,5,6-trimethoxy-1*H*-indole-7-carbaldehyde (4) and 2-(1-benzyl-1*H*-tetrazol-5-yl)-4,5,6-trimethoxy-1*H*-indole-3,7-dicarbaldehyde (4')**

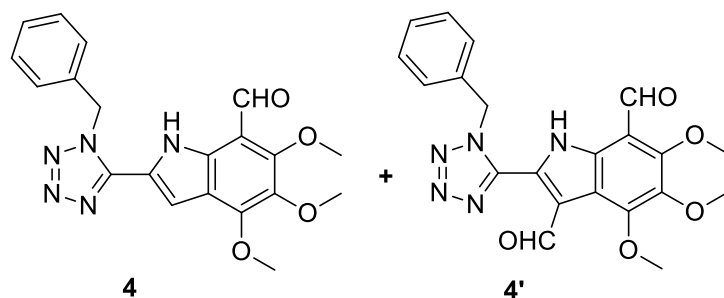

**4 : 4' = 1:1**

The mixture of **4** and **4'** was formed in 1:1 ratio. 374 mg, 94% yield, brown solid. <sup>1</sup>H NMR (500 MHz, DMSO-*d*<sub>6</sub>) δ 13.00 (s, 1H), 11.46 (s, 1H), 10.32 (s, 1H), 10.29 (s, 1H), 10.24 (s, 1H), 7.34 - 7.26 (m, 4H), 7.24 - 7.22 (m, 3H), 7.19 - 7.17 (m, 2H), 7.14 - 7.12 (m, 2H), 5.95 (s, 2H), 5.43 (s, 2H), 4.22 (s, 3H), 4.18 (s, 3H), 4.06 (s, 3H), 4.01 (s, 3H), 3.89 (s, 3H), 3.78 (s, 3H). <sup>13</sup>C NMR (126 MHz, DMSO-*d*<sub>6</sub>) δ 188.5, 188.4, 186.1, 157.6, 153.7, 153.3, 148.0, 147.8, 140.1, 136.8, 134.3, 133.9, 132.5, 128.9, 128.4, 128.3, 128.3, 128.1, 127.4, 120.5, 118.3, 116.3, 115.6, 111.0, 108.3, 104.8, 63.3, 63.2, 61.5, 61.2, 61.2, 60.4, 51.1, 50.9.

**2-(1-benzyl-1*H*-tetrazol-5-yl)-4,5,6-trimethoxy-1*H*-indole-7-carbaldehyde (4)**

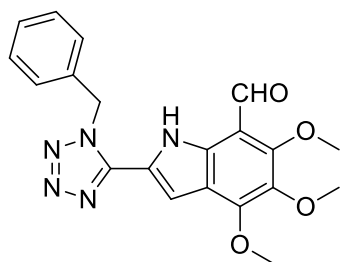

369 mg, 92% yield, brown solid. mp 198 - 199 °C. <sup>1</sup>H NMR (500 MHz, DMSO-*d*<sub>6</sub>) δ 11.47 (s, 1H), 10.25 (s, 1H), 7.34 - 7.29 (m, 4H), 7.19 - 7.17 (m, 2H), 5.95 (s, 2H), 4.22 (s, 3H), 4.02 (s, 3H), 3.78 (s, 3H). <sup>13</sup>C NMR (126 MHz, DMSO-*d*<sub>6</sub>) δ 188.4, 157.6, 153.7, 147.8, 136.8, 134.3, 132.5, 128.9, 128.3, 127.4, 120.5, 115.6, 108.4, 104.8, 63.2, 61.2, 60.4, 51.1. HRMS (ESI) *m/z* calcd for C<sub>20</sub>H<sub>20</sub>N<sub>5</sub>O<sub>4</sub> [M + H]<sup>+</sup> = 394.1510, found 394.1505.

**2-(1-benzyl-1H-tetrazol-5-yl)-1H-indole-3-carbaldehyde (5)**

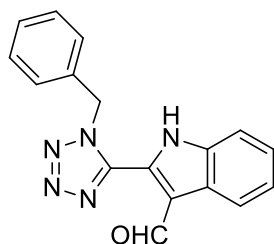

291 mg, 96% yield, brown oil.  $^1\text{H}$  NMR (500 MHz,  $\text{CDCl}_3$ )  $\delta$  10.92 (s, 1H), 10.10 (s, 1H), 8.23 - 8.21 (m, 1H), 7.50 - 7.48 (m, 1H), 7.41 - 7.35 (m, 2H), 7.27 - 7.21 (m, 3H), 7.06 - 7.04 (m, 2H), 5.64 (s, 2H).  $^{13}\text{C}$  NMR (126 MHz,  $\text{CDCl}_3$ )  $\delta$  184.8, 147.6, 136.9, 133.0, 129.4, 129.3, 128.1, 126.1, 125.9, 125.2, 124.1, 120.9, 118.4, 112.8, 52.8. HRMS (ESI)  $m/z$  calcd for  $\text{C}_{17}\text{H}_{14}\text{N}_5\text{O}$  [ $\text{M} + \text{H}$ ] $^+$  = 304.1193, found 304.1192.

**1-(2-(1-benzyl-1H-tetrazol-5-yl)-4,5,6-trimethoxy-1H-indol-7-yl)-1-(1-(4-chlorobenzyl)-1H-tetrazol-5-yl)-N-(2-methylbenzyl)methanamine (6)**

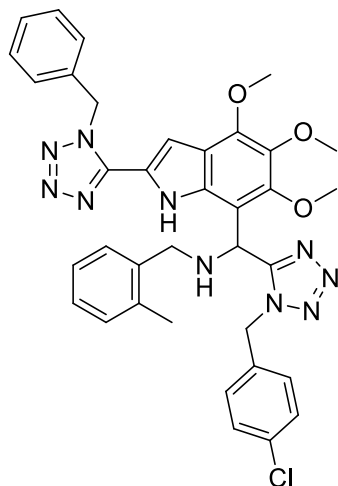

449 mg, 65% yield, white solid. mp 102 - 105 °C.  $^1\text{H}$  NMR (500 MHz,  $\text{CDCl}_3$ )  $\delta$  10.76 (s, 1H), 7.37 - 7.30 (m, 3H), 7.22 - 7.21 (m, 2H), 7.17 - 7.15 (m, 3H), 7.10 - 7.09 (m, 2H), 7.01 (d,  $J$  = 7.3 Hz, 1H), 6.90 (d,  $J$  = 2.3 Hz, 1H), 6.86 (d,  $J$  = 8.3 Hz, 2H), 5.90 - 5.80 (m, 3H), 5.50, 5.40 (ABq,  $J$  = 15.5 Hz, 2H), 4.01 (s, 3H), 3.79 (s, 3H), 3.78 (s, 3H), 3.69, 3.58 (ABq,  $J$  = 13.6 Hz, 2H), 2.32 (s, 1H), 2.10 (s, 3H).  $^{13}\text{C}$  NMR (126 MHz,  $\text{CDCl}_3$ )  $\delta$  155.4, 150.1, 148.2, 147.2, 138.9, 136.7, 134.7, 133.6, 132.4, 132.2, 130.8, 129.3, 129.2, 128.8, 128.6, 128.5, 127.7, 126.9, 126.1, 120.3, 119.0, 103.5, 62.0, 61.4, 60.9, 51.6, 50.0, 49.2, 48.7, 18.9. HRMS (ESI)  $m/z$  calcd for  $\text{C}_{36}\text{H}_{35}\text{ClN}_{10}\text{NaO}_3$  [ $\text{M} + \text{Na}$ ] $^+$  = 713.2474, found 713.2477.

**2-(2-(1-benzyl-1H-tetrazol-5-yl)-4,5,6-trimethoxy-1H-indol-7-yl)-N-(4-chlorobenzyl)-2-(N-(3,5-difluorobenzyl)acetamido)acetamide (7)**

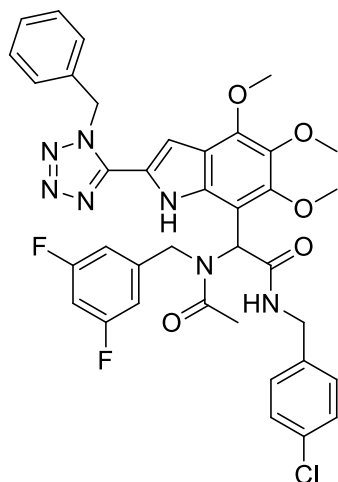

445 mg, 61% yield, brown solid. mp 154 - 158 °C. *Mixture of rotamers observed.* <sup>1</sup>H NMR (500 MHz, DMSO-*d*<sub>6</sub>) δ 11.38 (s, 0.35H), 11.04 (s, 0.64H), 9.04 (s, 0.37H), 8.77 (s, 0.64H), 7.38 - 7.30 (m, 3.46H), 7.28 - 7.26 (m, 4H), 7.21 - 7.19 (m, 2H), 7.06 (s, 0.65H), 7.00 (s, 0.33H), 6.74 (t, *J* = 9.0 Hz, 0.58H), 6.54 (s, 0.38H), 6.34 (d, *J* = 6.3 Hz, 1.2H), 6.10 (d, *J* = 7.2 Hz, 0.79H), 5.99 - 5.97 (m, 2.35H), 5.04 (d, *J* = 16.4 Hz, 0.33H), 4.75, 4.57 (ABq, *J* = 18.5 Hz, 1.24H), 4.49 - 4.37 (m, 1H), 4.30 - 4.24 (m, 1.4H), 4.04 - 4.01 (m, 0.5H), 3.87 - 3.84 (m, 3H), 3.77 - 3.74 (m, 3H), 3.63 (s, 1.18H), 3.51 (s, 2H), 2.27 (s, 1H), 2.00 (s, 2H). <sup>13</sup>C NMR (126 MHz, DMSO-*d*<sub>6</sub>) δ 171.8, 162.9, 161.2, 160.9, 151.3, 147.8, 146.4, 143.1, 138.6, 138.3, 138.1, 134.5, 131.5, 131.2, 129.5, 129.2, 129.1, 129.0, 128.3, 128.2, 128.0, 127.2, 119.7, 117.6, 108.3, 103.5, 101.6, 60.8, 60.6, 60.5, 59.8, 57.3, 54.5, 51.0, 49.3, 46.4, 42.1, 41.9, 22.1, 22.0, 20.8, 14.1. <sup>19</sup>F NMR (471 MHz, DMSO-*d*<sub>6</sub>) δ -110.29, -111.51. HRMS (ESI) *m/z* calcd for C<sub>37</sub>H<sub>35</sub>ClF<sub>2</sub>N<sub>7</sub>O<sub>5</sub> [M + H]<sup>+</sup> = 730.2351, found 730.2352.

**1-(2-(1-benzyl-1H-tetrazol-5-yl)-1H-indol-3-yl)-1-(1-(4-chlorobenzyl)-1H-tetrazol-5-yl)-N-(2-methylbenzyl)methanamine (8)**

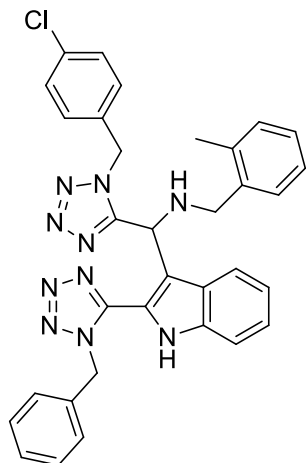

294 mg, 49% yield, white solid. mp 93 - 94 °C. <sup>1</sup>H NMR (500 MHz, CDCl<sub>3</sub>) δ 7.98 (s, 1H), 7.57 (d, *J* = 8.1 Hz, 1H), 7.42 - 7.39 (m, 2H), 7.23 - 7.18 (m, 3H), 7.17 - 7.14 (m, 1H), 7.10 (t, *J* = 7.1 Hz, 2H), 7.06 (d, *J* = 8.2 Hz, 1H), 7.02 - 6.99 (m, 3H), 6.84 - 6.80 (m, 2H), 6.67 (d, *J* = 8.4 Hz, 2H), 5.79 - 5.76 (m, 1H), 5.69 - 5.60 (m, 3H), 5.47 - 5.44 (m, 1H), 3.61 - 3.55 (m, 2H), 2.97 (s, 1H), 2.13 (s, 3H). <sup>13</sup>C NMR (126 MHz, CDCl<sub>3</sub>) δ 155.9, 148.1, 137.2, 134.3, 134.0, 132.2, 130.7, 129.9, 129.8, 129.6, 129.2, 128.9, 128.6, 128.4, 127.7, 127.6, 126.0, 125.4, 121.8, 120.3, 117.8, 112.0, 51.9, 50.1, 49.0, 48.3, 19.0. HRMS (ESI) *m/z* calcd for C<sub>33</sub>H<sub>30</sub>ClN<sub>10</sub> [M + H]<sup>+</sup> = 601.2338, found 601.2337.

### 3. Exemplary copies of NMR and MS data of novel compounds

#### *N*-(1-(1-benzyl-1*H*-tetrazol-5-yl)-2,2-dimethoxyethyl)-3,4,5-trimethoxyaniline (1a)

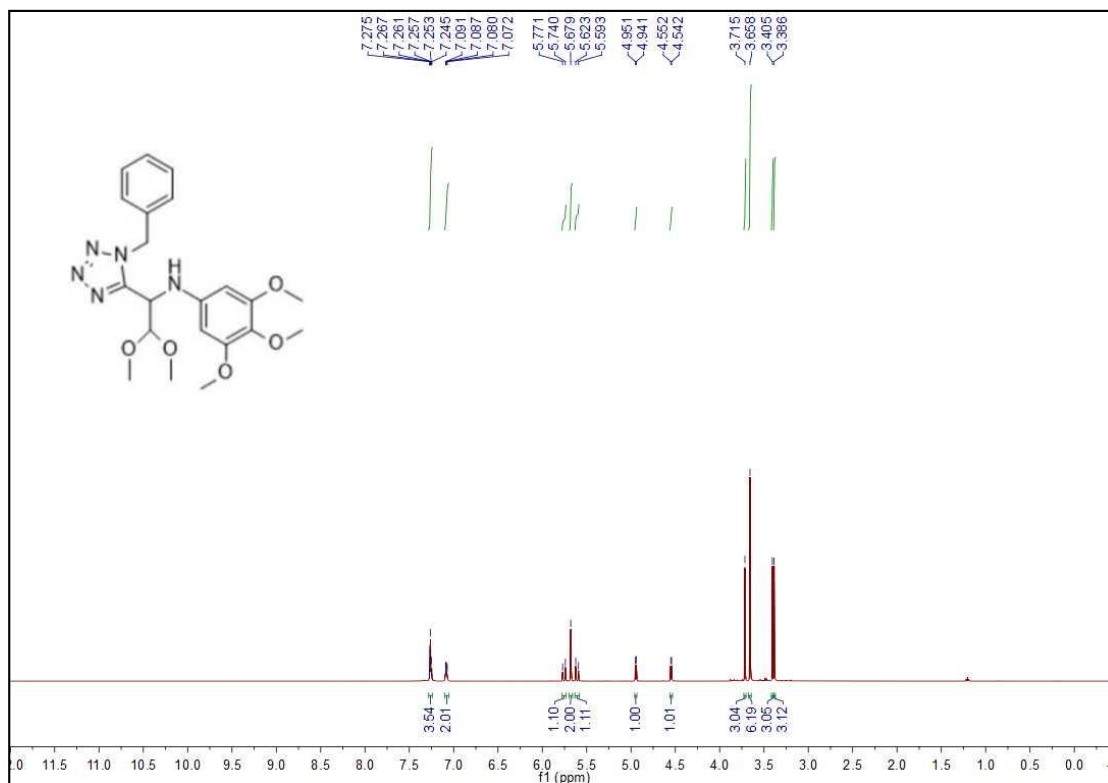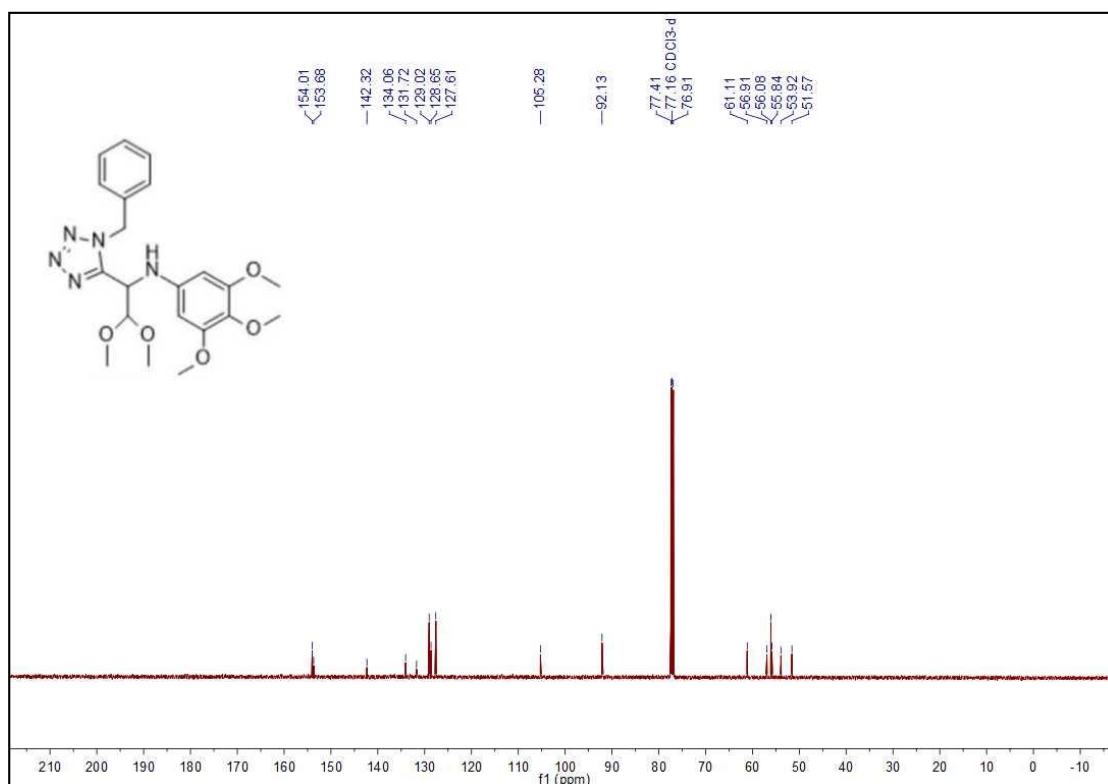

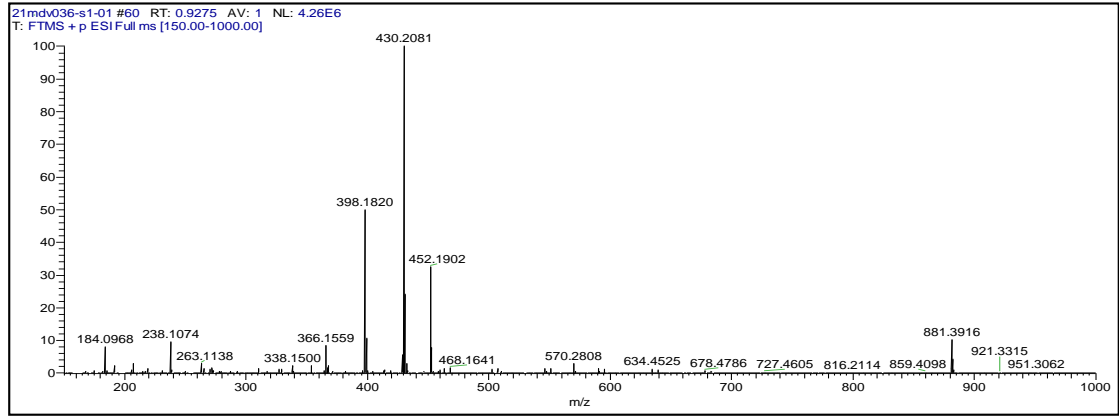

***N*-(1-(1-benzyl-1*H*-tetrazol-5-yl)-2,2-dimethoxyethyl)-2,3-dihydrobenzo[*b*][1,4]dioxin-6-amine (1b)**

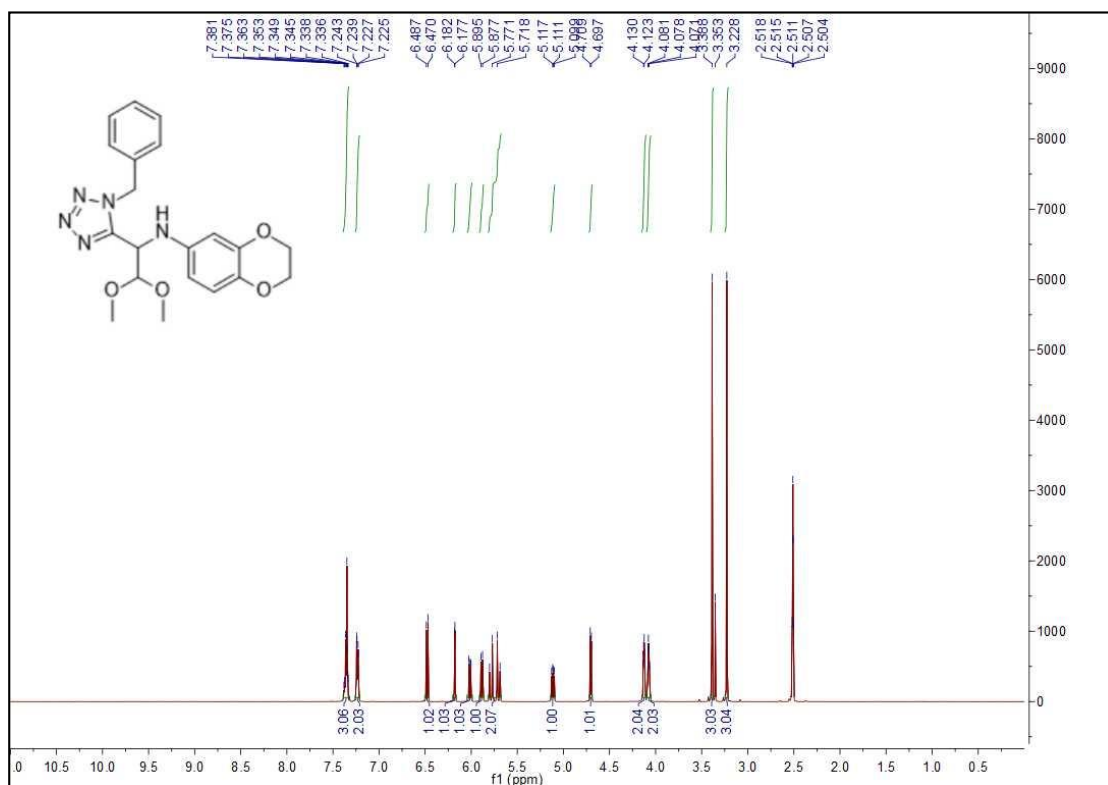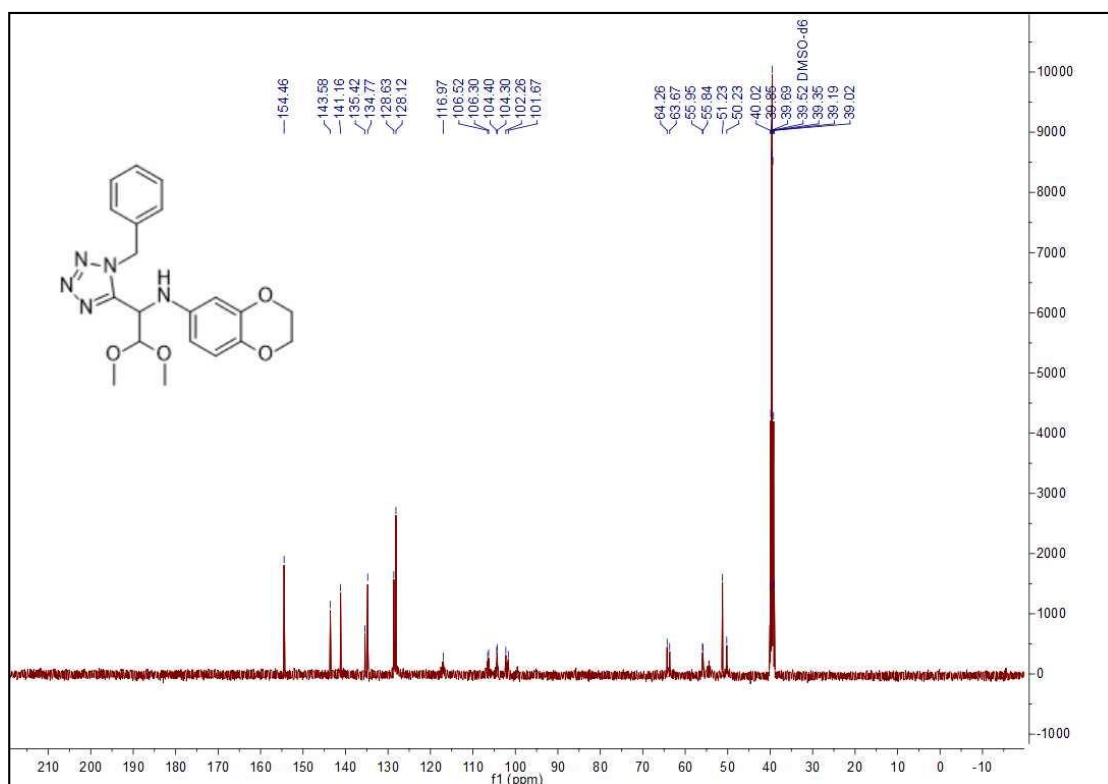



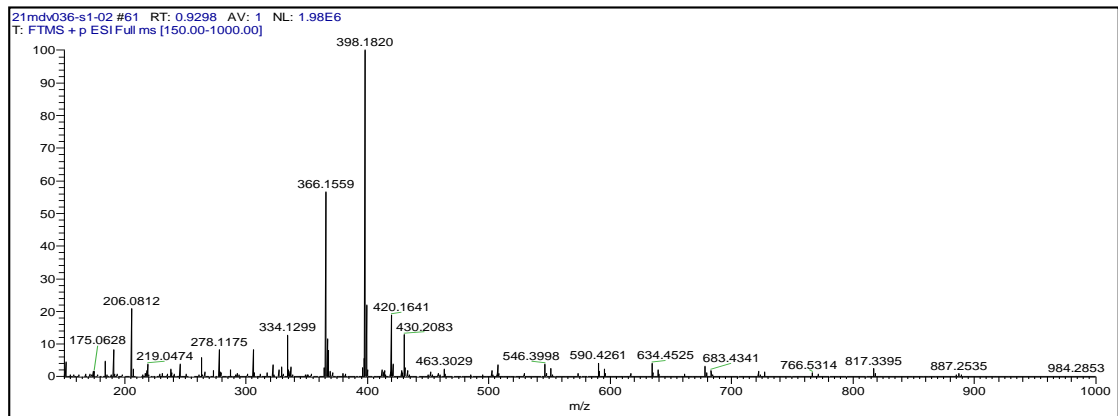

***N*-(1-(1-benzyl-1*H*-tetrazol-5-yl)-2,2-dimethoxyethyl)-3-methoxyaniline (1c)**

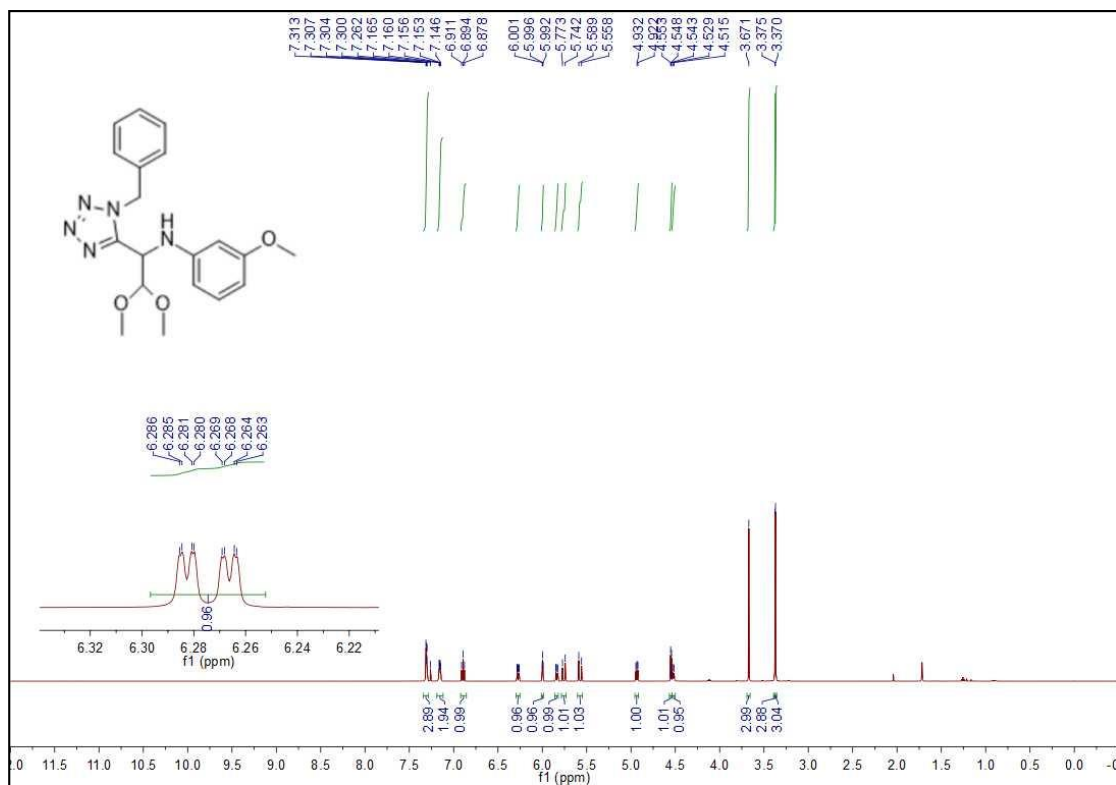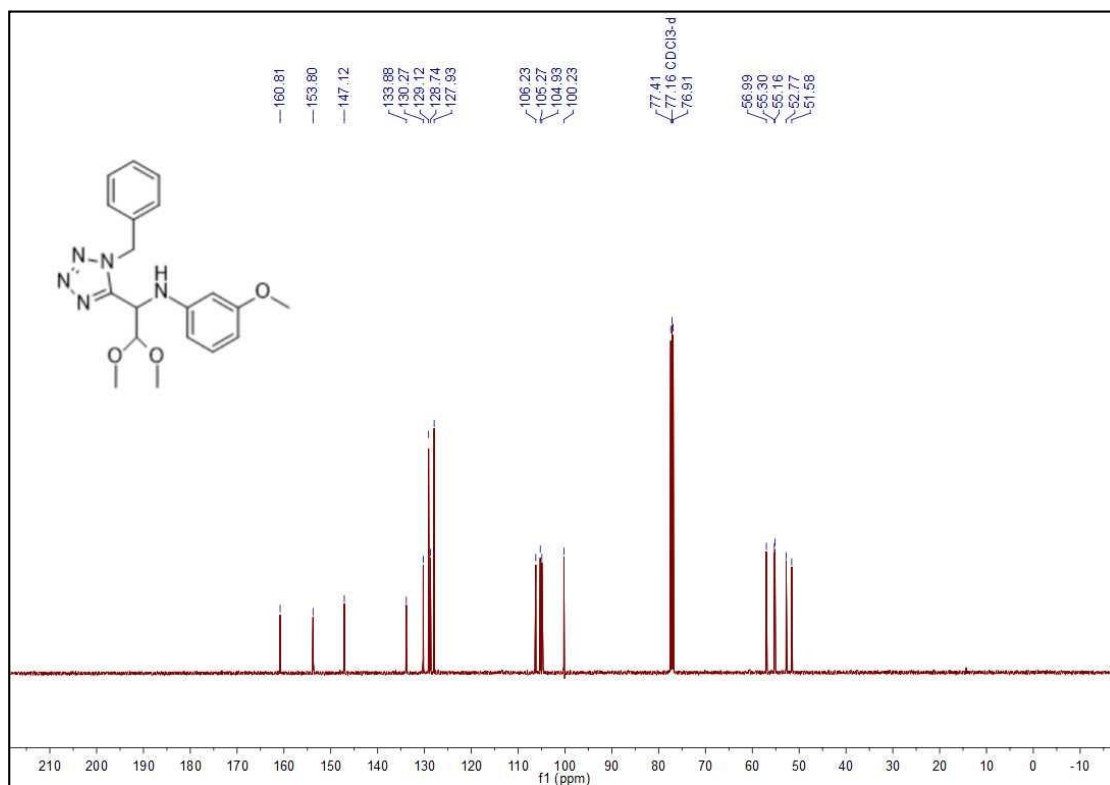

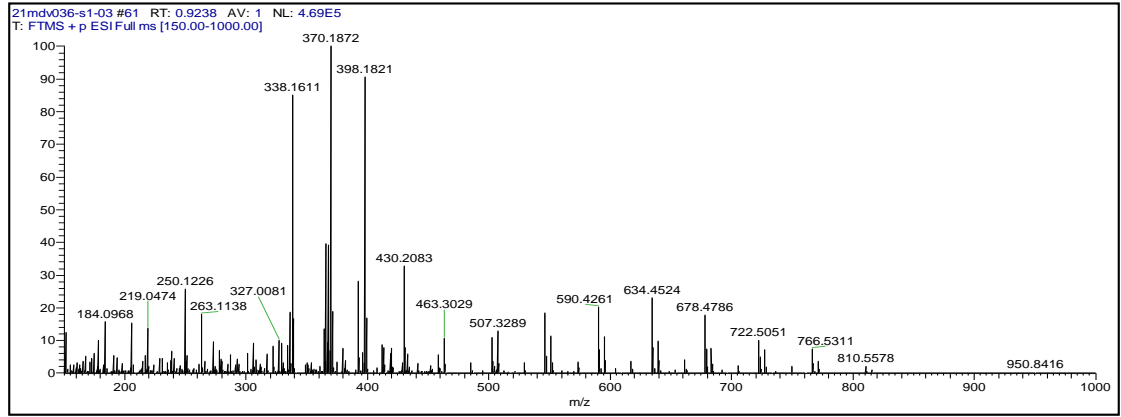

***N*-(1-(1-benzyl-1*H*-tetrazol-5-yl)-2,2-dimethoxyethyl)-4-chloroaniline (1d)**

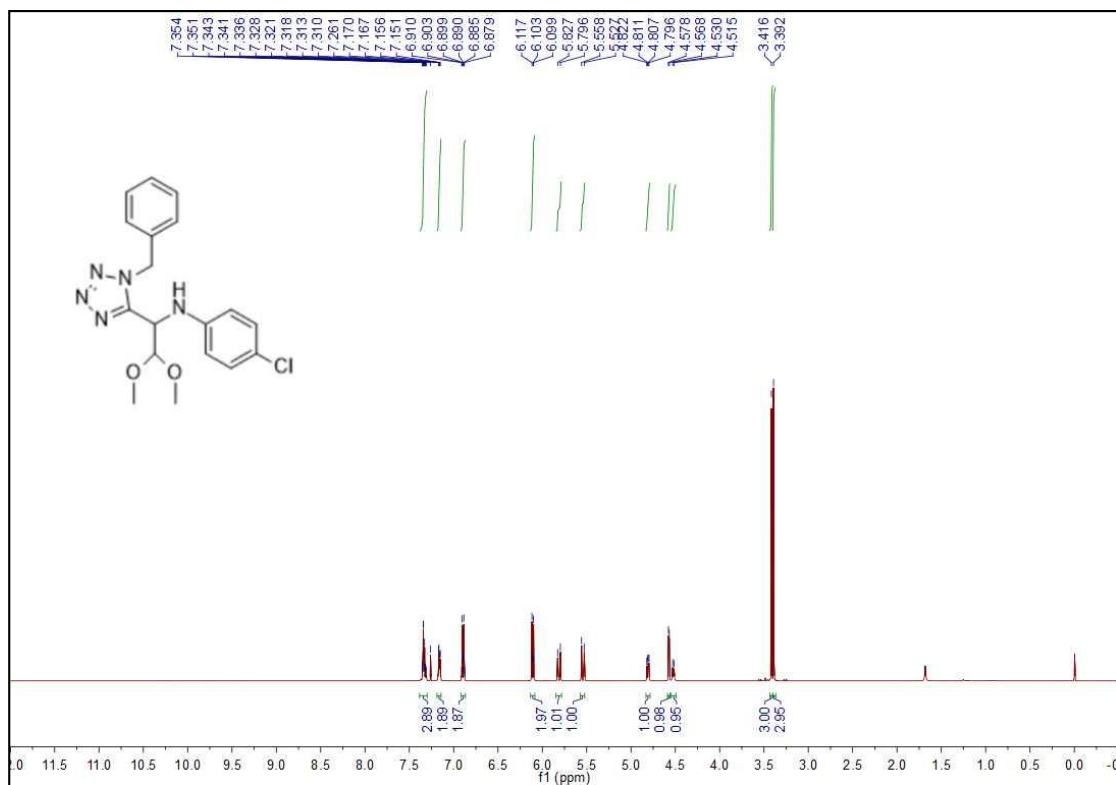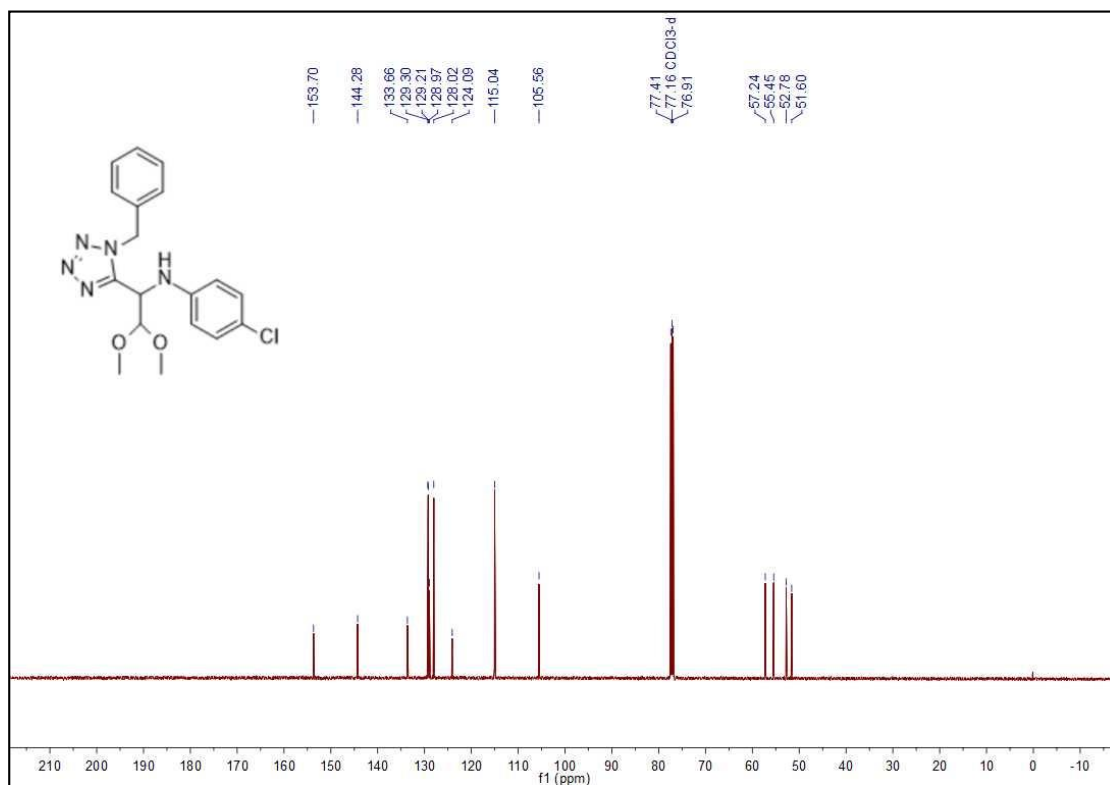

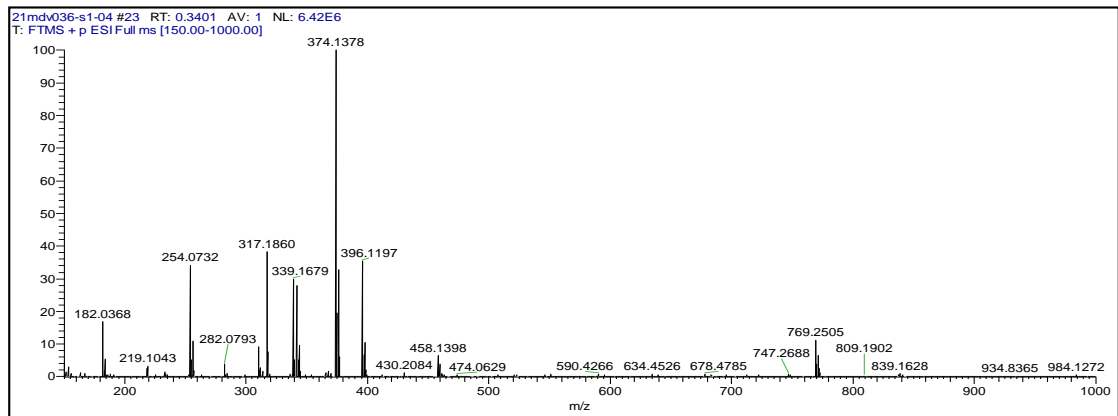

***N*-(1-(1-benzyl-1*H*-tetrazol-5-yl)-2,2-dimethoxyethyl)-2,4-dimethylaniline (1e)**

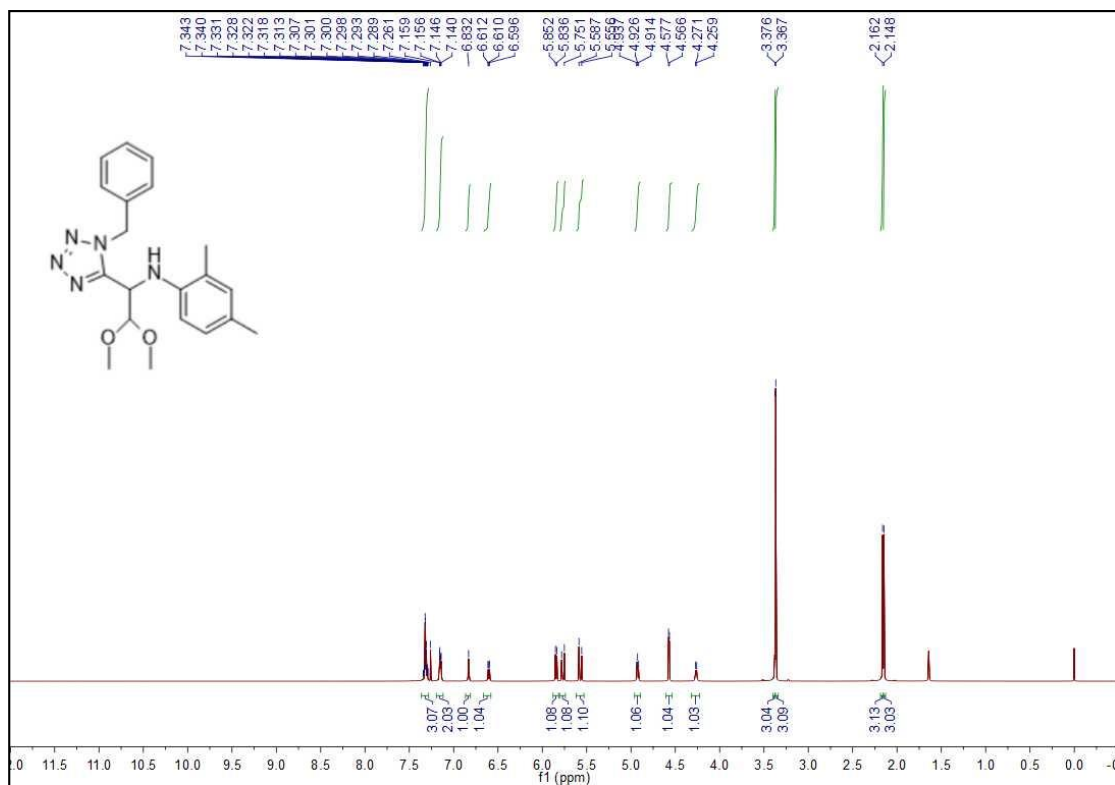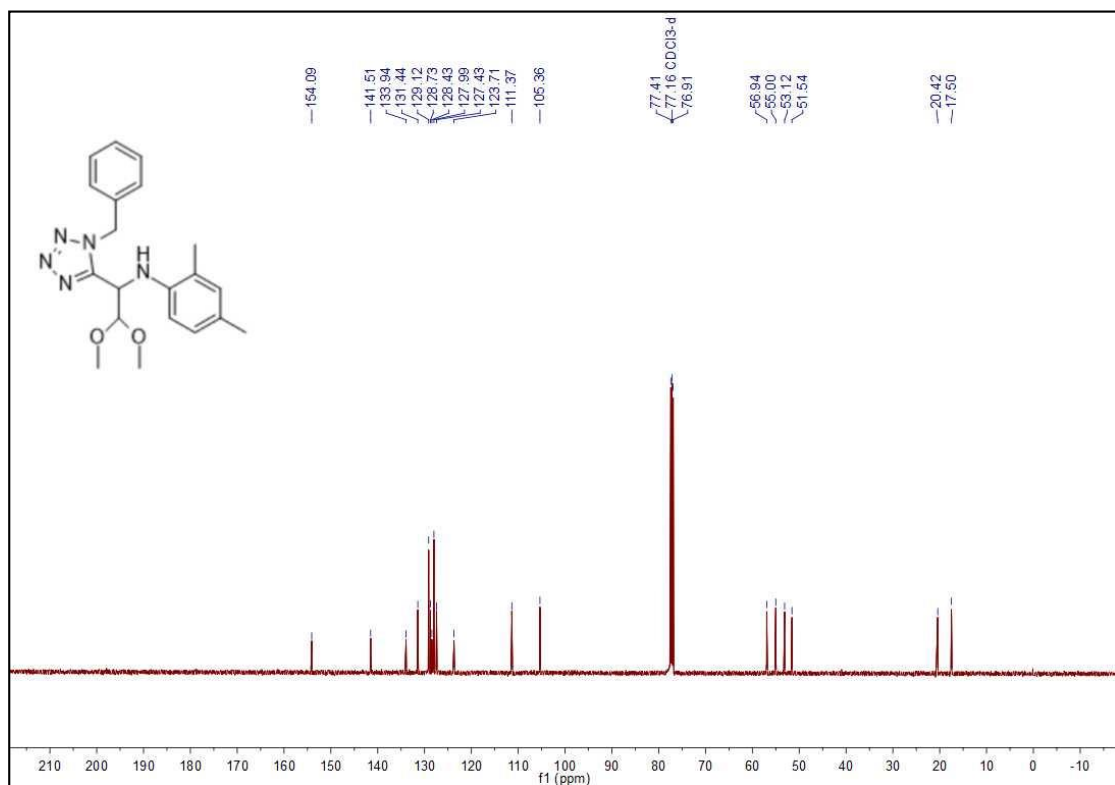

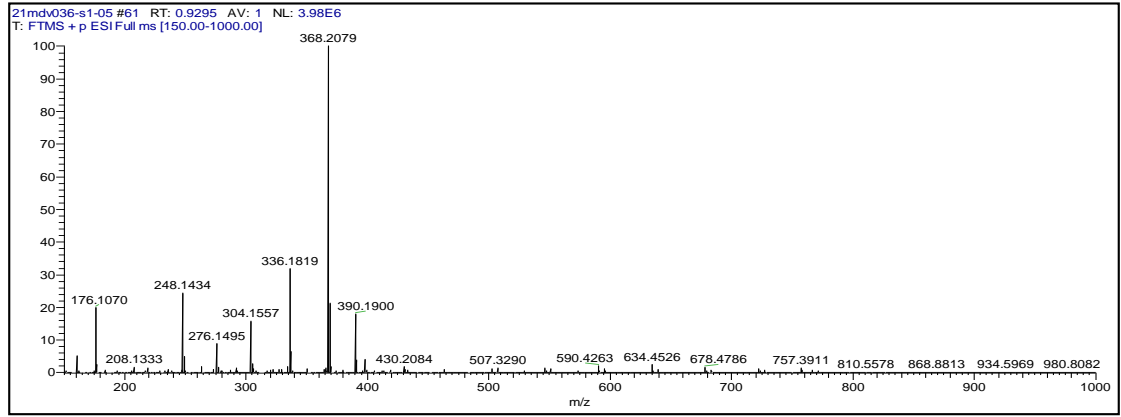

***N*-(1-(1-benzyl-1*H*-tetrazol-5-yl)-2,2-dimethoxyethyl)aniline (1f)**

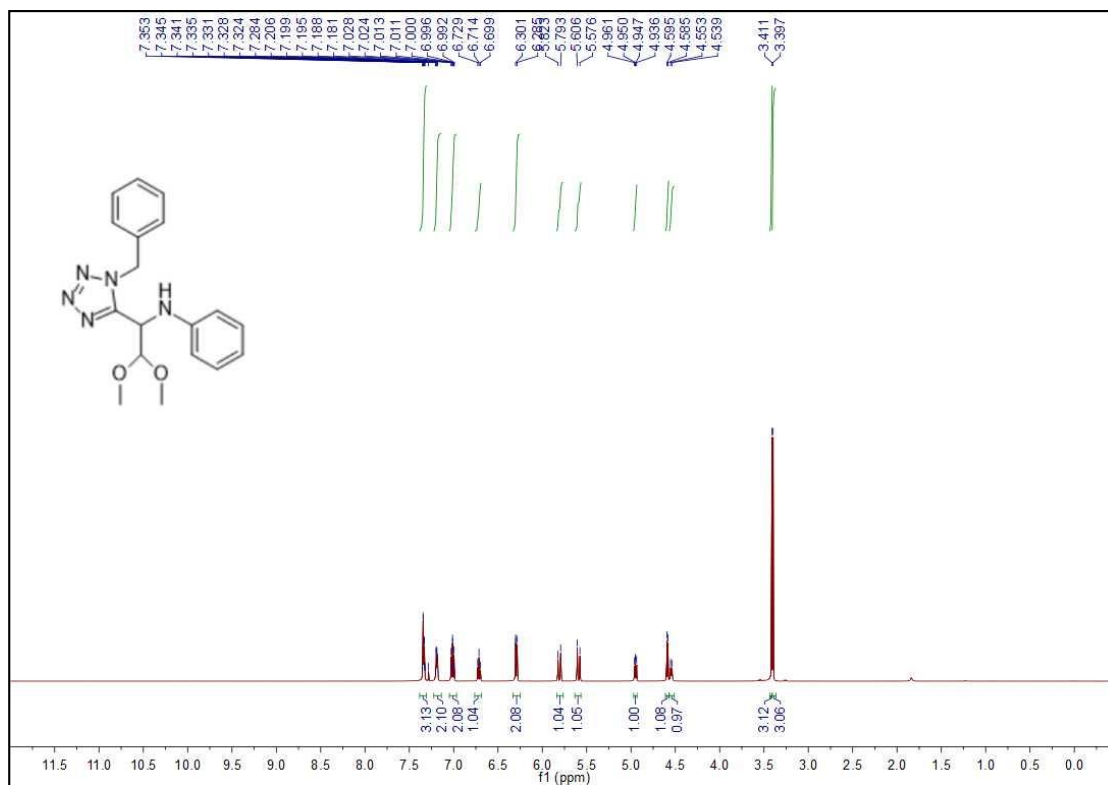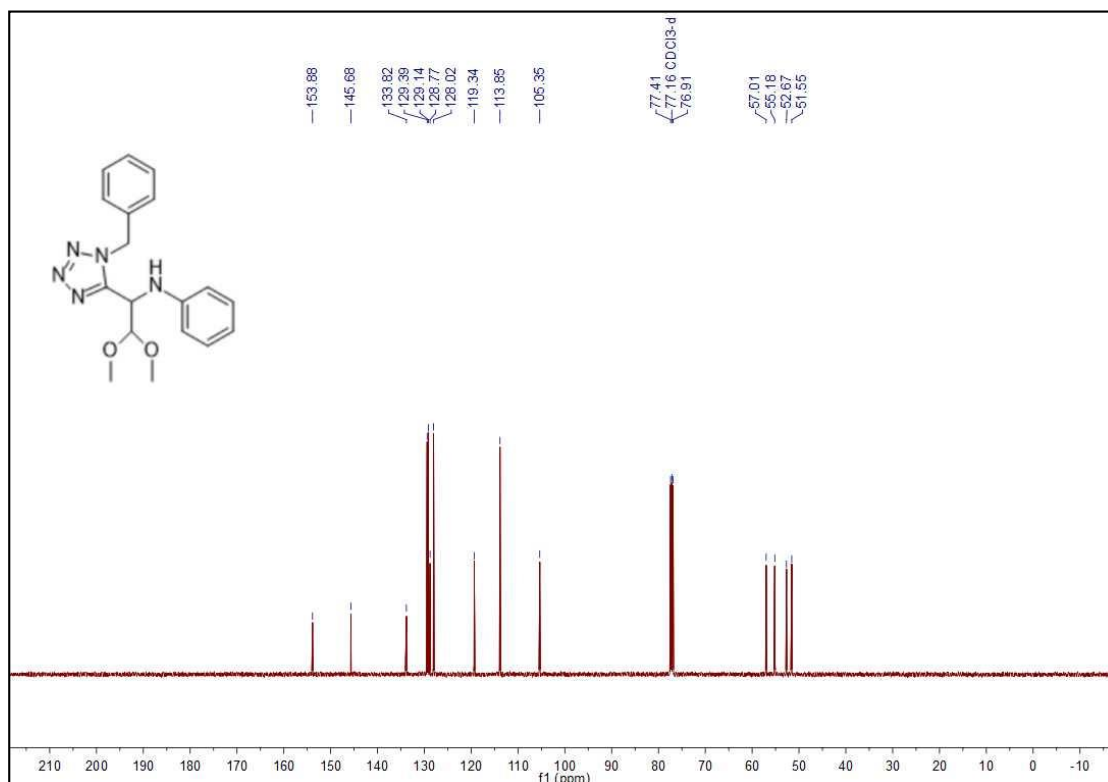



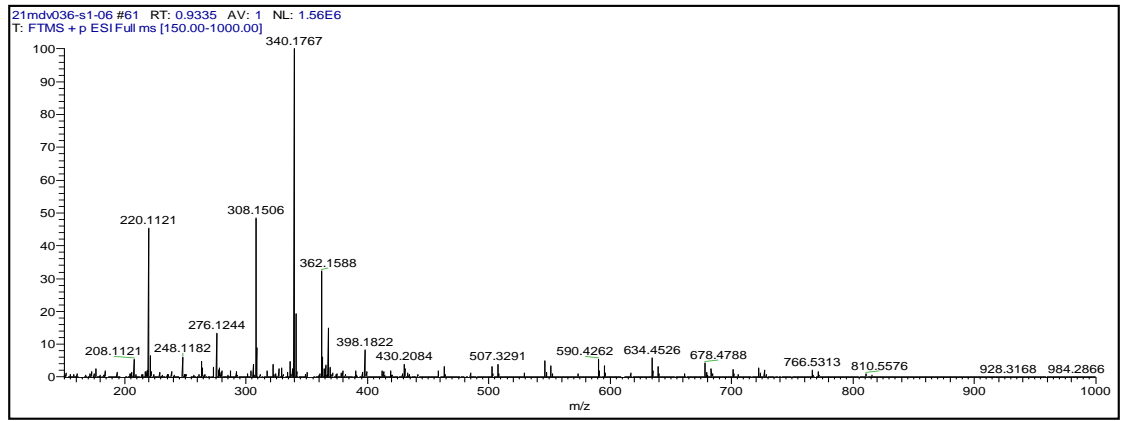

***N*-(1-(1-benzyl-1*H*-tetrazol-5-yl)-2,2-dimethoxyethyl)-4-isopropylaniline (1g)**

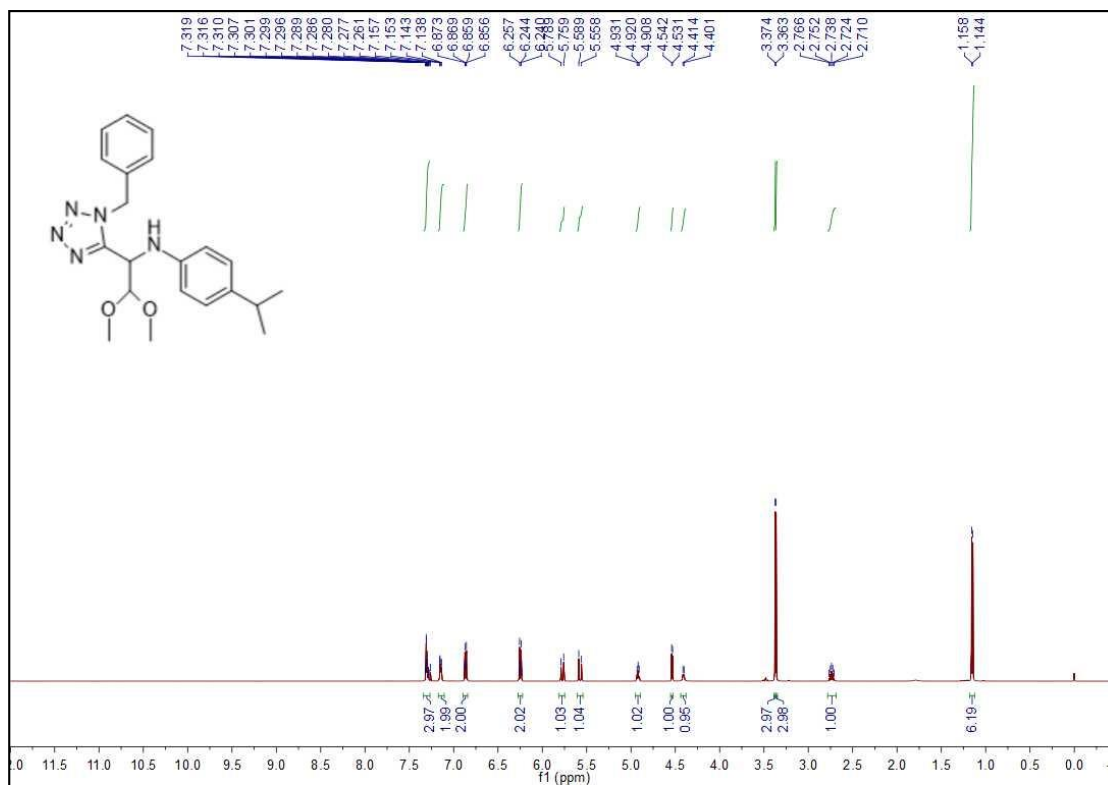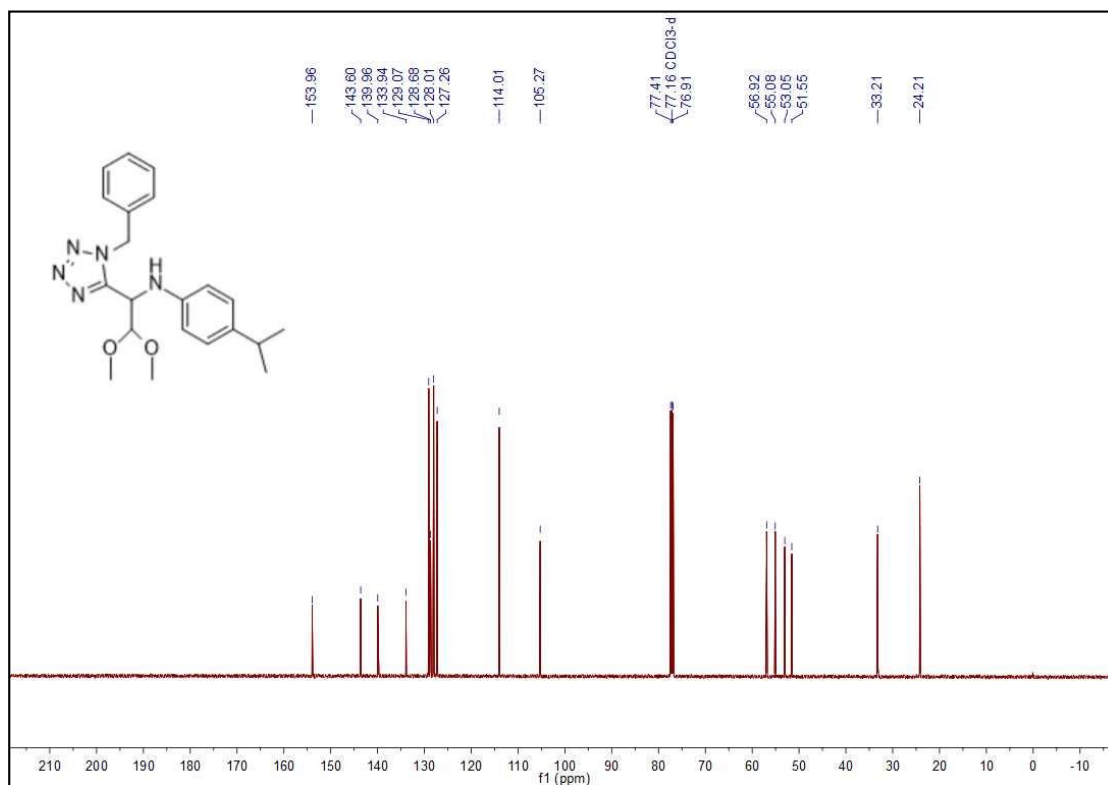

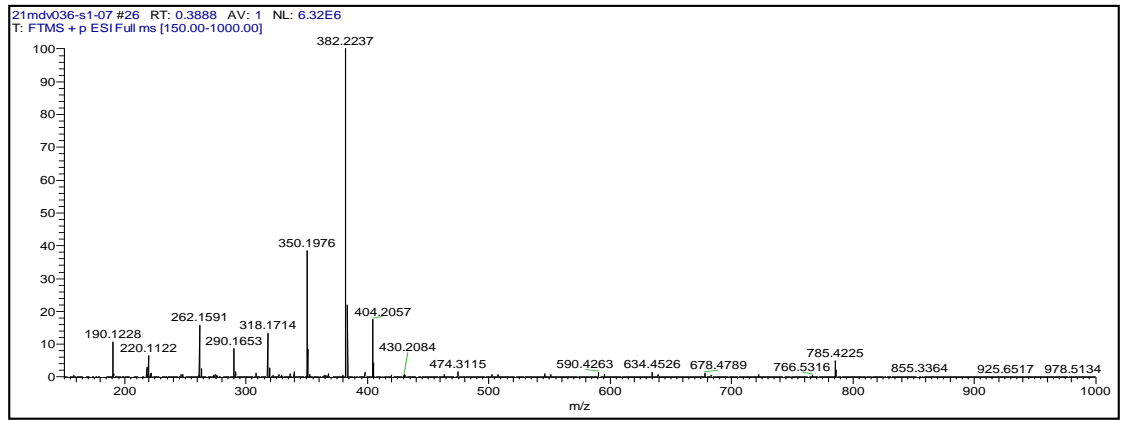

***N*-(1-(1-benzyl-1*H*-tetrazol-5-yl)-2,2-dimethoxyethyl)-3,4-dimethoxyaniline (1h)**

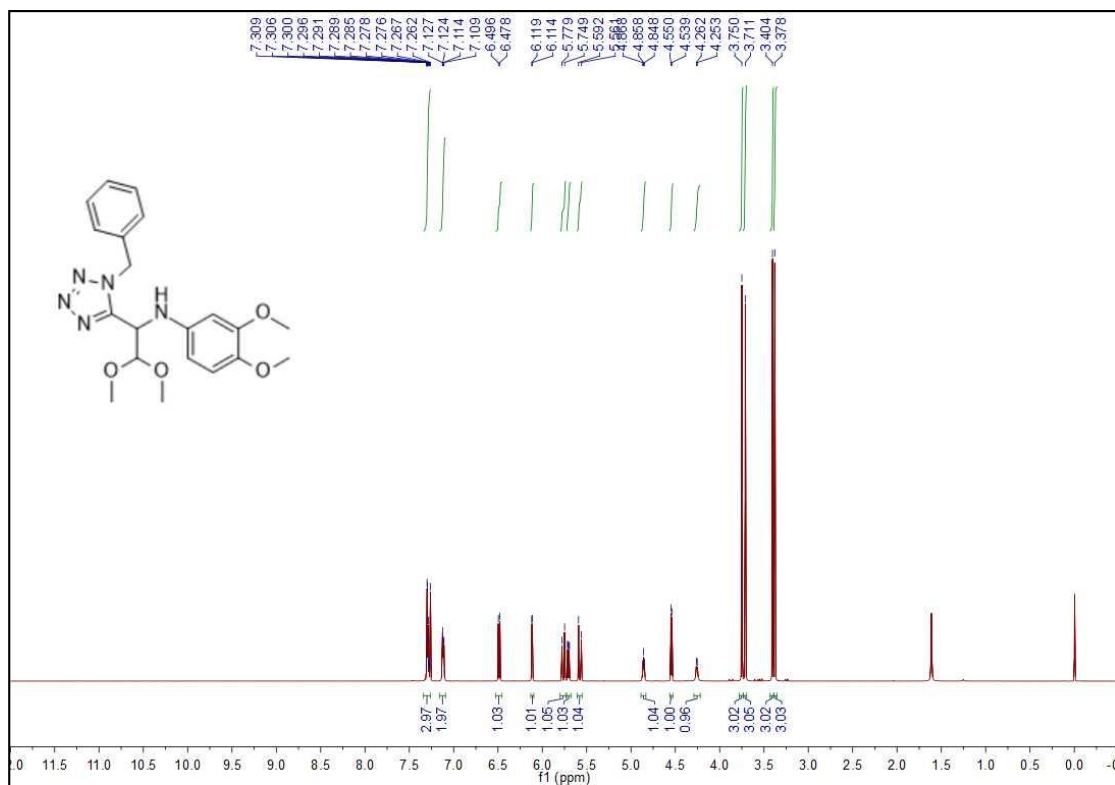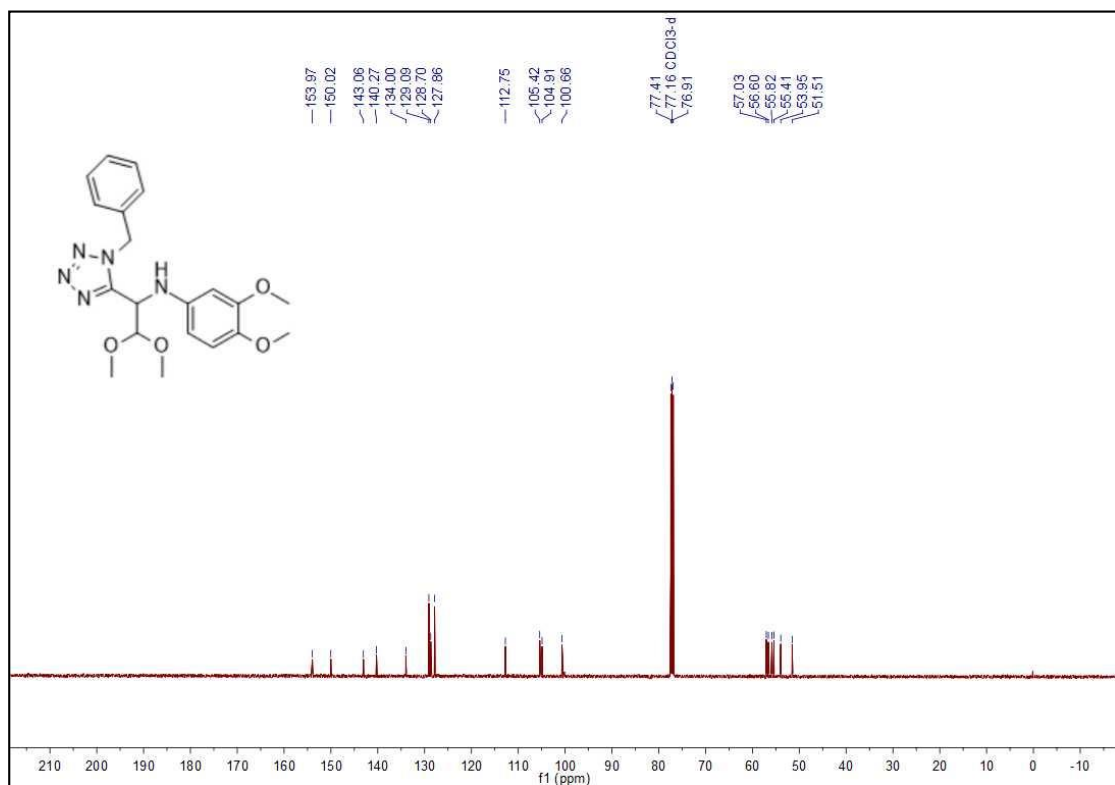

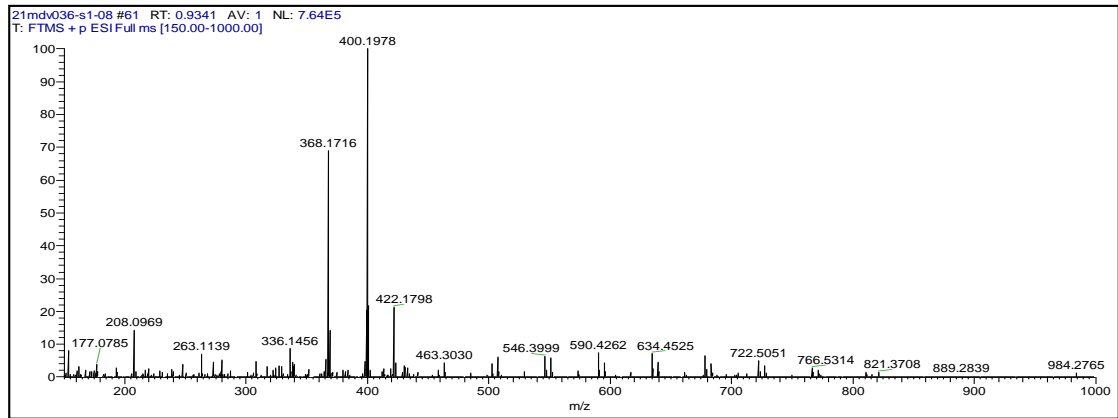

***N*-(1-(1-benzyl-1*H*-tetrazol-5-yl)-2,2-dimethoxyethyl)-3,5-dimethylaniline (1i)**

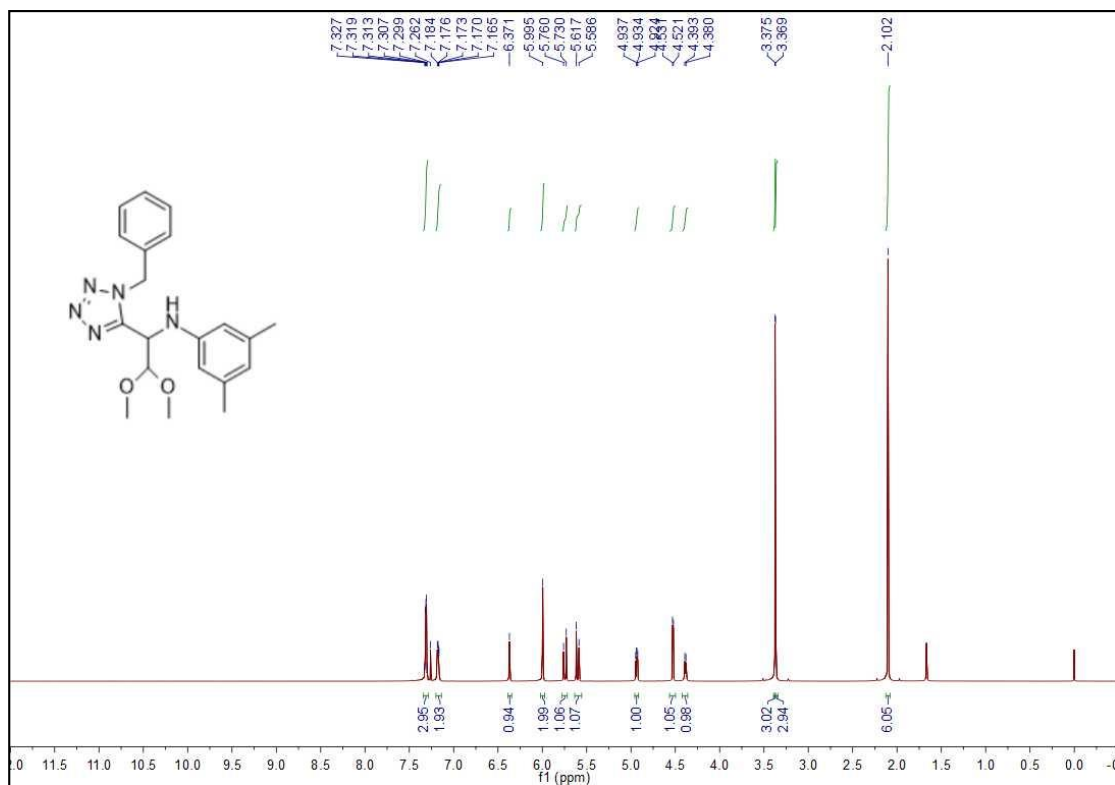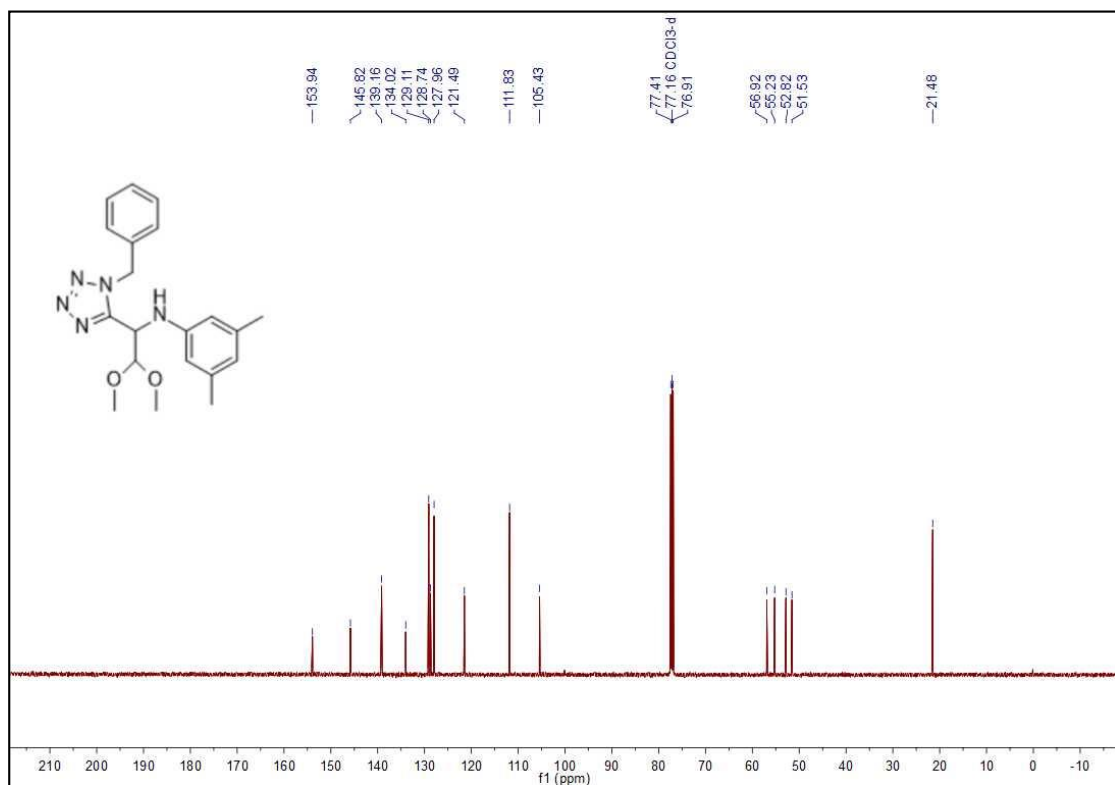

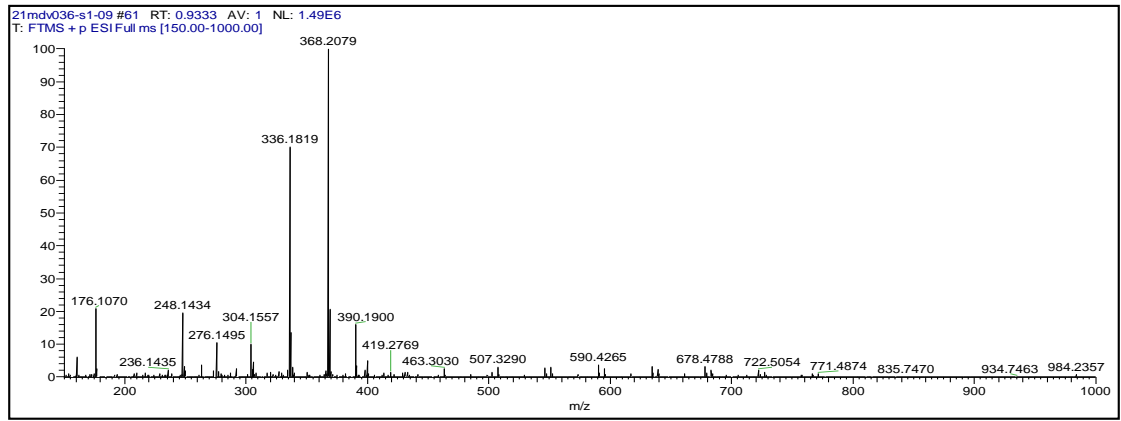

***N*-(1-(1-benzyl-1*H*-tetrazol-5-yl)-2,2-dimethoxyethyl)-5,6,7,8-tetrahydro naphthalen-1-amine (1j)**

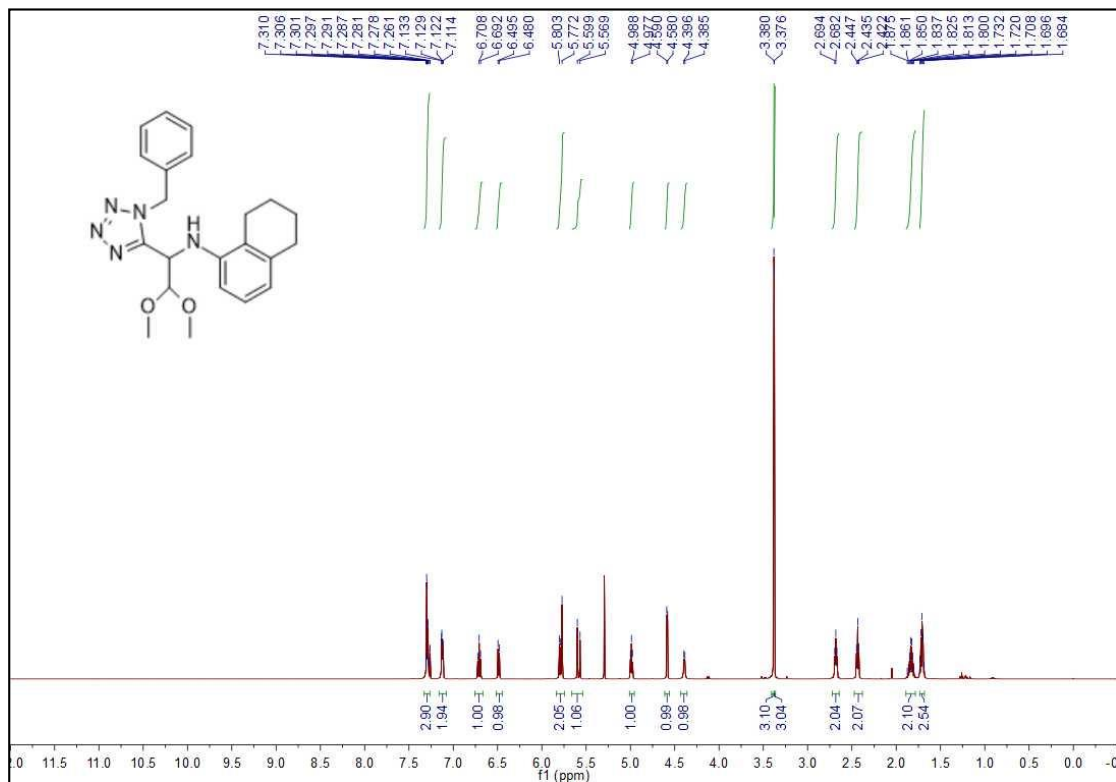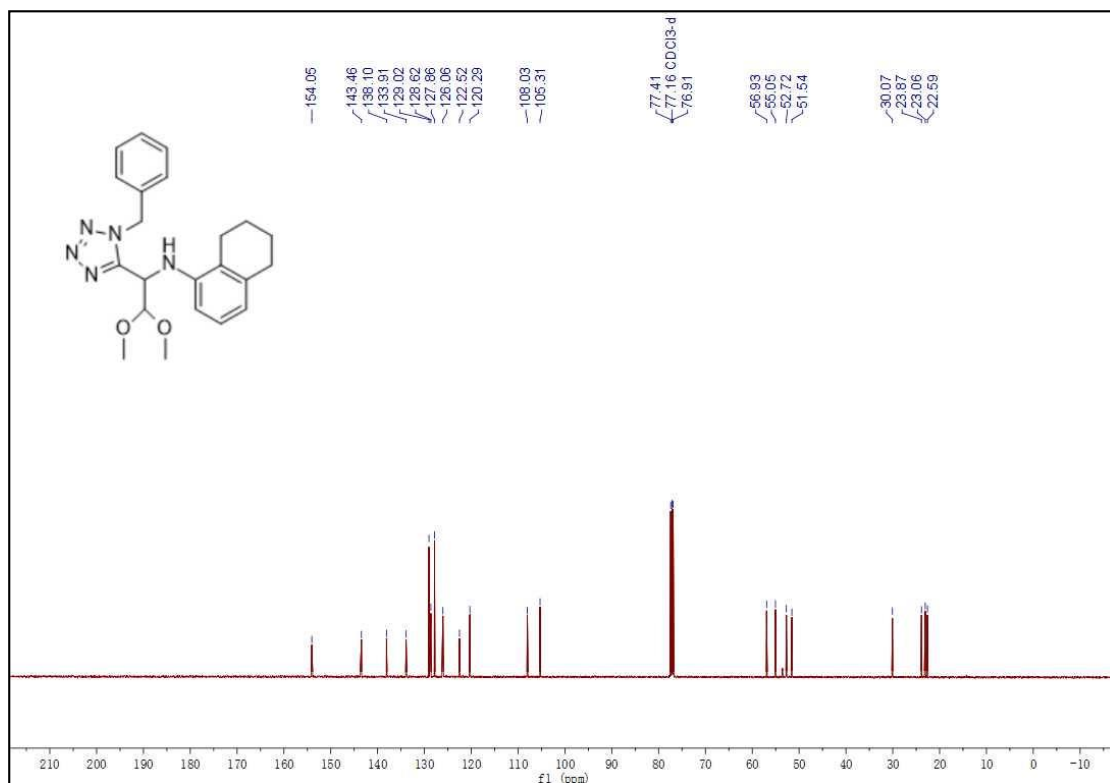



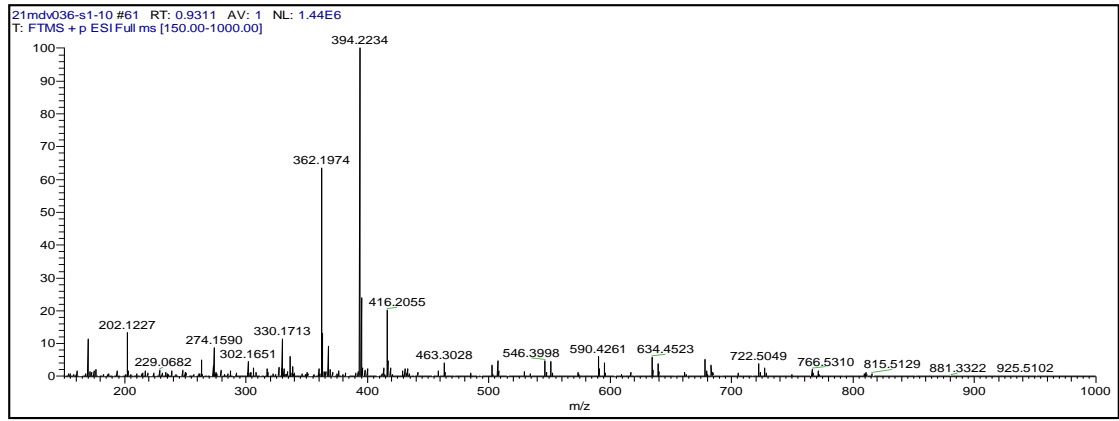

***N*-(2,2-dimethoxy-1-(1-phenyl-1*H*-tetrazol-5-yl)ethyl)-3,4,5-trimethoxyaniline (1k)**

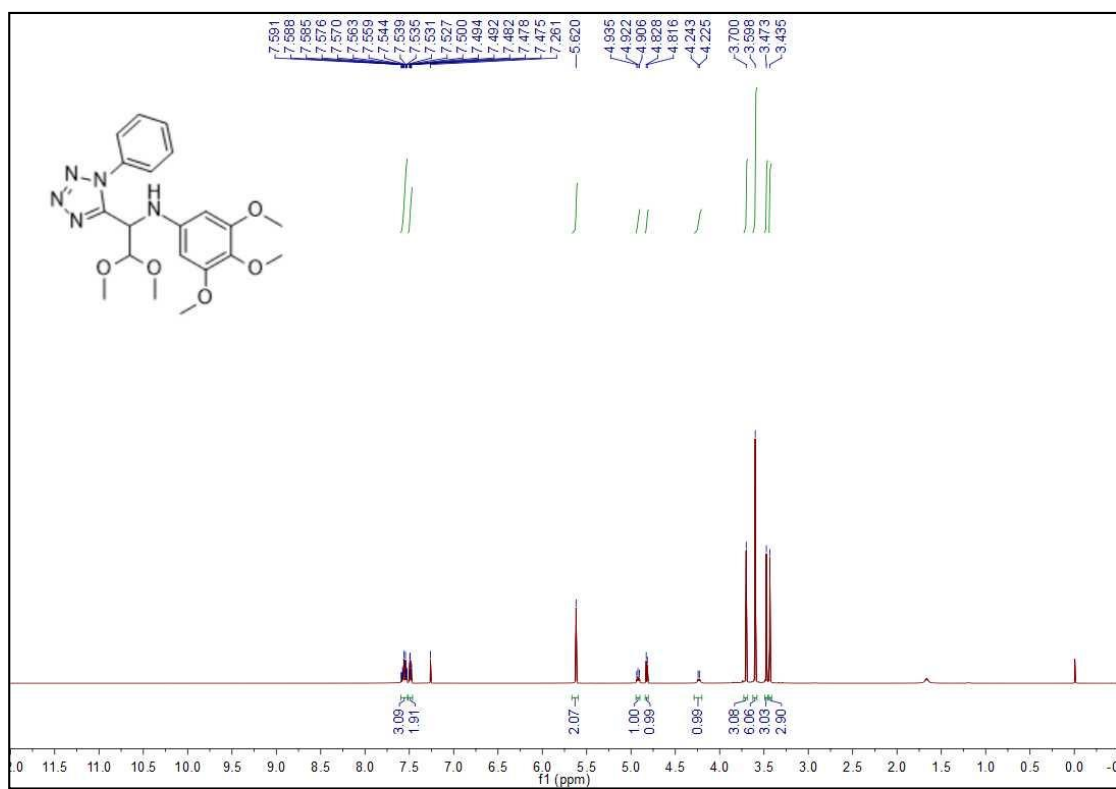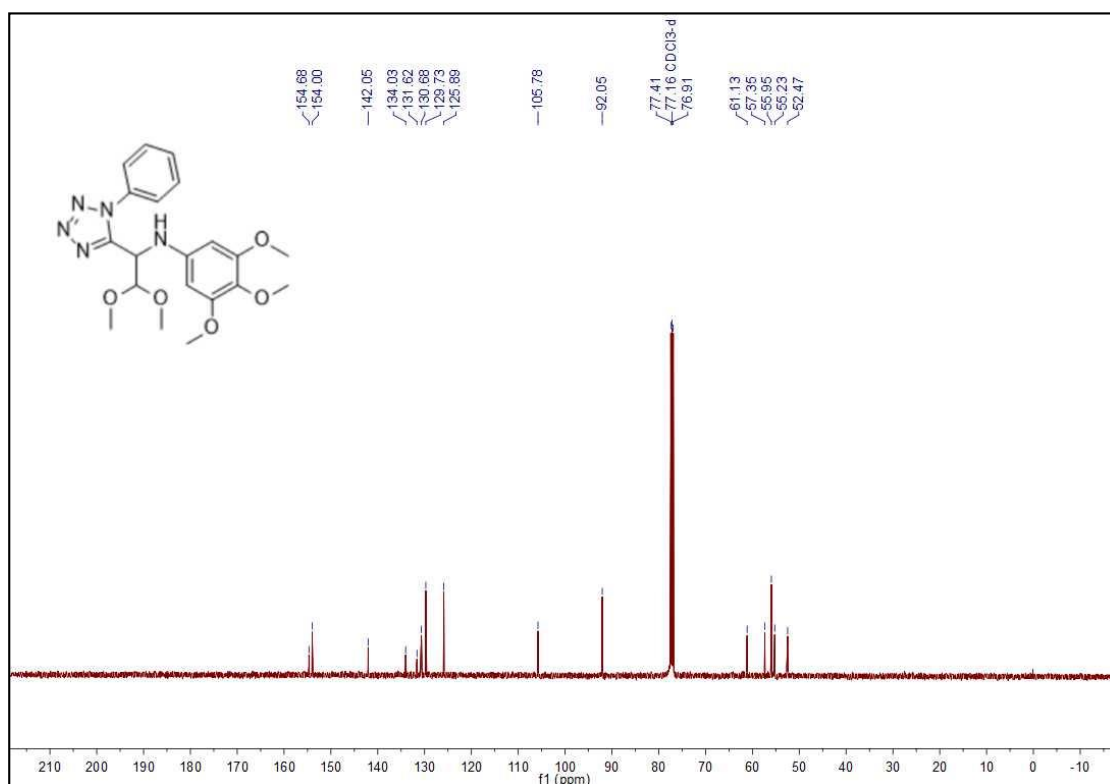

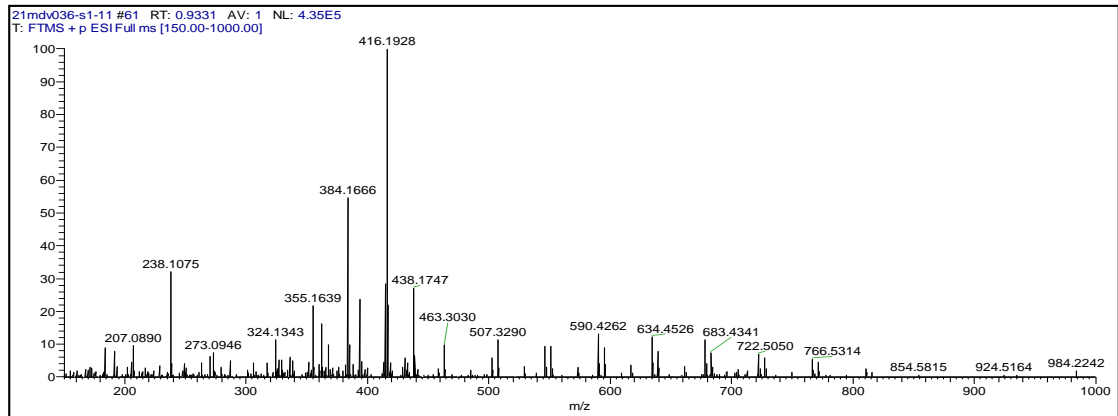

***N*-[1-(4-chlorophenyl)-1*H*-tetrazol-5-yl]-2,2-dimethoxyethyl]-3,4,5-trimethoxyaniline (1)**

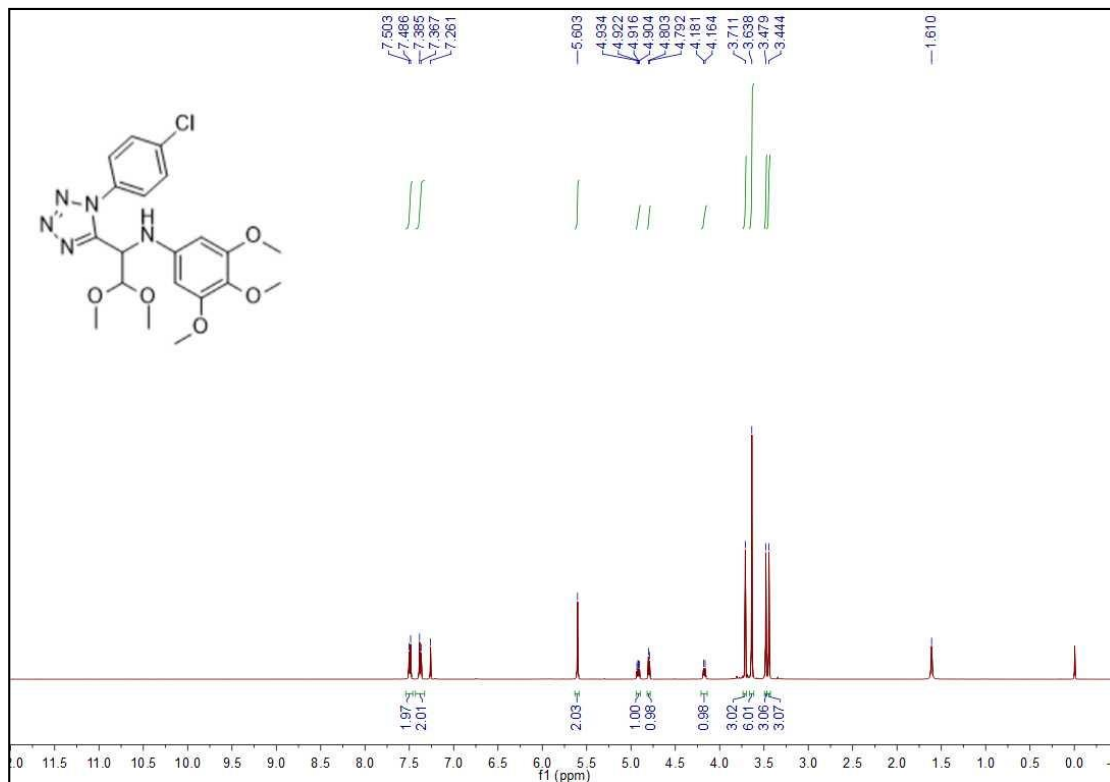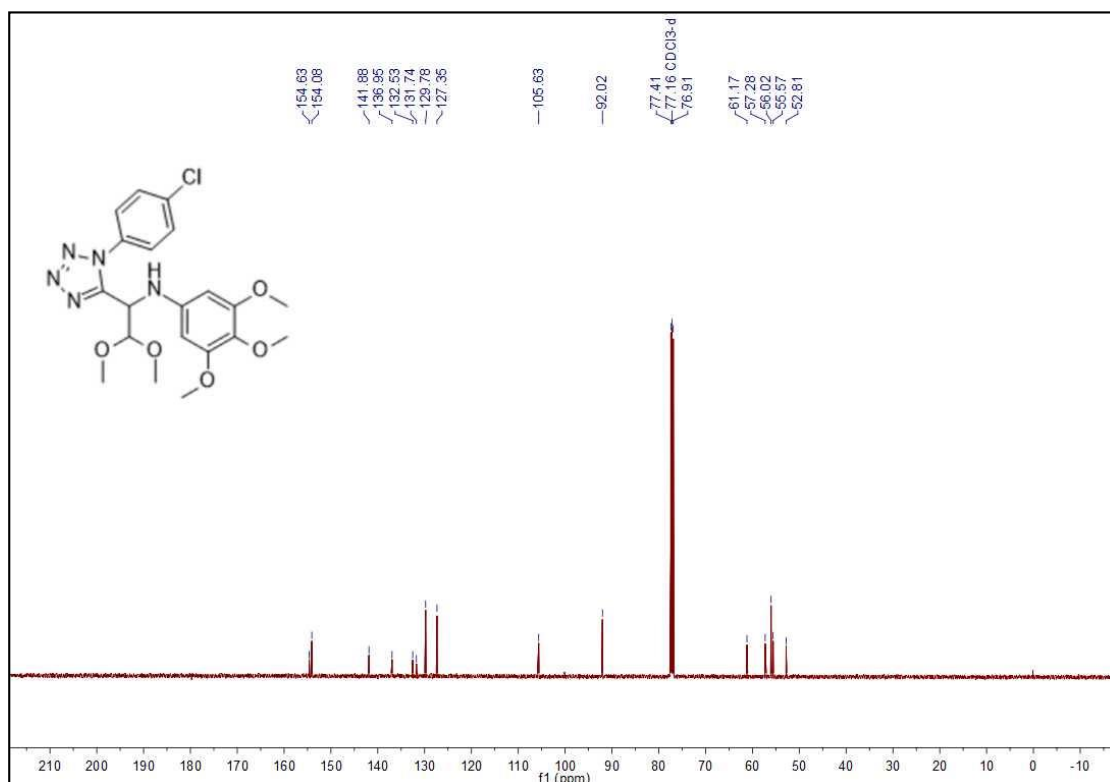

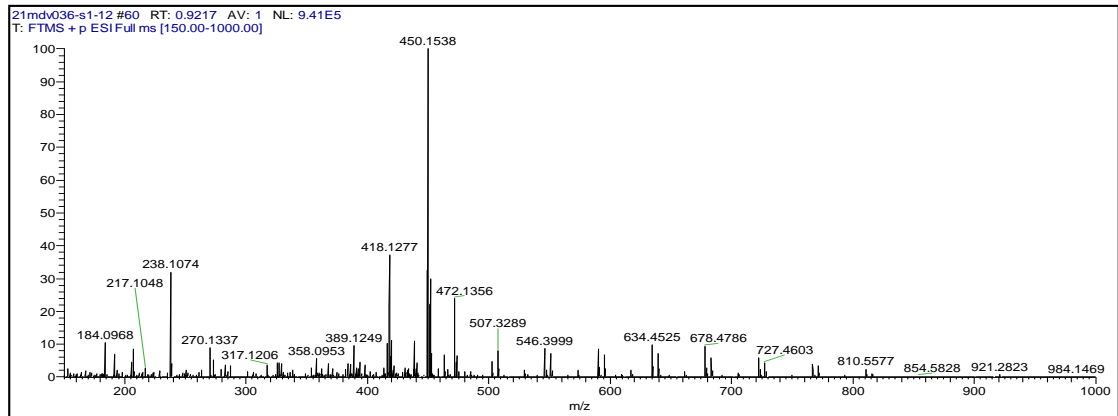

***N*-(1-(1-cyclohexyl-1*H*-tetrazol-5-yl)-2,2-dimethoxyethyl)-3,4,5-trimethoxyaniline (1m)**

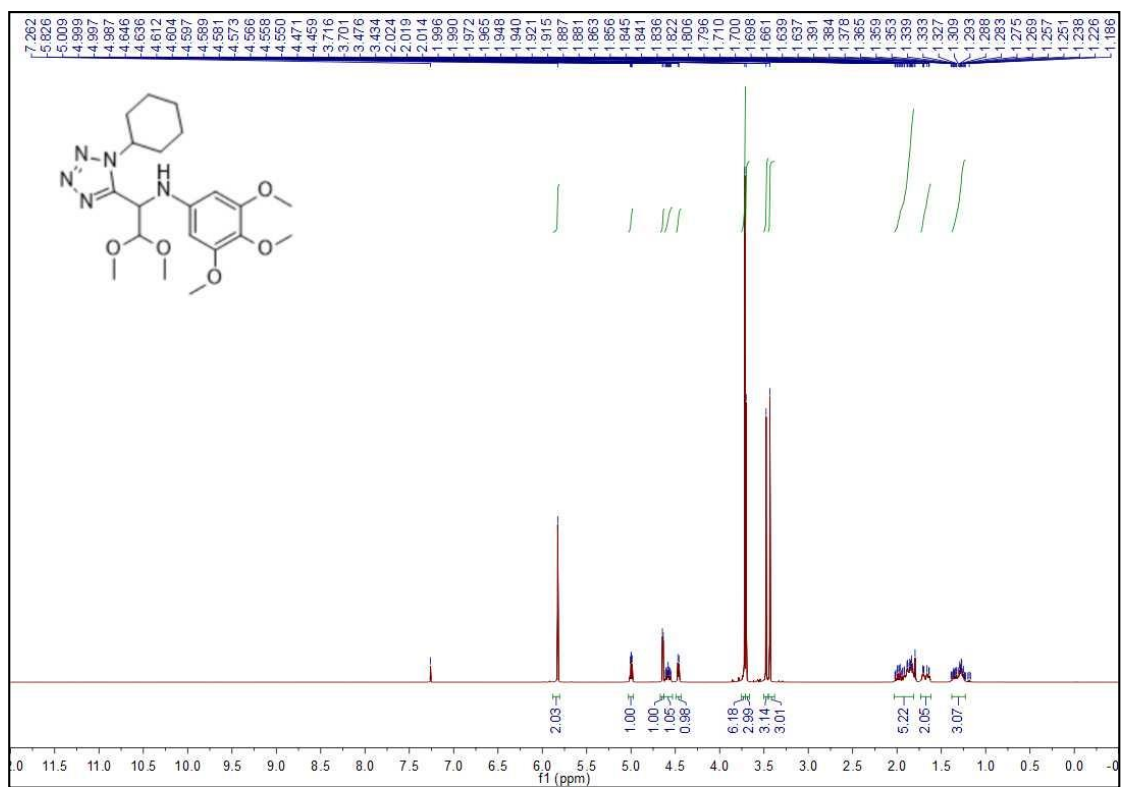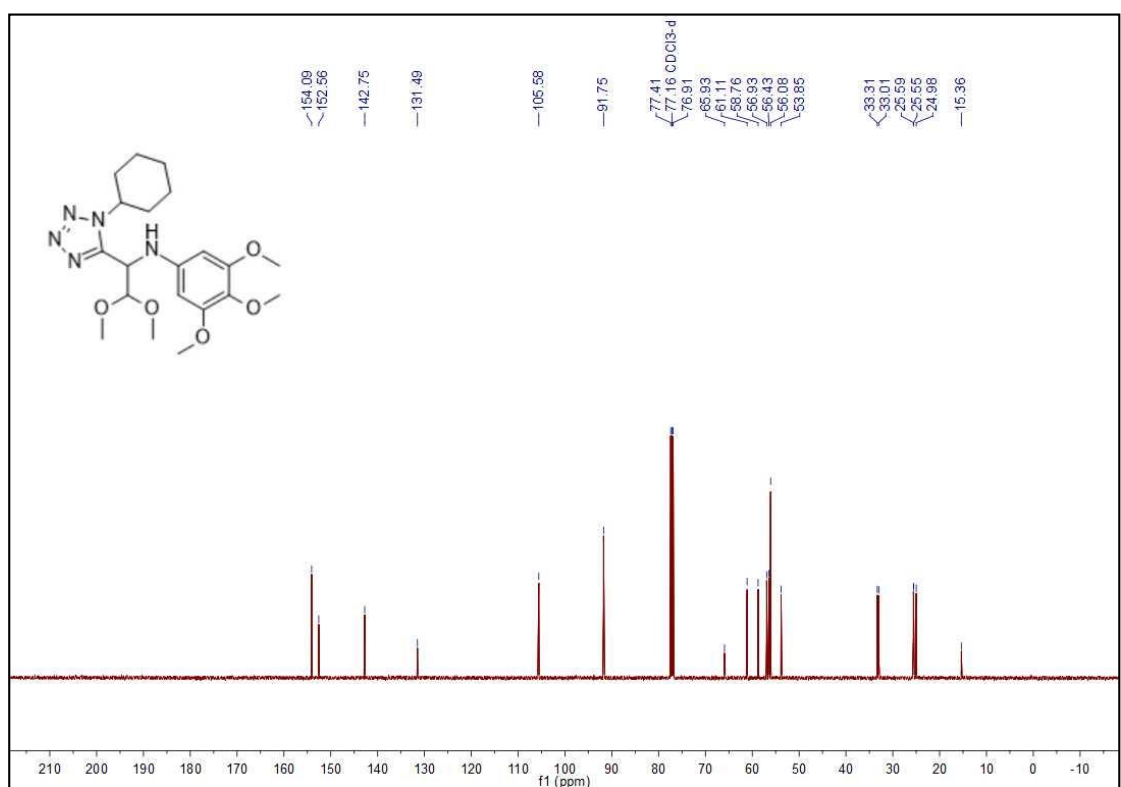

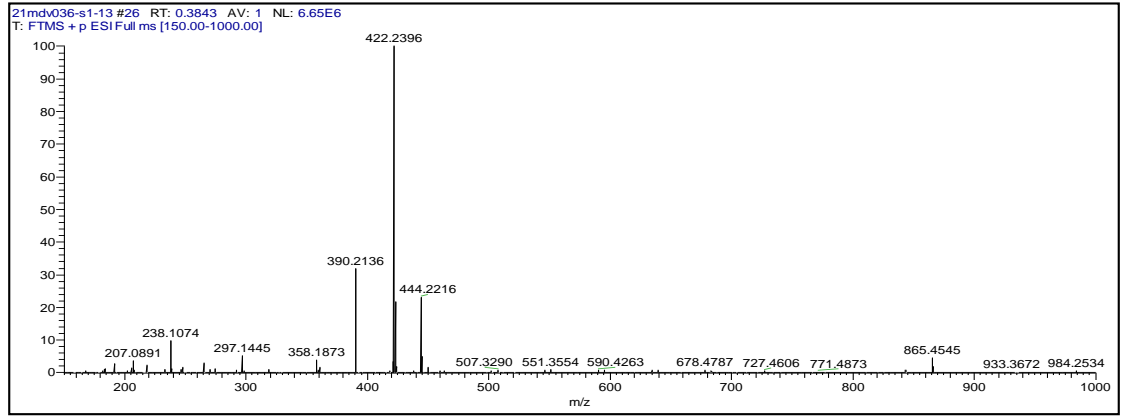

***N*-(2,2-dimethoxy-1-(1-(2-(trifluoromethyl)phenyl)-1*H*-tetrazol-5-yl)ethyl)-3,4,5-trimethoxyaniline (1n)**

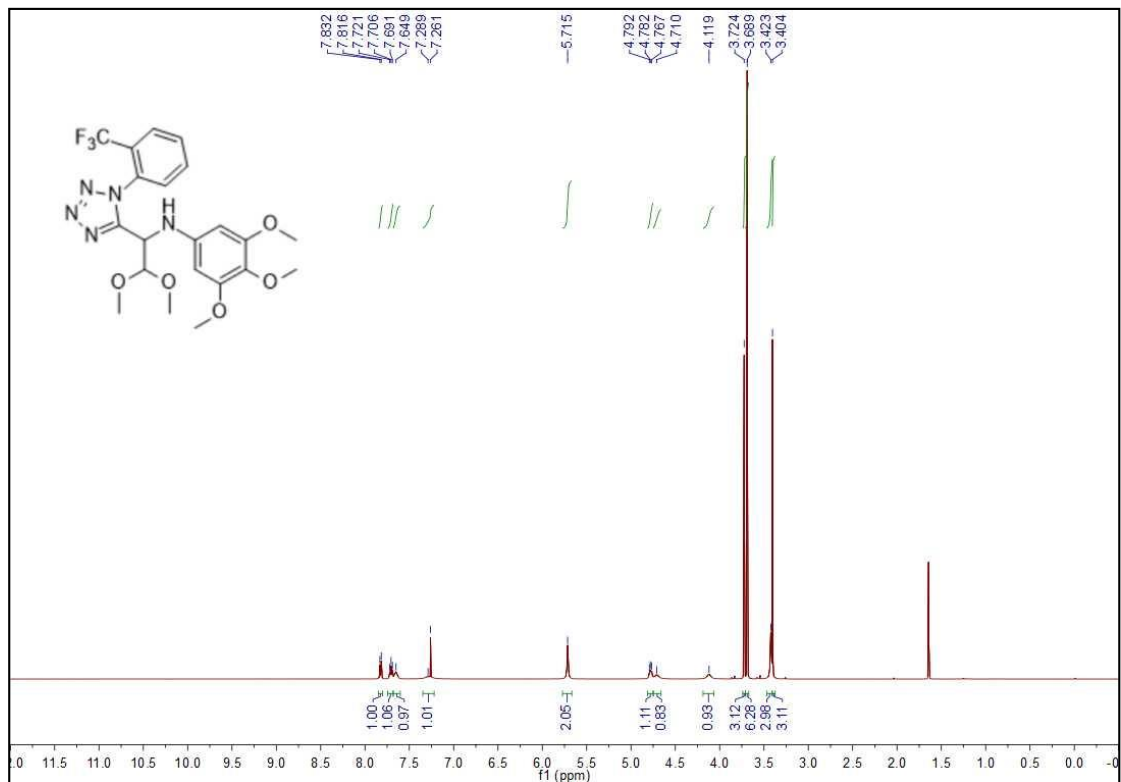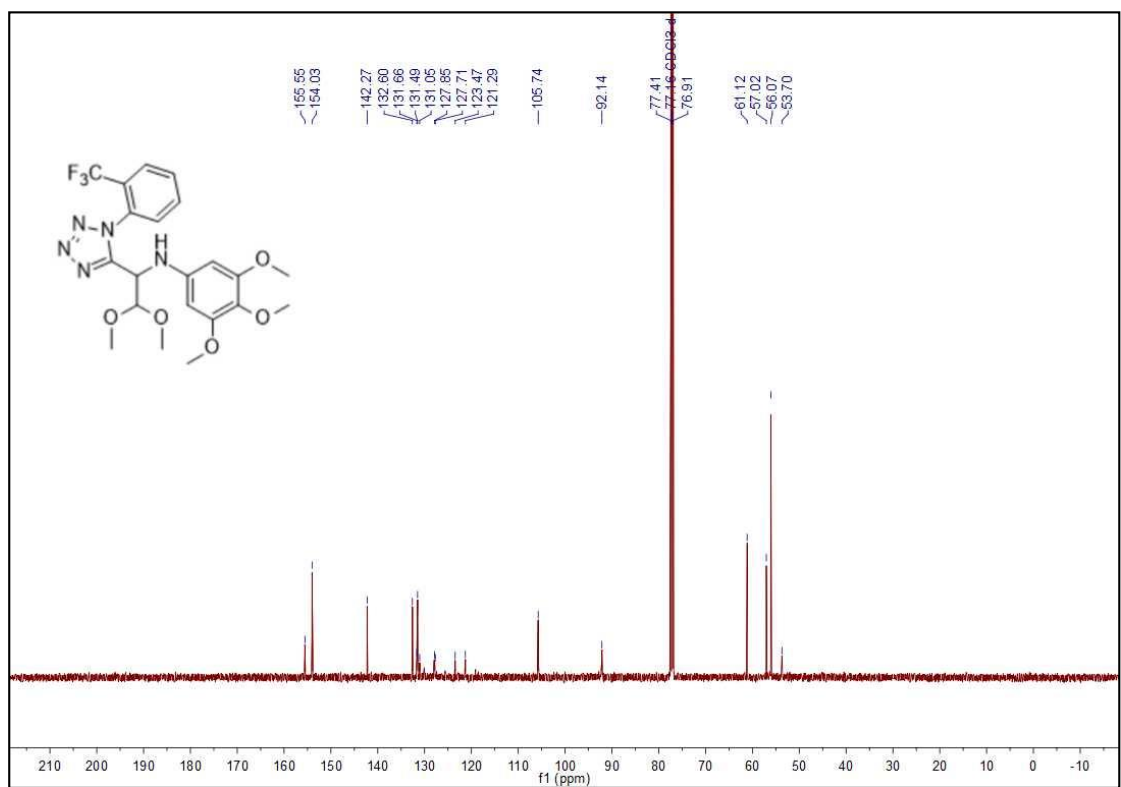



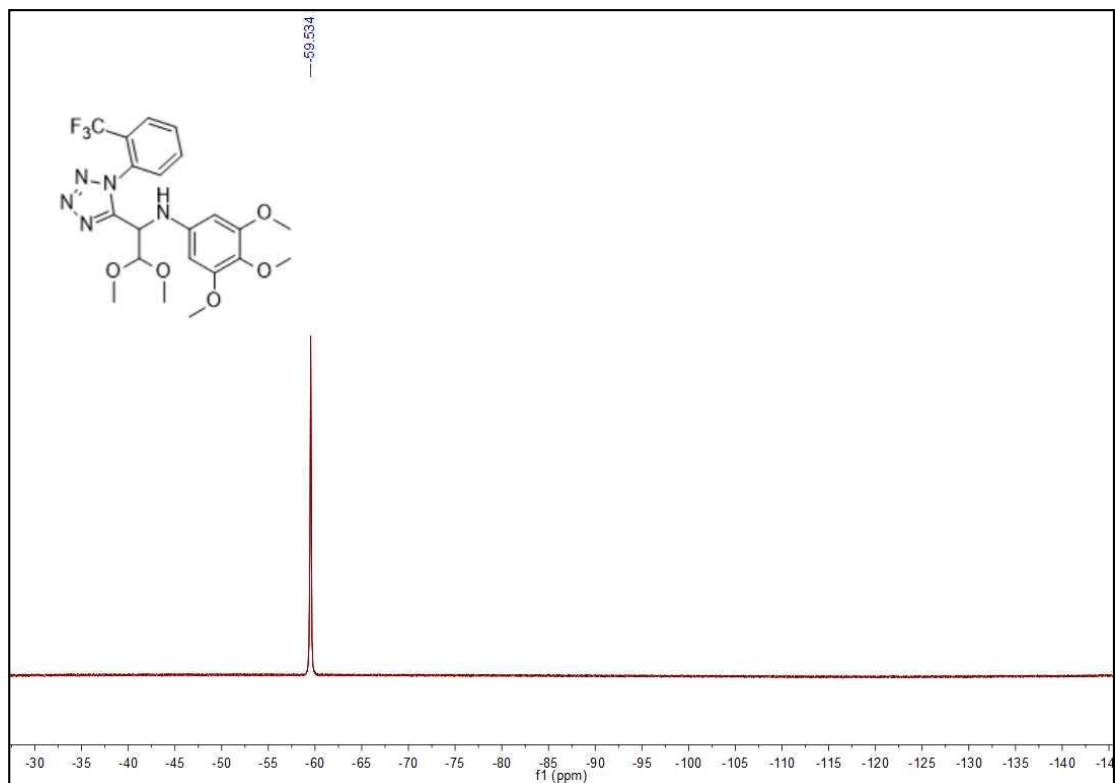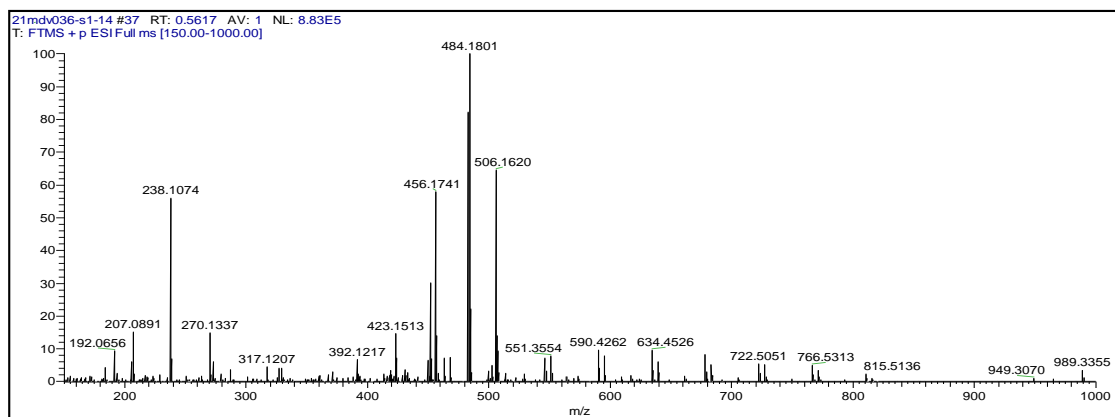

***N*-(2,2-dimethoxy-1-(1-(*o*-tolyl)-1*H*-tetrazol-5-yl)ethyl)-3,4,5-trimethoxyaniline (1o)**

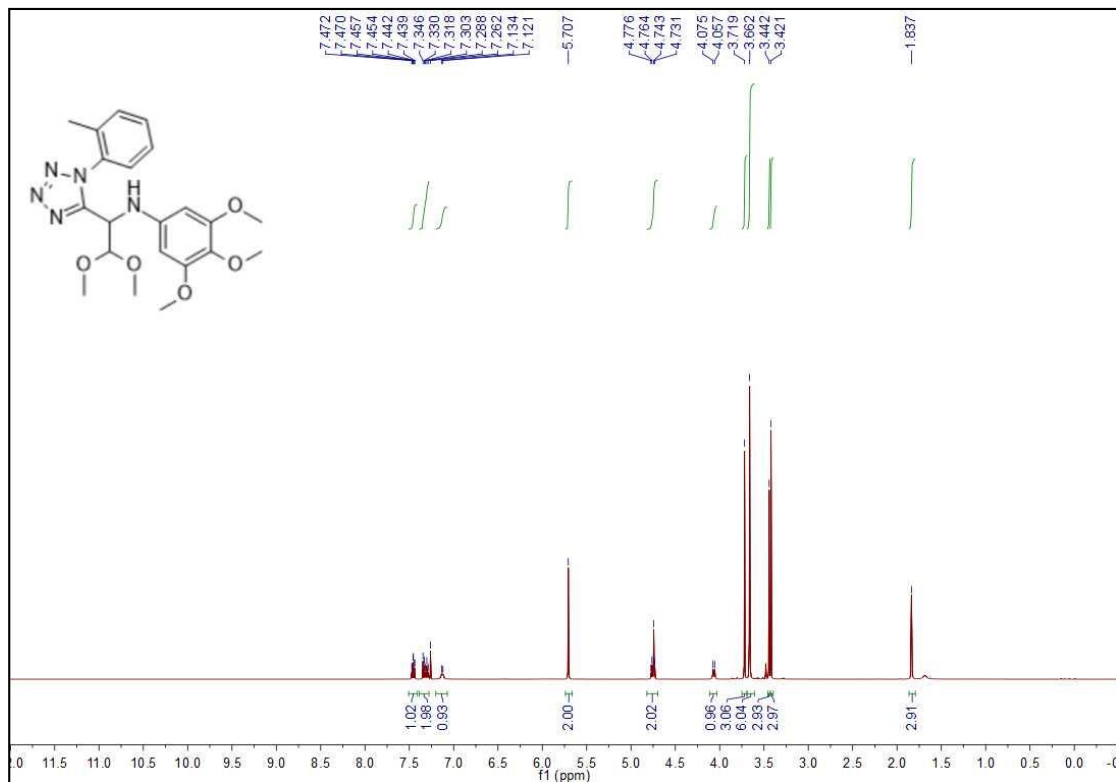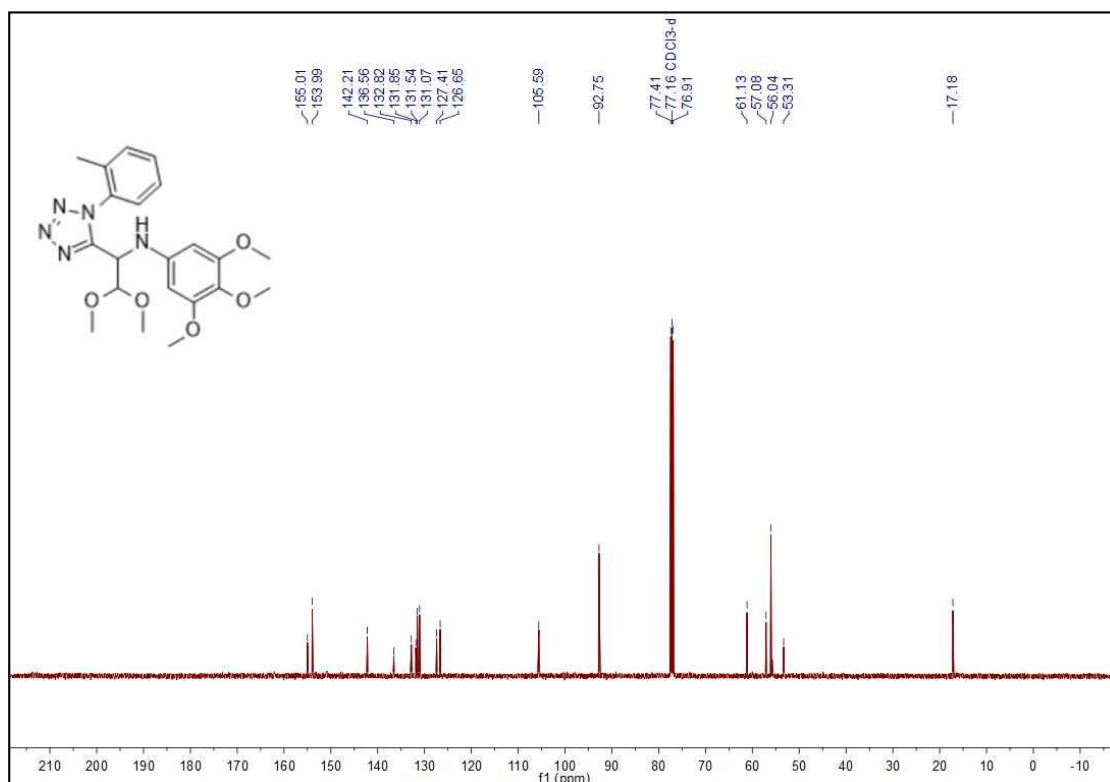

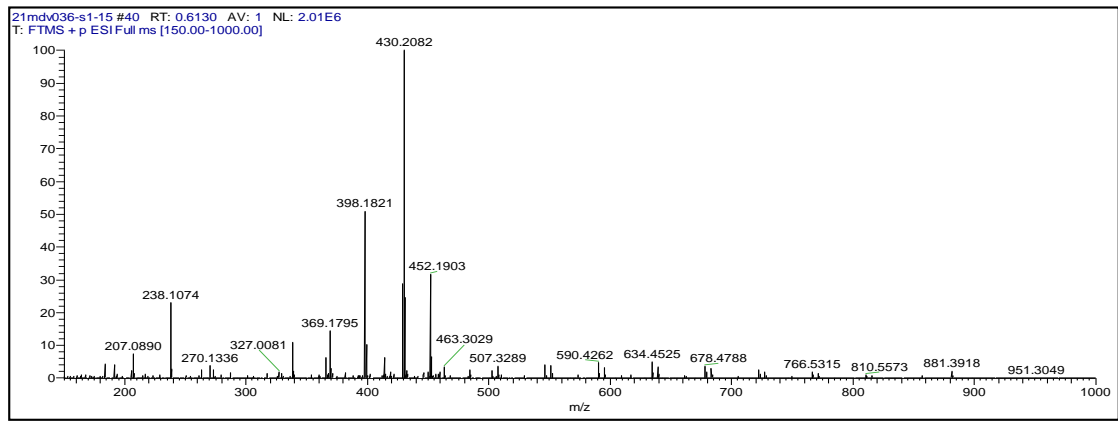

***N*-[1-(4-chlorophenyl)-1*H*-tetrazol-5-yl]-2,2-dimethoxyethyl)-2,4-dimethylaniline (1p)**

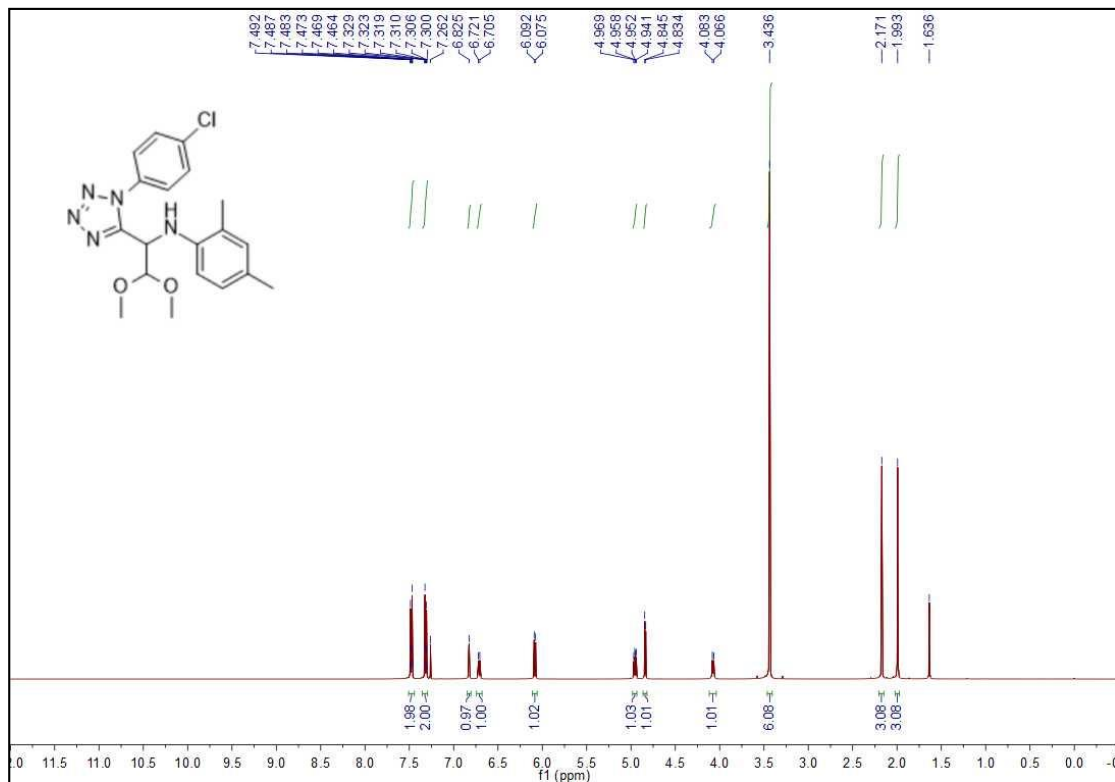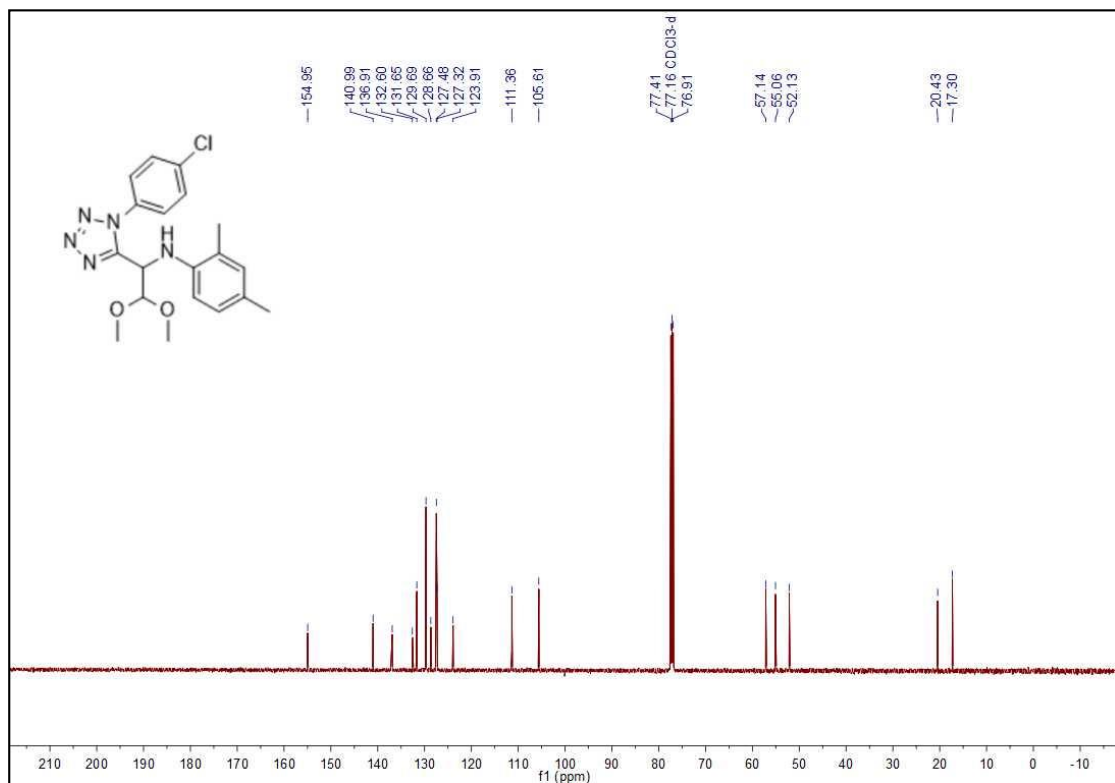

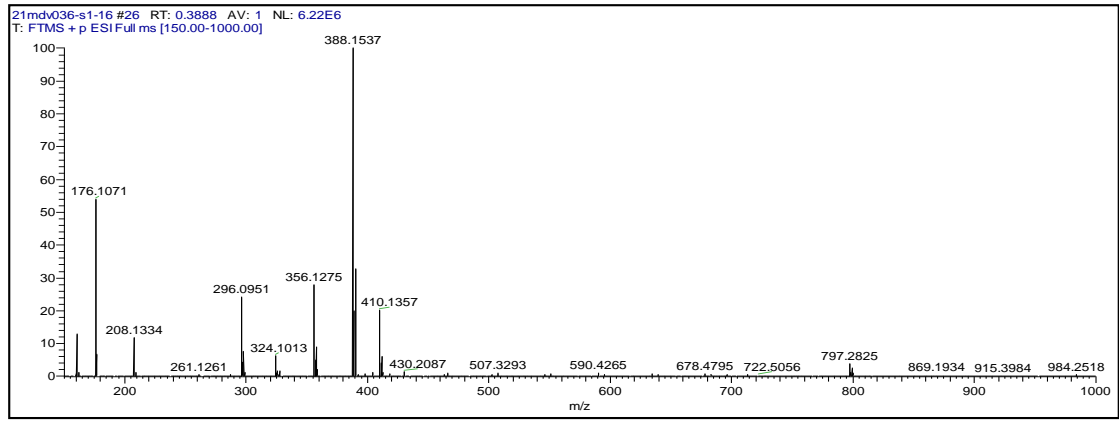

***N*-[1-(1-cyclohexyl-1*H*-tetrazol-5-yl)-2,2-dimethoxyethyl]-2,4-dimethylaniline (1q)**

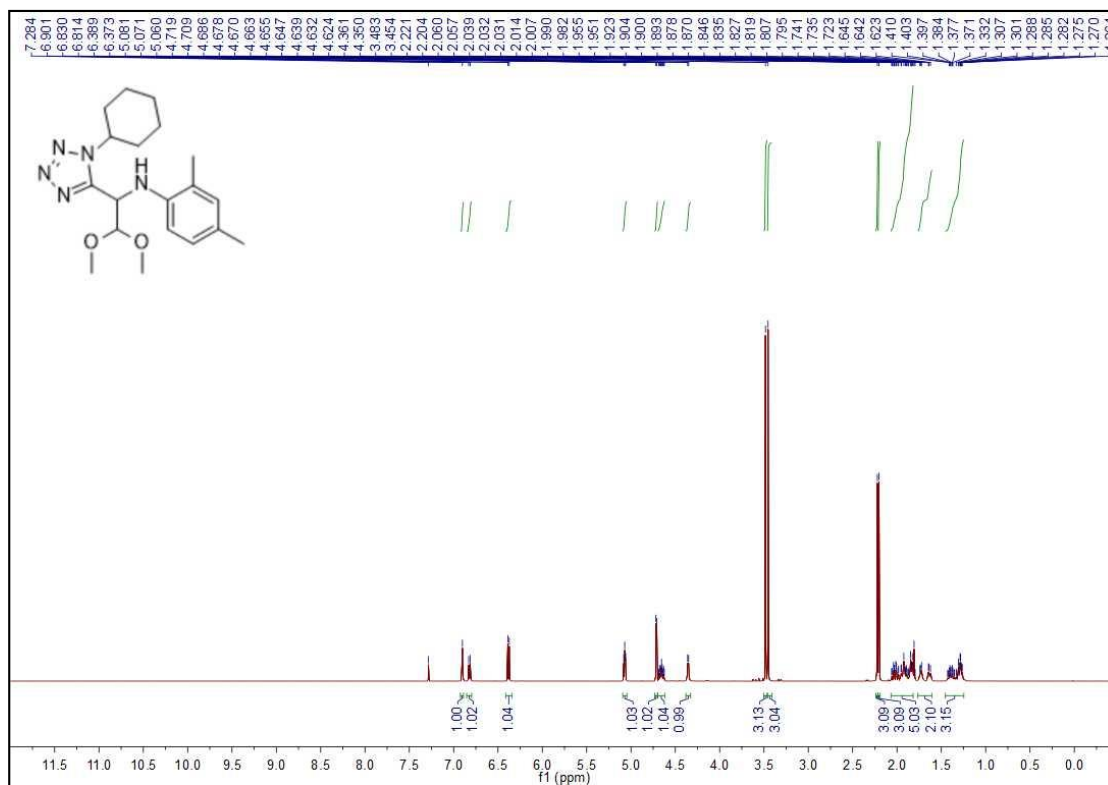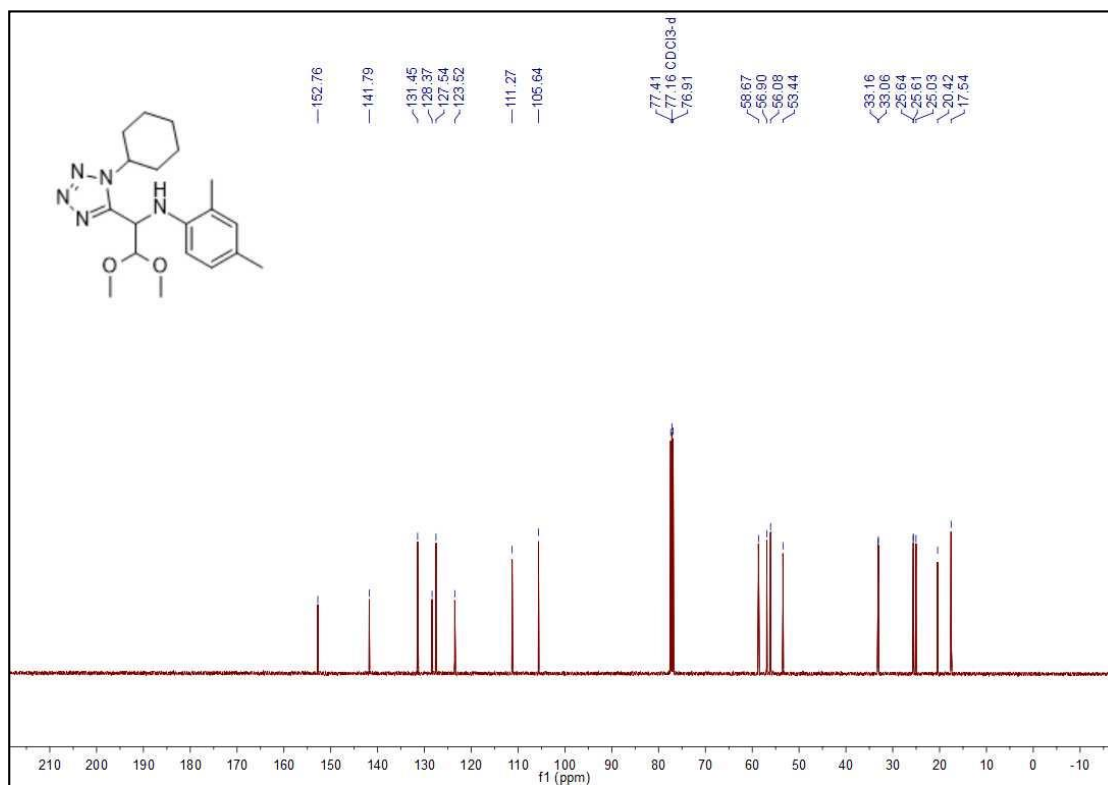

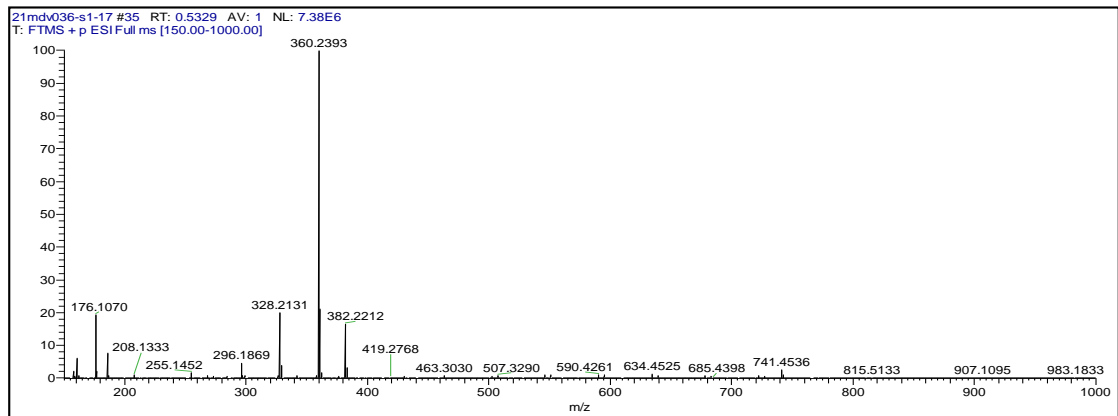

***N*-(1-(4-chlorophenyl)-1*H*-tetrazol-5-yl)-2,2-dimethoxyethyl)aniline (1r)**

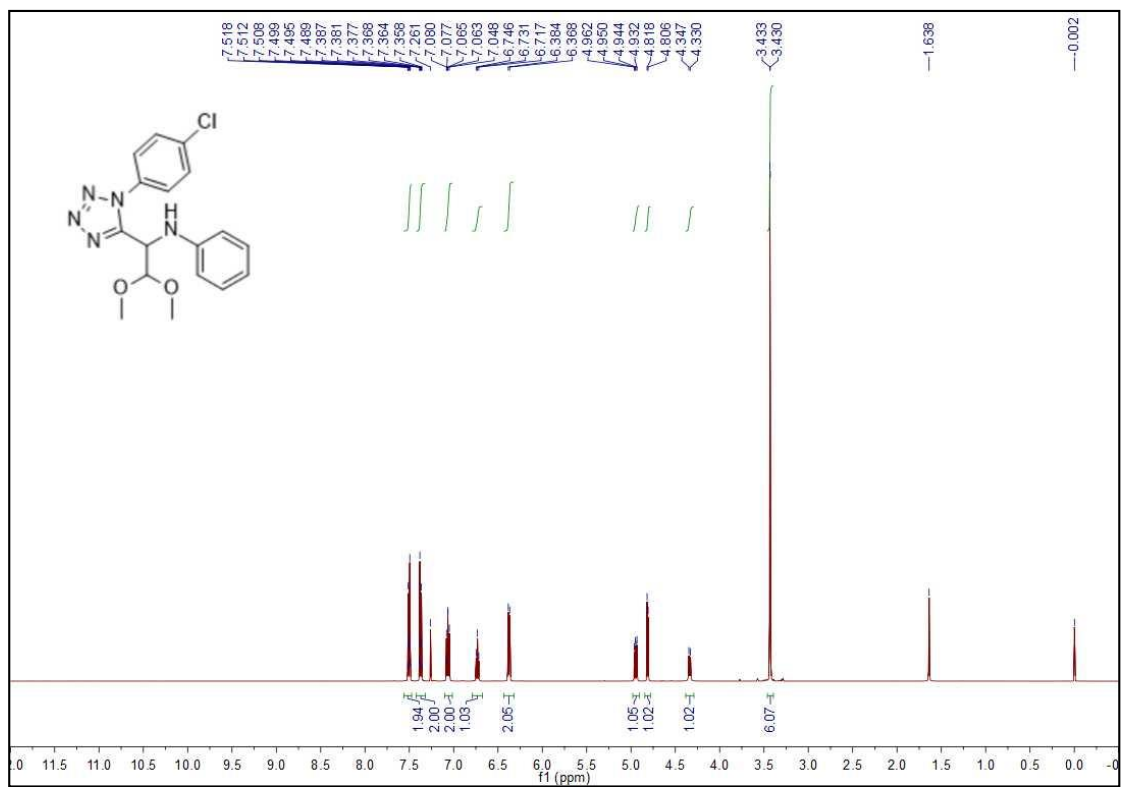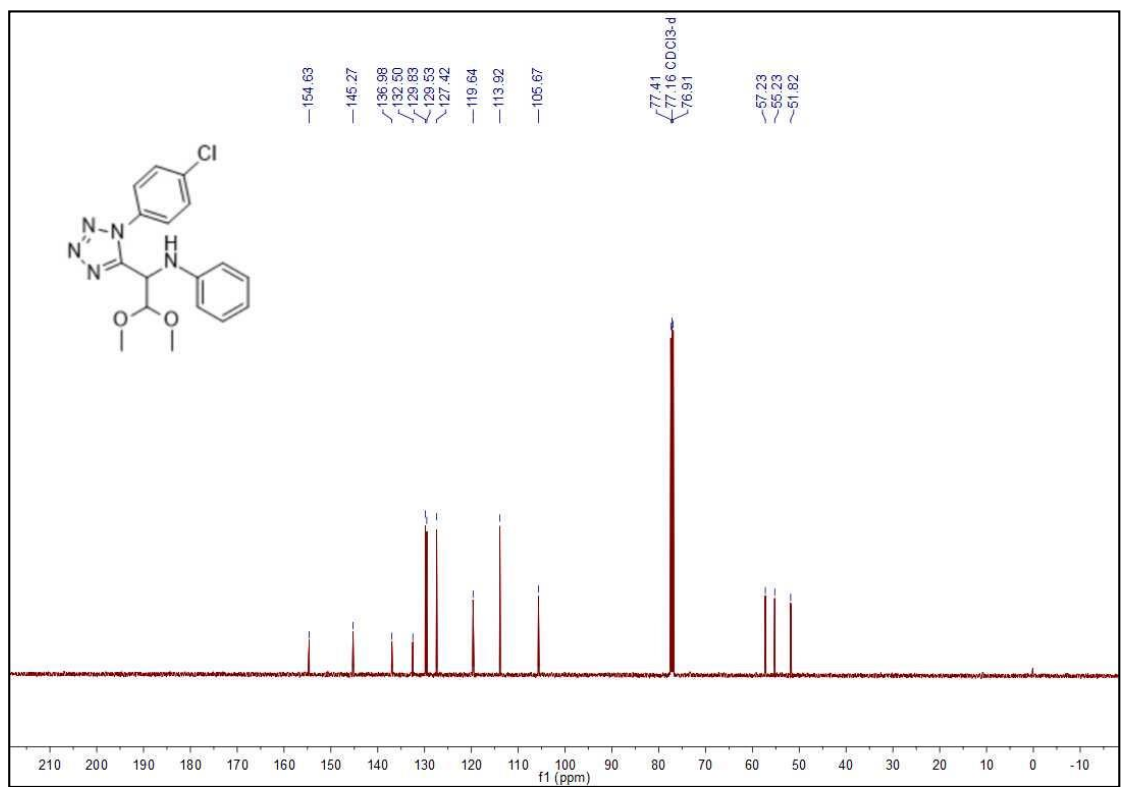



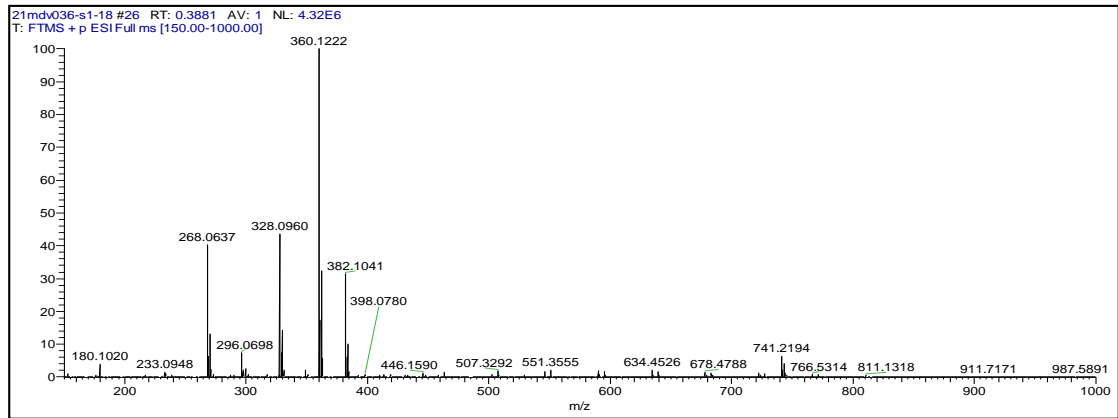

***N*-[1-(1-cyclohexyl-1*H*-tetrazol-5-yl)-2,2-dimethoxyethyl]aniline (1s)**

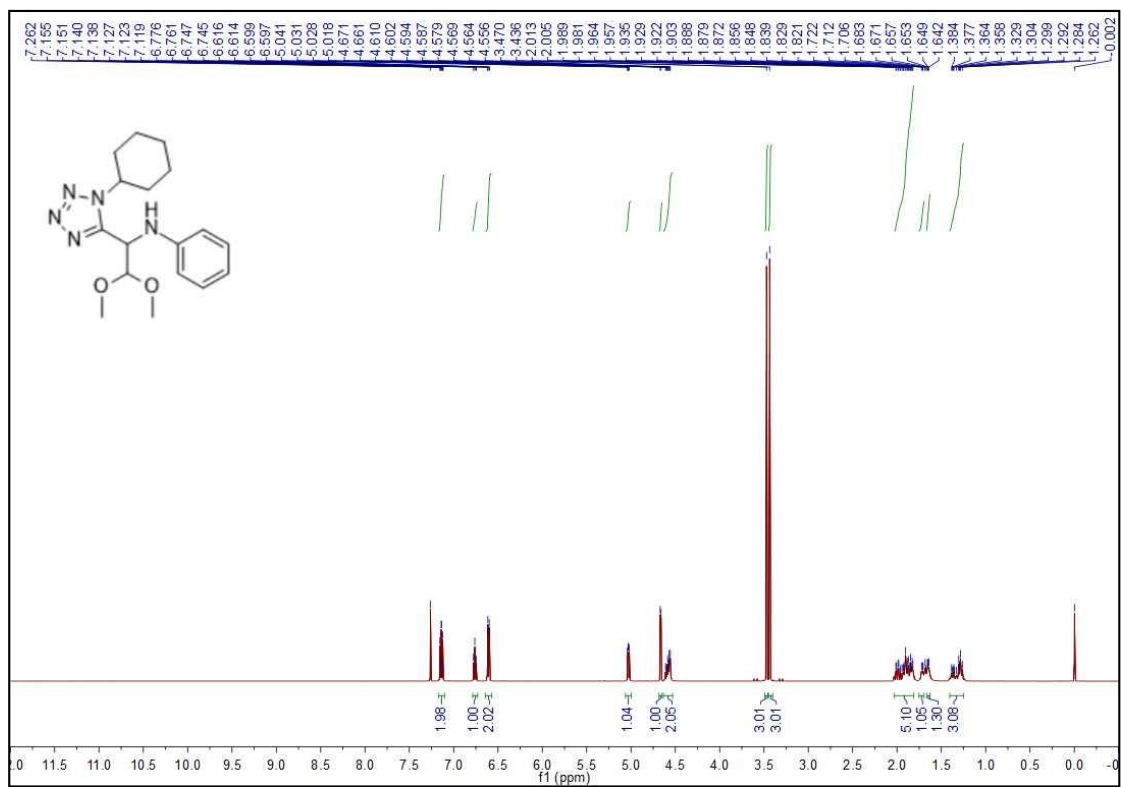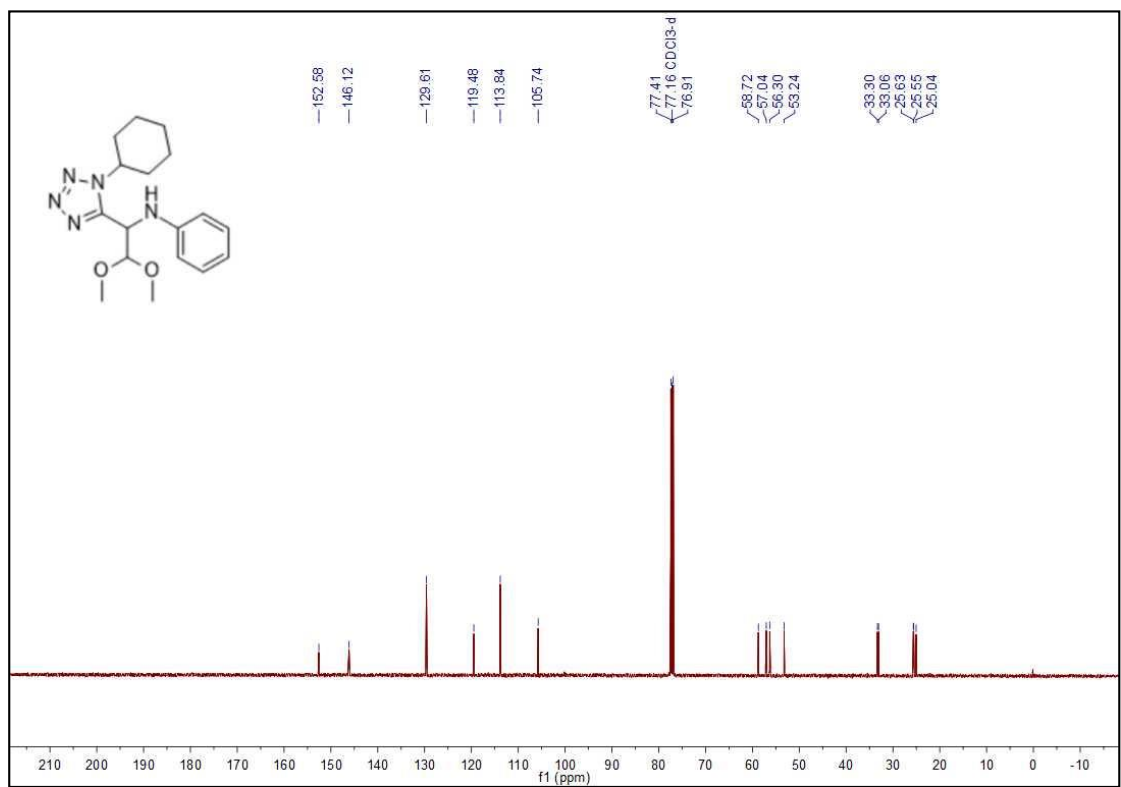

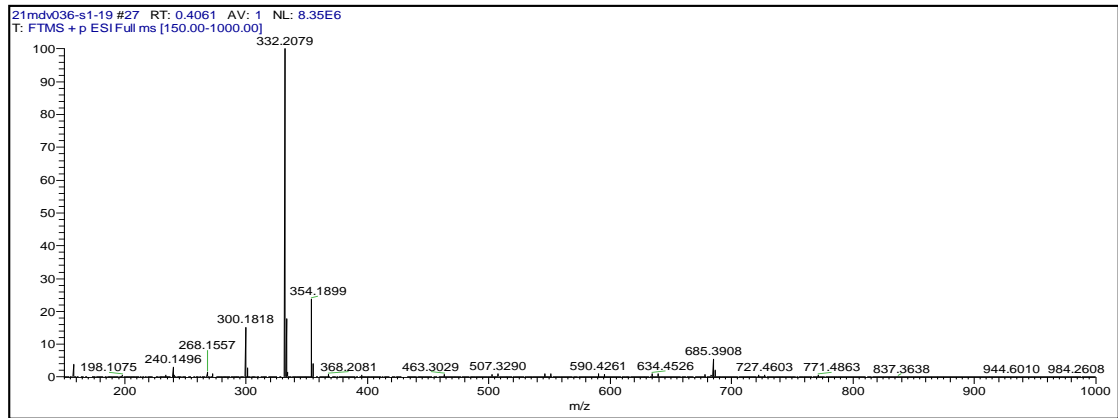

***N*-1-(1-(4-chlorobenzyl)-1*H*-tetrazol-5-yl)-2,2-dimethoxyethyl)-3-methoxyaniline (1t)**

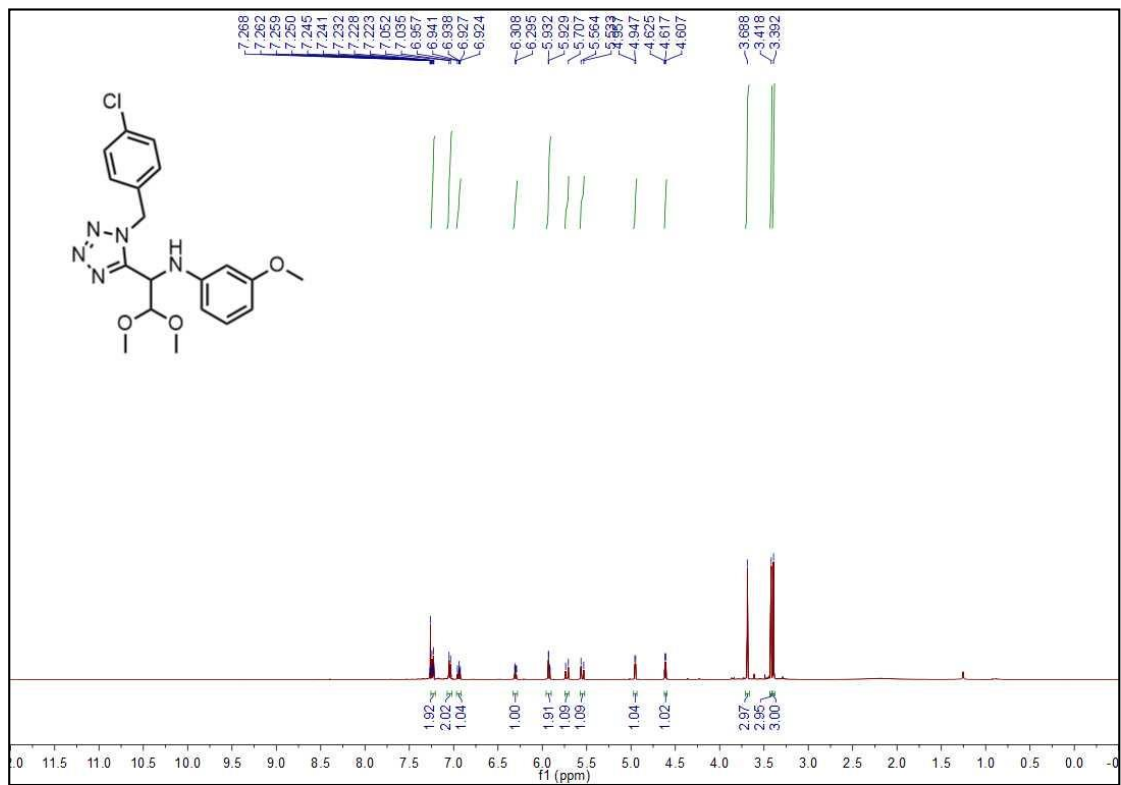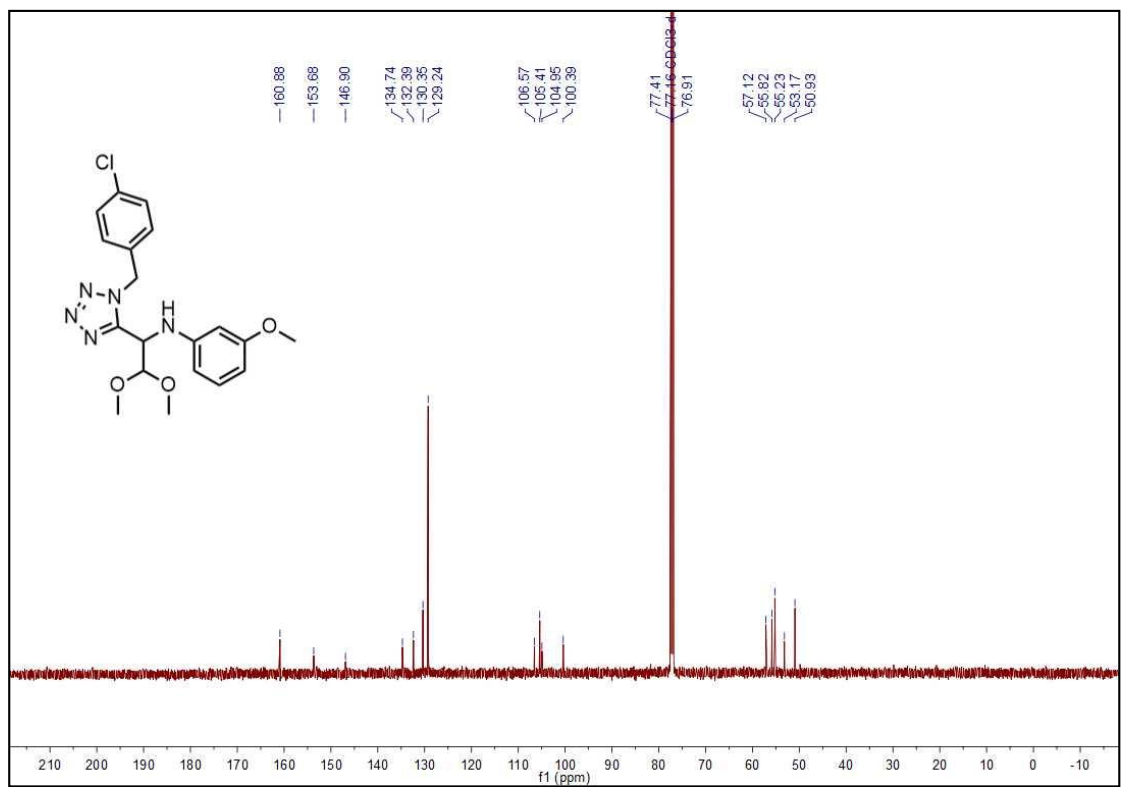

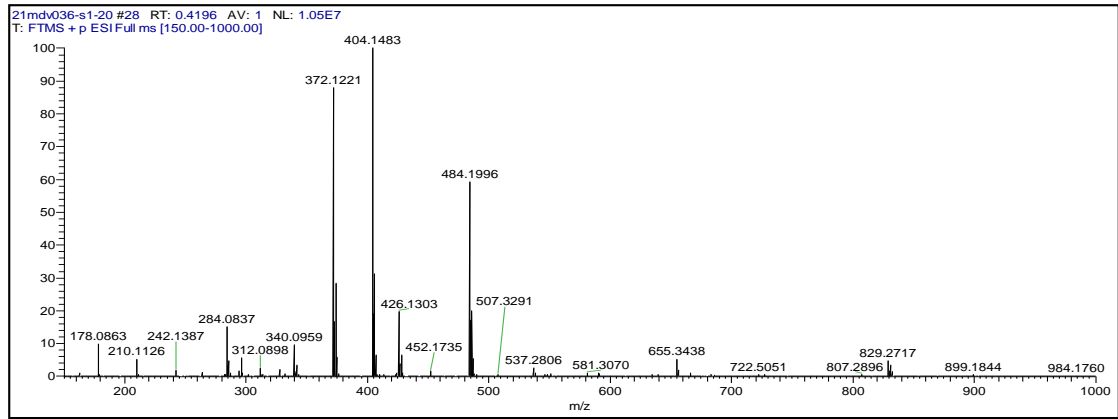

***N*-(1-(1-benzyl-1*H*-tetrazol-5-yl)-2,2-dimethoxyethyl)-3-methylaniline (1u)**

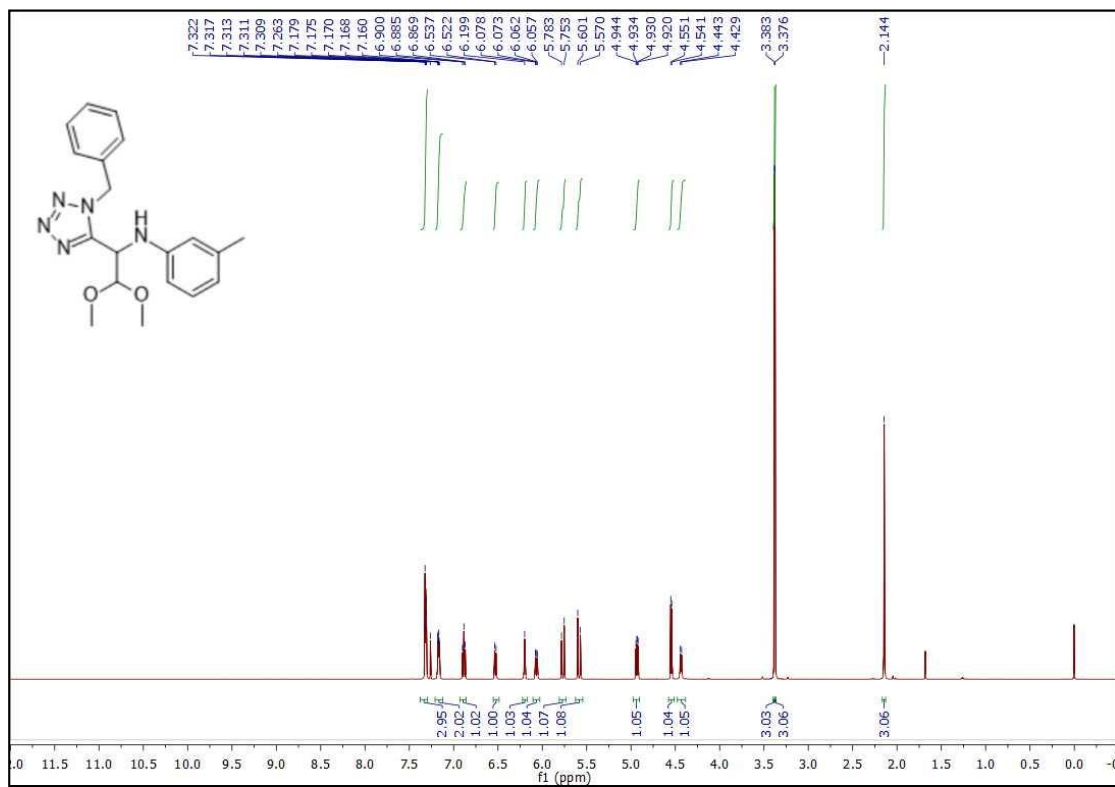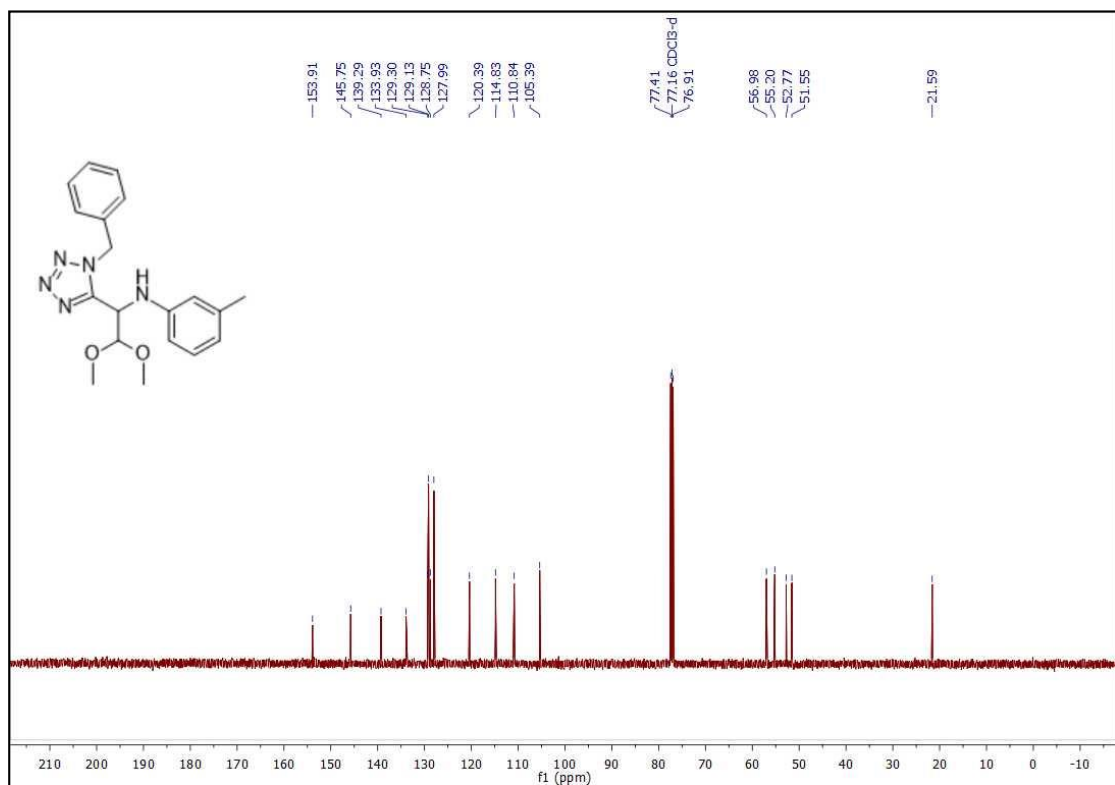

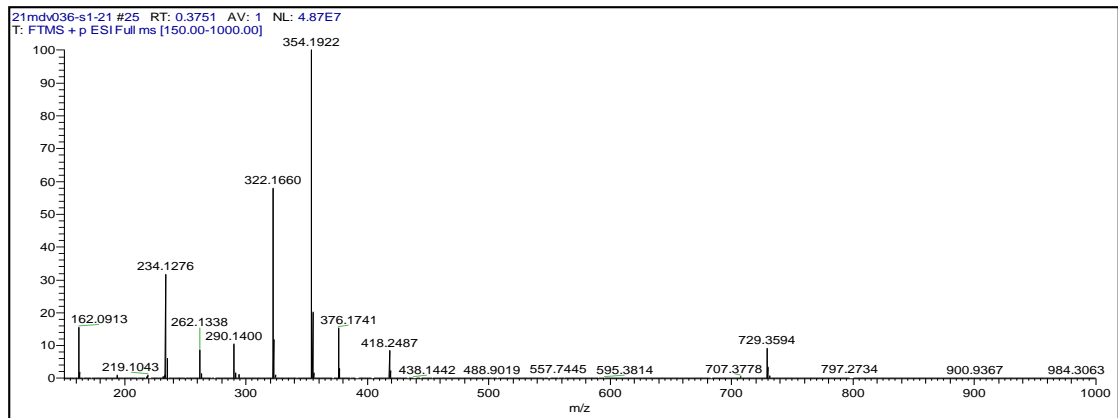





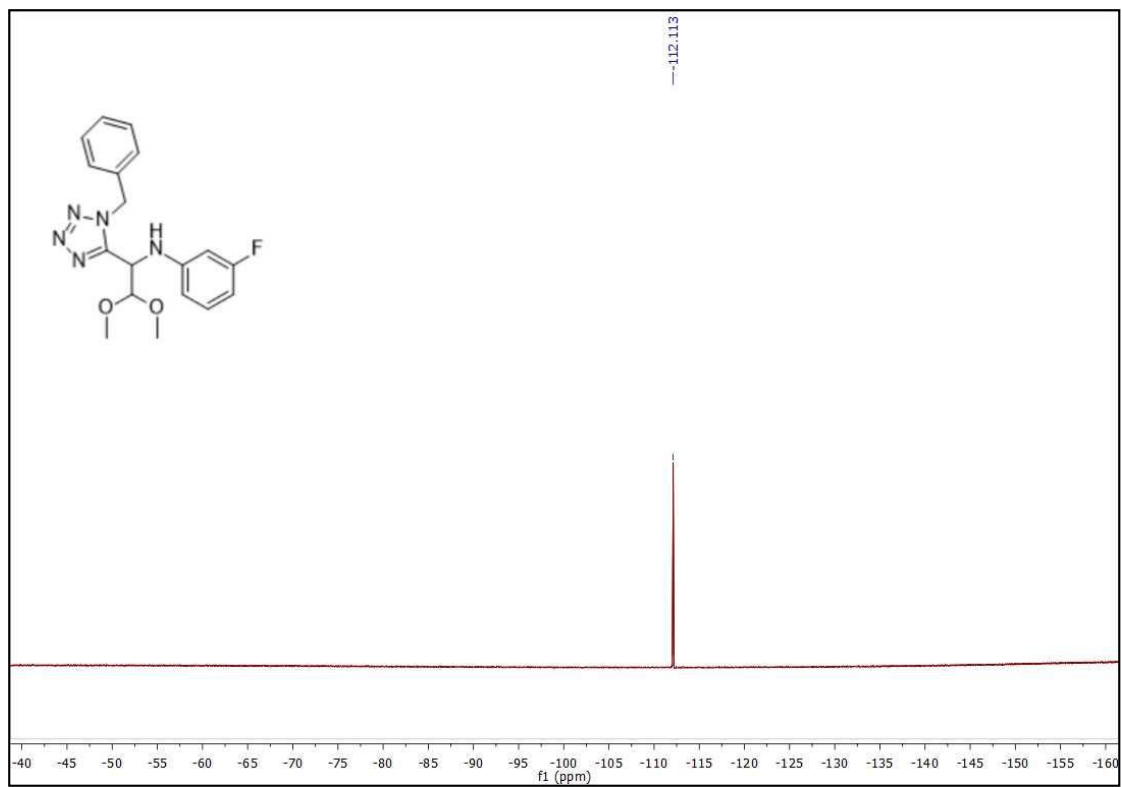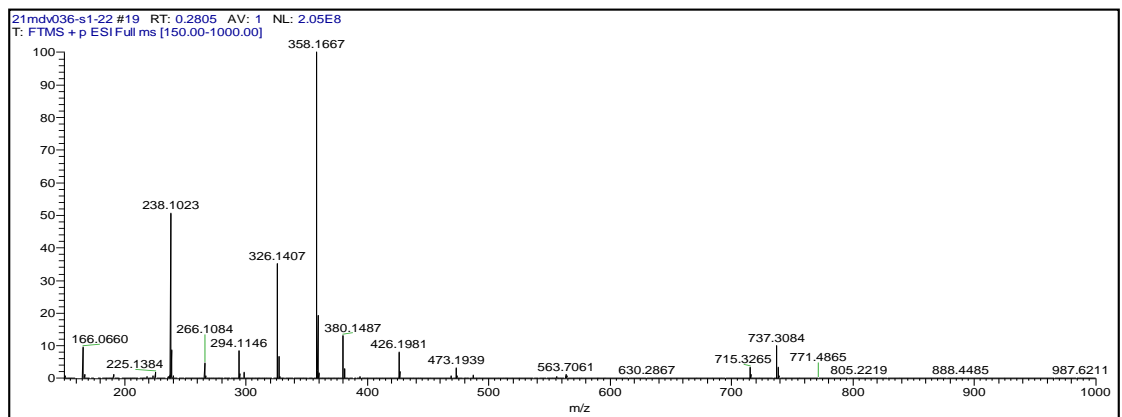

***N*-[1-(1-benzyl-1*H*-tetrazol-5-yl)-2,2-dimethoxyethyl]-3-chloroaniline (1w)**

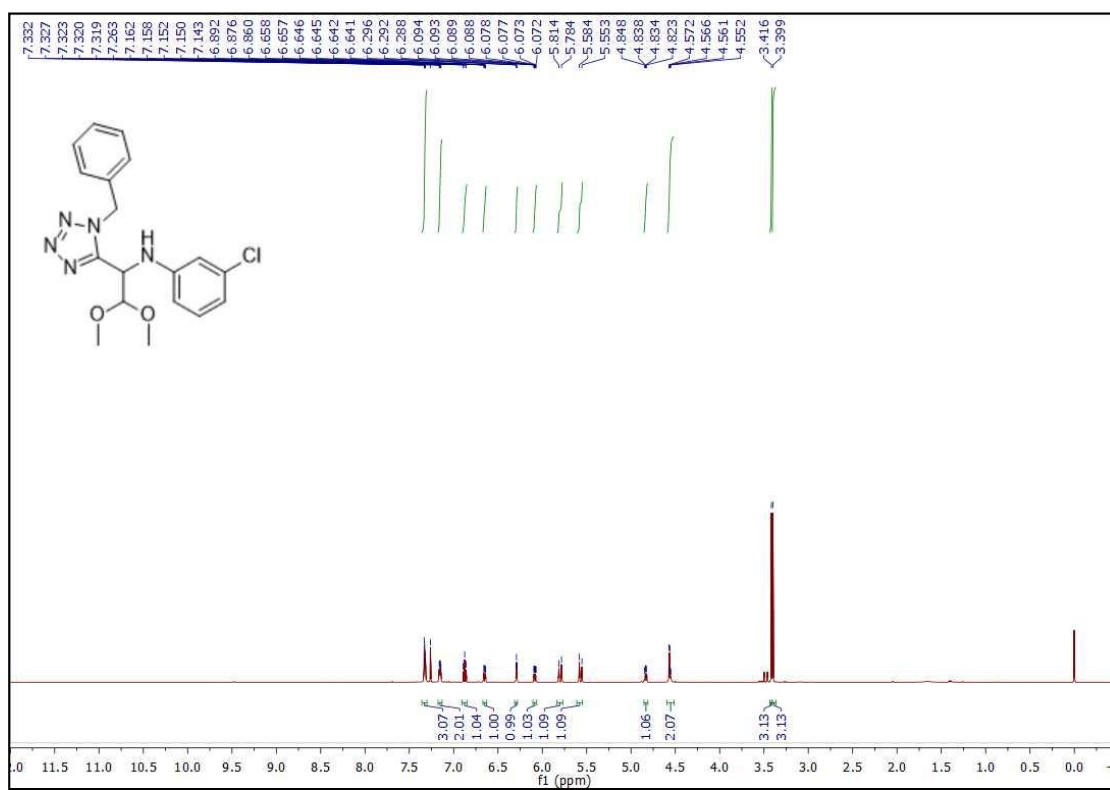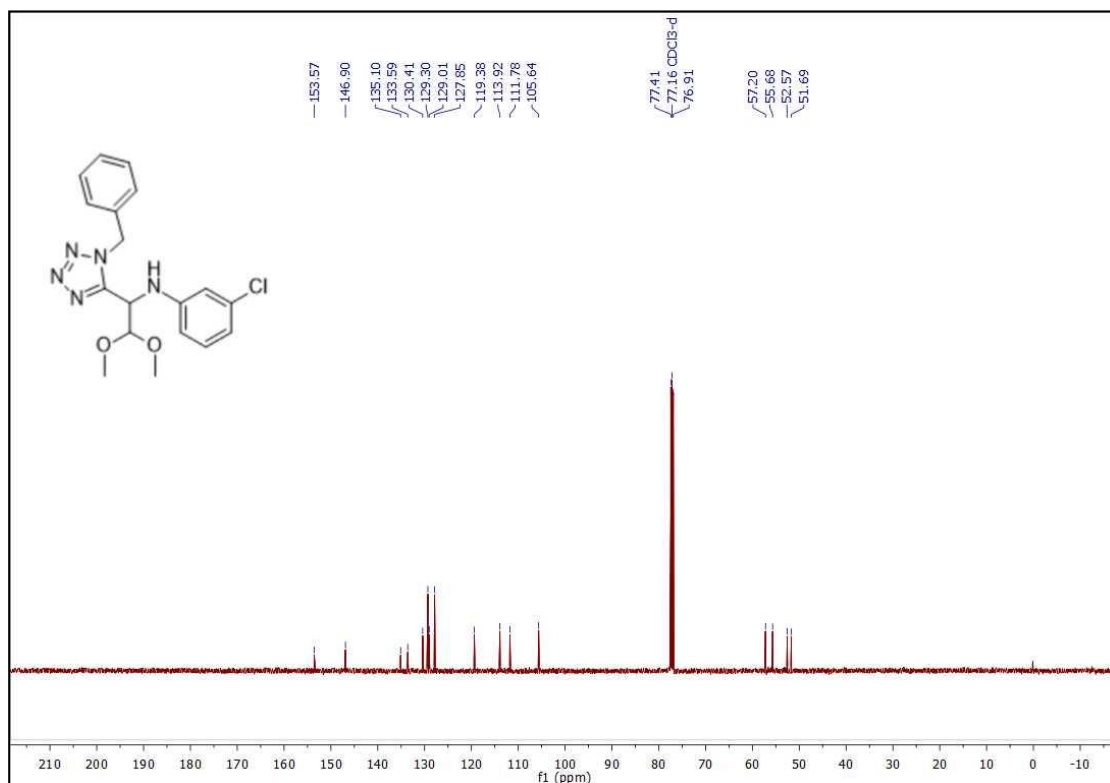

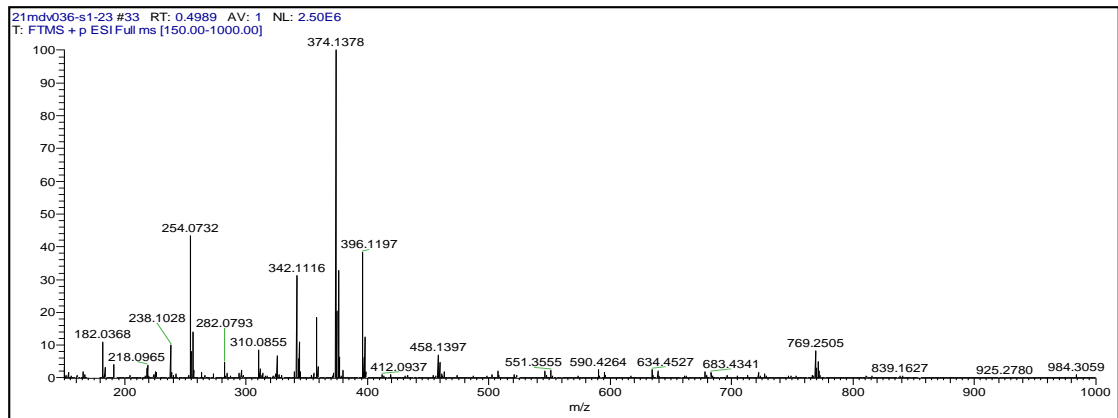

# *N*-(1-(1-benzyl-1*H*-tetrazol-5-yl)-2,2-dimethoxyethyl)-3-bromoaniline (1x)

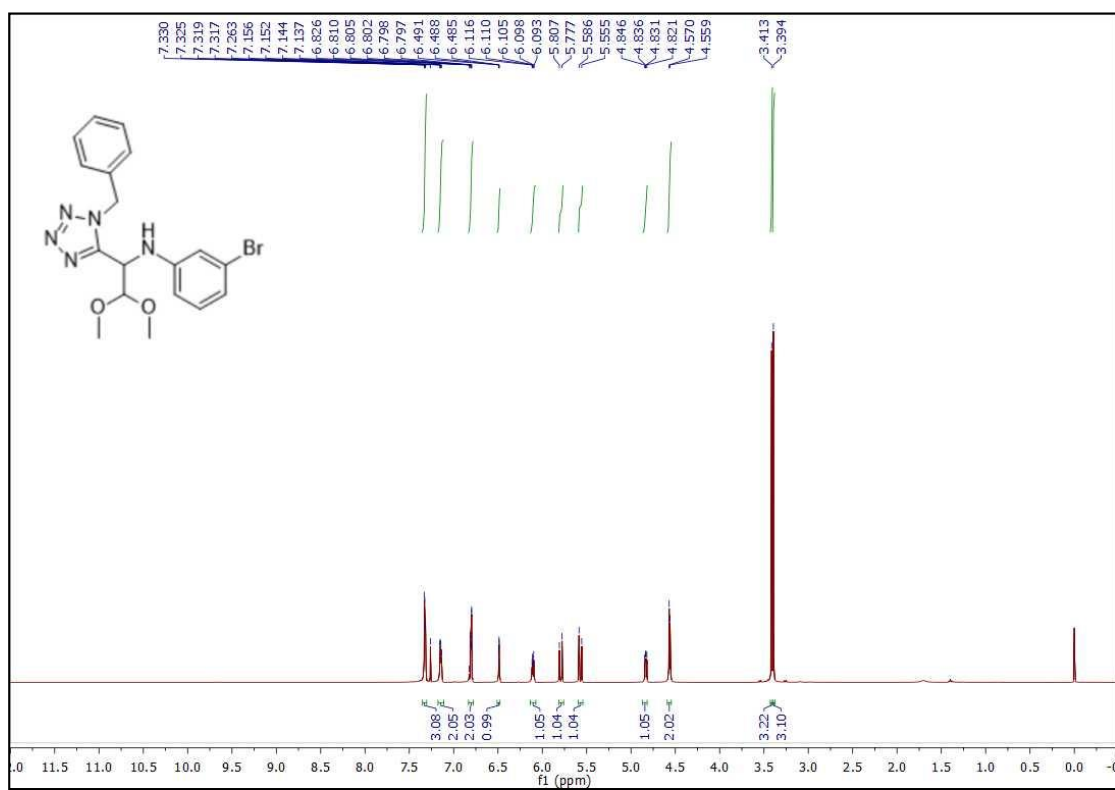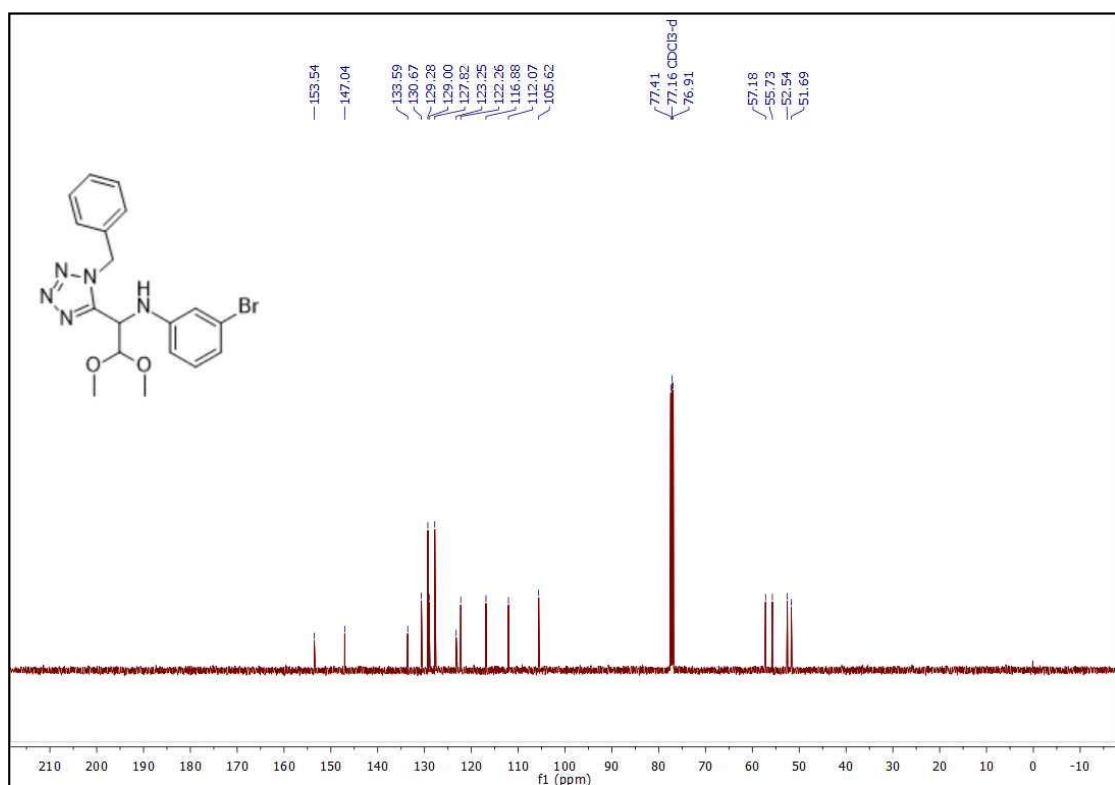

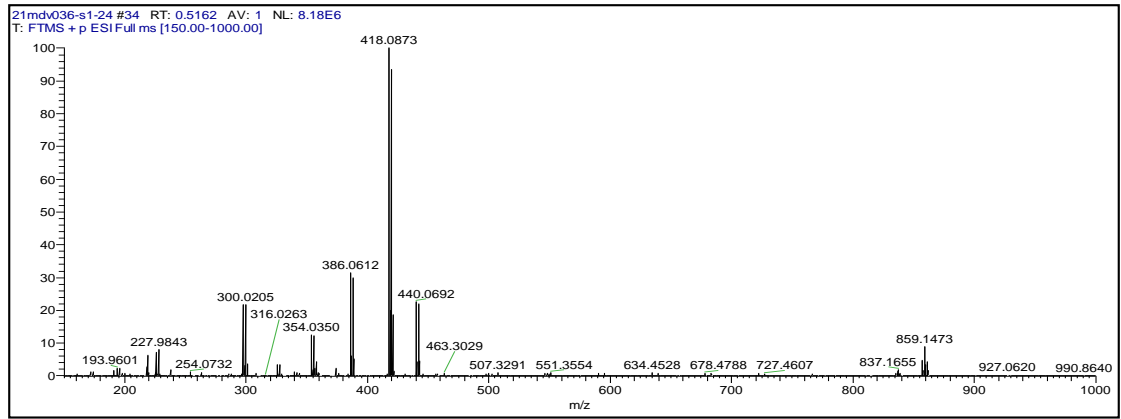

# *N*-(1-(1-benzyl-1*H*-tetrazol-5-yl)-2,2-dimethoxyethyl)-3-isopropylaniline (1y)

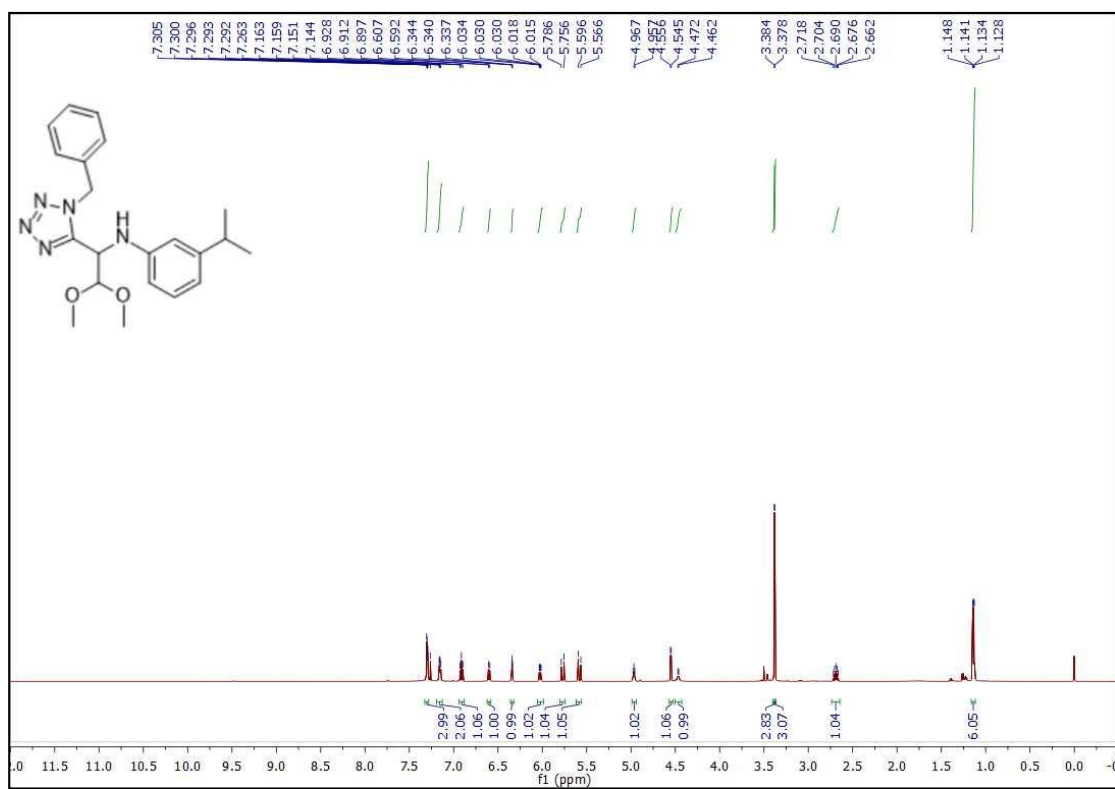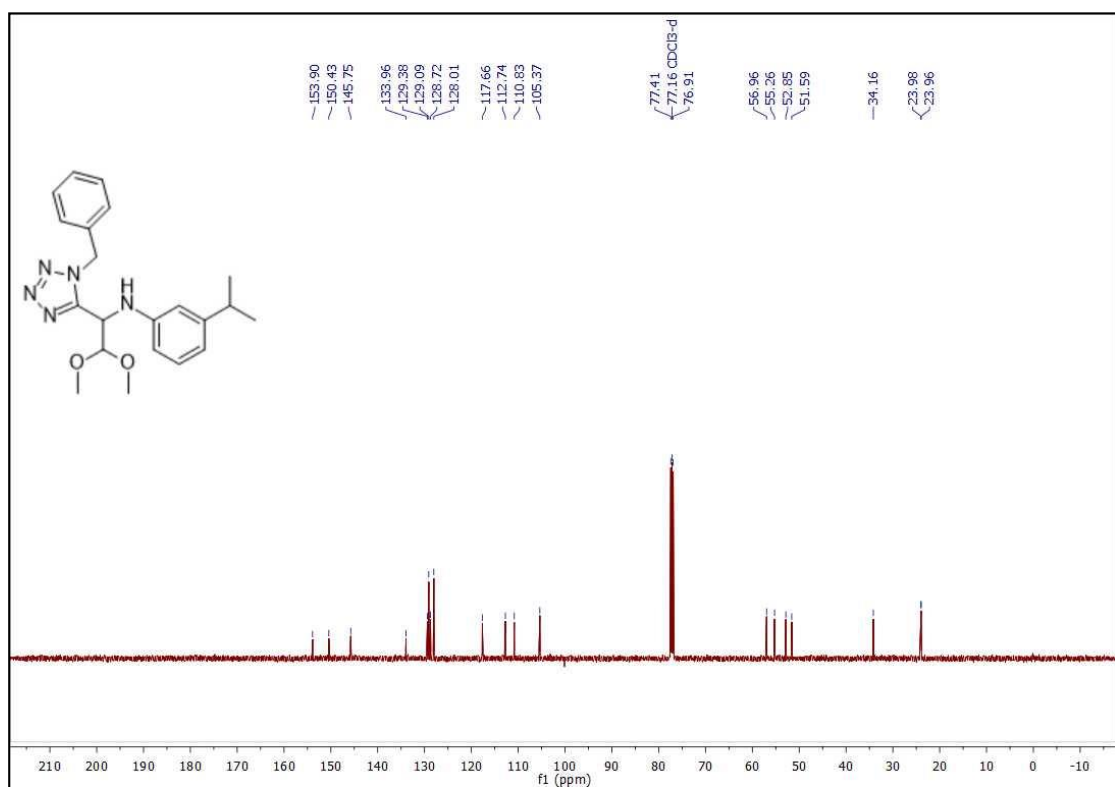

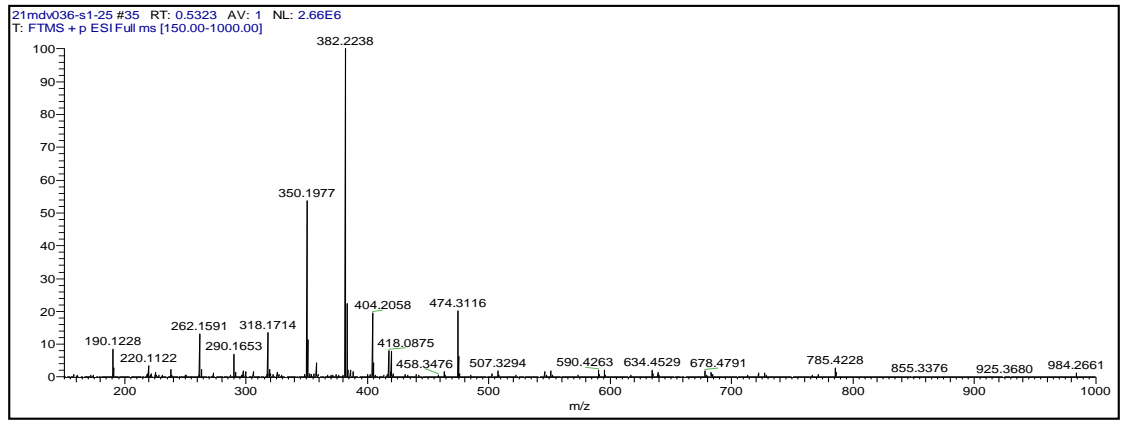

## 2-(1-benzyl-1H-tetrazol-5-yl)-4,5,6-trimethoxy-1H-indole (2a)

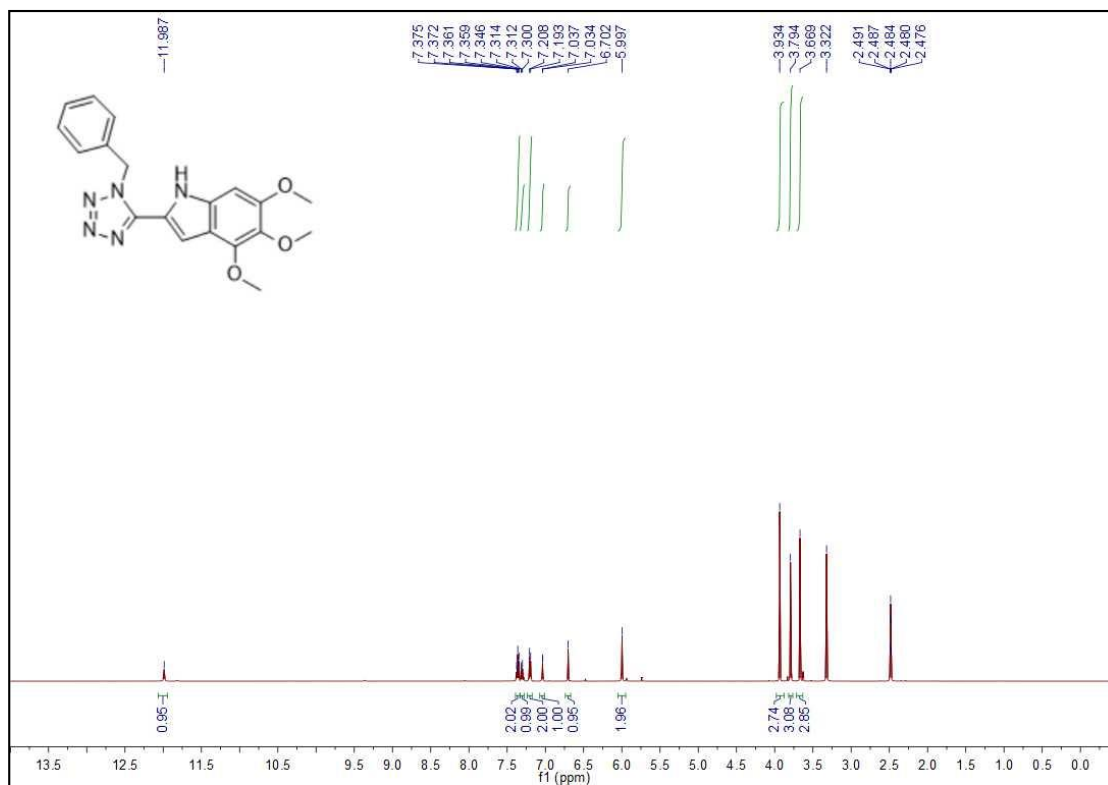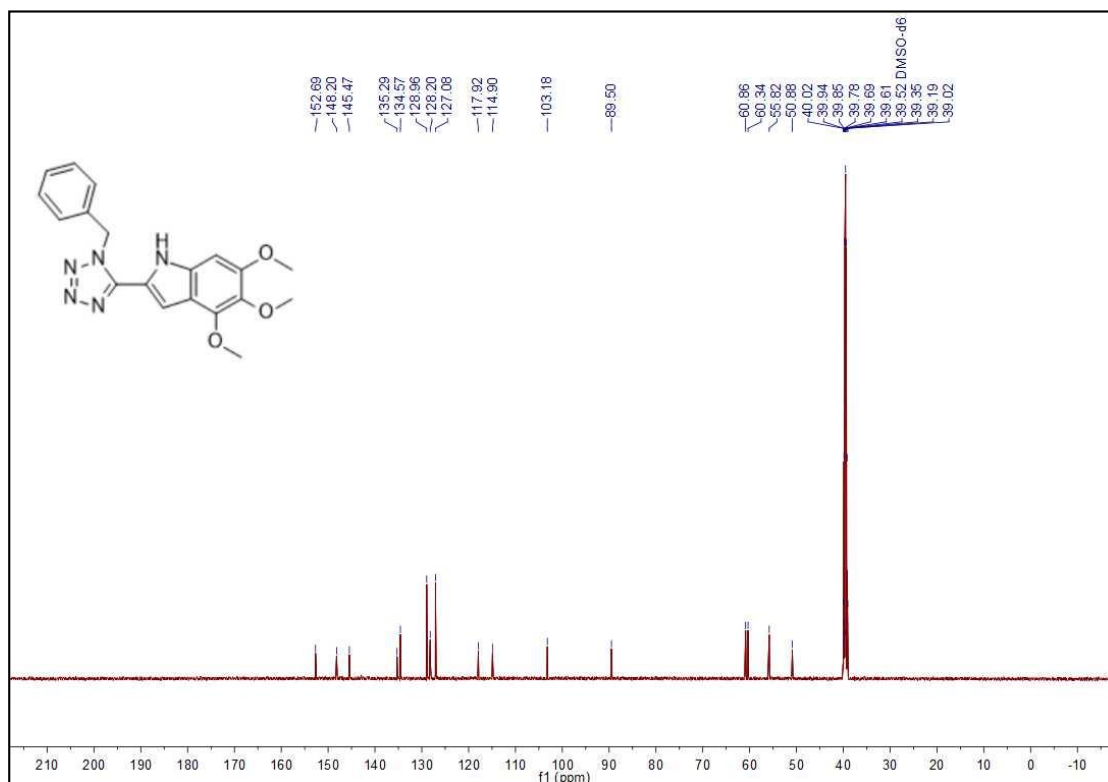



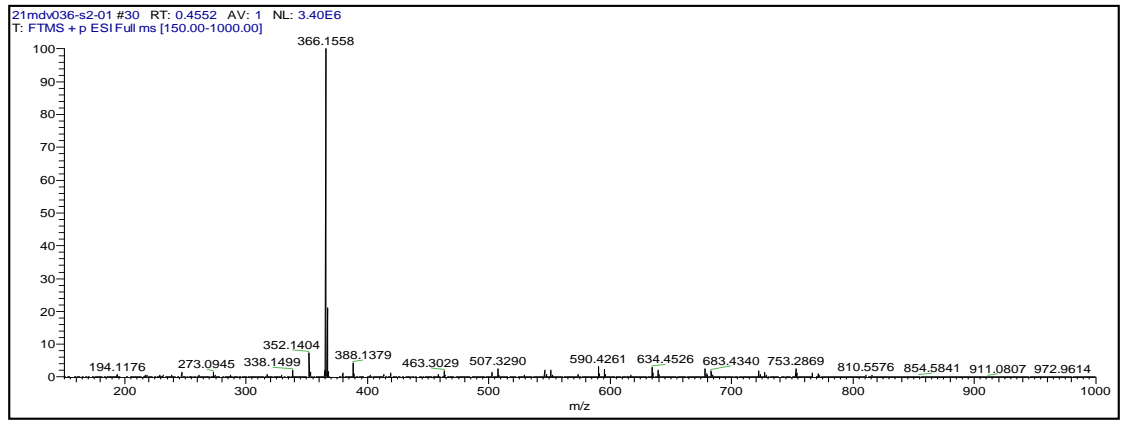



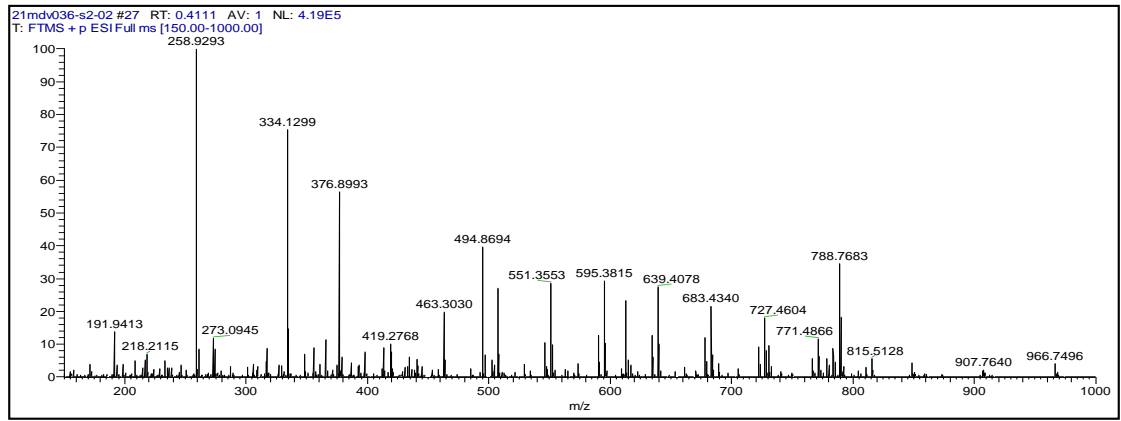

## 2-(1-benzyl-1H-tetrazol-5-yl)-6-methoxy-1H-indole (2c-1)

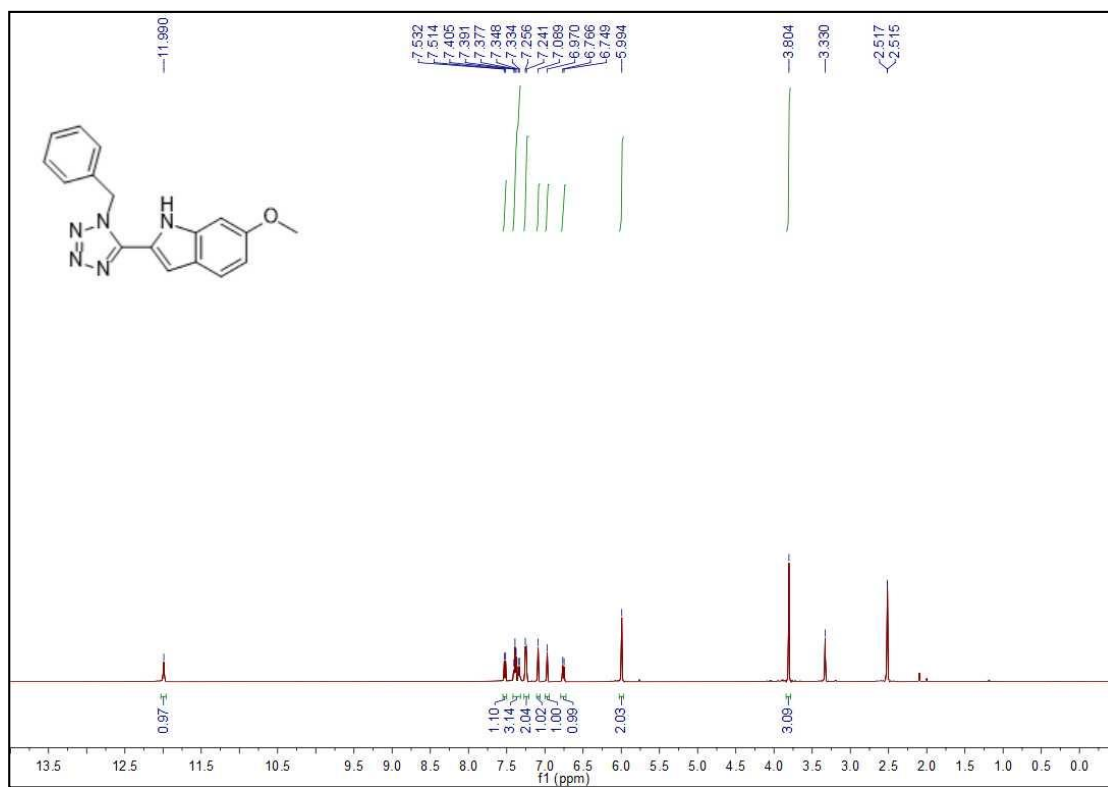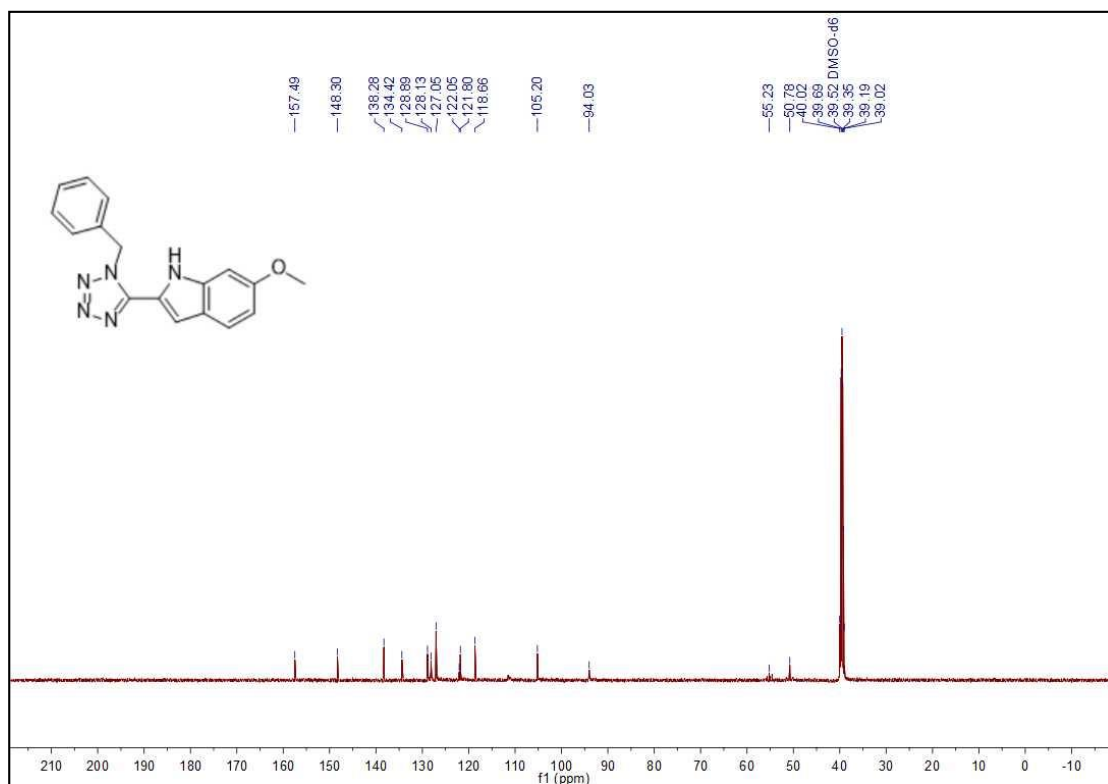

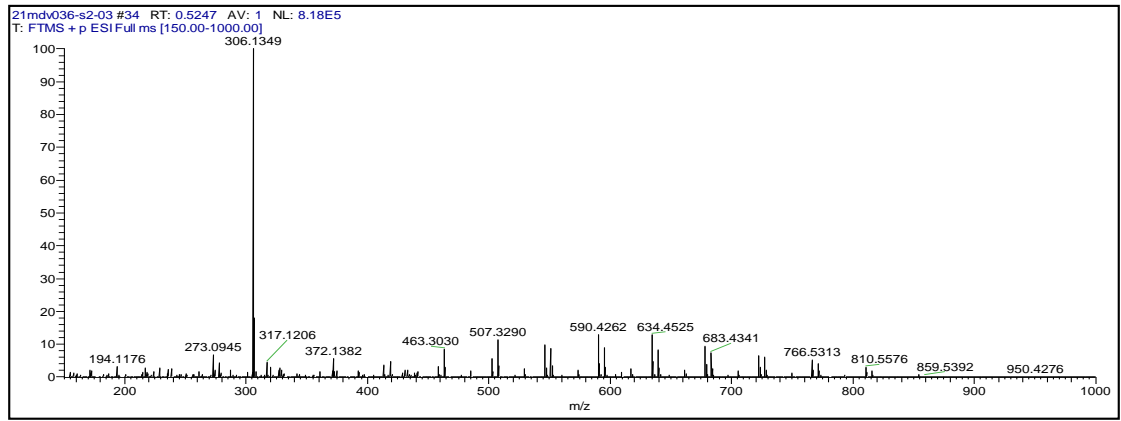

## 2-(1-benzyl-1H-tetrazol-5-yl)-5-chloro-1H-indole (2d)

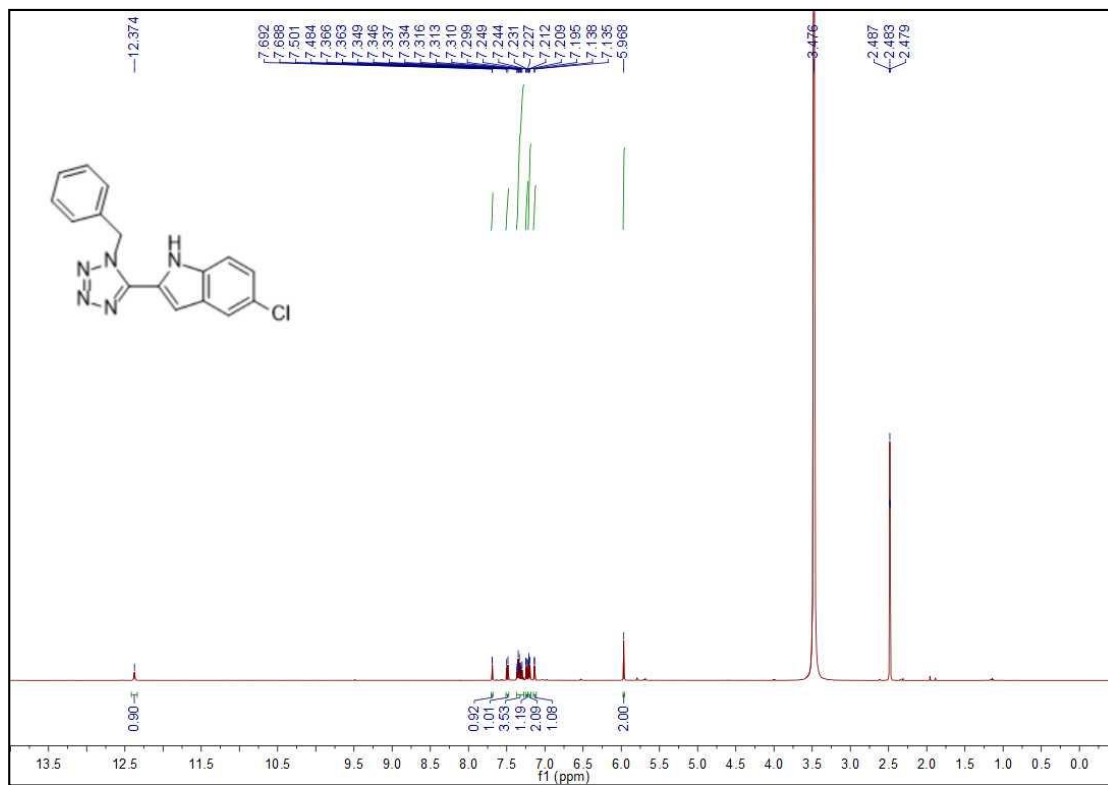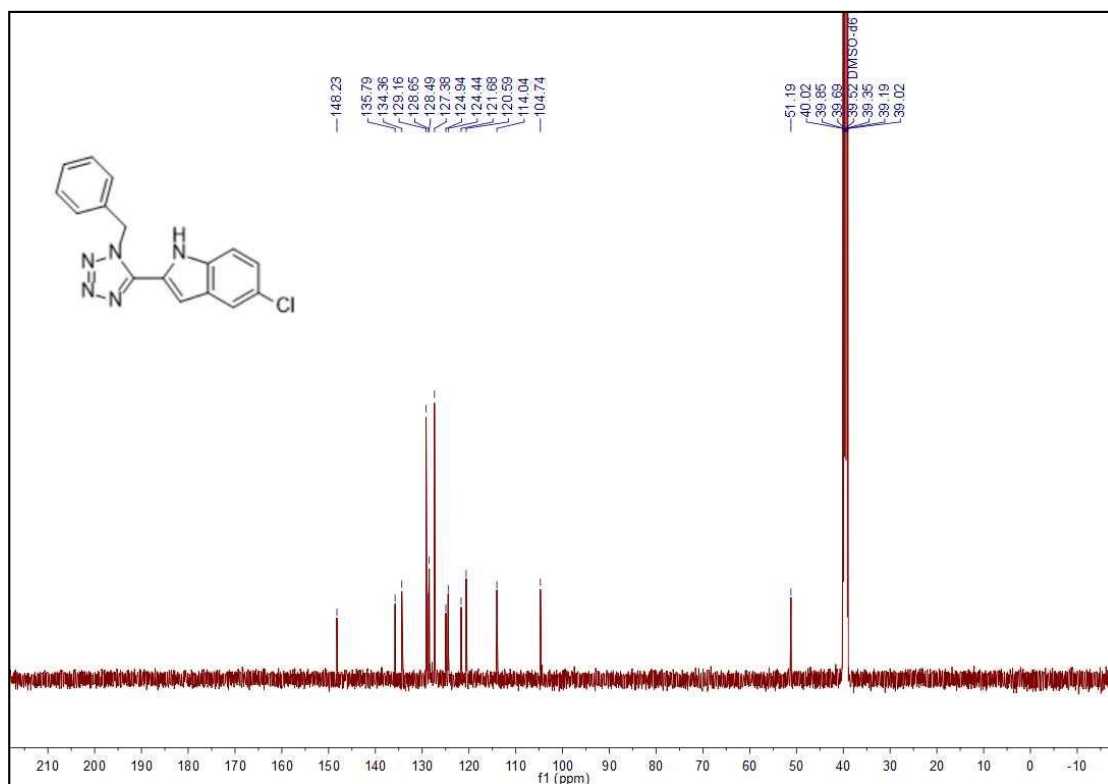

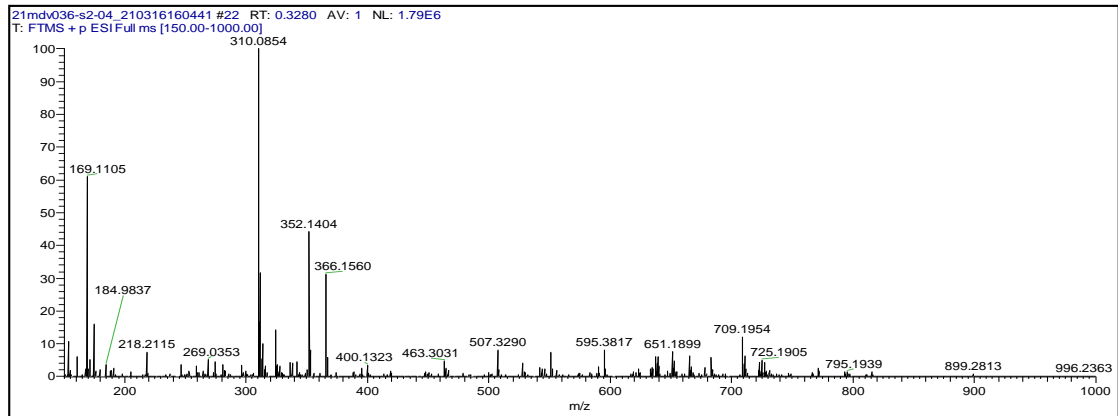

## 2-(1-benzyl-1H-tetrazol-5-yl)-5,7-dimethyl-1H-indole (2e)

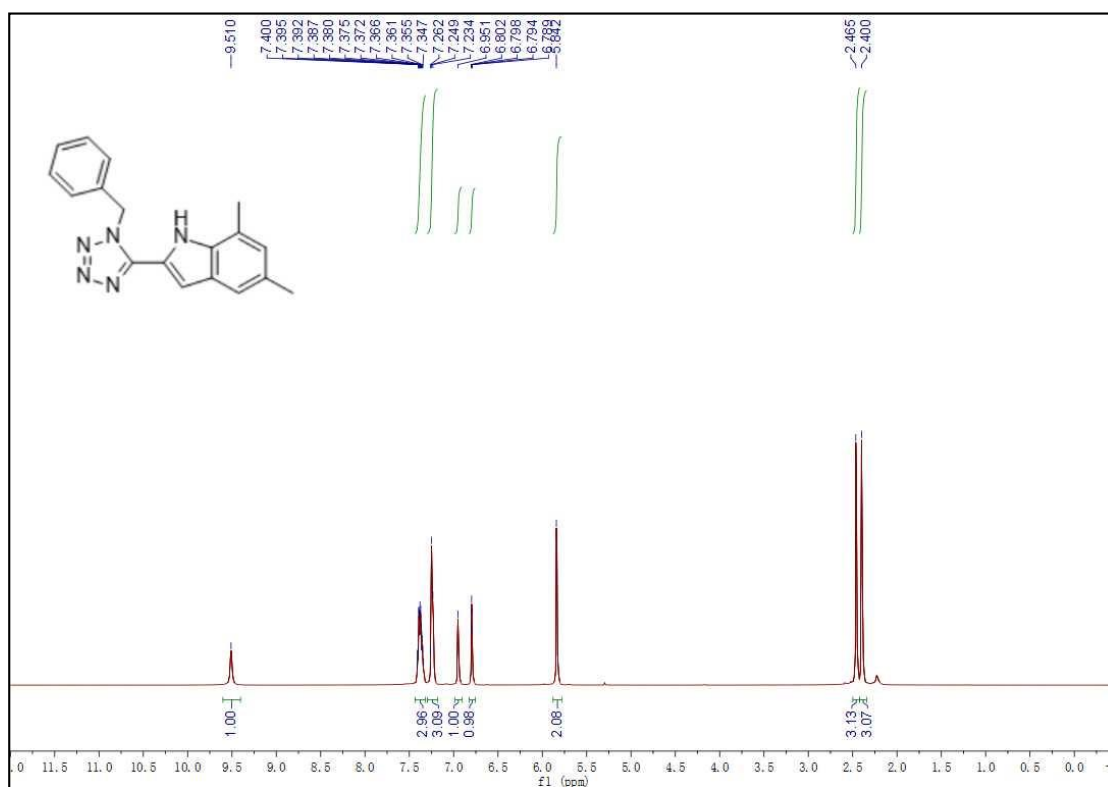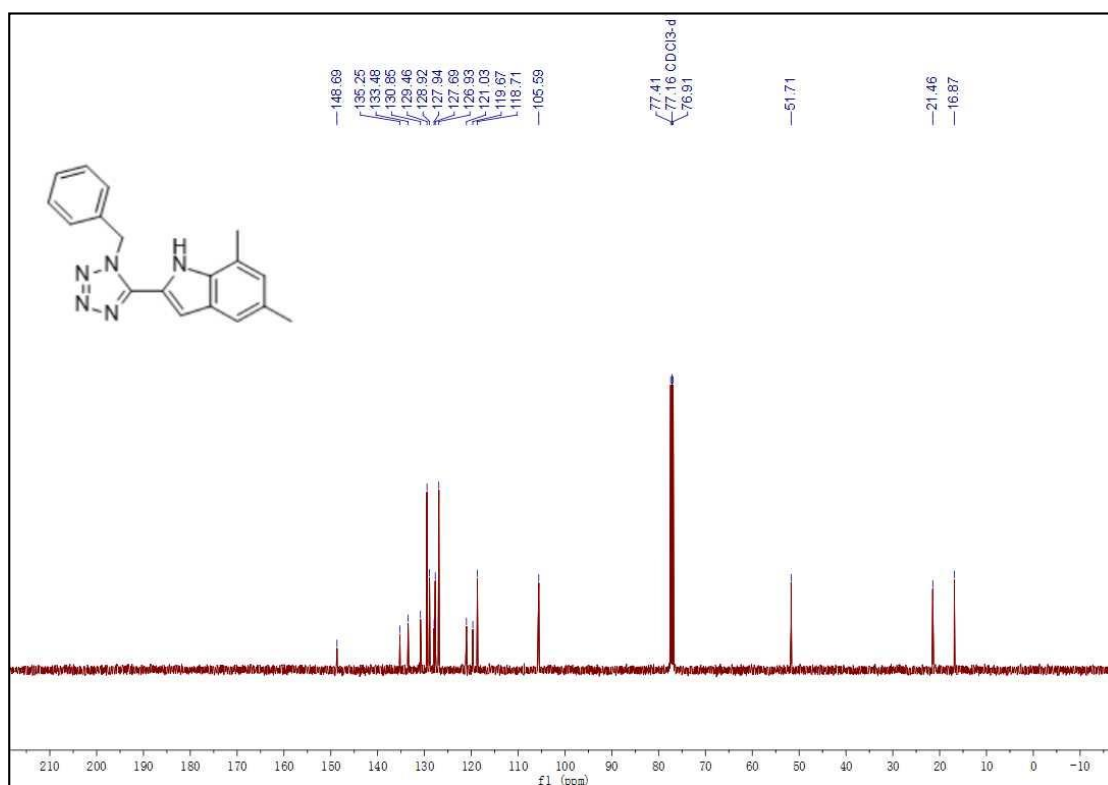



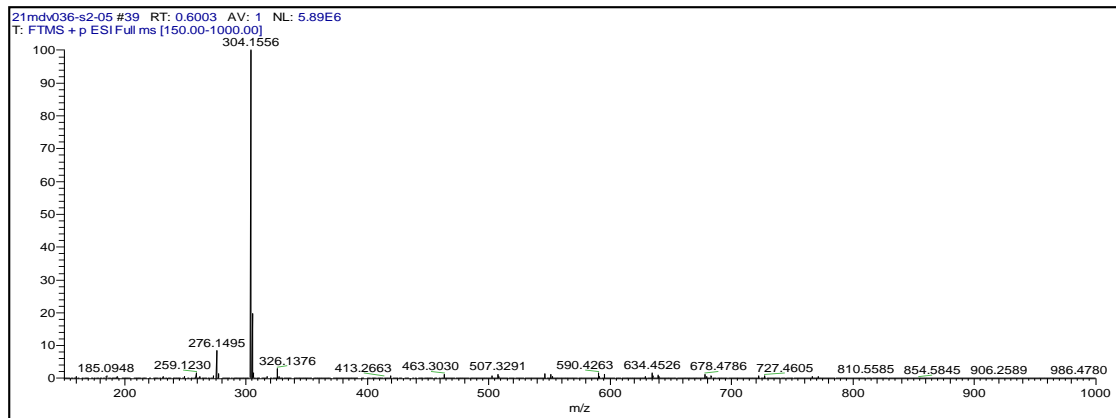

## 2-(1-benzyl-1H-tetrazol-5-yl)-1H-indole (2f)

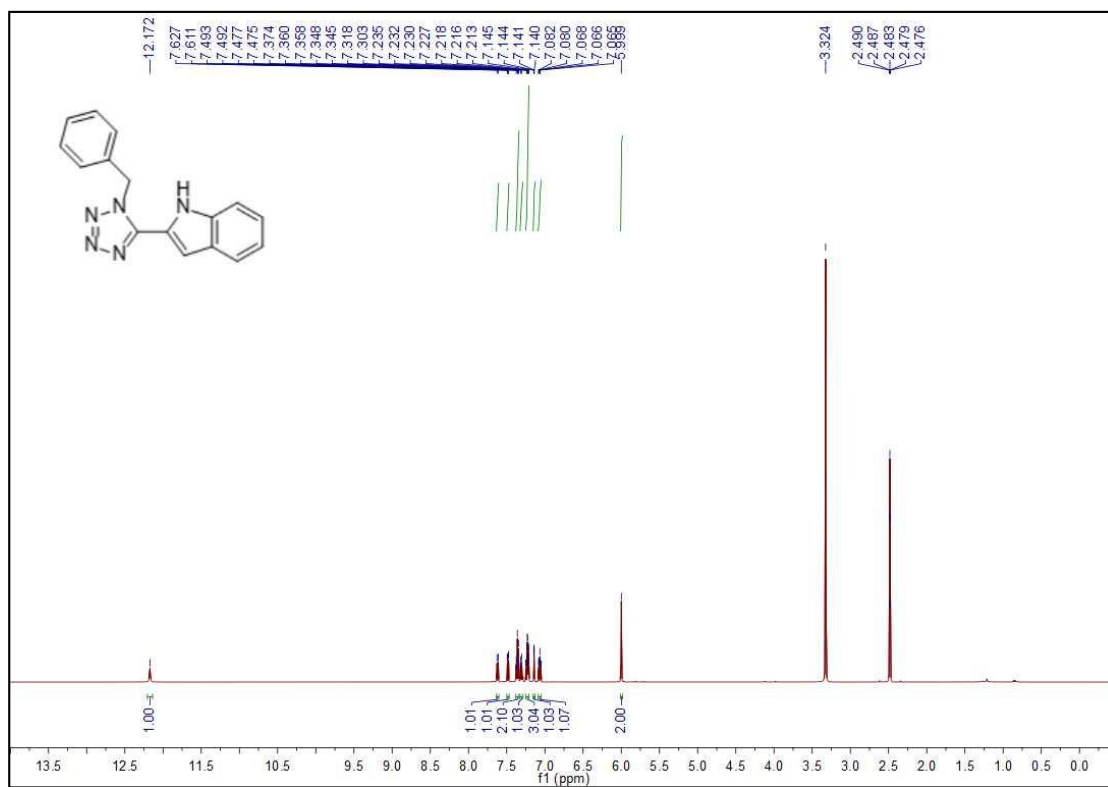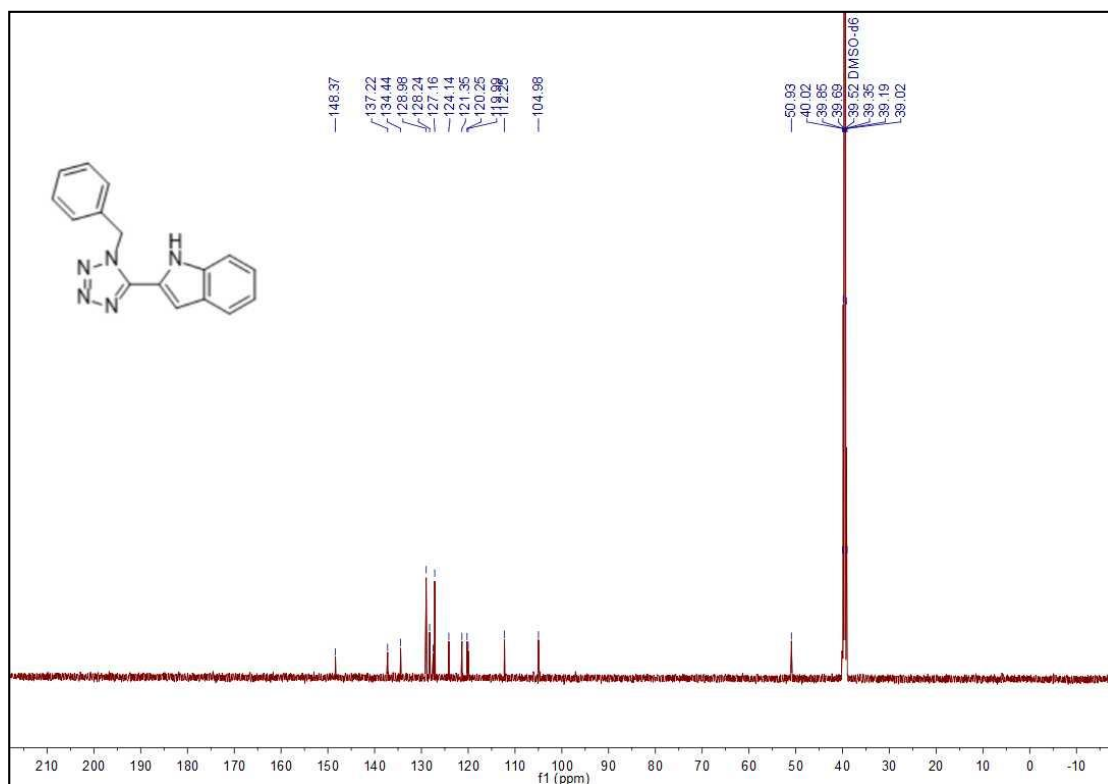

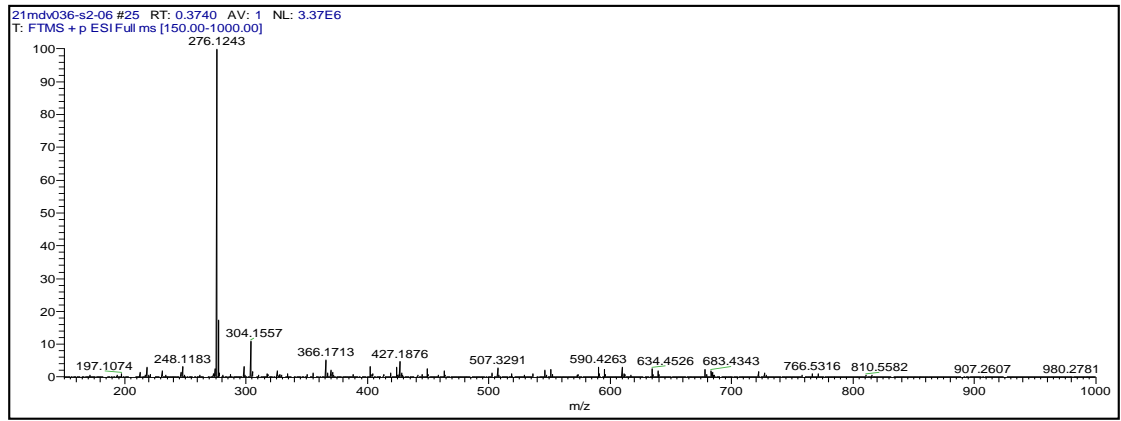

## 2-(1-benzyl-1H-tetrazol-5-yl)-5-isopropyl-1H-indole (2g)

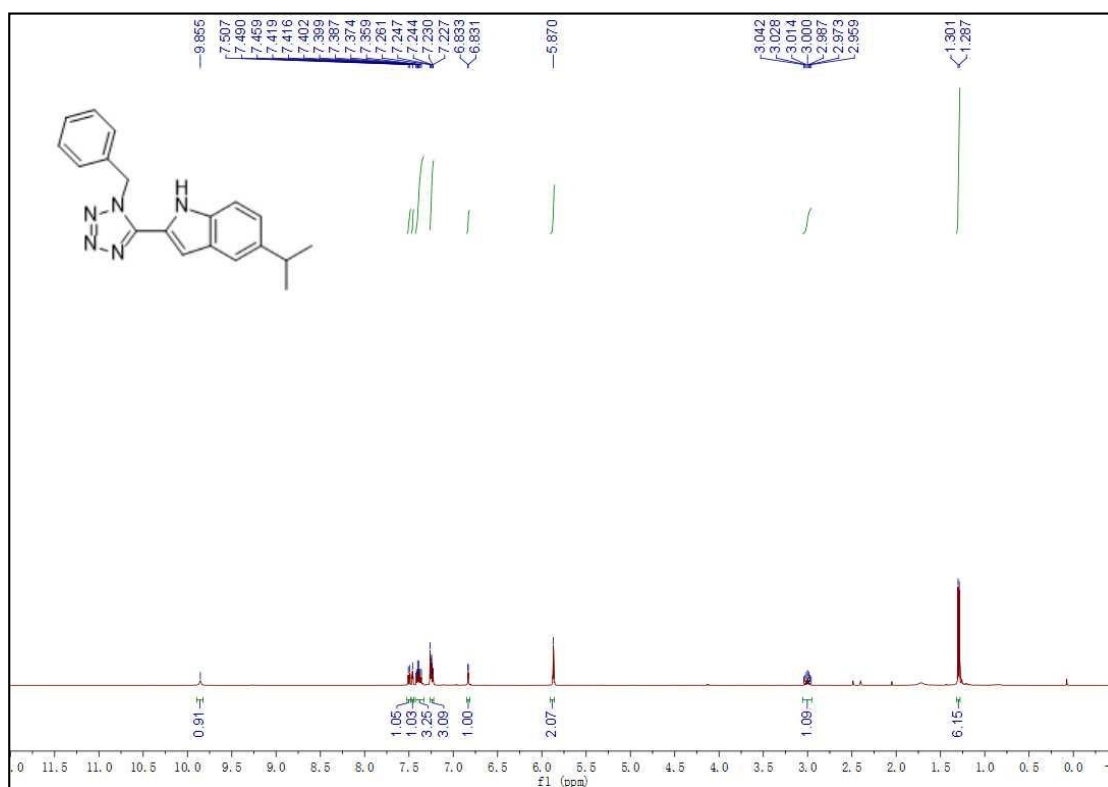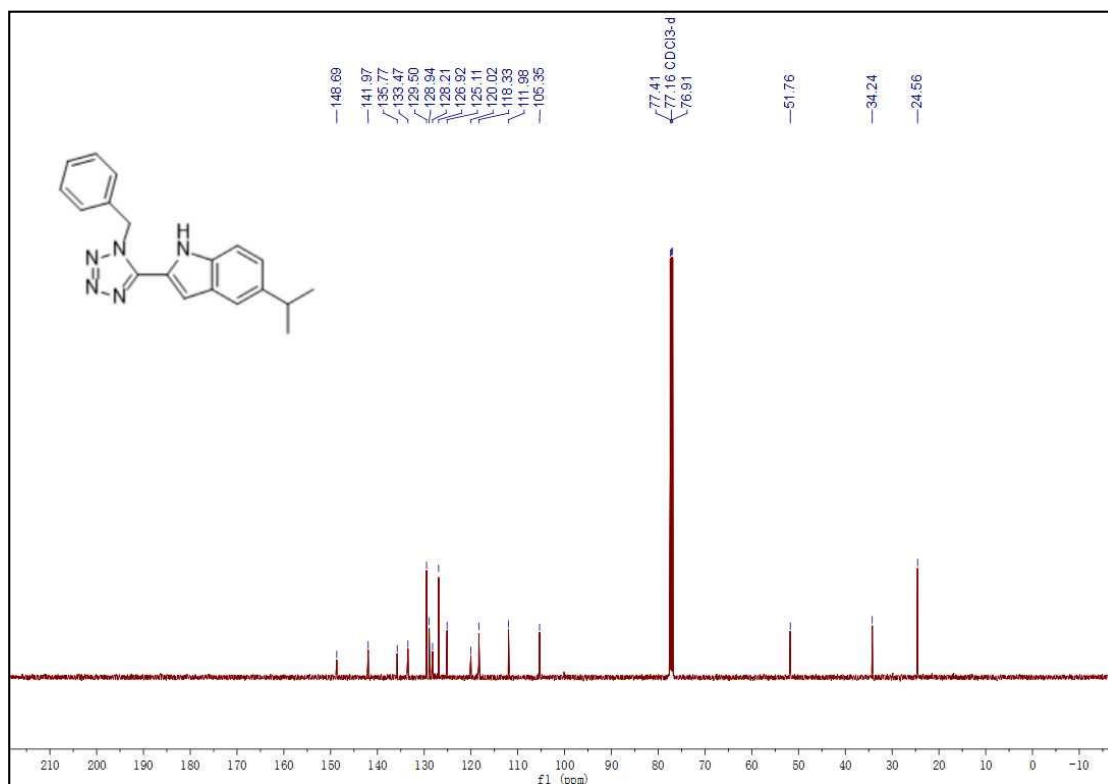

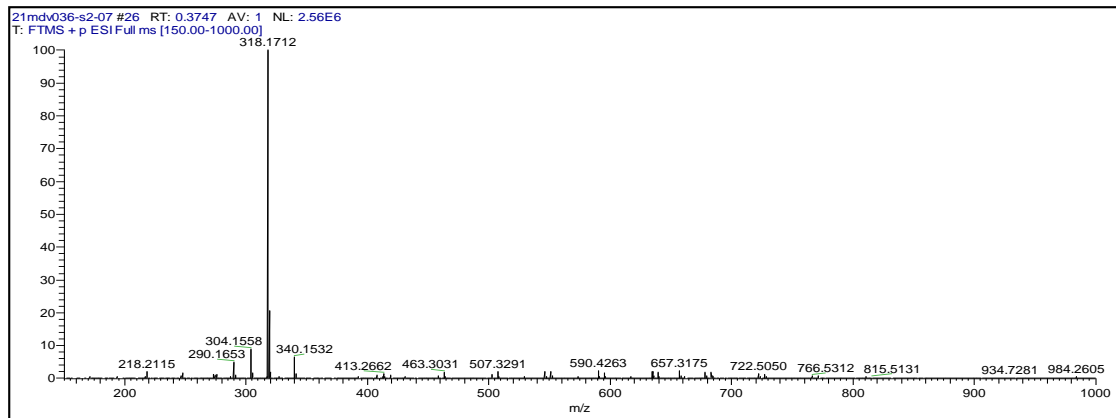

**2-(1-benzyl-1*H*-tetrazol-5-yl)-5,6-dimethoxy-1*H*-indole (2h-1) and 2-(1-benzyl-1*H*-tetrazol-5-yl)-4,5-dimethoxy-1*H*-indole (2h-2) (2h-2)**

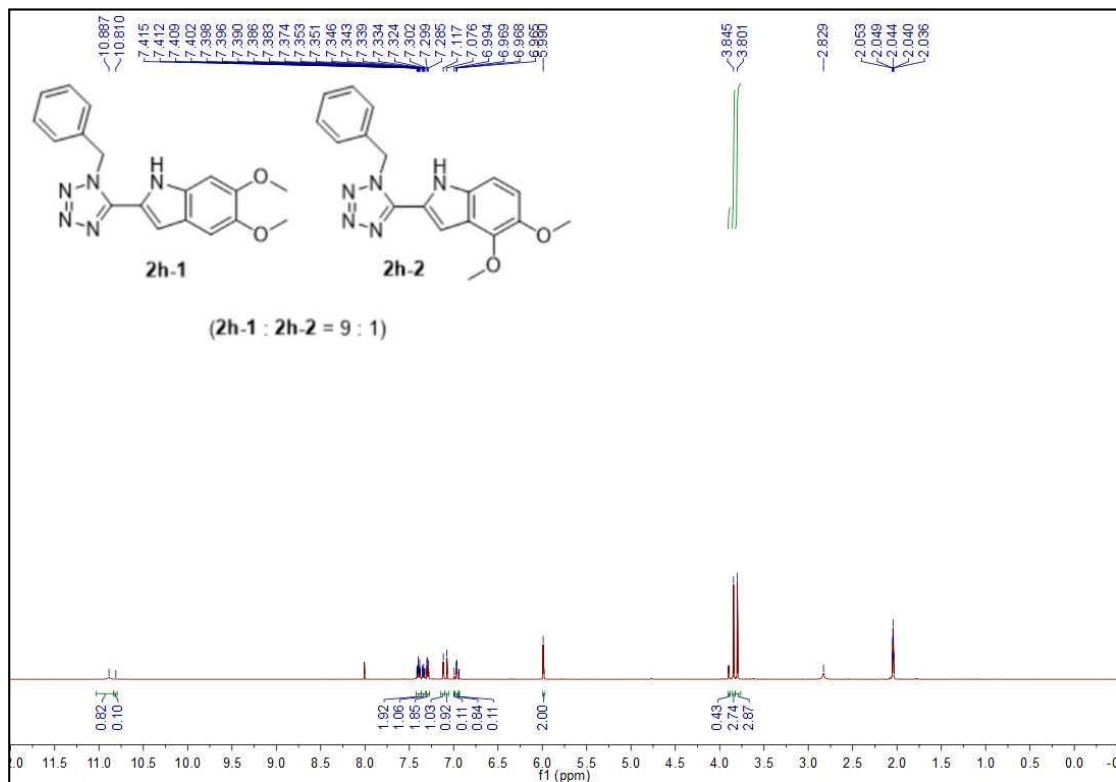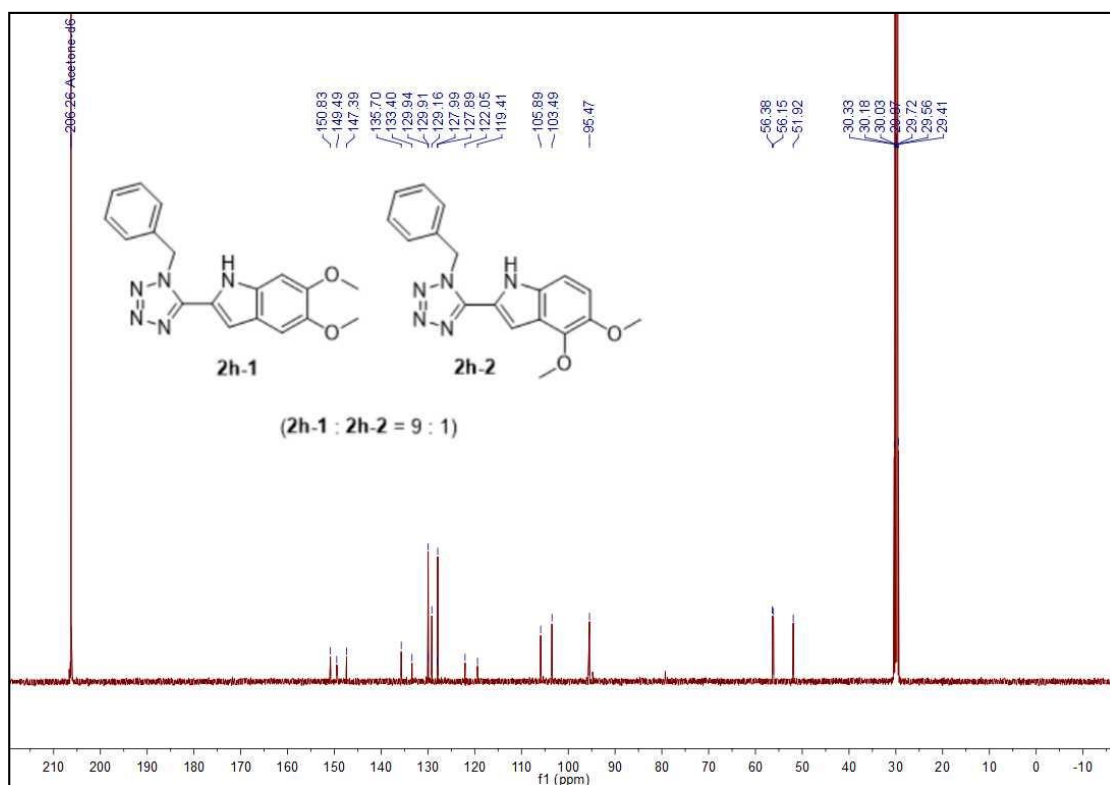

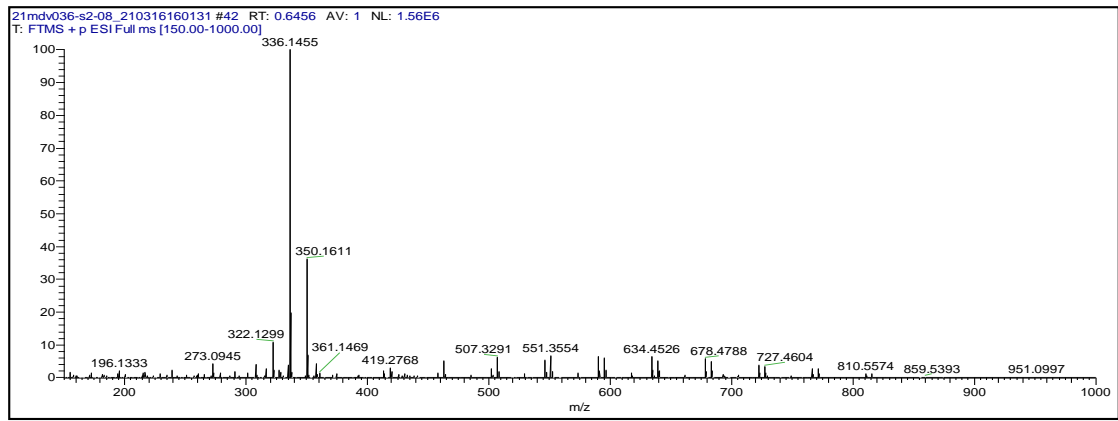

## 2-(1-benzyl-1*H*-tetrazol-5-yl)-5,7-dimethyl-1*H*-indole (2i)

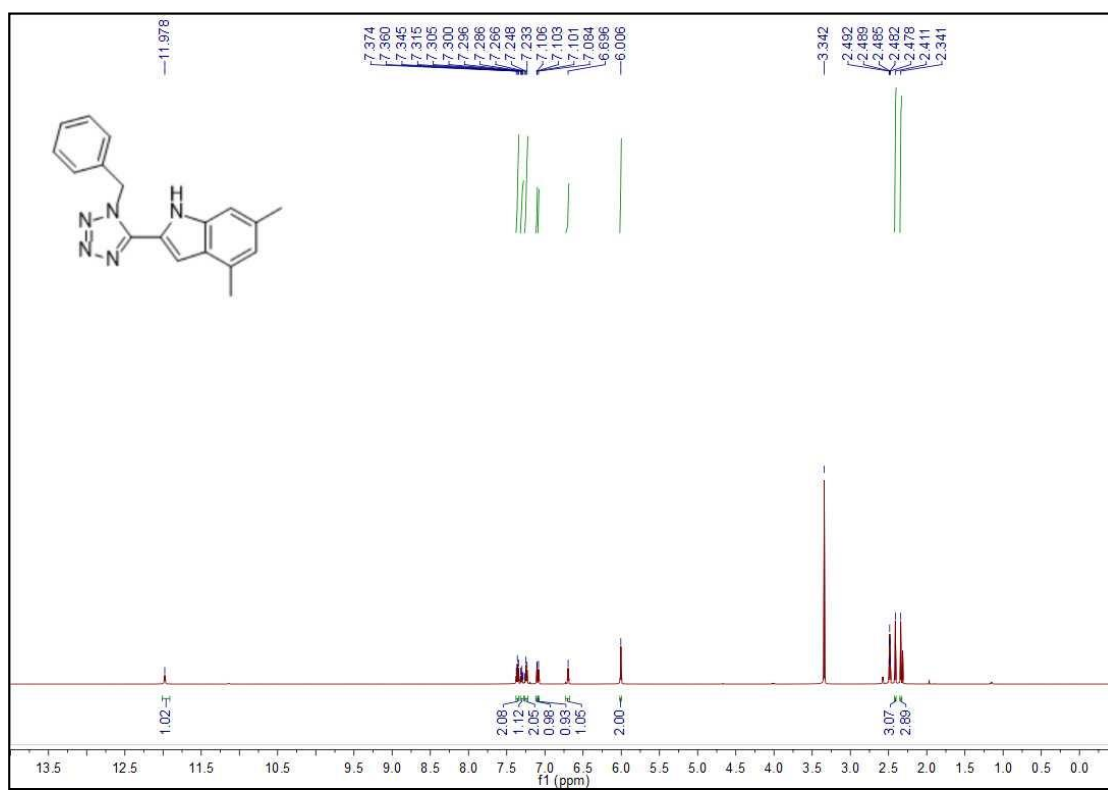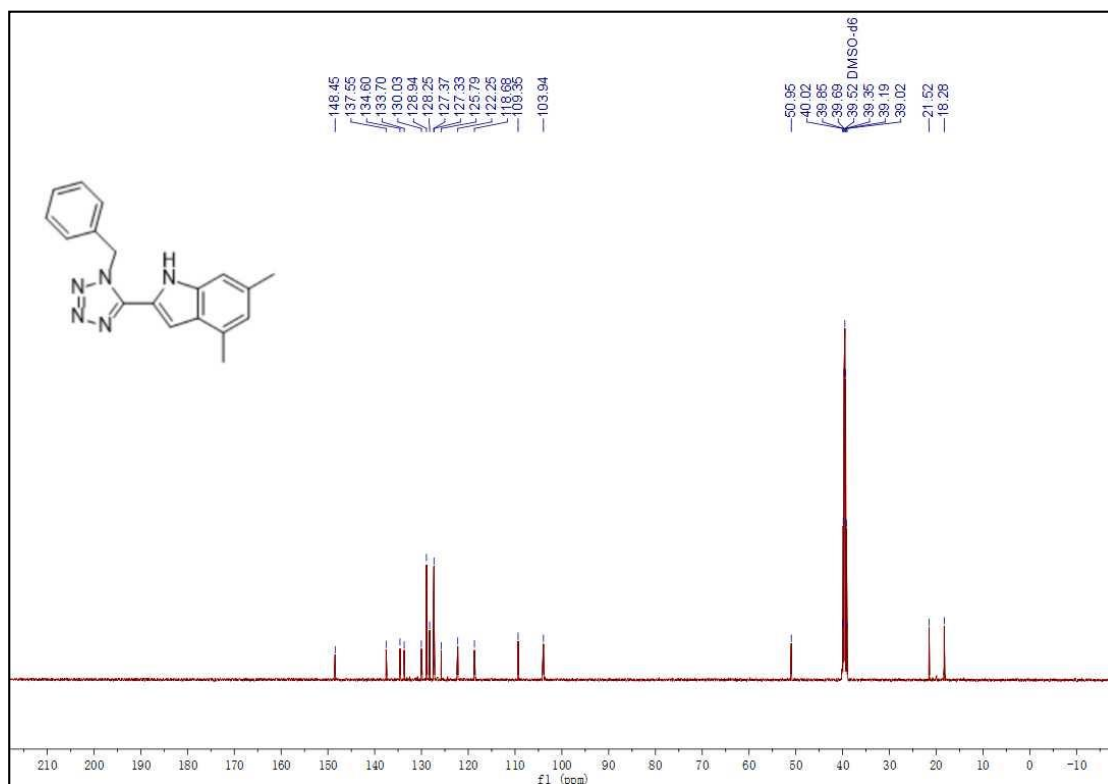



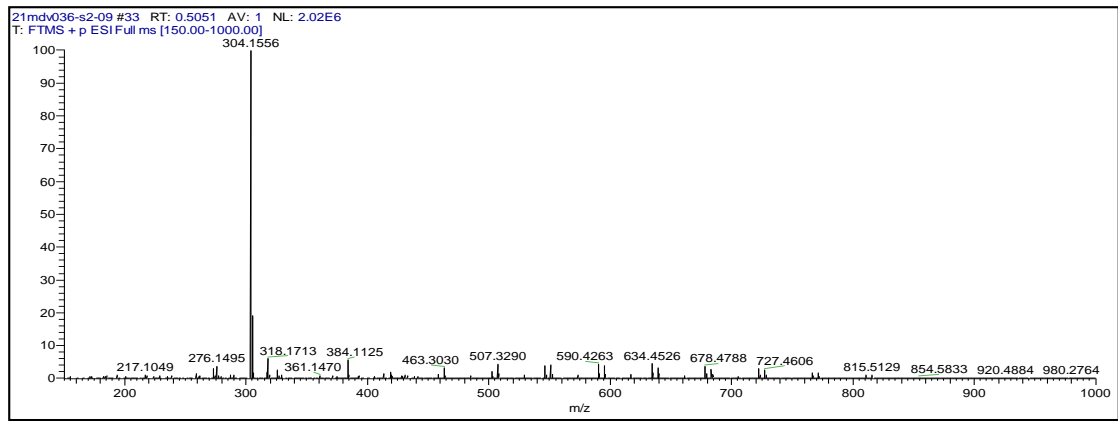

2-(1-benzyl-1H-tetrazol-5-yl)-6,7,8,9-tetrahydro-1H-benzo[g]indole (2j)

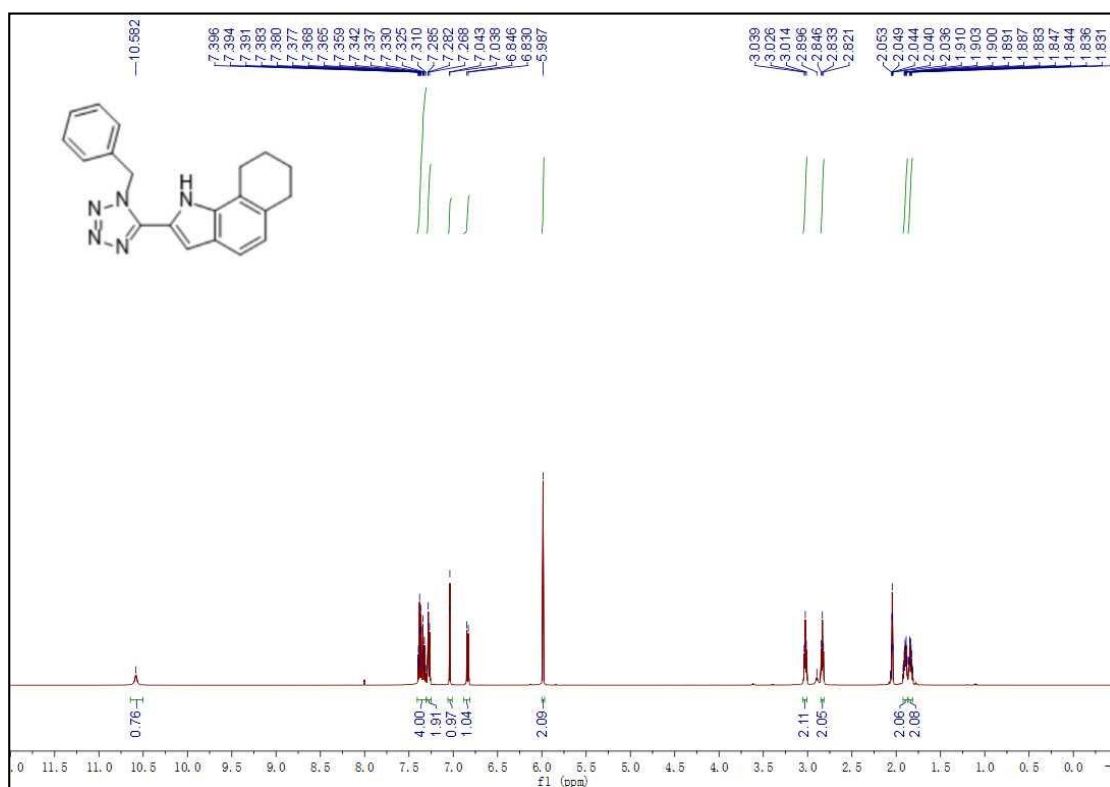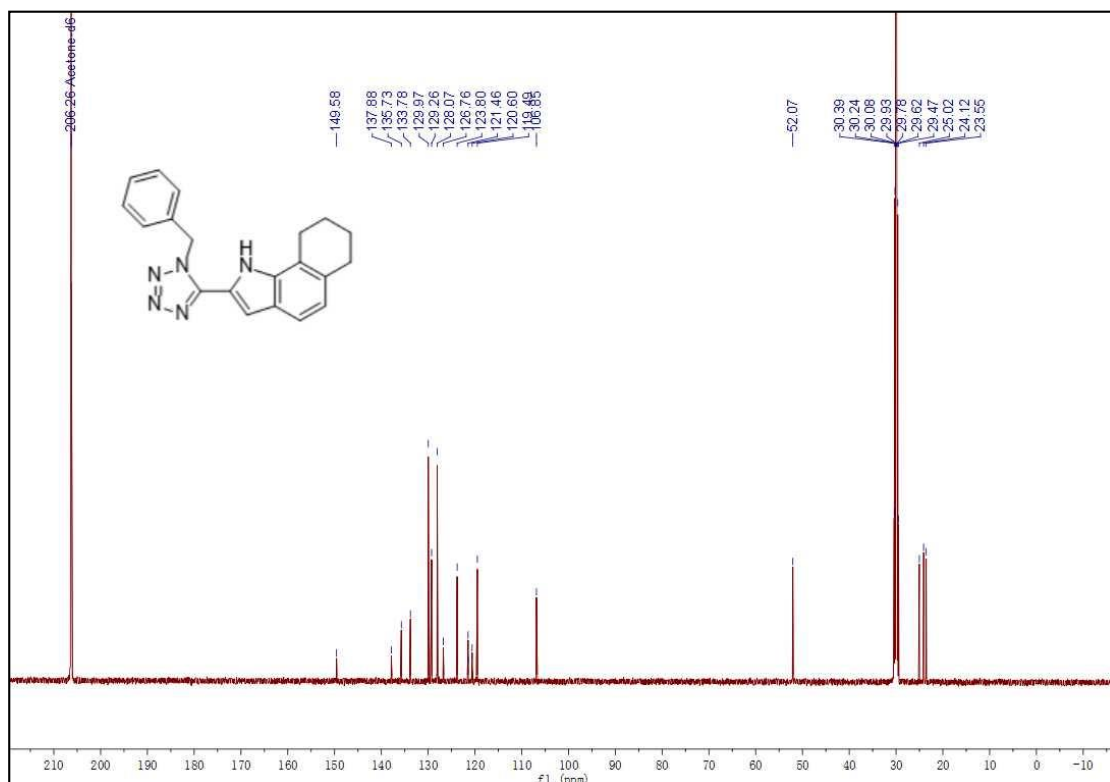

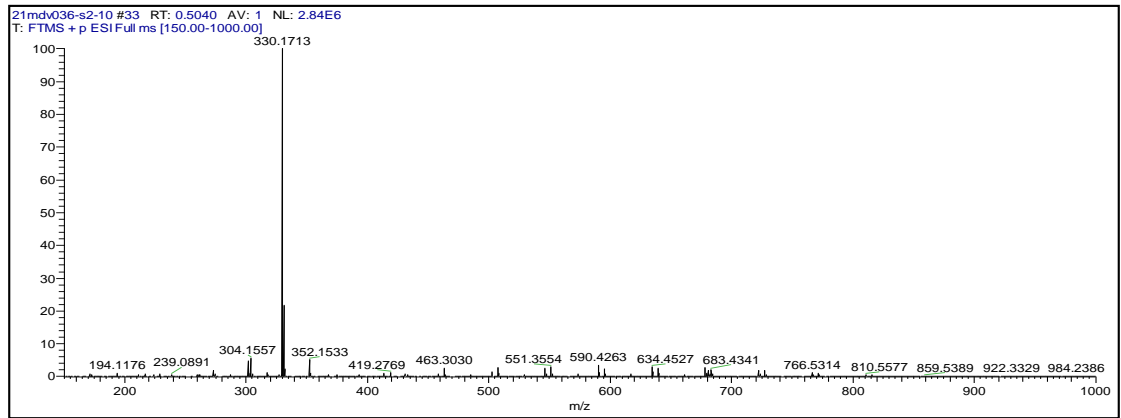

### 4,5,6-trimethoxy-2-(1-phenyl-1H-tetrazol-5-yl)-1H-indole (2k)

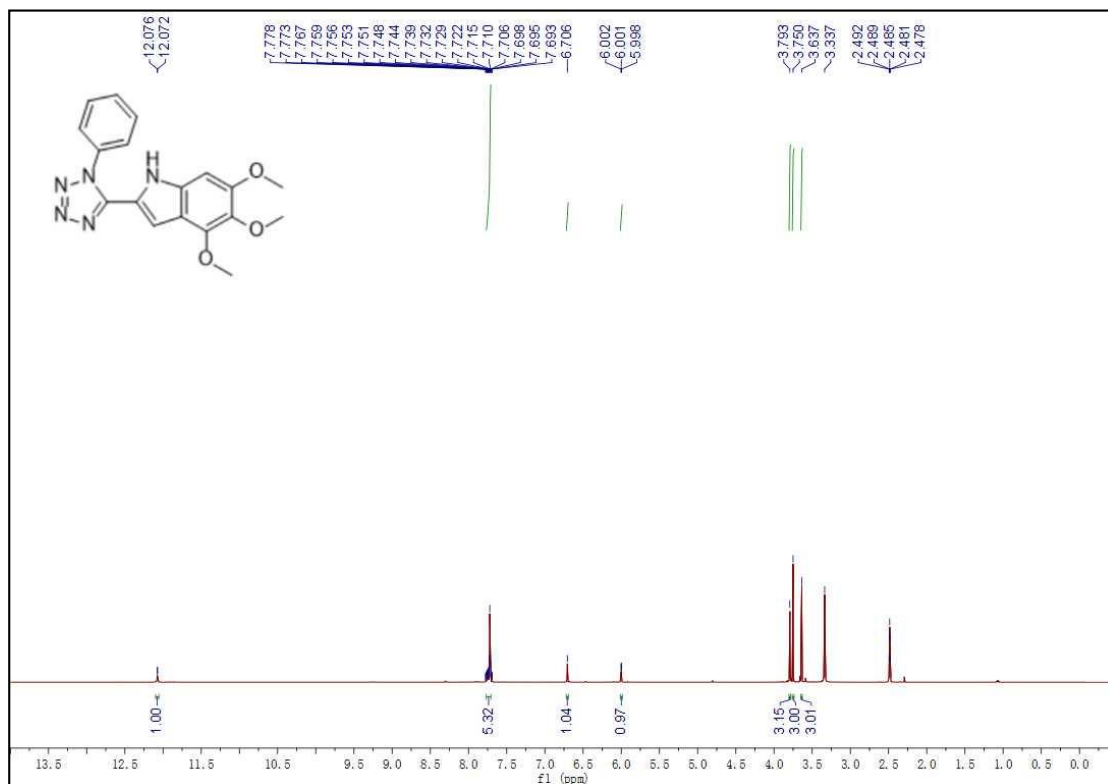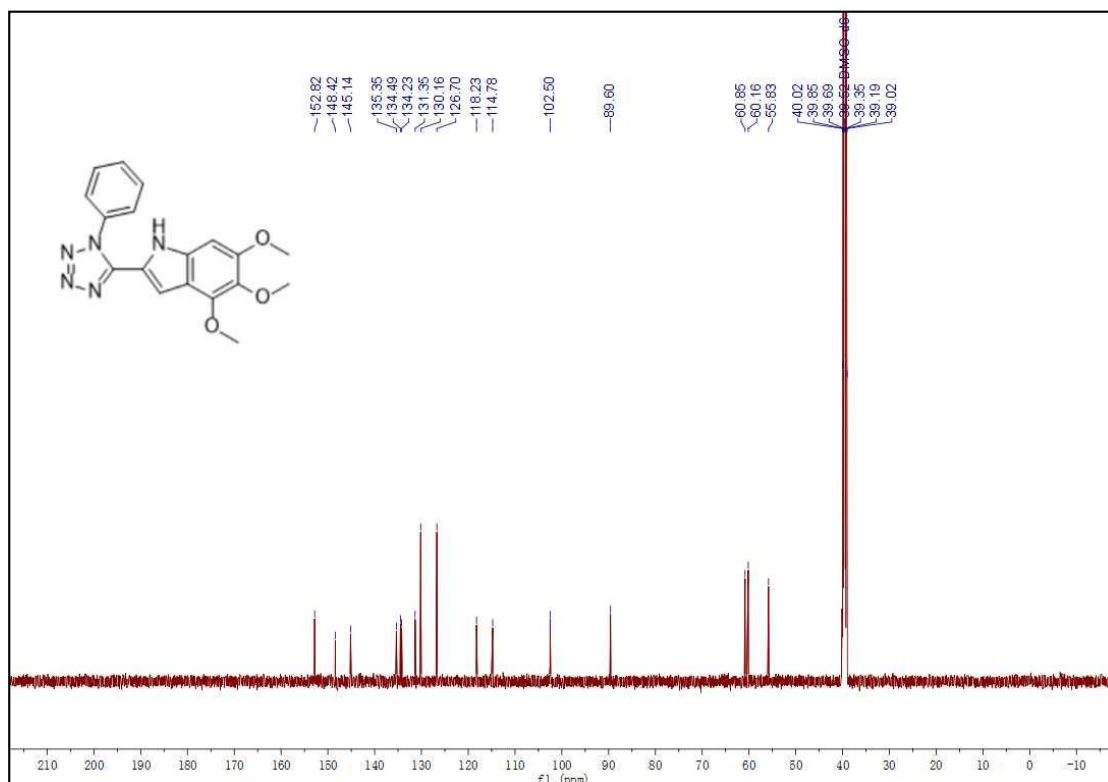

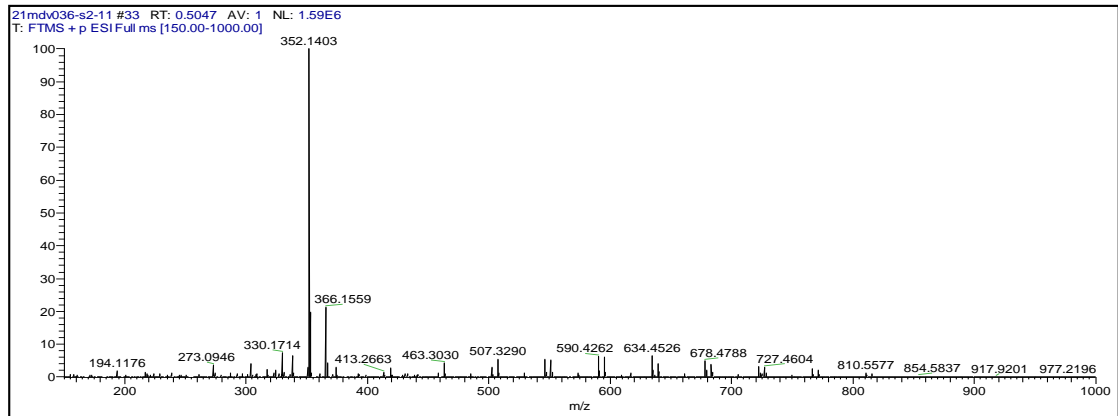

2-(1-(4-chlorophenyl)-1H-tetrazol-5-yl)-4,5,6-trimethoxy-1H-indole (2I)

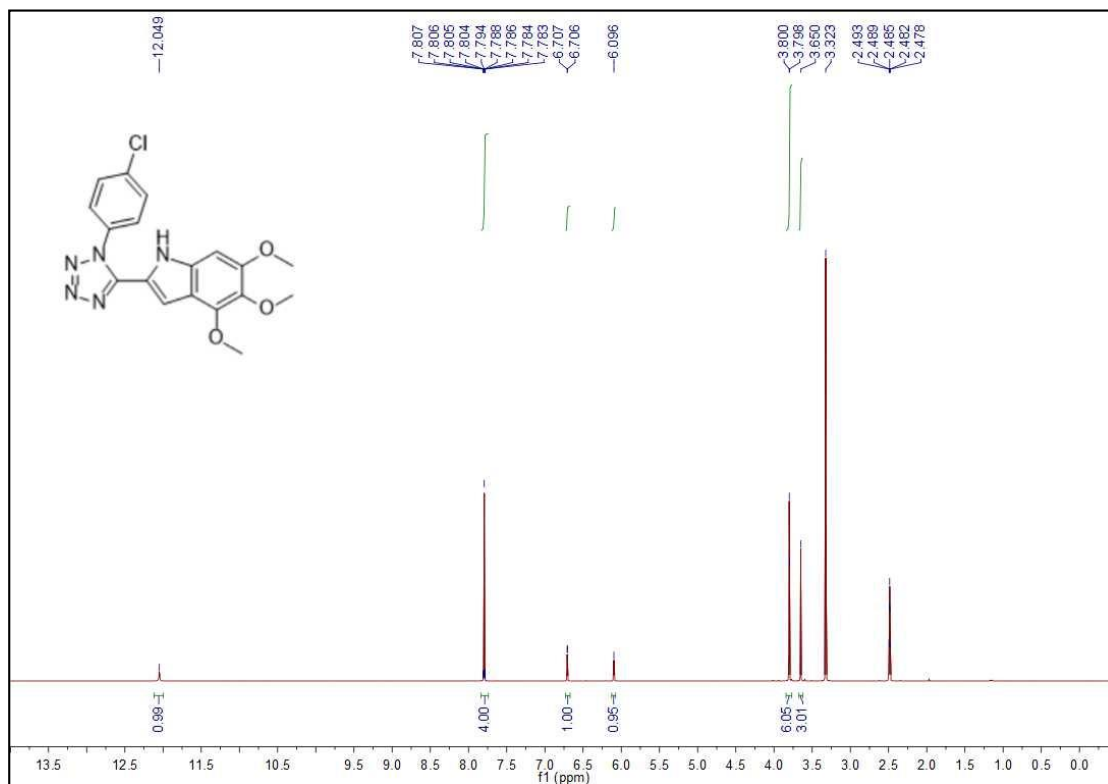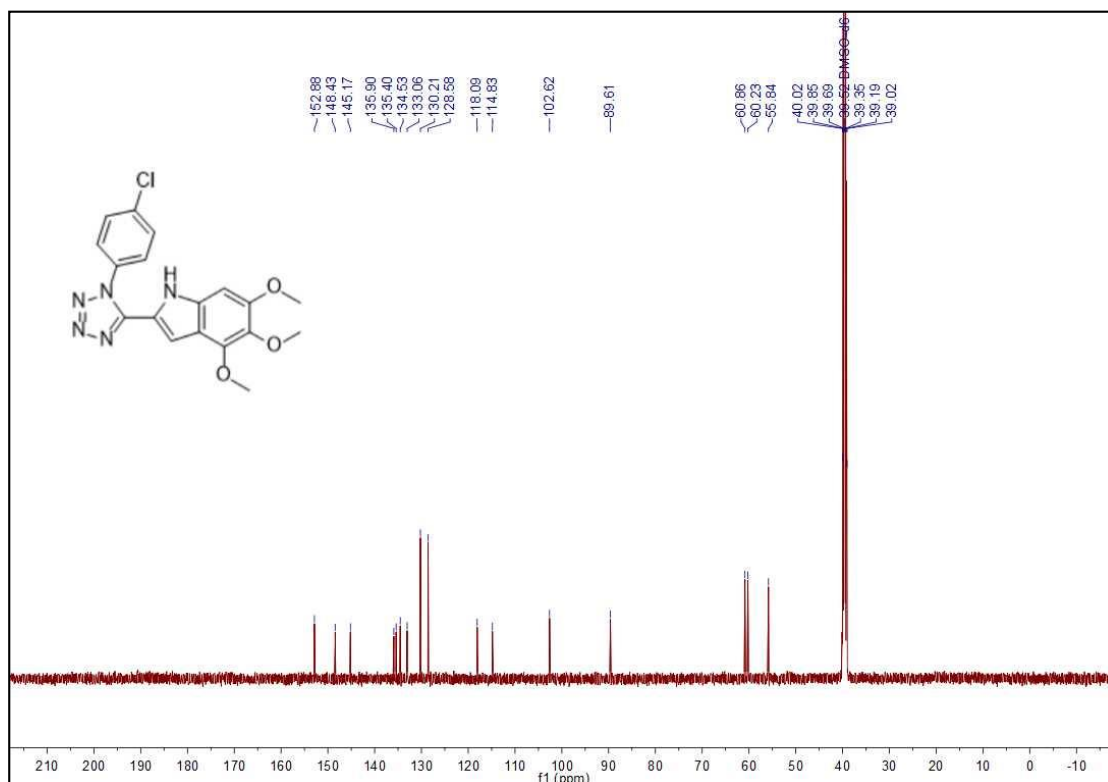

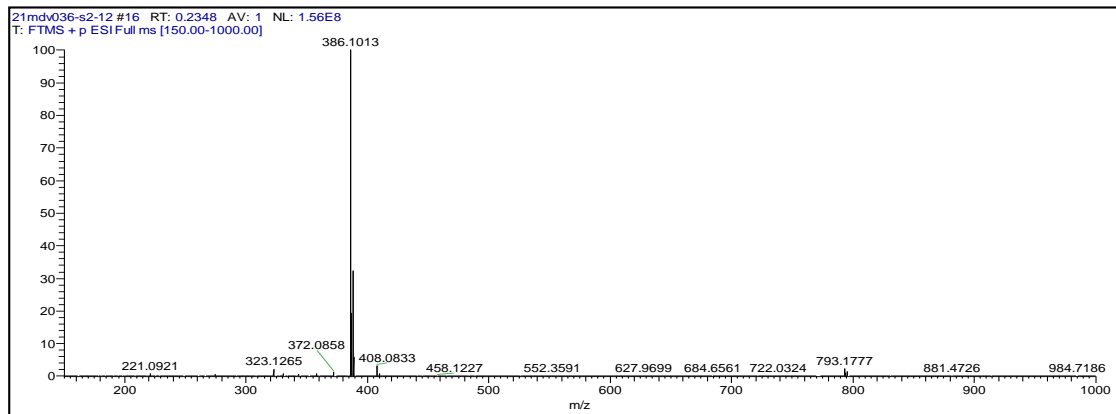

2-(1-cyclohexyl-1H-tetrazol-5-yl)-4,5,6-trimethoxy-1H-indole (2m)

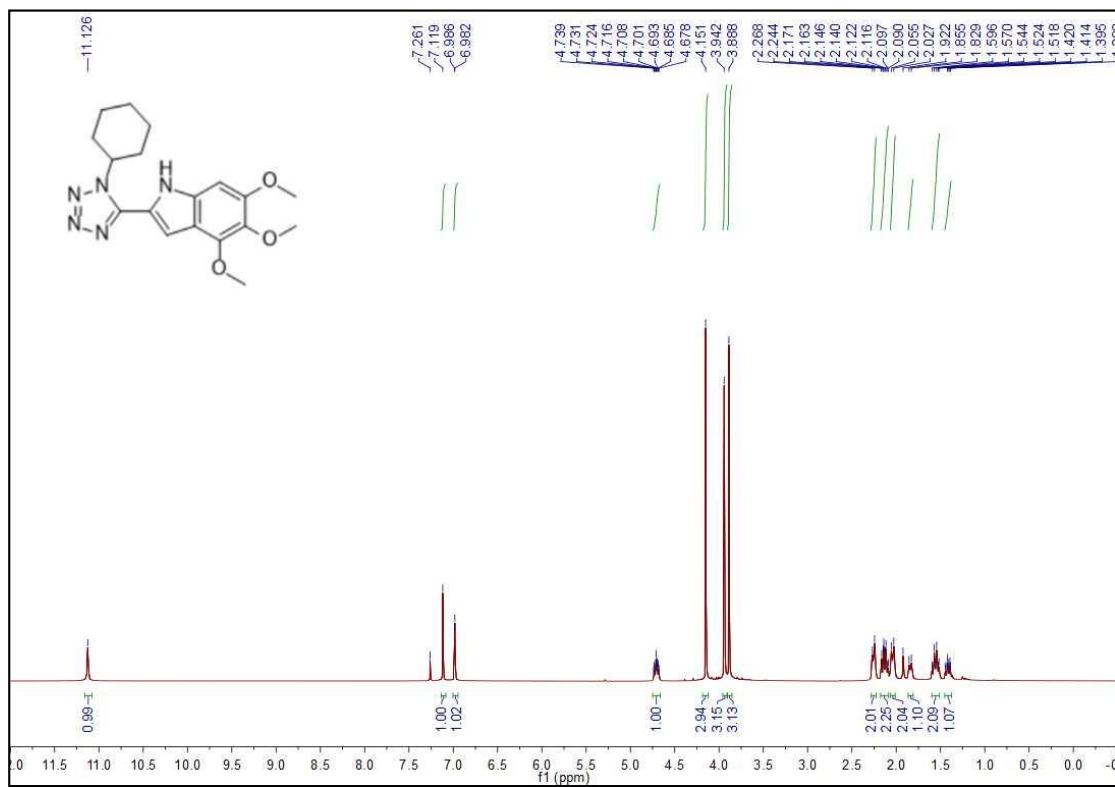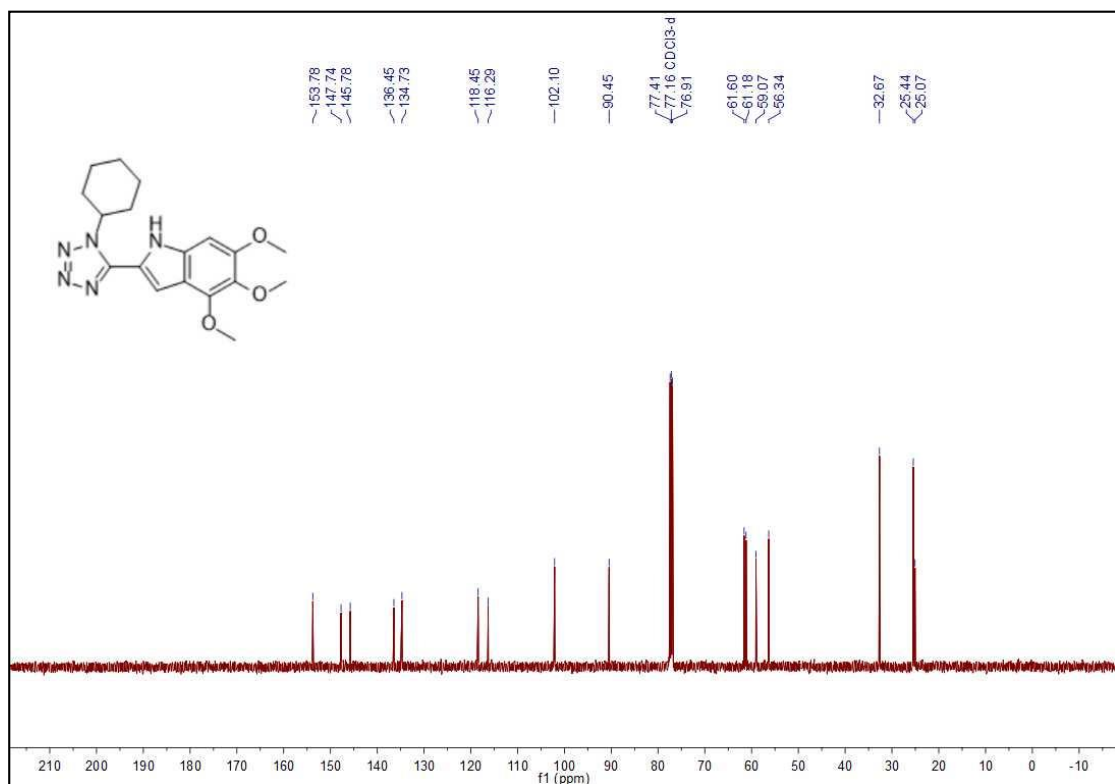



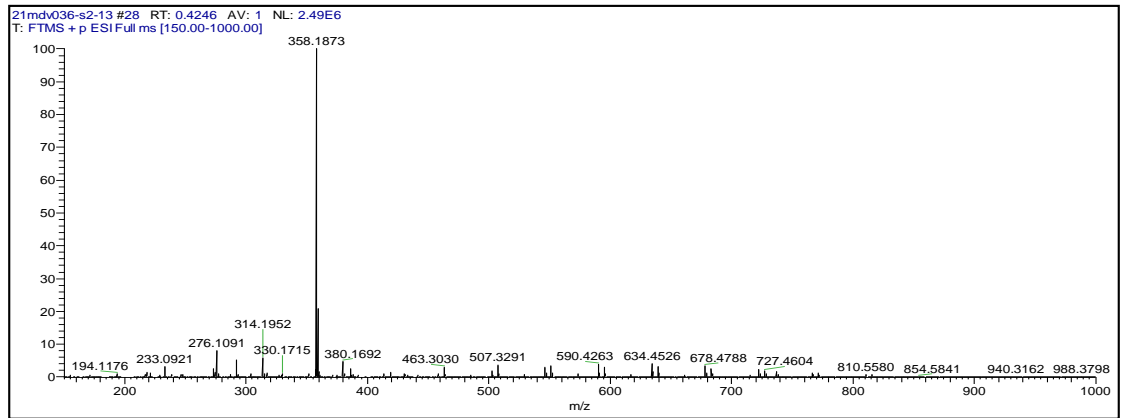

4,5,6-trimethoxy-2-(1-(2-(trifluoromethyl)phenyl)-1H-tetrazol-5-yl)-1H-indole (2n)

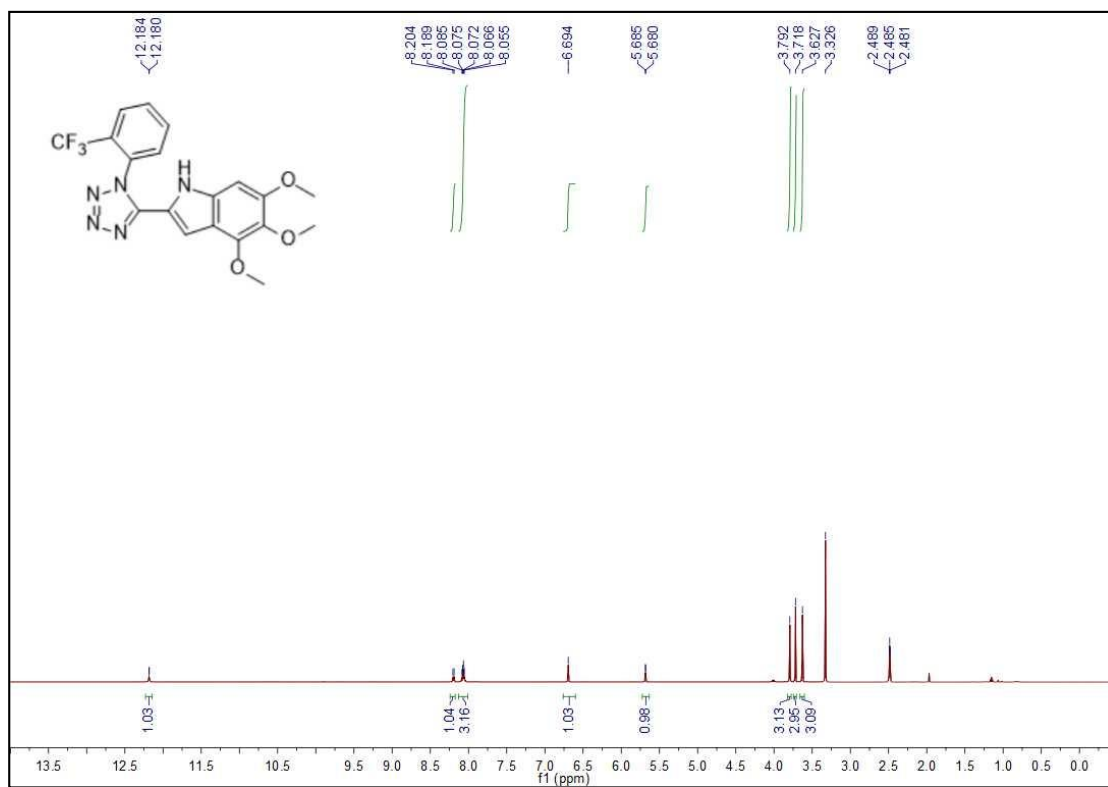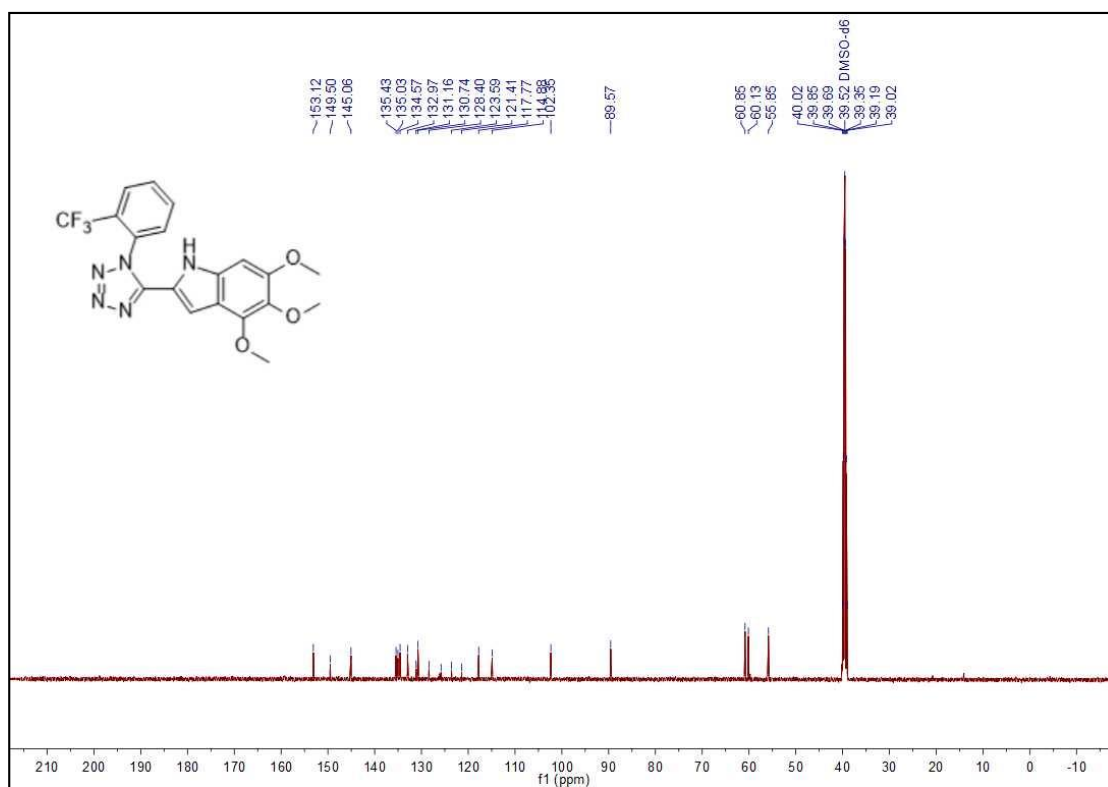

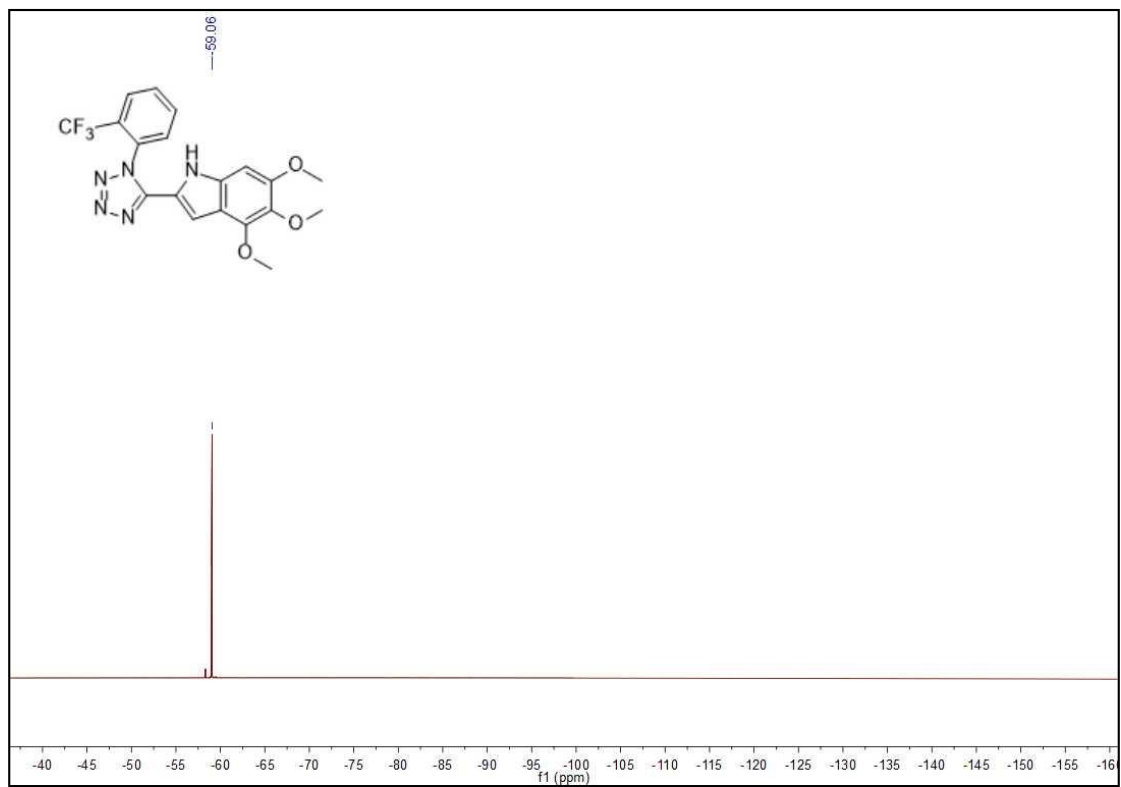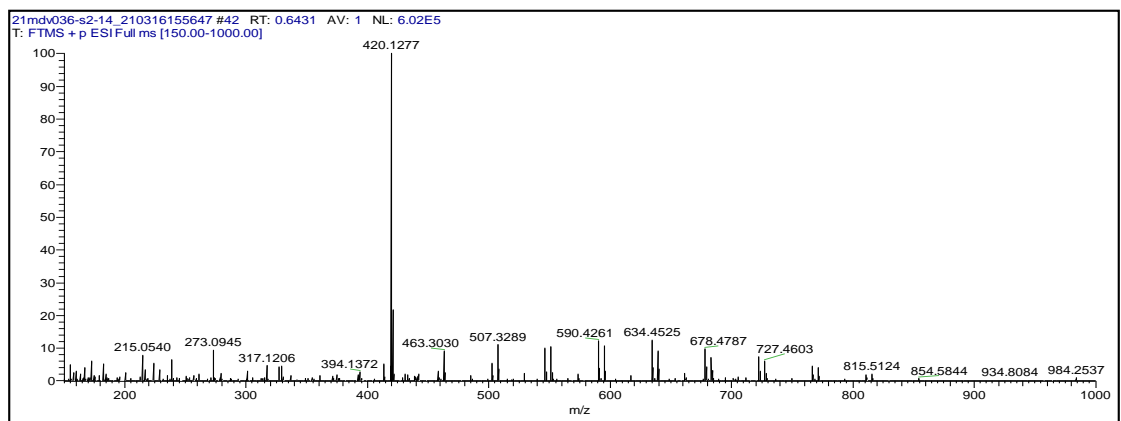

### 4,5,6-trimethoxy-2-(1-(*o*-tolyl)-1*H*-tetrazol-5-yl)-1*H*-indole (2o)

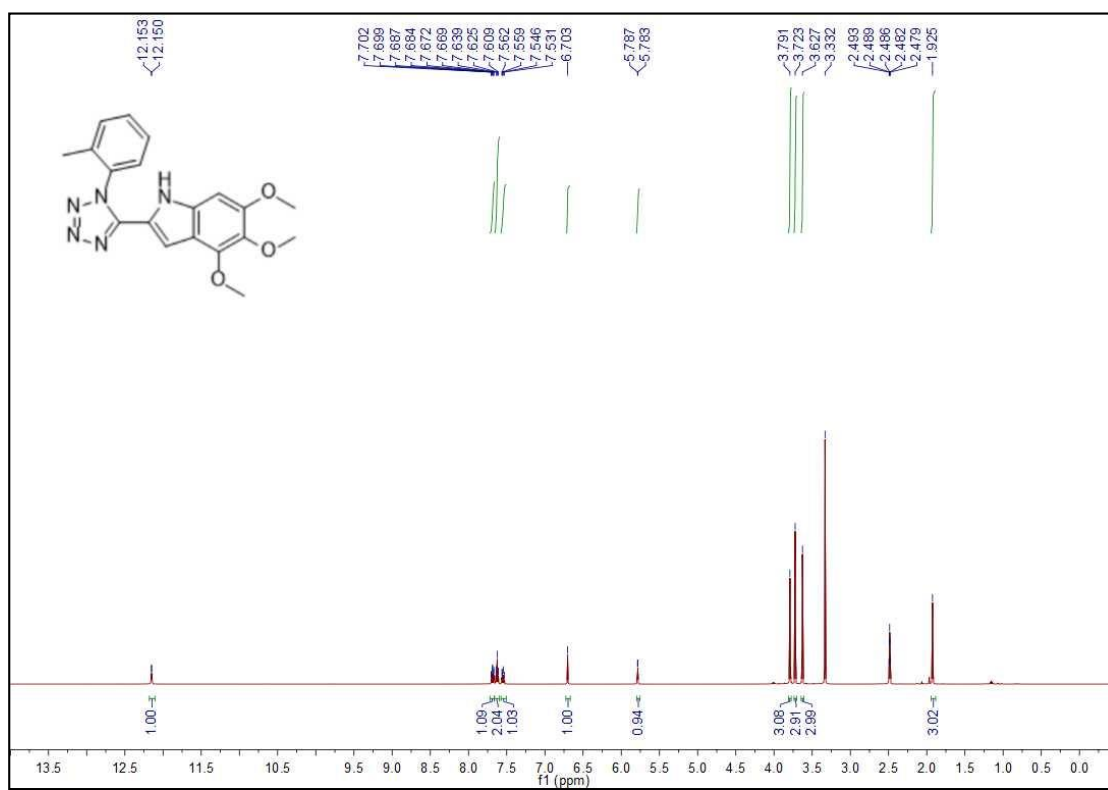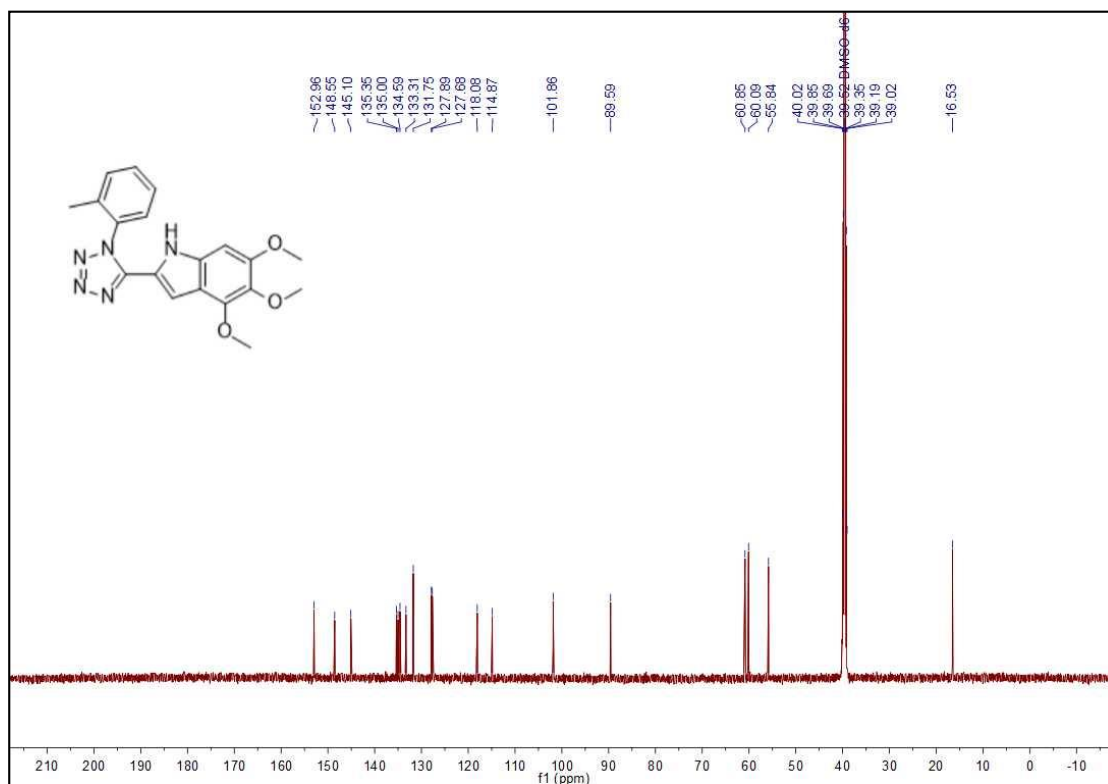

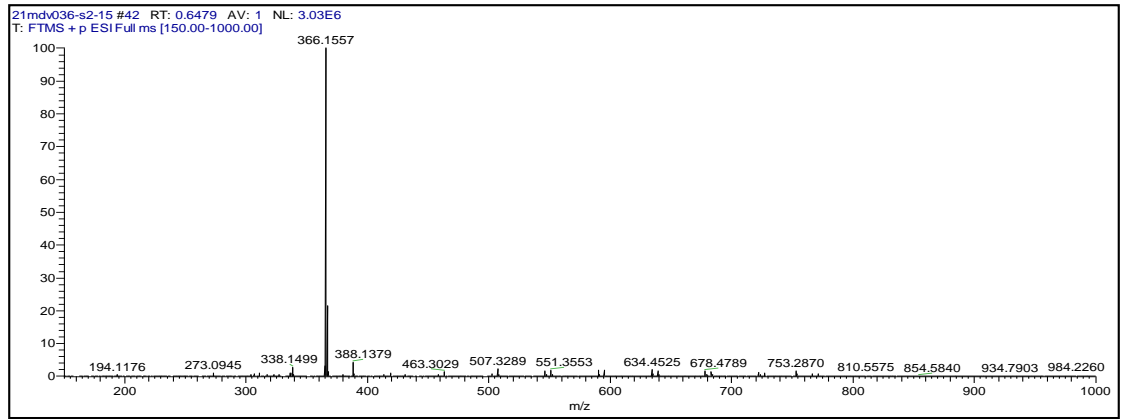

2-(1-(4-chlorophenyl)-1H-tetrazol-5-yl)-5,7-dimethyl-1H-indole (2p)

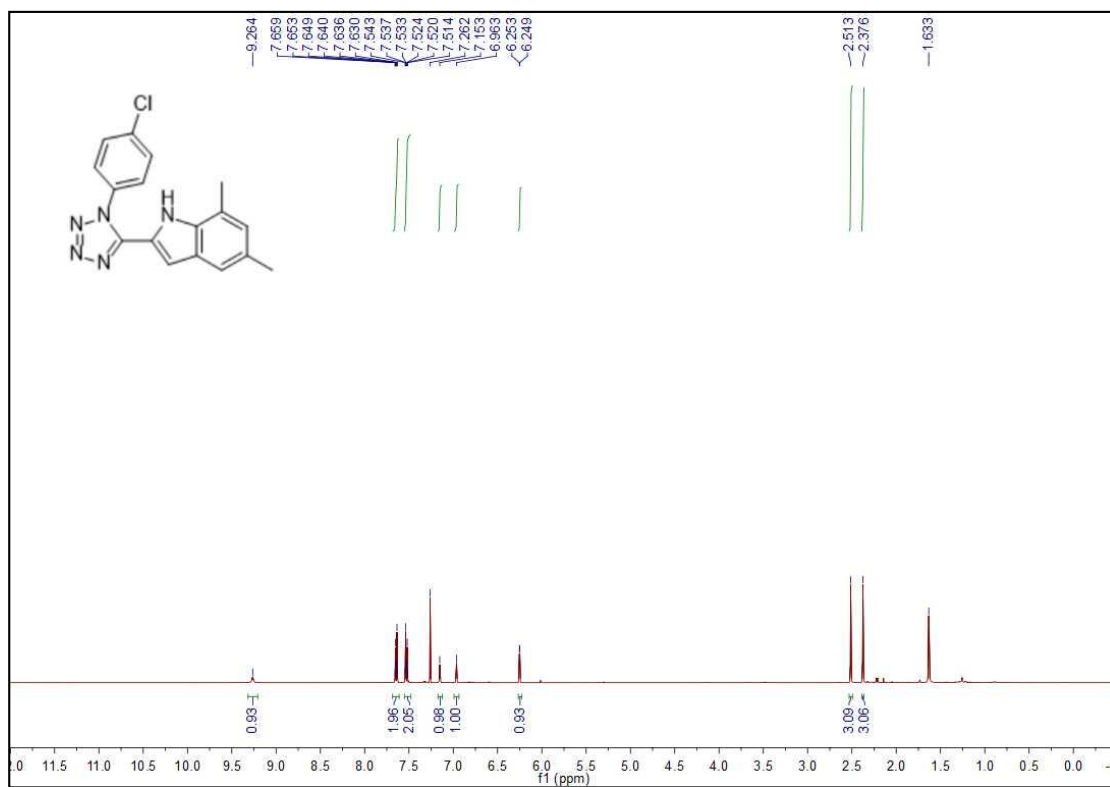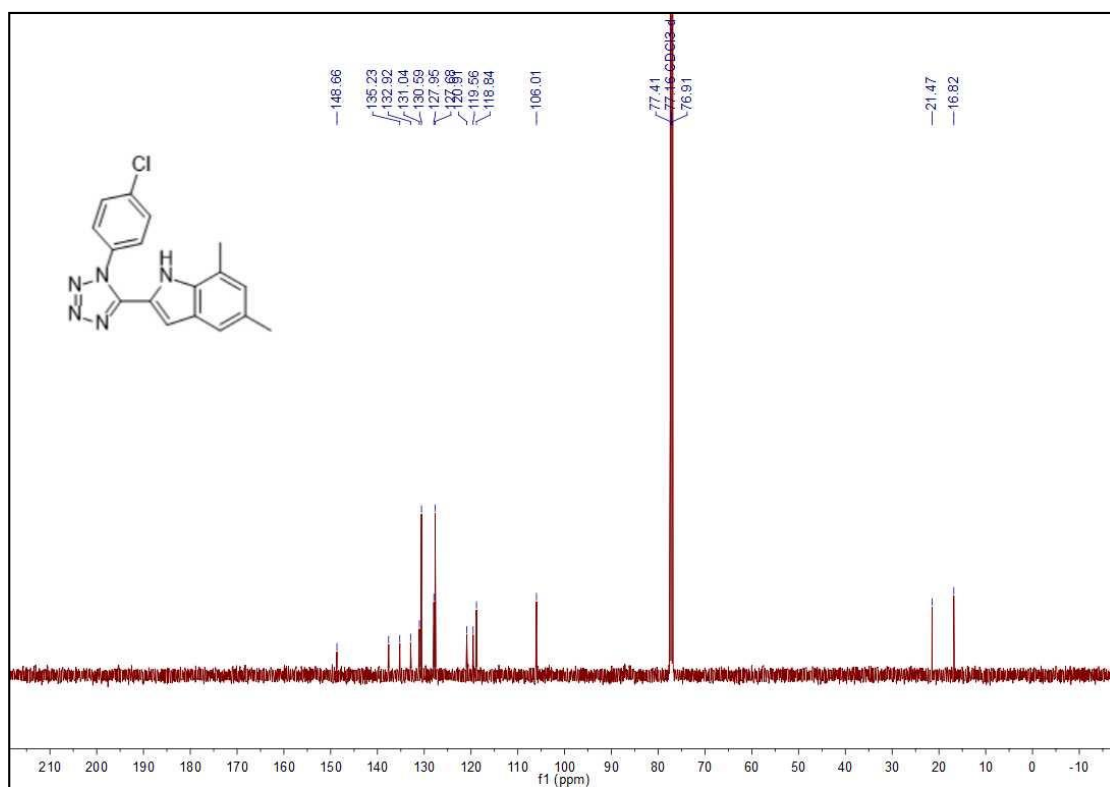

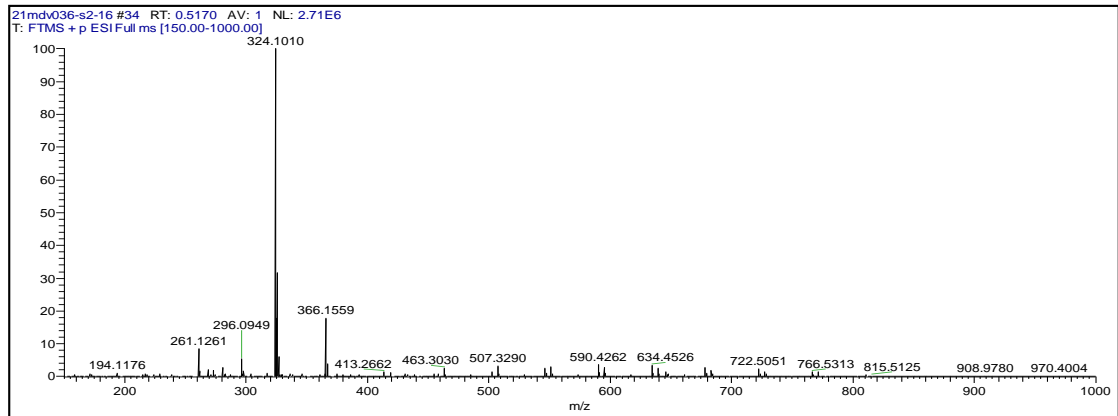

2-(1-cyclohexyl-1H-tetrazol-5-yl)-5,7-dimethyl-1H-indole (2q)

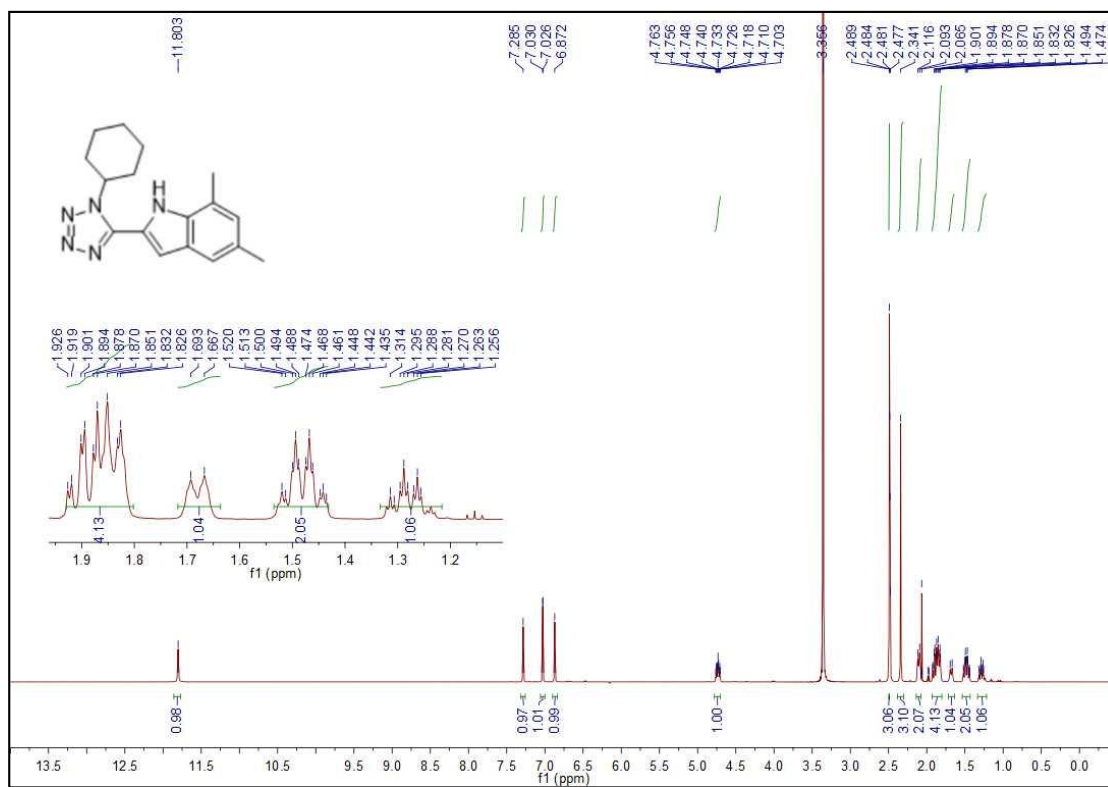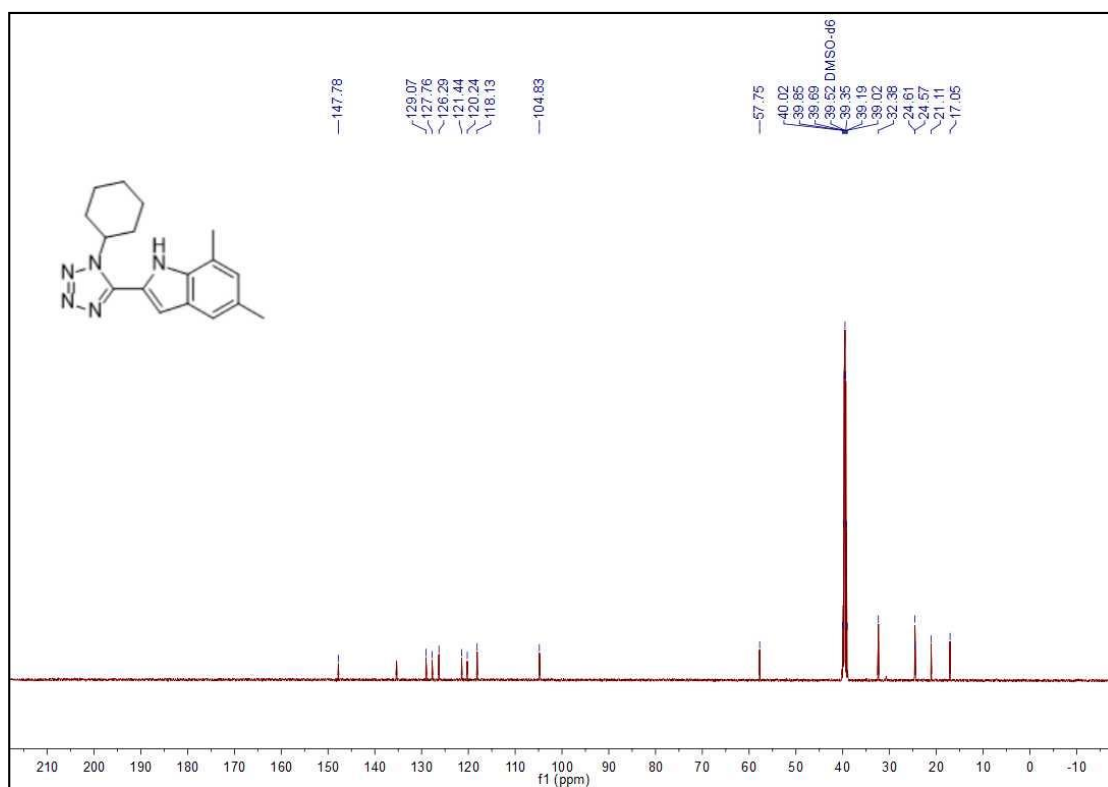



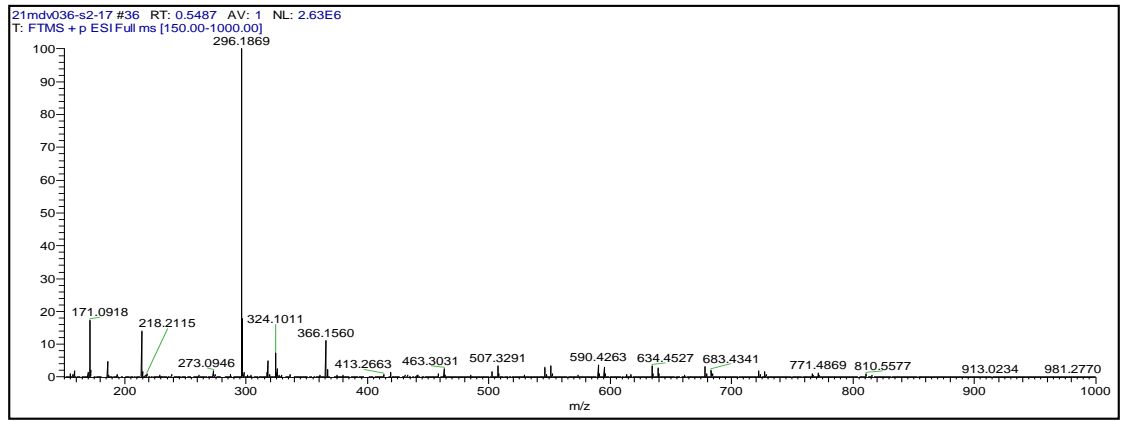

## 2-(1-(4-chlorophenyl)-1H-tetrazol-5-yl)-1H-indole (2r)

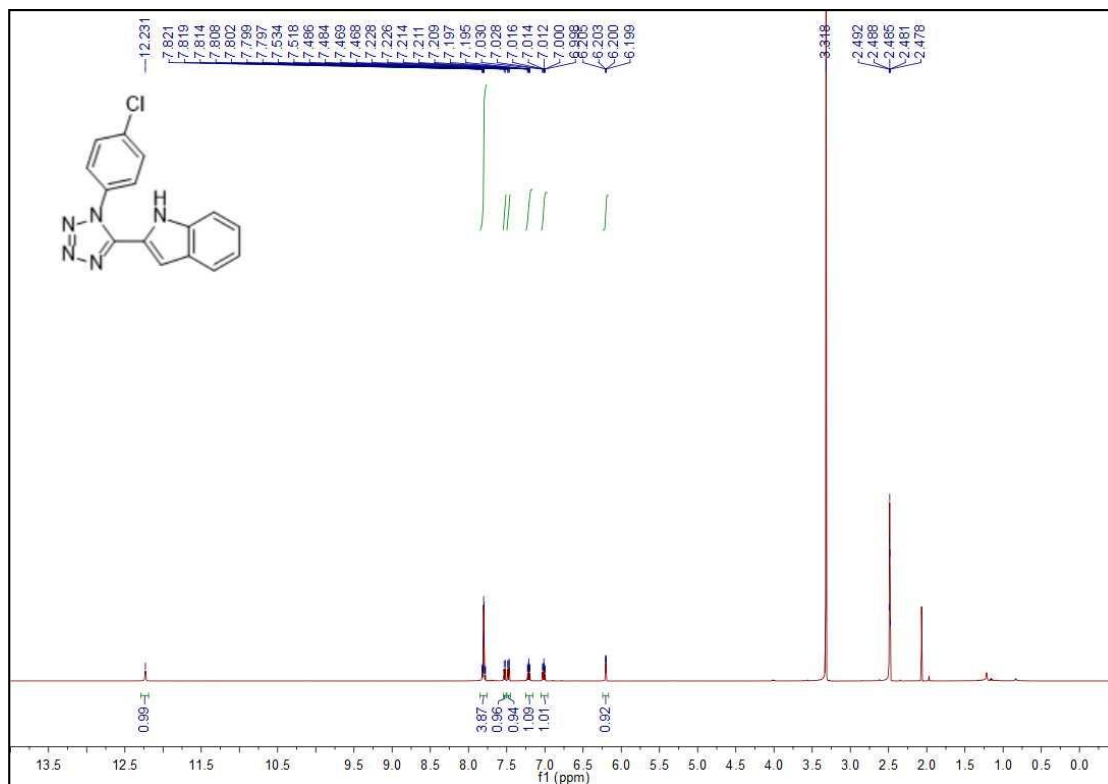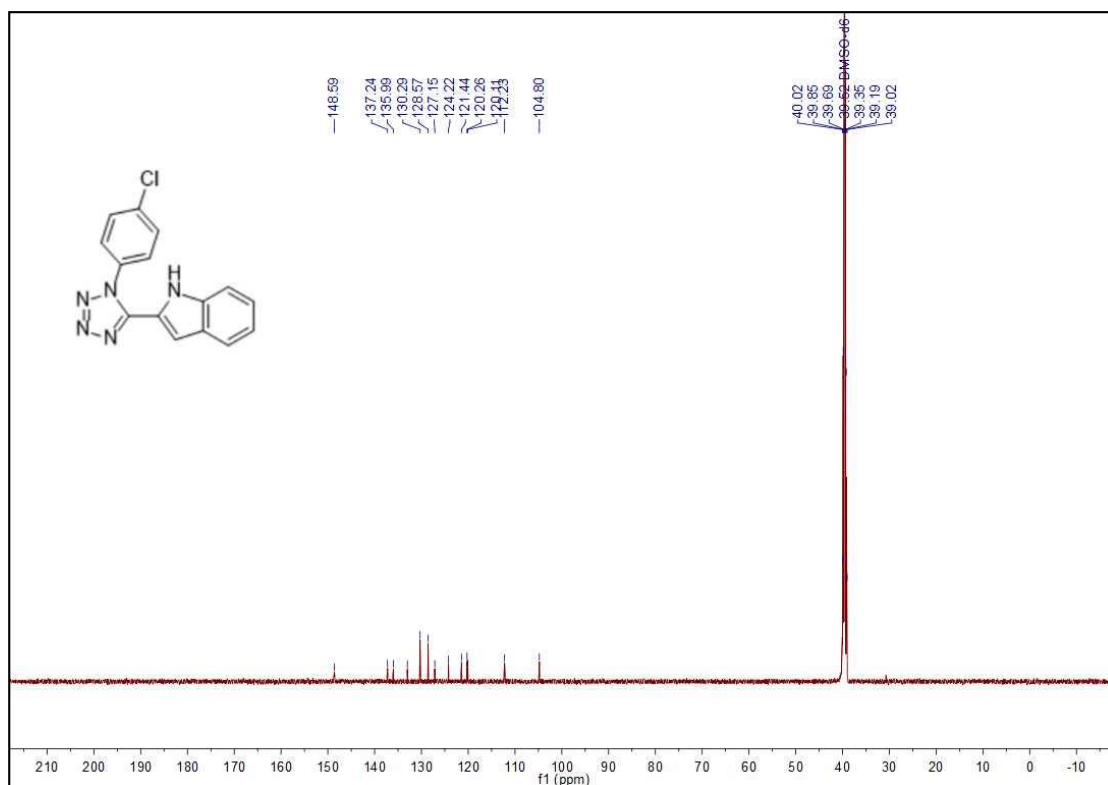

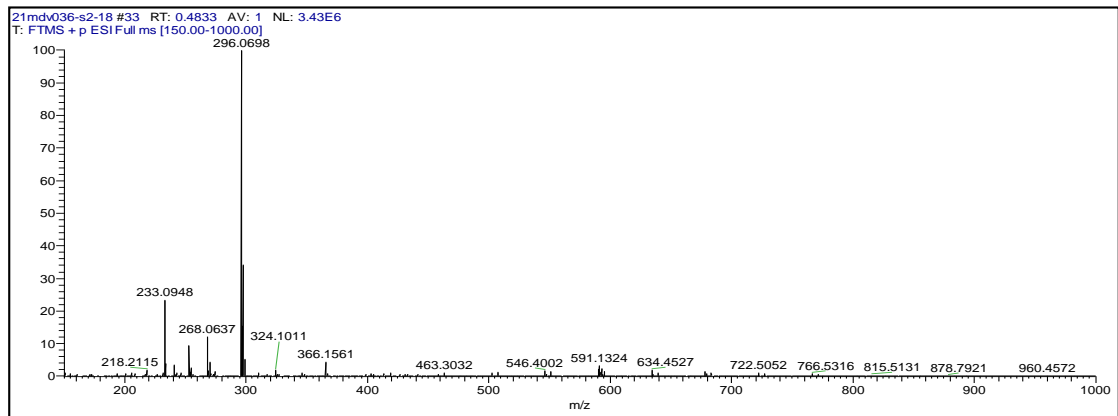

## 2-(1-cyclohexyl-1H-tetrazol-5-yl)-1H-indole (2s)

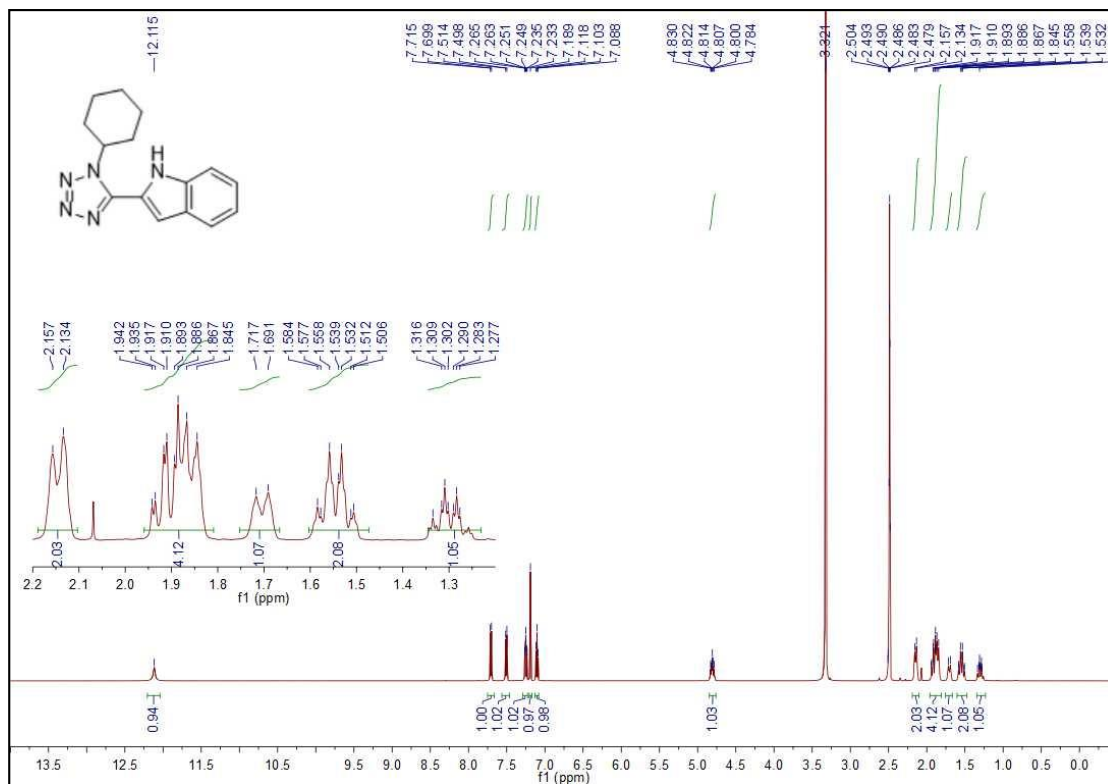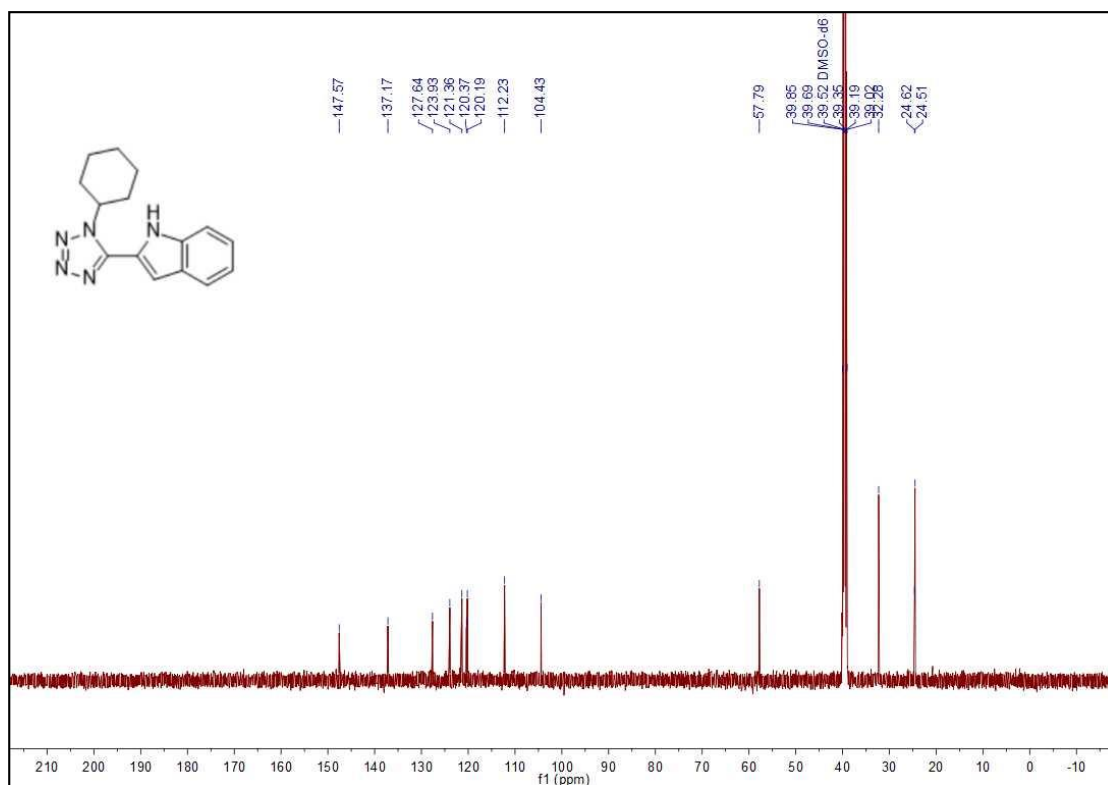

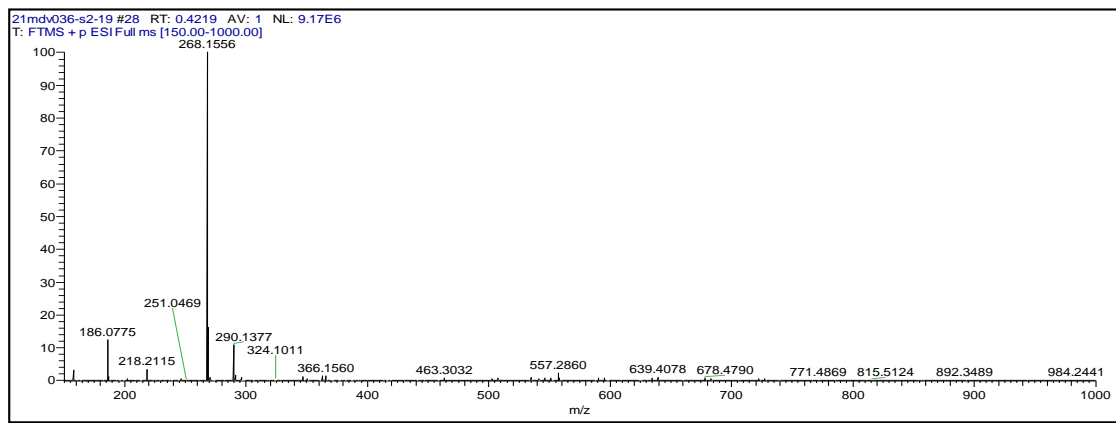

2-(1-(4-chlorobenzyl)-1H-tetrazol-5-yl)-6-methoxy-1H-indole (2t-1)

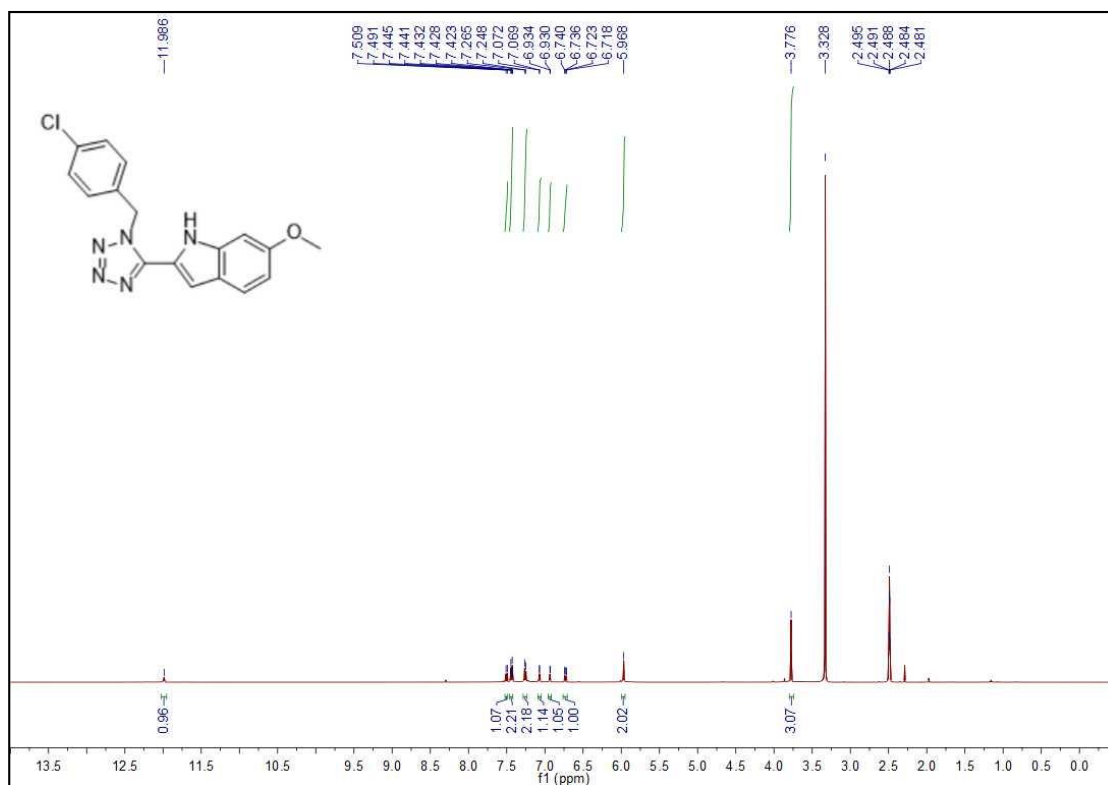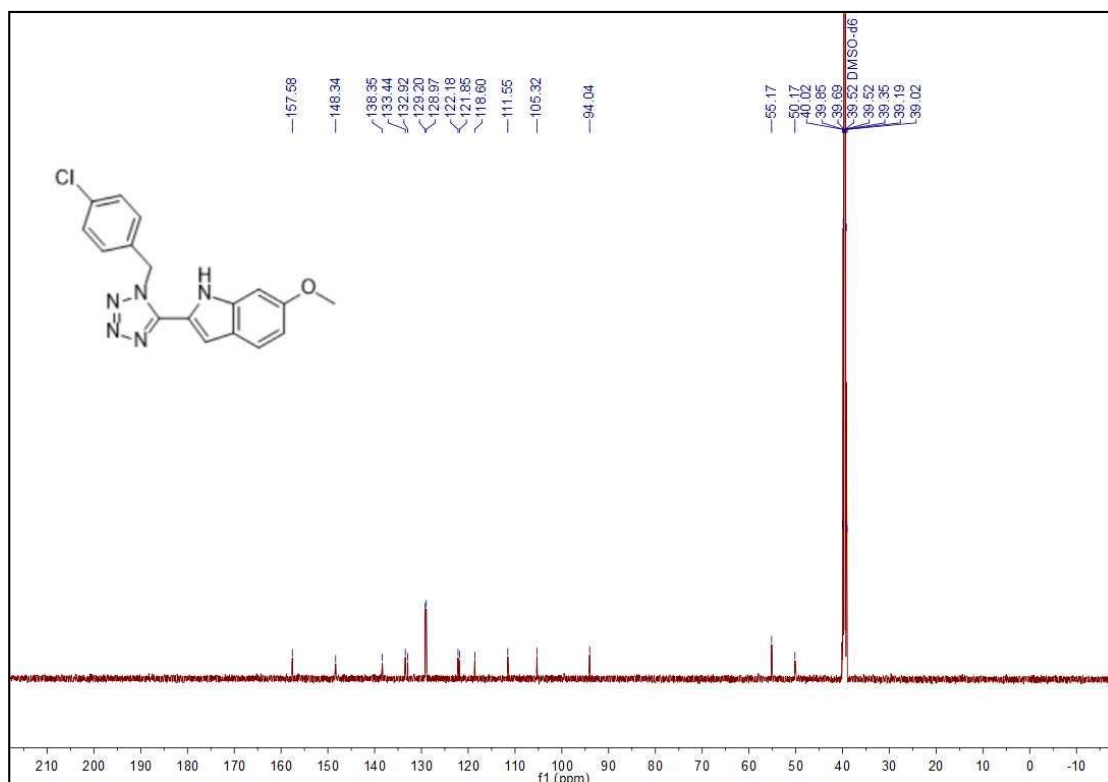

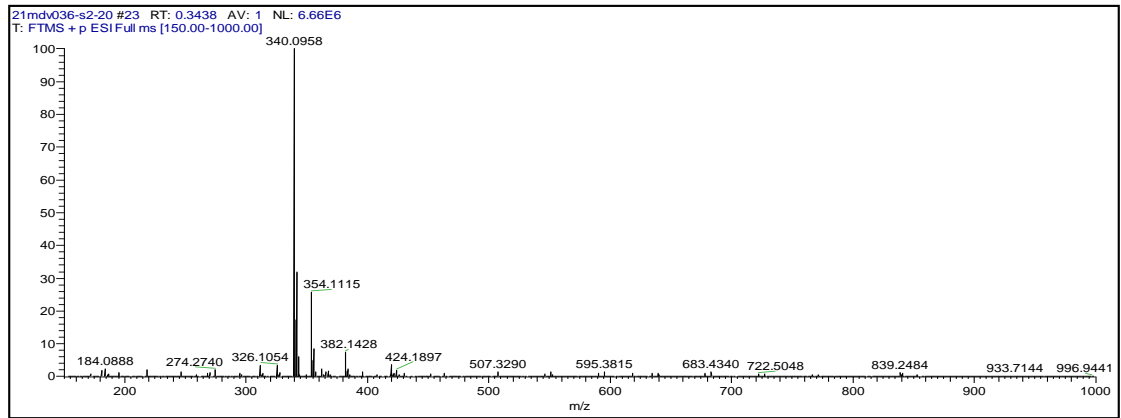

**2-(1-benzyl-1H-tetrazol-5-yl)-6-methyl-1H-indole (2u-1)** and **2-(1-benzyl-1H-tetrazol-5-yl)-4-methyl-1H-indole (2u-2)**

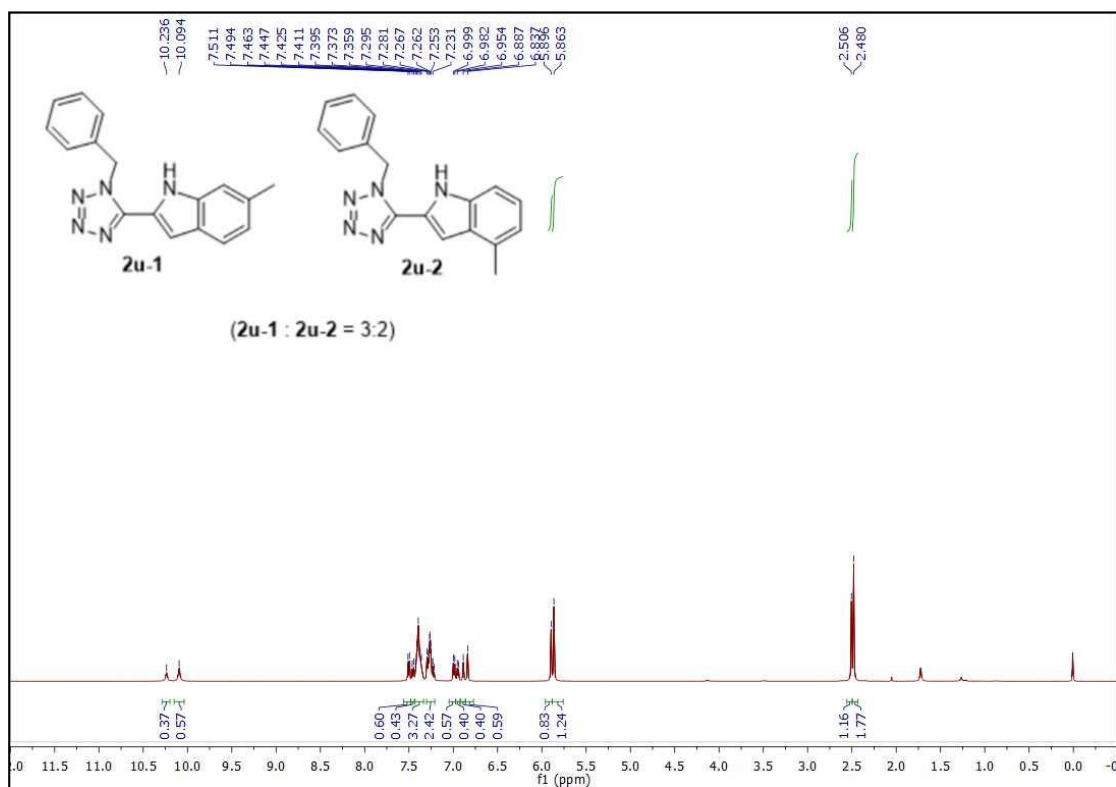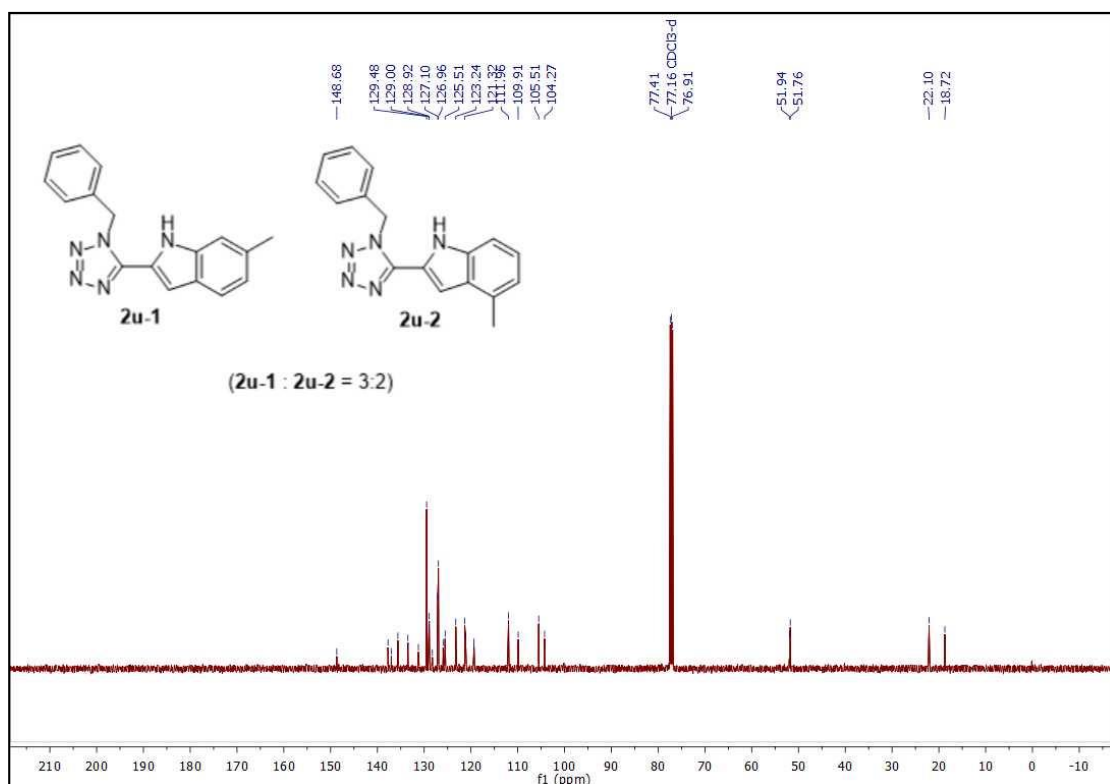



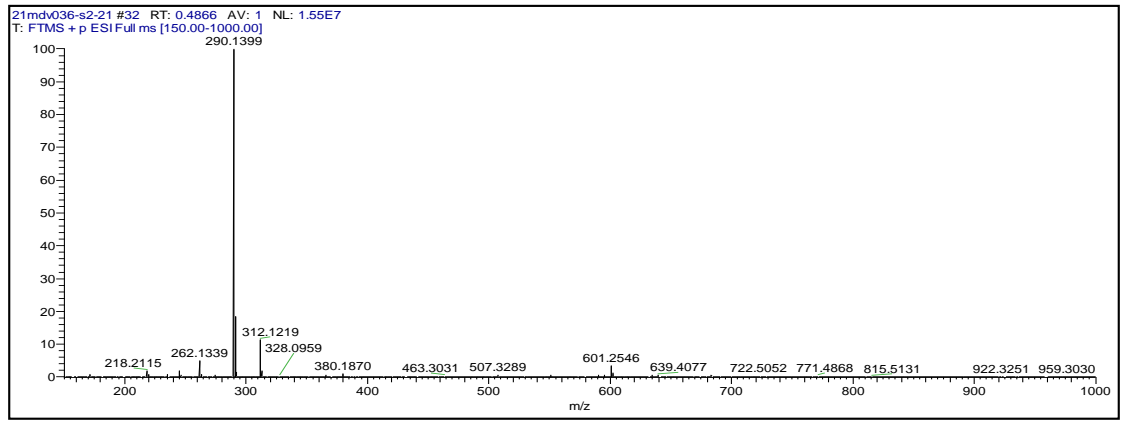

## 2-(1-benzyl-1H-tetrazol-5-yl)-6-fluoro-1H-indole (2v-1)

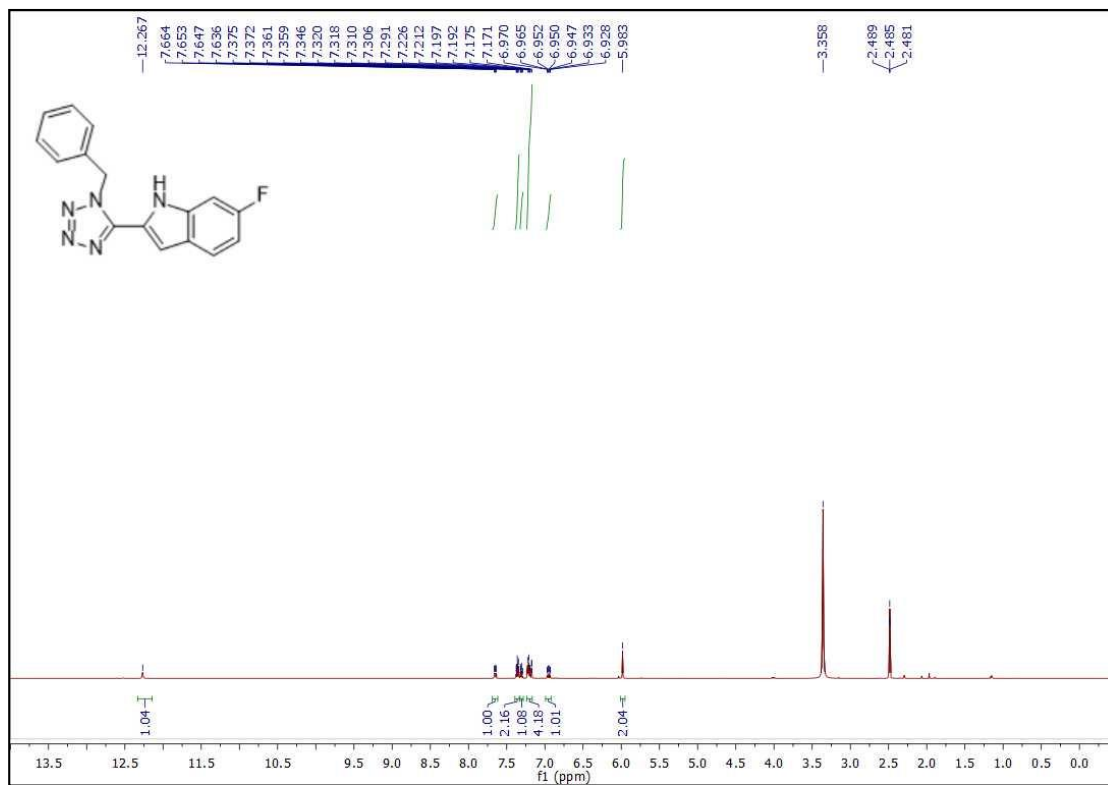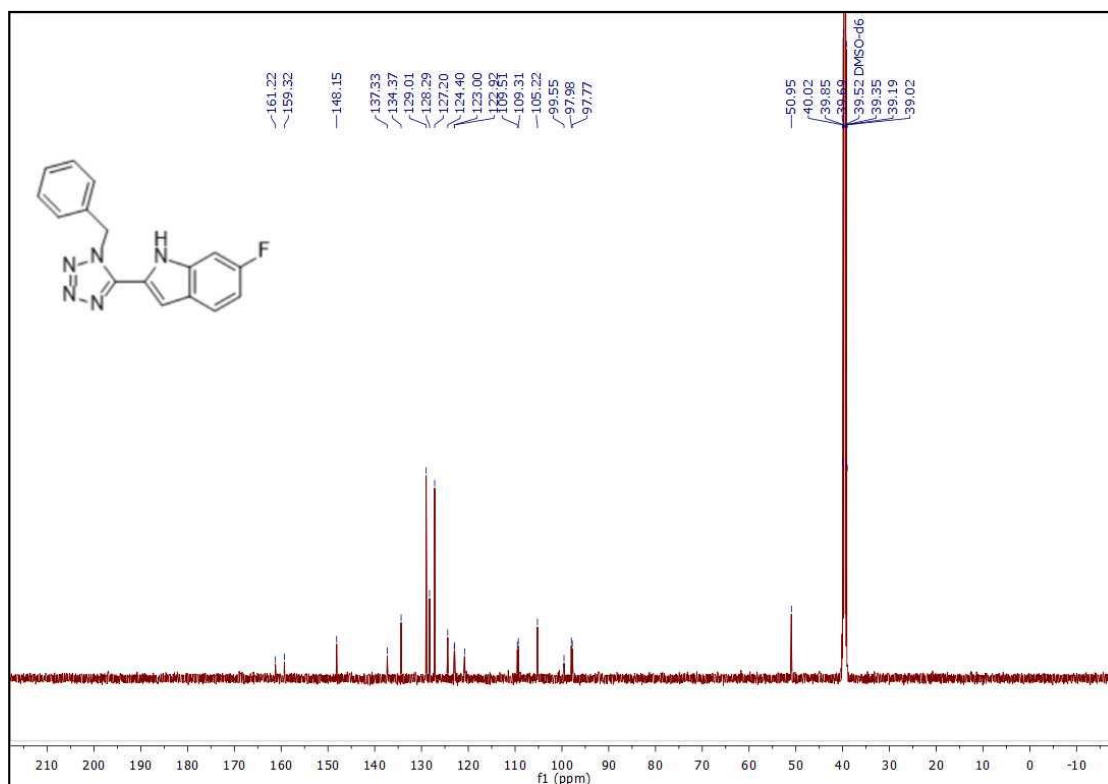

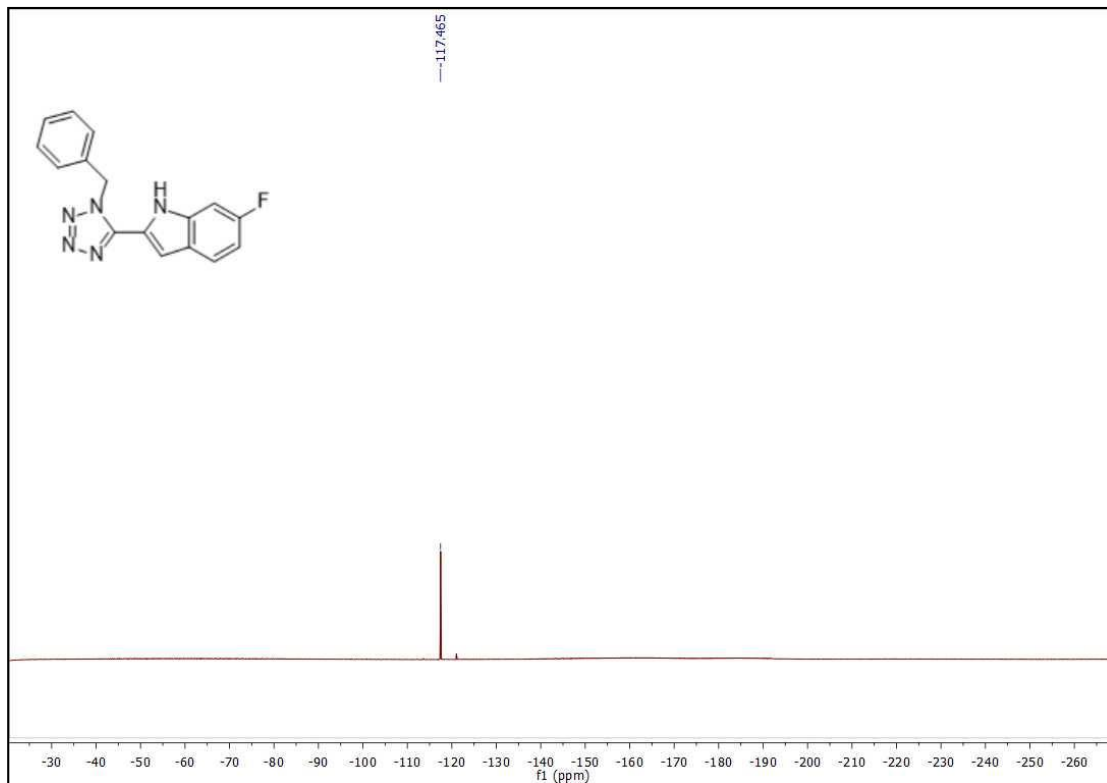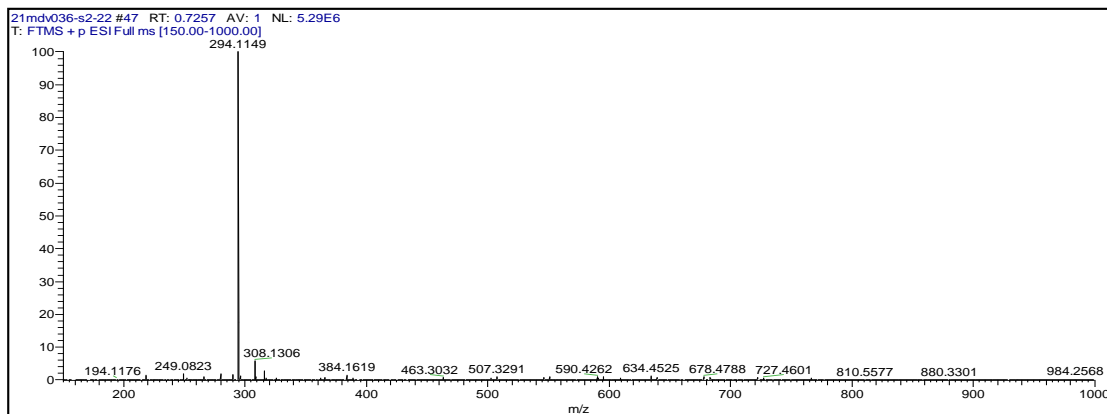

**2-(1-benzyl-1H-tetrazol-5-yl)-6-chloro-1H-indole (2w-1) and 2-(1-benzyl-1H-tetrazol-5-yl)-4-chloro-1H-indole (2w-2)**

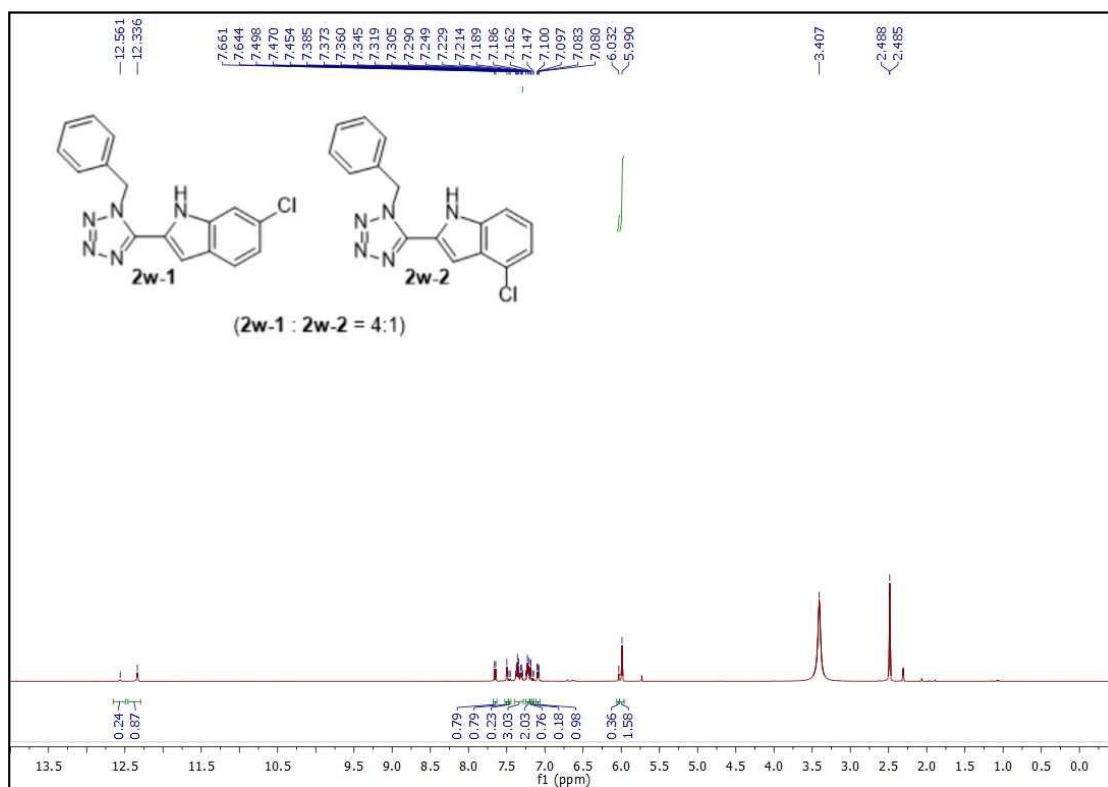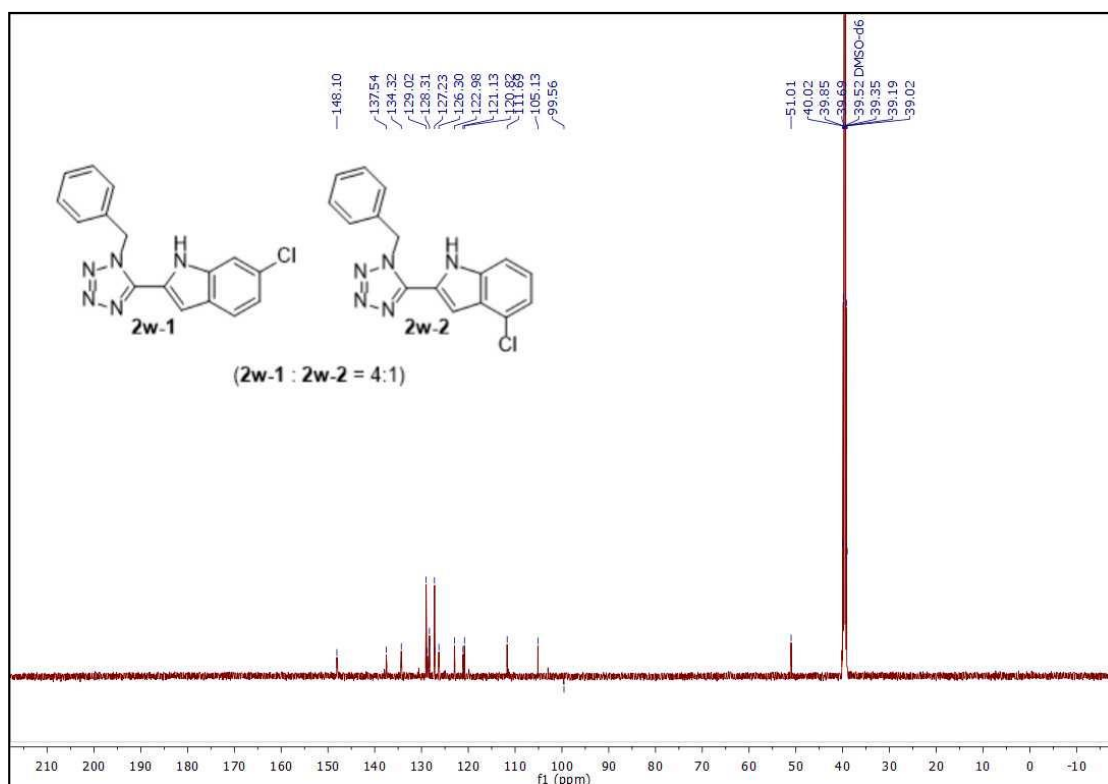

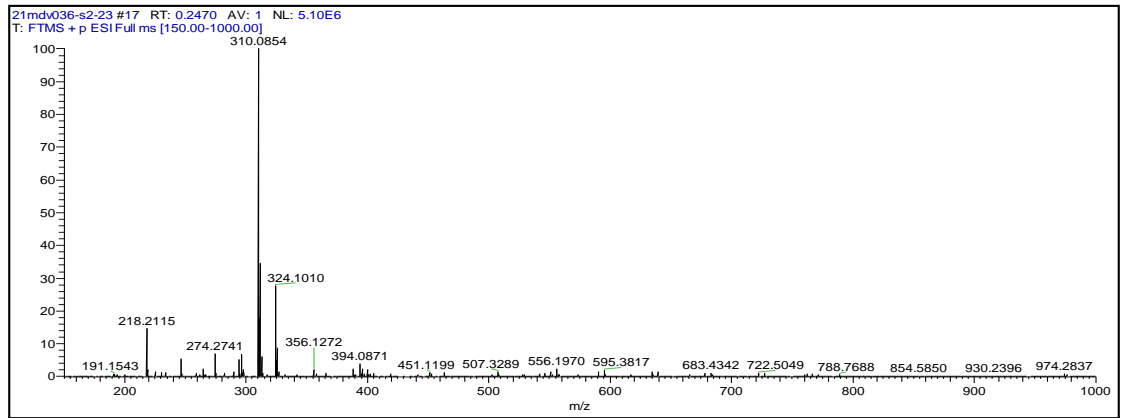

**2-(1-benzyl-1H-tetrazol-5-yl)-6-bromo-1H-indole (2x-1) and 2-(1-benzyl-1H-tetrazol-5-yl)-4-bromo-1H-indole (2x-2)**

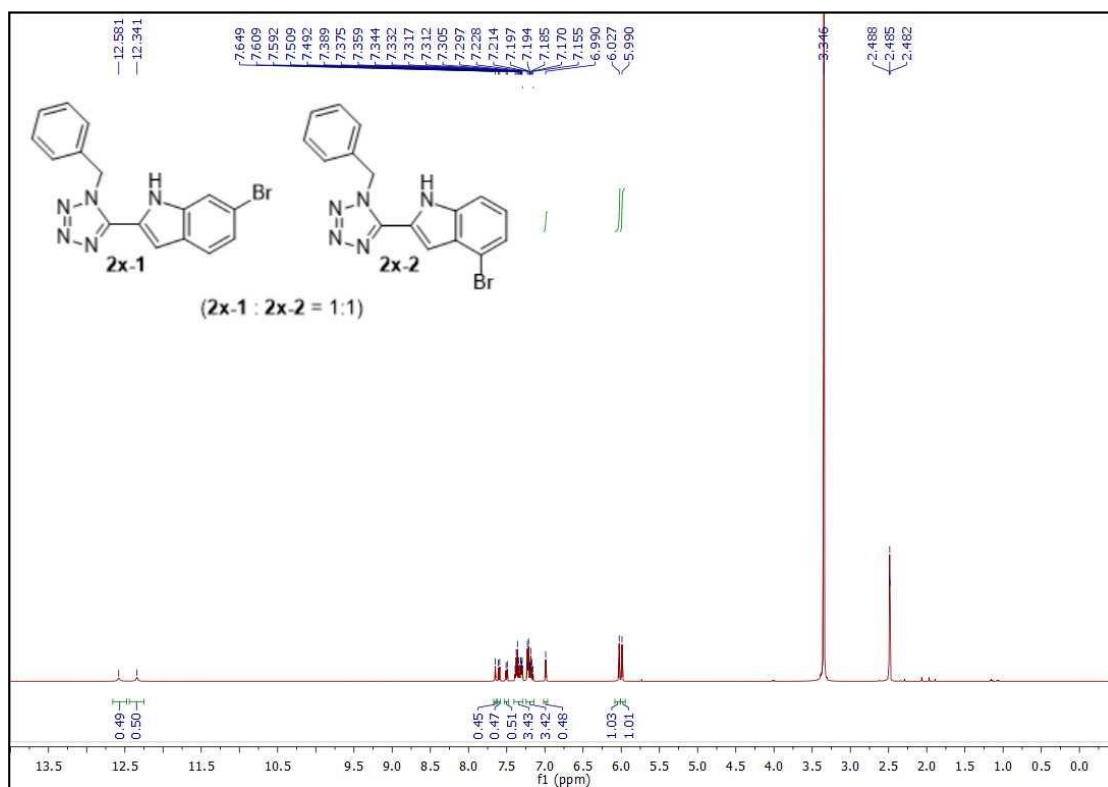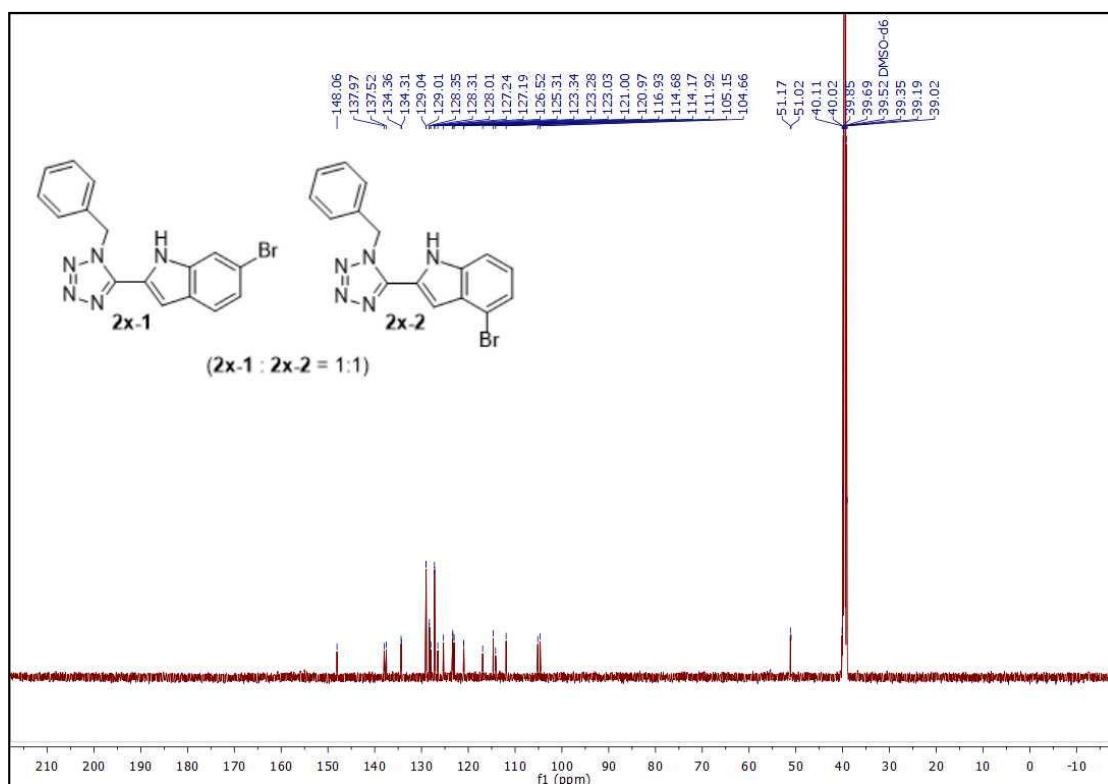

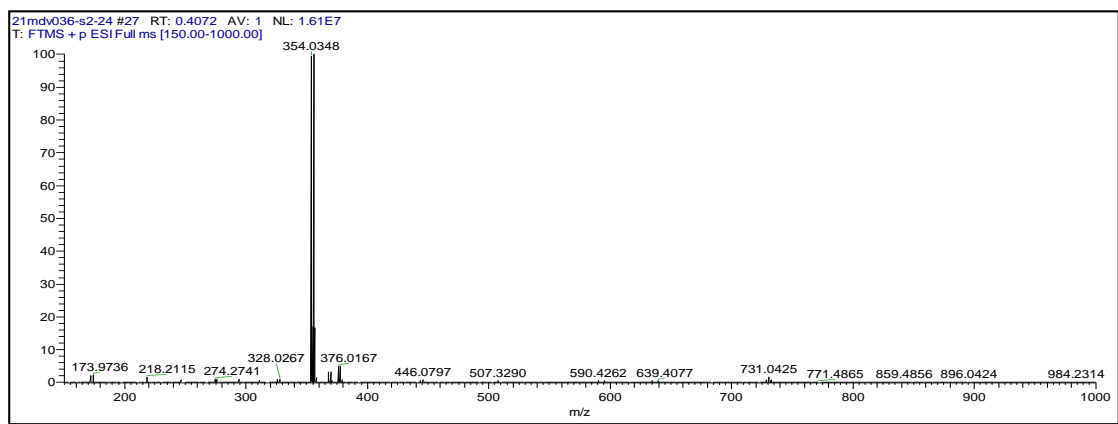

## 2-(1-benzyl-1H-tetrazol-5-yl)-6-isopropyl-1H-indole (2y)

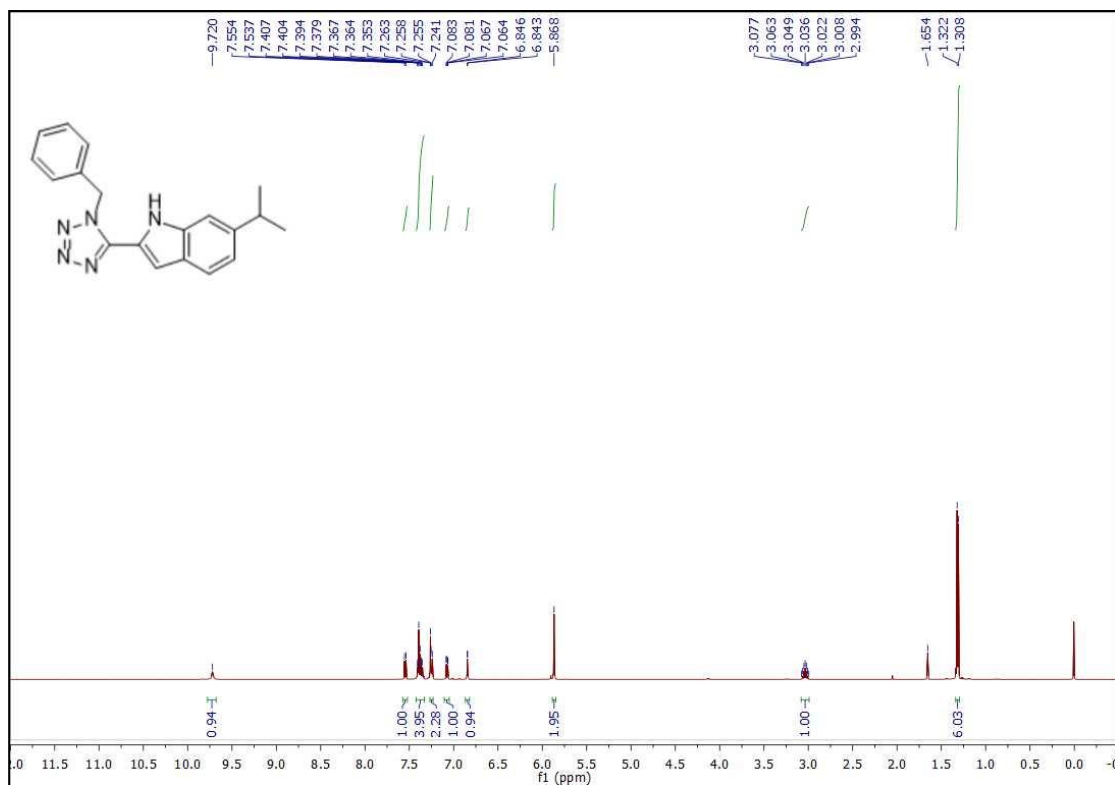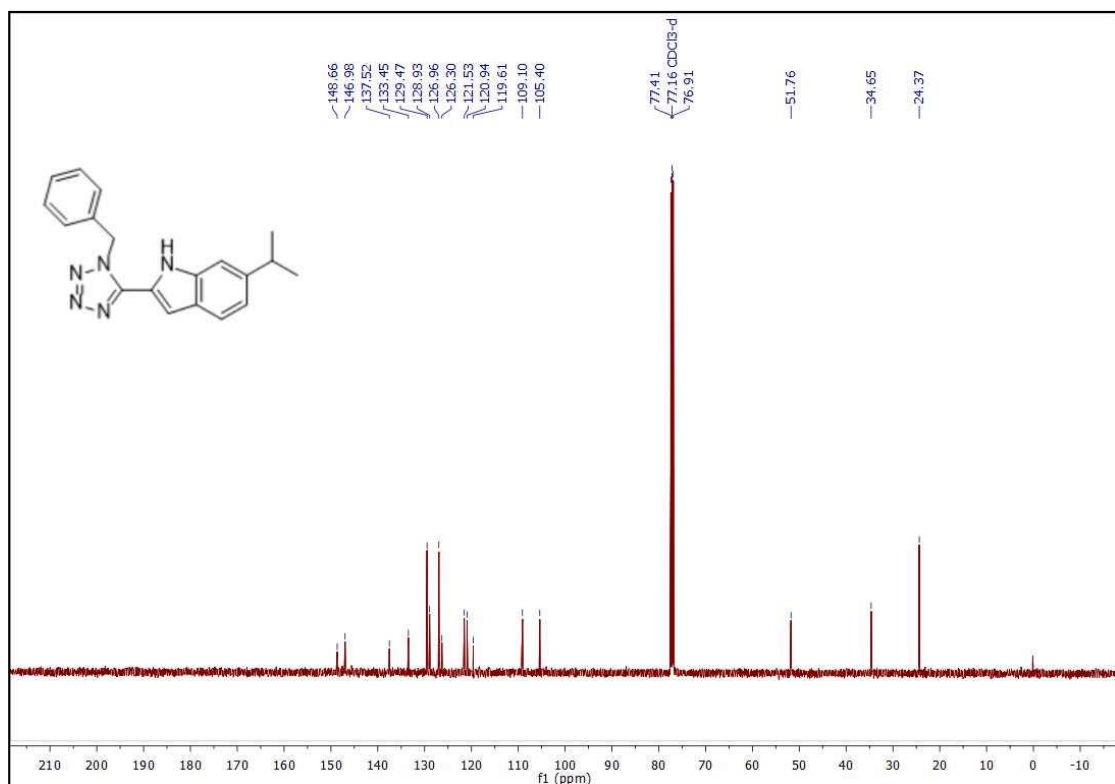



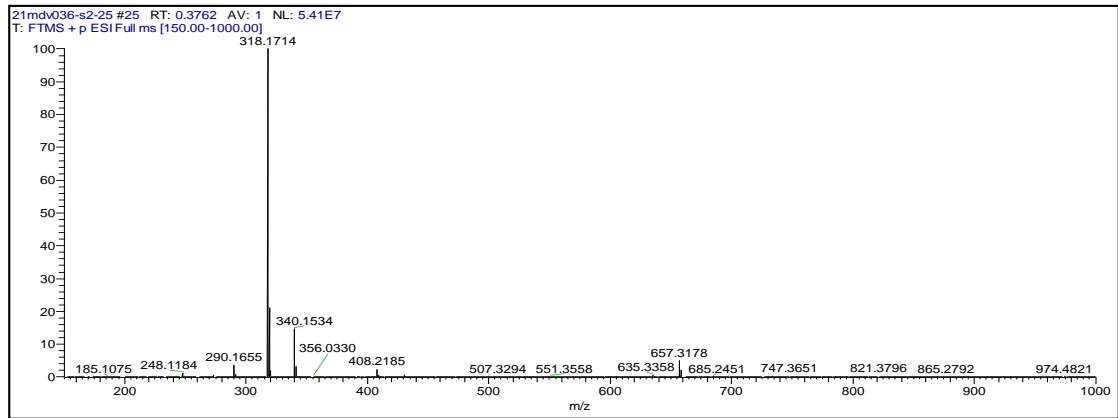

## 2-(1H-tetrazol-5-yl)-1H-indole (3a)

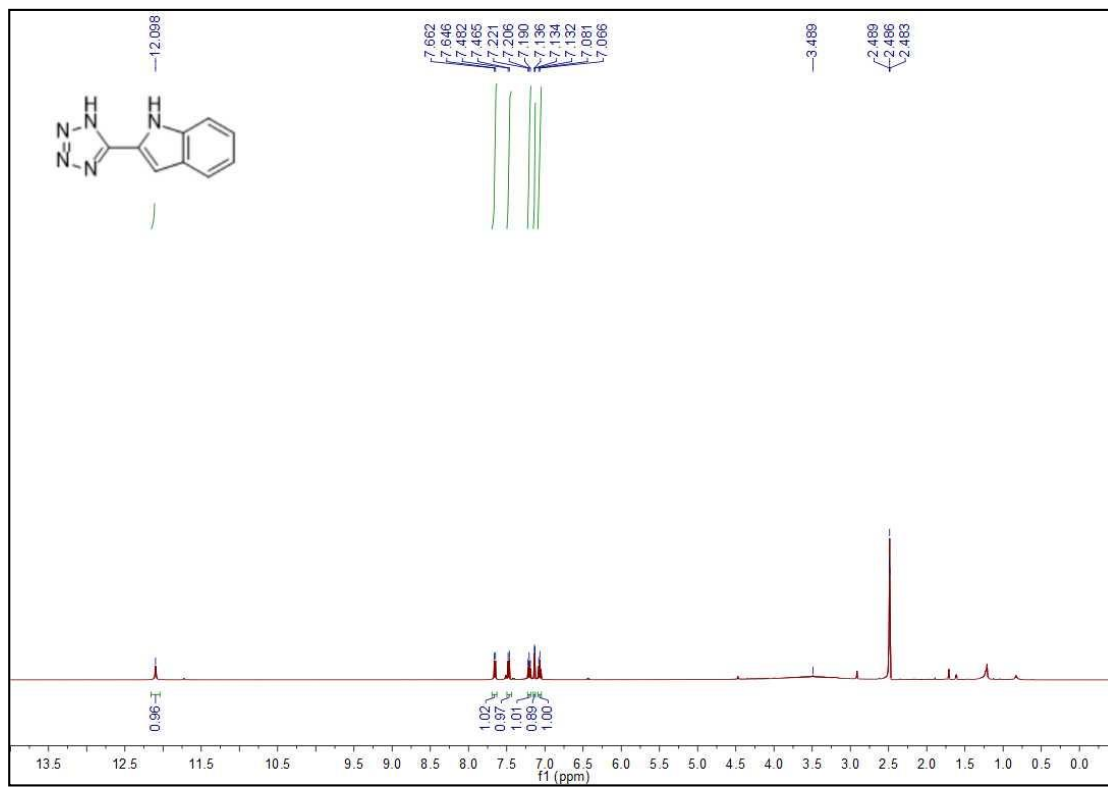

# 6-isopropyl-2-(1H-tetrazol-5-yl)-1H-indole (3b)

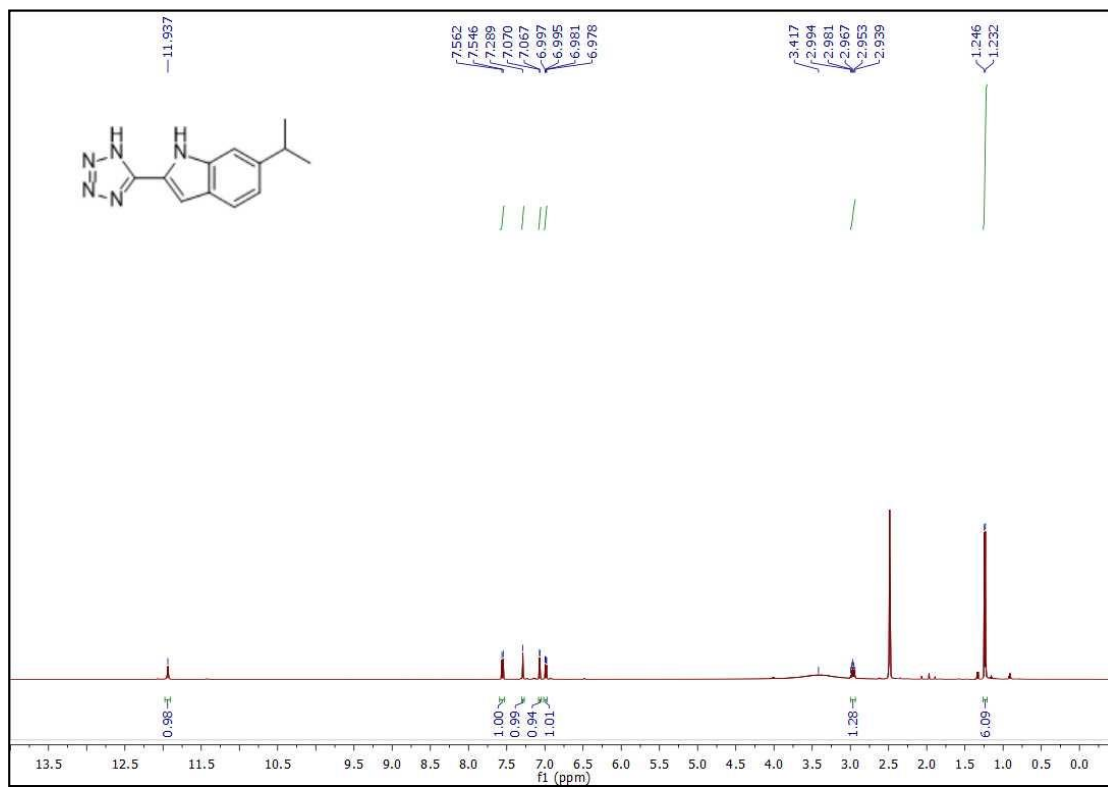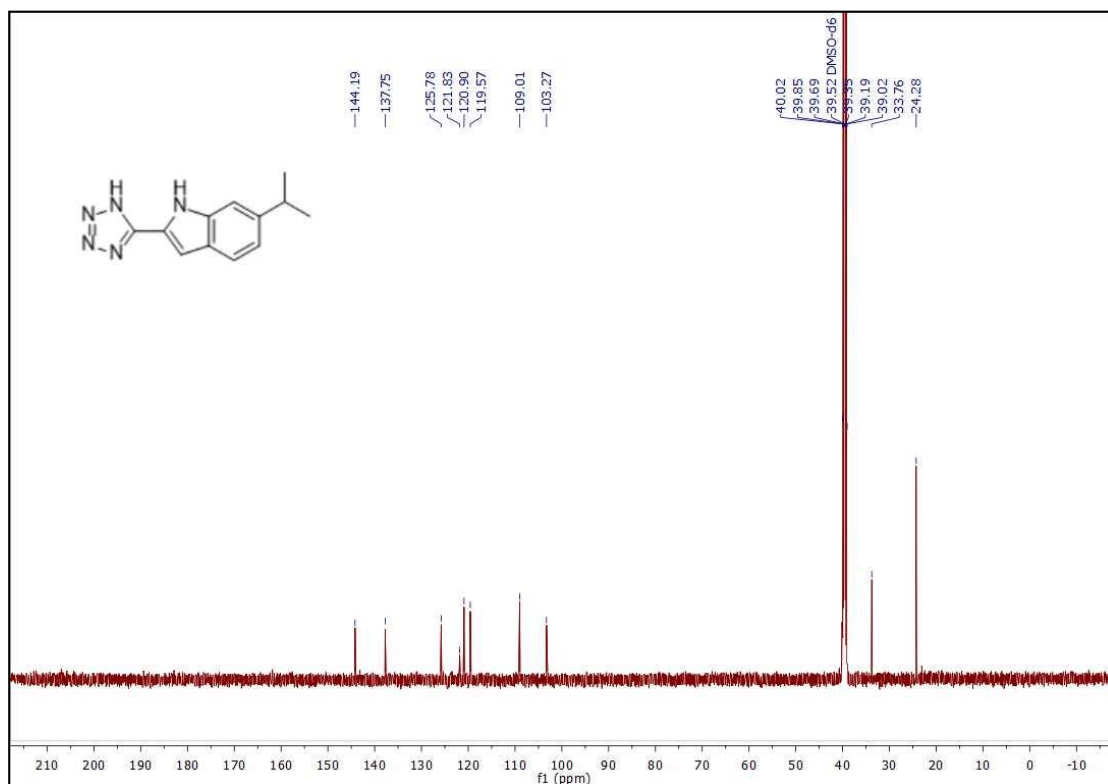

**2-(1-benzyl-1*H*-tetrazol-5-yl)-4,5,6-trimethoxy-1*H*-indole-7-carbaldehyde (4) and  
2-(1-benzyl-1*H*-tetrazol-5-yl)-4,5,6-trimethoxy-1*H*-indole-3,7-dicarbaldehyde (4')**

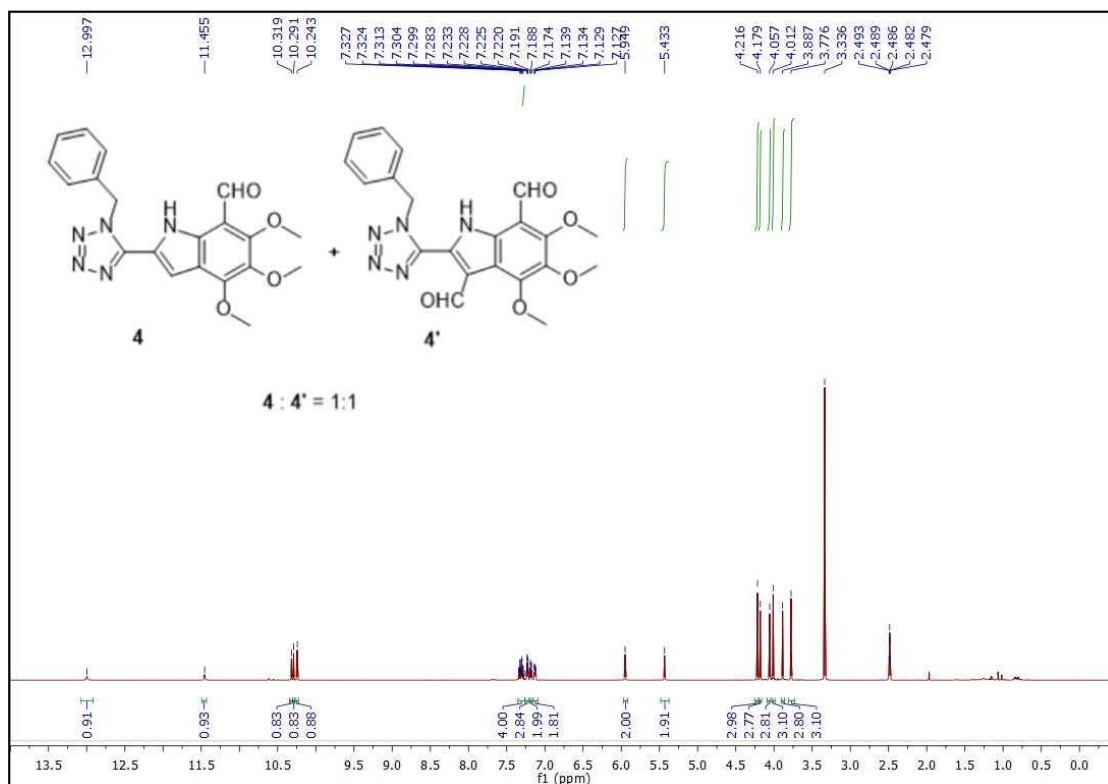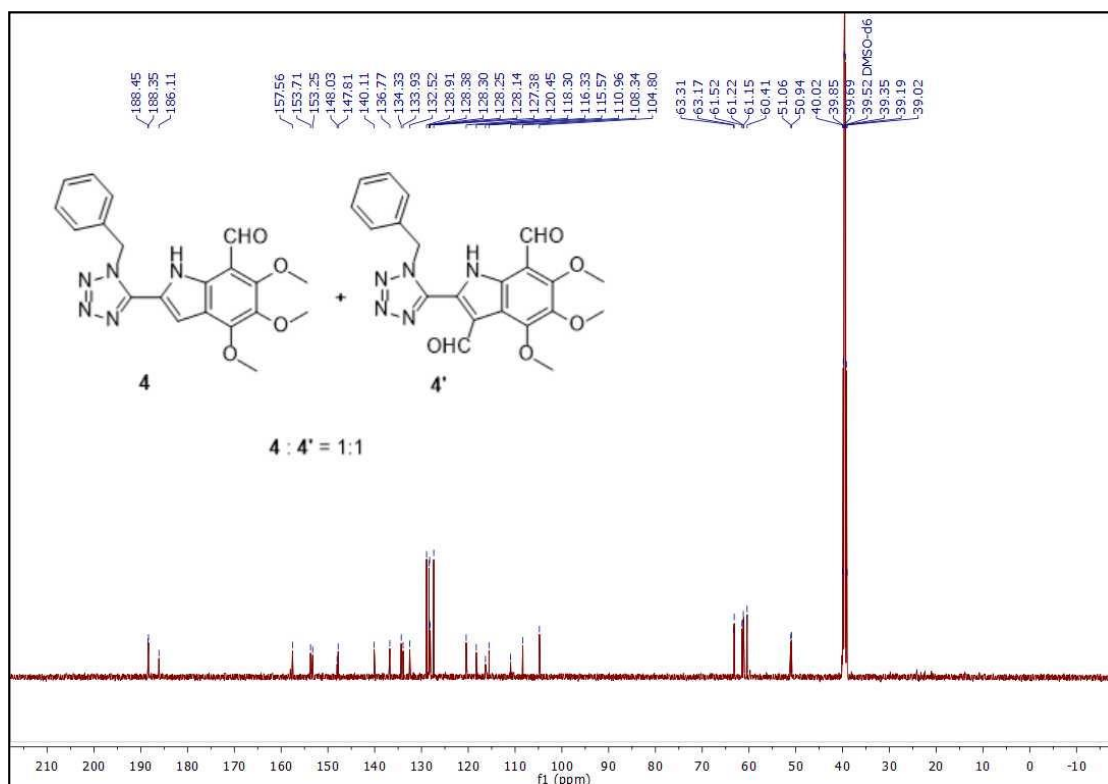

2-(1-benzyl-1H-tetrazol-5-yl)-4,5,6-trimethoxy-1H-indole-7-carbaldehyde (4)

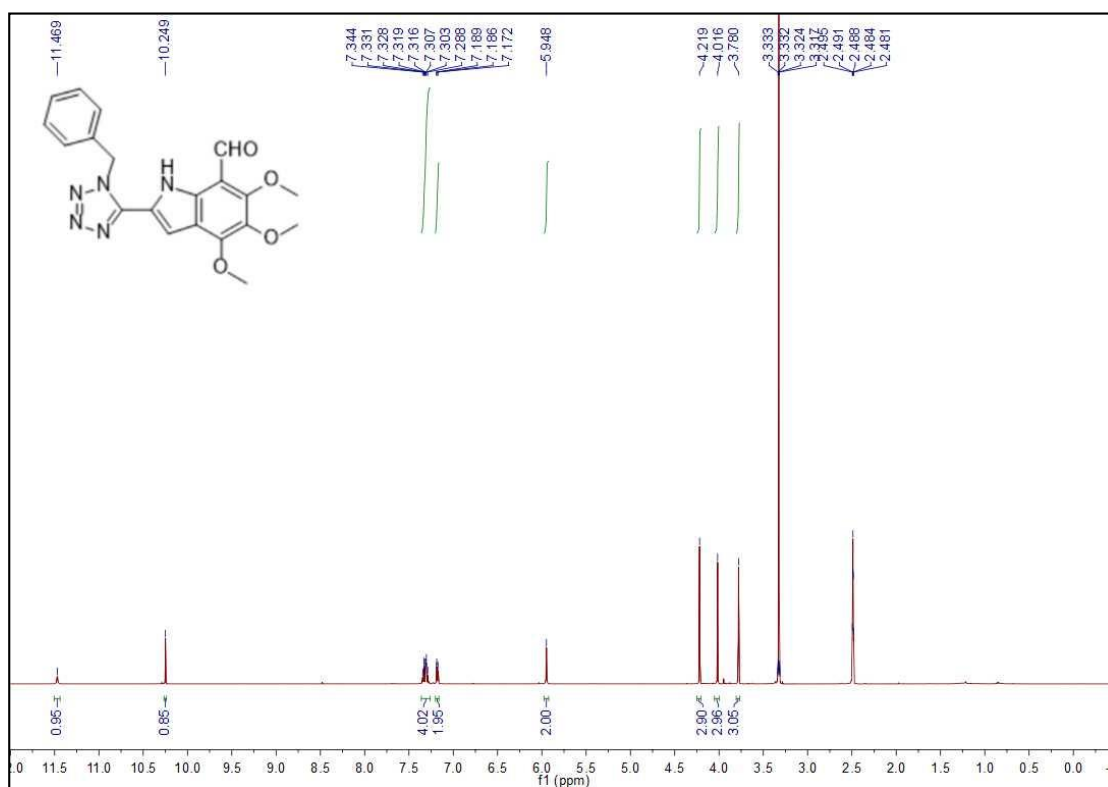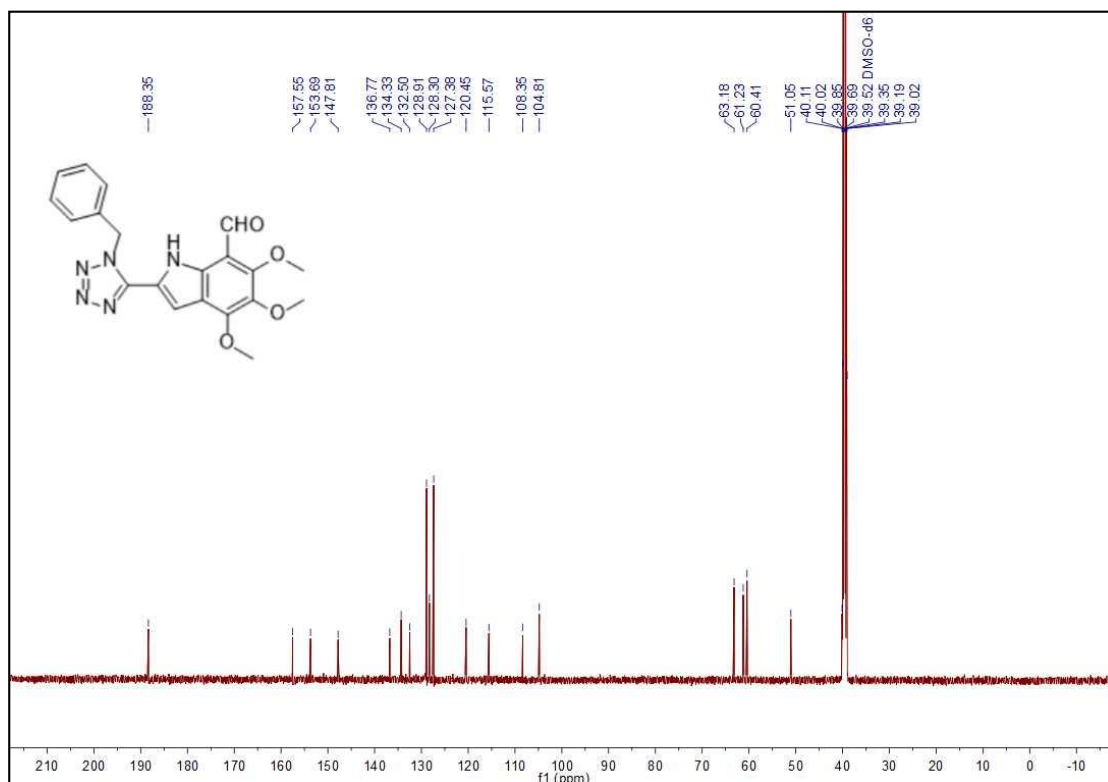

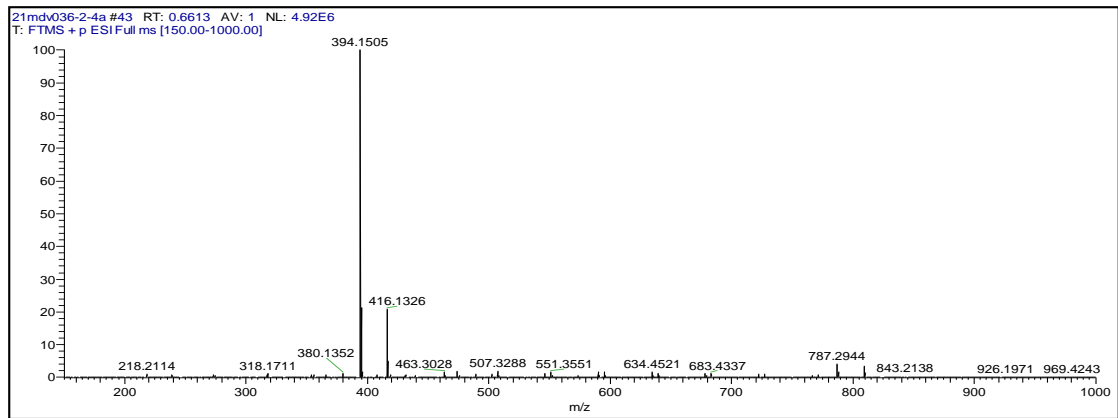

## 2-(1-benzyl-1H-tetrazol-5-yl)-1H-indole-3-carbaldehyde (5)

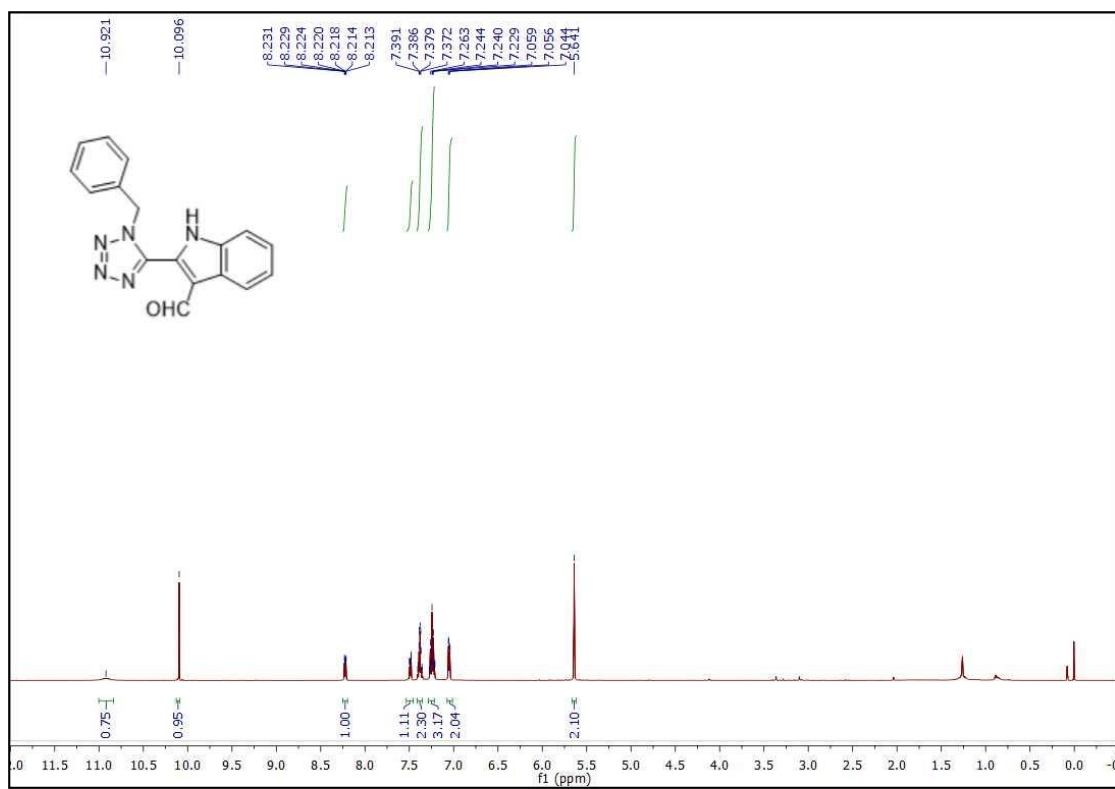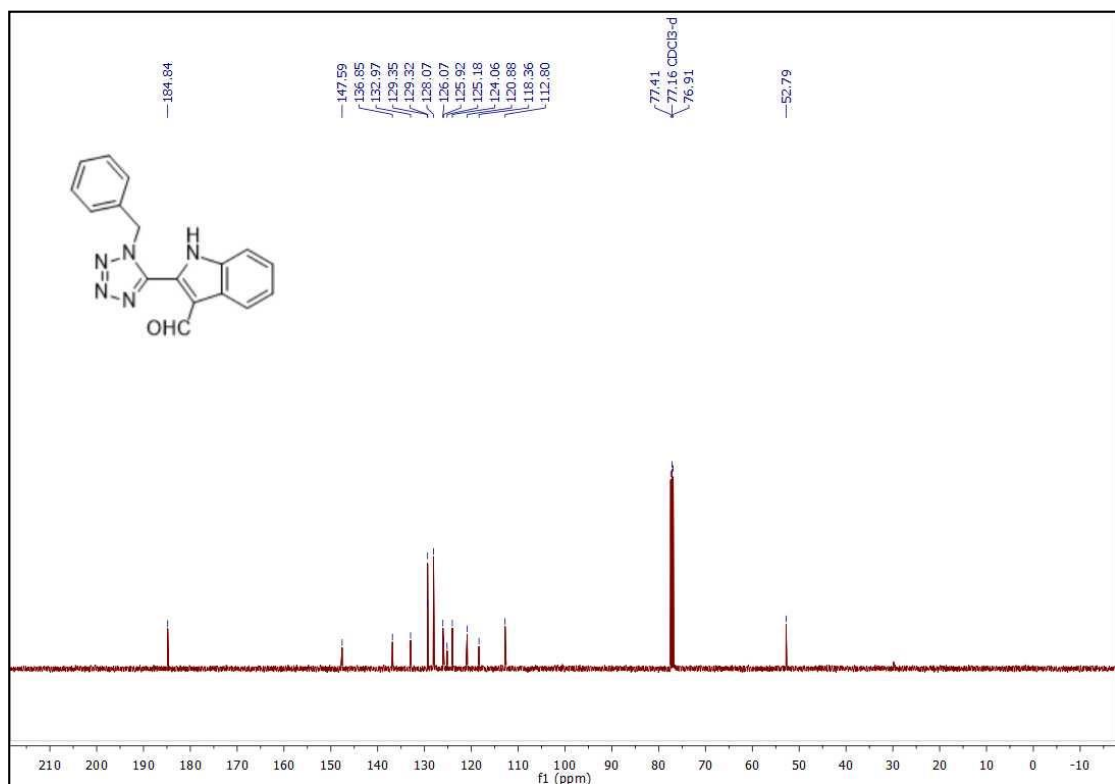

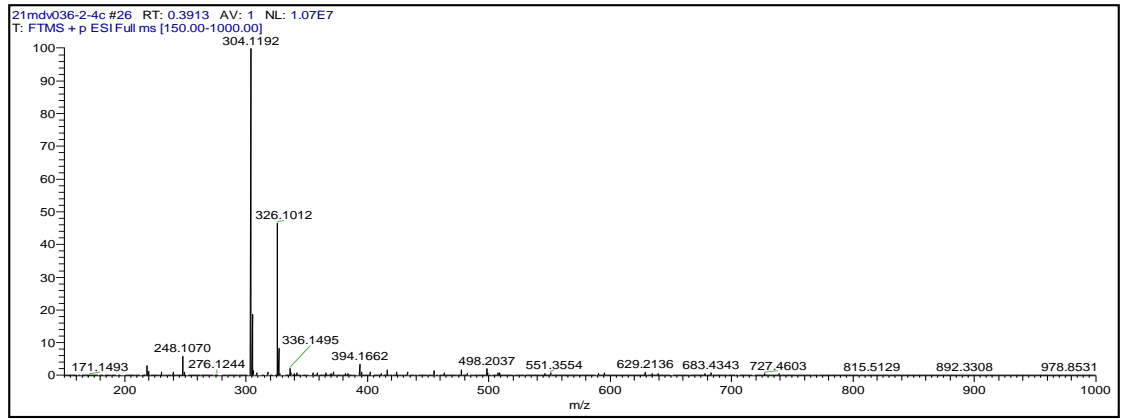



**1-(2-(1-benzyl-1H-tetrazol-5-yl)-4,5,6-trimethoxy-1H-indol-7-yl)-1-(1-(4-chlorobenzyl)-1H-tetrazol-5-yl)-N-(2-methylbenzyl)methanamine (6)**

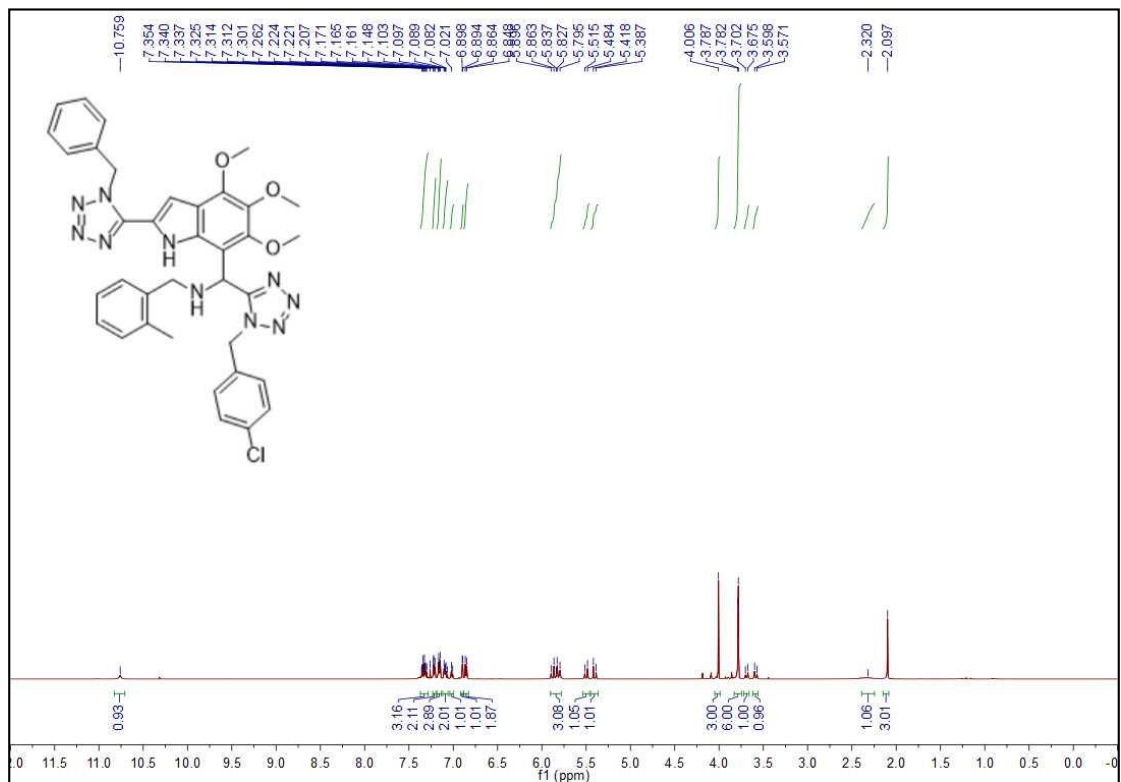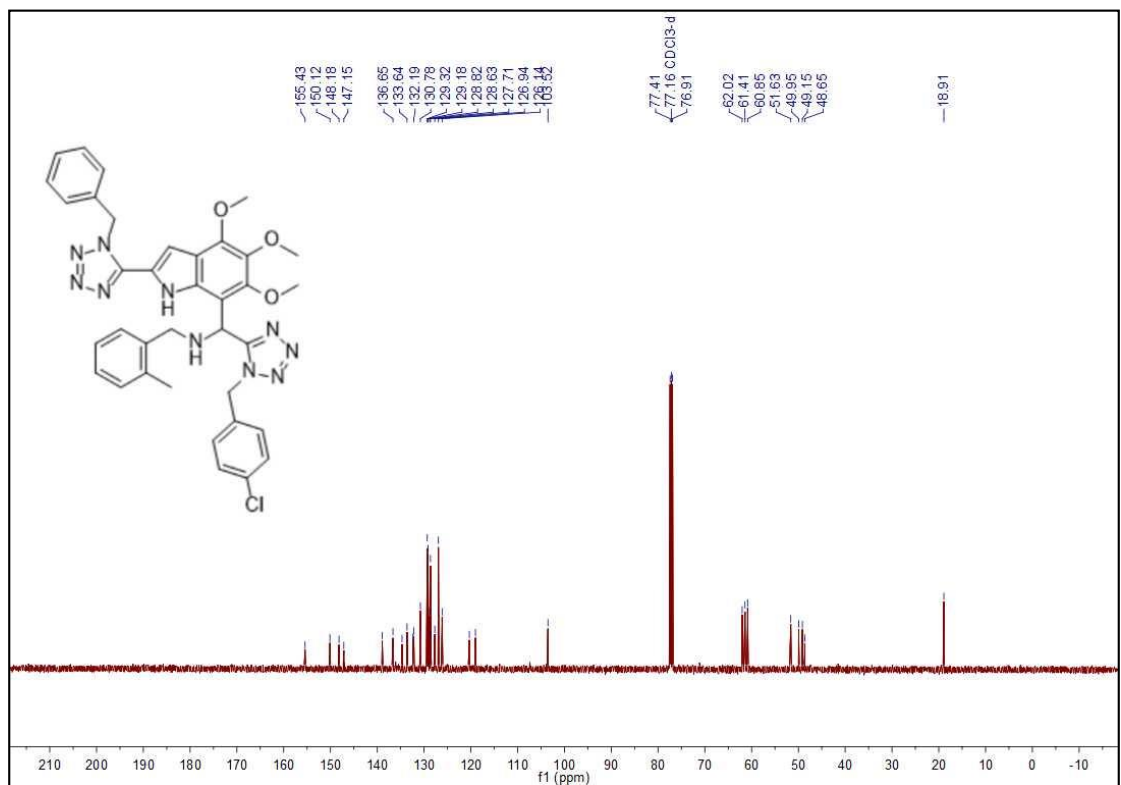

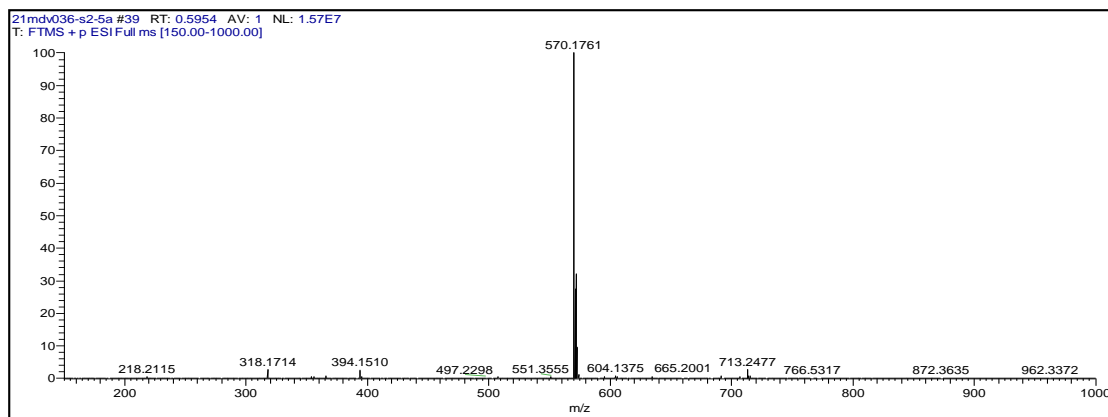

**2-(2-(1-benzyl-1H-tetrazol-5-yl)-4,5,6-trimethoxy-1H-indol-7-yl)-N-(4-chlorobenzyl)-2-(N-(3,5-difluorobenzyl)acetamido)acetamide (7)**

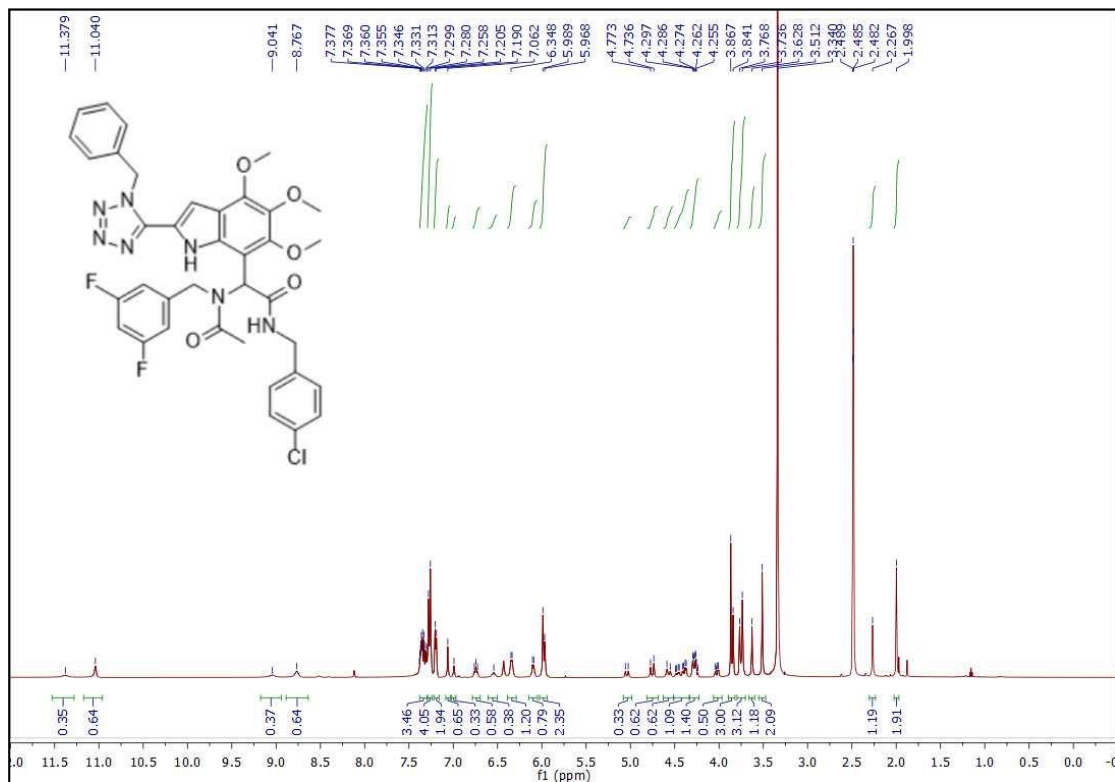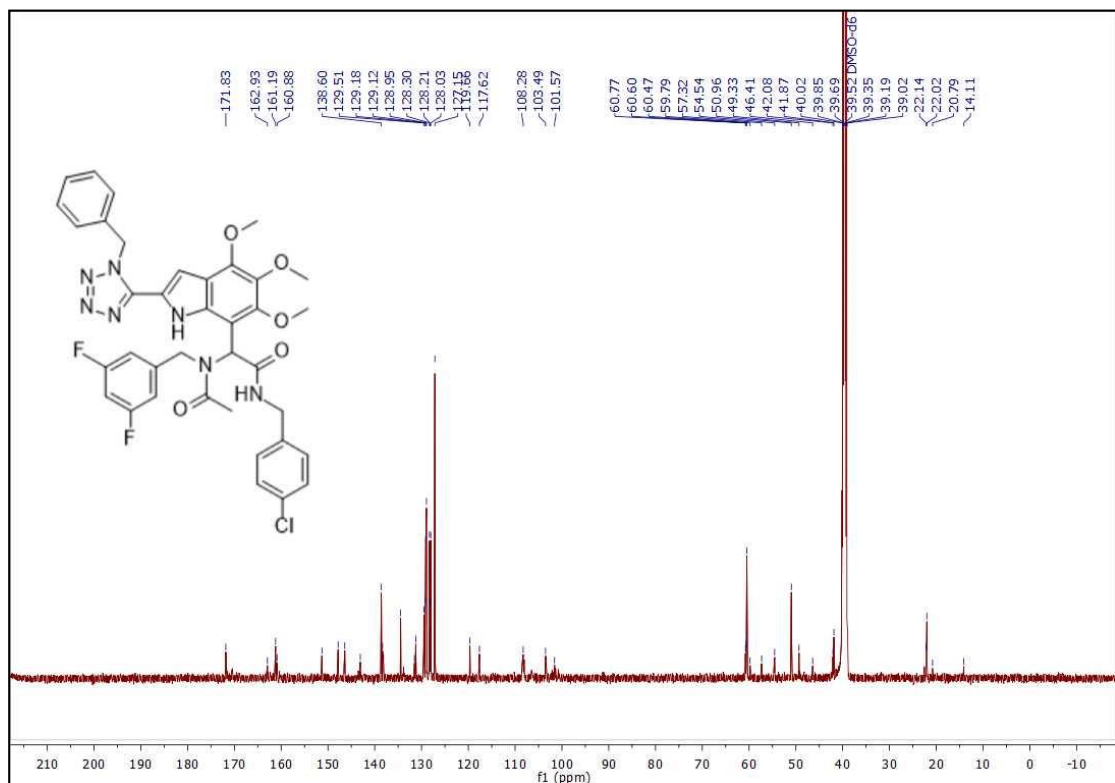

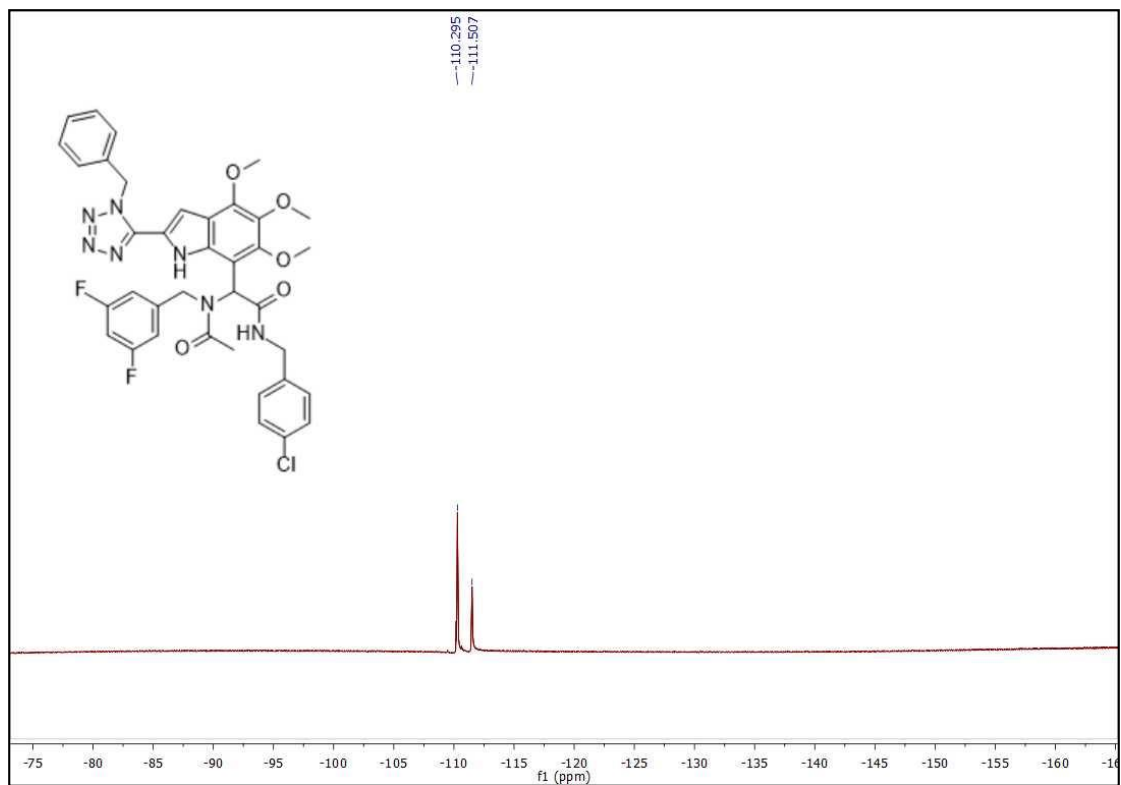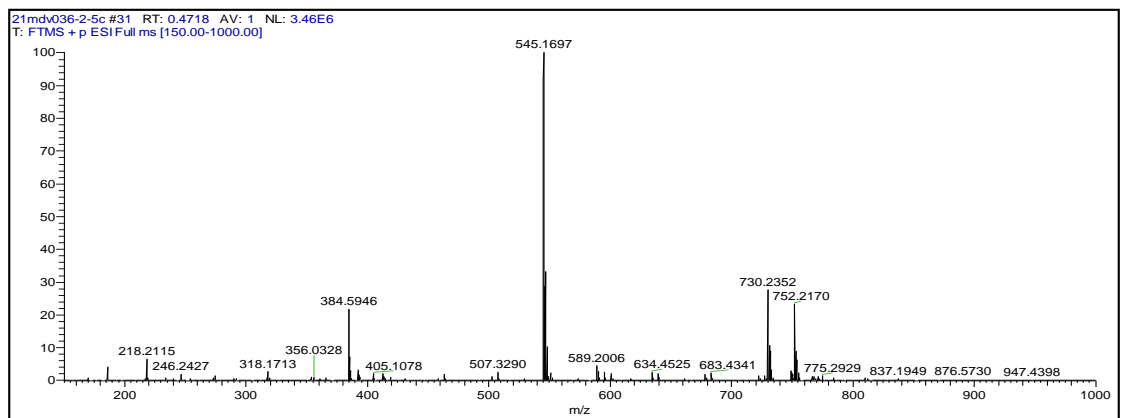

**1-(2-(1-benzyl-1H-tetrazol-5-yl)-1H-indol-3-yl)-1-(1-(4-chlorobenzyl)-1H-tetrazol-5-yl)-N-(2-methylbenzyl)methanamine (8)**

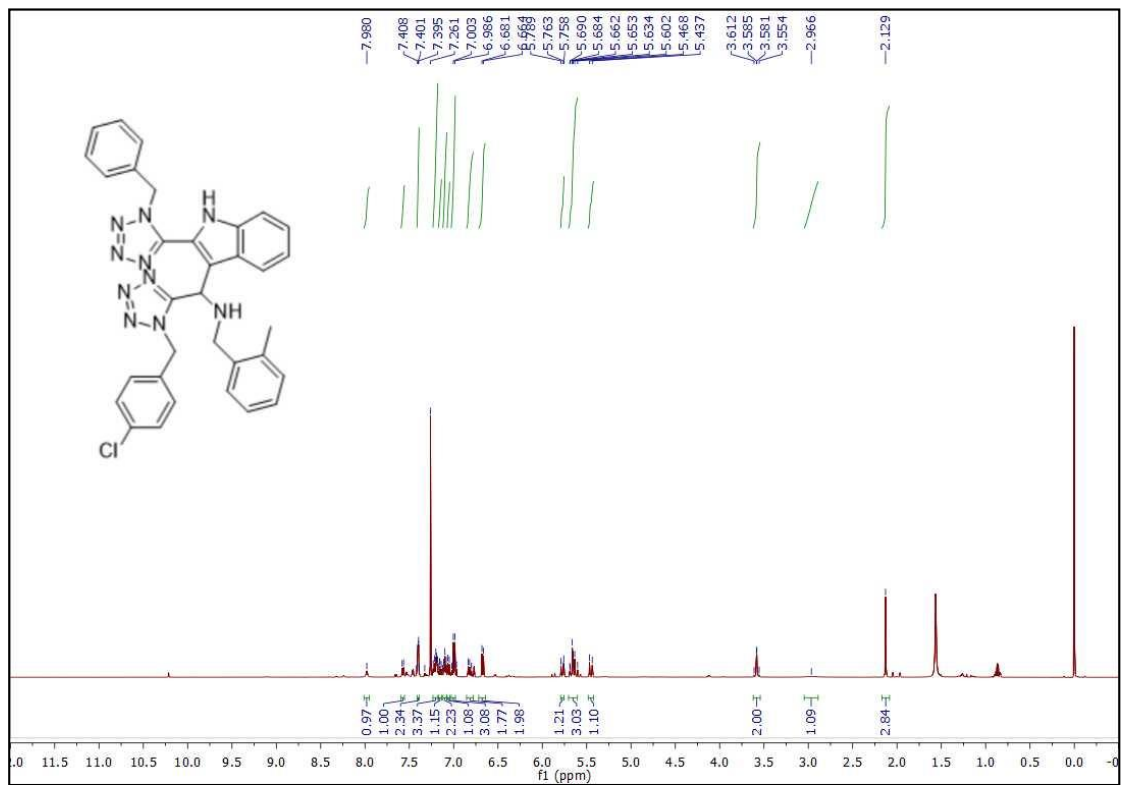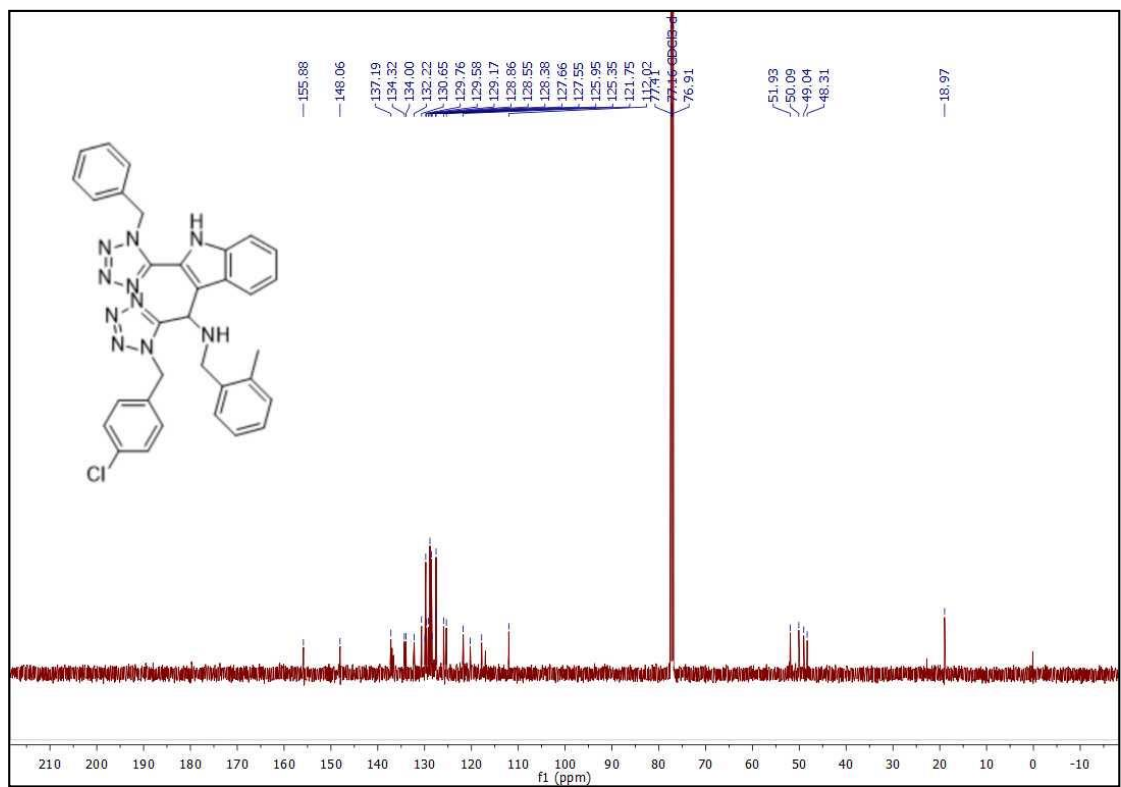

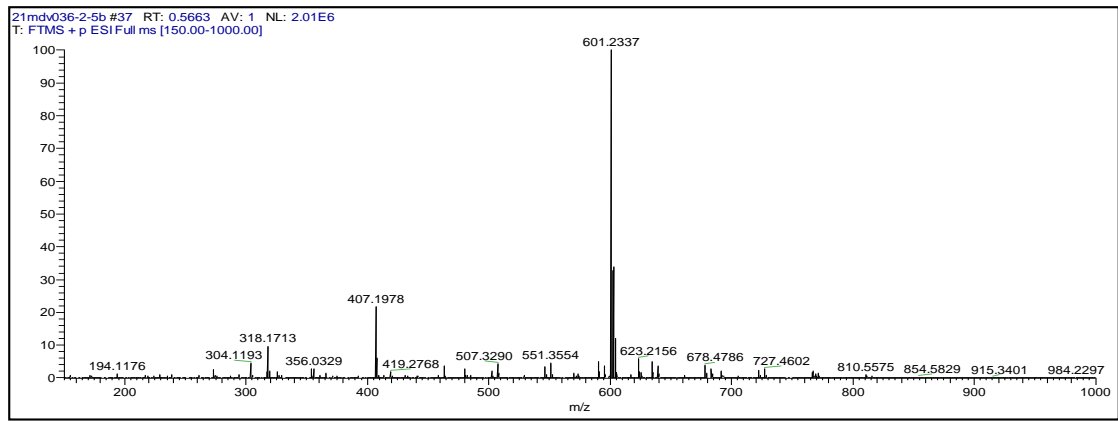

## 4. Single crystal x-ray structure determination

### Data for compound 4

A specimen of  $C_{20}H_{21}N_5O_4$  was used for the X-ray crystallographic analysis. The X-ray intensity data were measured ( $\lambda = 1.54178 \text{ \AA}$ ). A total of 1692 frames were collected. The total exposure time was 2.35 hours. The frames were integrated with the Bruker SAINT software package using a narrow-frame algorithm. The integration of the data using a monoclinic unit cell yielded a total of 10266 reflections to a maximum  $\theta$  angle of  $50.51^\circ$  ( $1.00 \text{ \AA}$  resolution), of which 1965 were independent (average redundancy 5.224, completeness = 99.6%,  $R_{\text{int}} = 4.96\%$ ,  $R_{\text{sig}} = 3.84\%$ ) and 1606 (81.73%) were greater than  $2\sigma(F^2)$ . The final cell constants of  $a = 9.5268(3) \text{ \AA}$ ,  $b = 25.0880(8) \text{ \AA}$ ,  $c = 8.4177(3) \text{ \AA}$ ,  $\beta = 111.280(2)^\circ$ , volume =  $1874.73(11) \text{ \AA}^3$ , are based upon the refinement of the XYZ-centroids of 5363 reflections above  $20 \sigma(I)$  with  $7.047^\circ < 2\theta < 100.7^\circ$ . Data were corrected for absorption effects using the Multi-Scan method (SADABS). The ratio of minimum to maximum apparent transmission was 0.808.

The structure was solved and refined using the Bruker SHELXTL Software Package, using the space group P 1 21/c 1, with  $Z = 4$  for the formula unit,  $C_{20}H_{21}N_5O_4$ . The final anisotropic full-matrix least-squares refinement on  $F^2$  with 269 variables converged at  $R1 = 6.56\%$ , for the observed data and  $wR2 = 19.34\%$  for all data. The goodness-of-fit was 1.435. The largest peak in the final difference electron density synthesis was  $0.212 \text{ e}^-/\text{\AA}^3$  and the largest hole was  $-0.435 \text{ e}^-/\text{\AA}^3$  with an RMS deviation of  $0.058 \text{ e}^-/\text{\AA}^3$ . On the basis of the final model, the calculated density was  $1.401 \text{ g/cm}^3$  and  $F(000)$ , 832  $e^-$ . CCDC number: 2077271

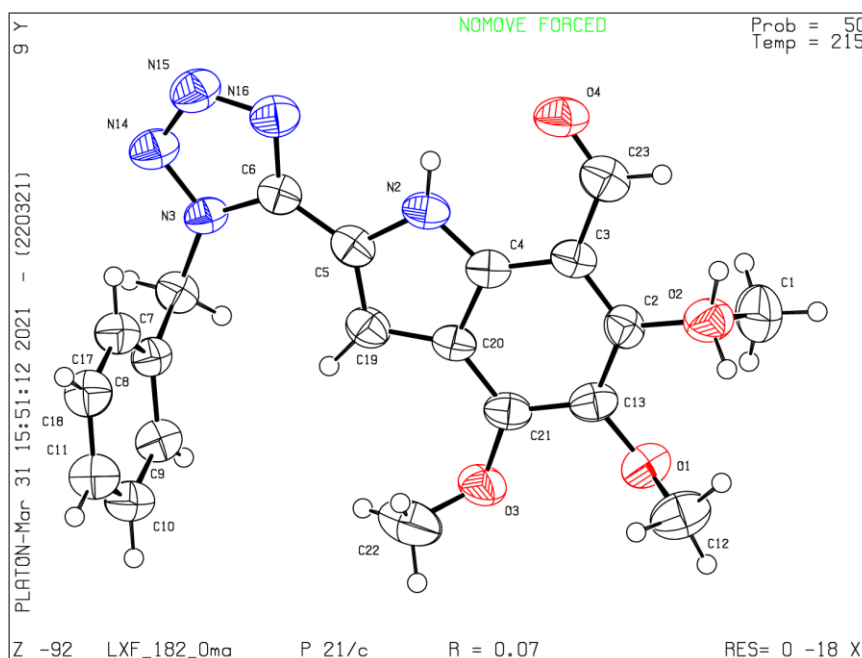

**Table 1.** Sample and crystal data for **4**

|                               |                                                               |                 |
|-------------------------------|---------------------------------------------------------------|-----------------|
| <b>Identification code</b>    | 4 (LXF_182)                                                   |                 |
| <b>Chemical formula</b>       | C <sub>20</sub> H <sub>21</sub> N <sub>5</sub> O <sub>4</sub> |                 |
| <b>Formula weight</b>         | 395.42 g/mol                                                  |                 |
| <b>Temperature</b>            | 215(2) K                                                      |                 |
| <b>Wavelength</b>             | 1.54178 Å                                                     |                 |
| <b>Crystal system</b>         | monoclinic                                                    |                 |
| <b>Space group</b>            | P 1 21/c 1                                                    |                 |
| <b>Unit cell dimensions</b>   | a = 9.5268(3) Å                                               | α = 90°         |
|                               | b = 25.0880(8) Å                                              | β = 111.280(2)° |
|                               | c = 8.4177(3) Å                                               | γ = 90°         |
| <b>Volume</b>                 | 1874.73(11) Å <sup>3</sup>                                    |                 |
| <b>Z</b>                      | 4                                                             |                 |
| <b>Density (calculated)</b>   | 1.401 g/cm <sup>3</sup>                                       |                 |
| <b>Absorption coefficient</b> | 0.831 mm <sup>-1</sup>                                        |                 |
| <b>F(000)</b>                 | 832                                                           |                 |

**Table 2.** Data collection and structure refinement for **4**

|                                            |                                                                                                                                                       |                           |
|--------------------------------------------|-------------------------------------------------------------------------------------------------------------------------------------------------------|---------------------------|
| <b>Theta range for data collection</b>     | 3.52 to 50.51°                                                                                                                                        |                           |
| <b>Index ranges</b>                        | -9<=h<=9, -24<=k<=25, -8<=l<=8                                                                                                                        |                           |
| <b>Reflections collected</b>               | 10266                                                                                                                                                 |                           |
| <b>Independent reflections</b>             | 1965 [R(int) = 0.0496]                                                                                                                                |                           |
| <b>Coverage of independent reflections</b> | 99.6%                                                                                                                                                 |                           |
| <b>Absorption correction</b>               | Multi-Scan                                                                                                                                            |                           |
| <b>Structure solution technique</b>        | direct methods                                                                                                                                        |                           |
| <b>Structure solution program</b>          | SHELXT 2014/5 (Sheldrick, 2014)                                                                                                                       |                           |
| <b>Refinement method</b>                   | Full-matrix least-squares on F <sup>2</sup>                                                                                                           |                           |
| <b>Refinement program</b>                  | SHELXL-2018/3 (Sheldrick, 2018)                                                                                                                       |                           |
| <b>Function minimized</b>                  | Σ w(F <sub>o</sub> <sup>2</sup> - F <sub>c</sub> <sup>2</sup> ) <sup>2</sup>                                                                          |                           |
| <b>Data / restraints / parameters</b>      | 1965 / 0 / 269                                                                                                                                        |                           |
| <b>Goodness-of-fit on F<sup>2</sup></b>    | 1.435                                                                                                                                                 |                           |
| <b>Δ/σ<sub>max</sub></b>                   | 0.002                                                                                                                                                 |                           |
| <b>Final R indices</b>                     | 1606 data;<br>l>2σ(l)                                                                                                                                 | R1 = 0.0656, wR2 = 0.1793 |
|                                            | all data                                                                                                                                              | R1 = 0.0822, wR2 = 0.1934 |
| <b>Weighting scheme</b>                    | w=1/[σ <sup>2</sup> (F <sub>o</sub> <sup>2</sup> )+(0.1000P) <sup>2</sup> ]<br>where P=(F <sub>o</sub> <sup>2</sup> +2F <sub>c</sub> <sup>2</sup> )/3 |                           |
| <b>Largest diff. peak and hole</b>         | 0.212 and -0.435 eÅ <sup>-3</sup>                                                                                                                     |                           |
| <b>R.M.S. deviation from mean</b>          | 0.058 eÅ <sup>-3</sup>                                                                                                                                |                           |



## References and Notes

1. Patil, P., Ahmadian-Moghaddam, M., & Dömling, A. *Green Chemistry*, **2020**, 22, 6902-6911.
2. Lanke, V., & Ramaiah Prabhu, K. *Organic Letters*, **2015**, 15(24), 6262-6265.
3. Kou, X.; Zhao, M.; Qiao, X.; Zhu, Y.; Tong, X.; Shen, Z. *Chemistry - A European Journal*, **2013**, 19, 16880.
4. Ito, M., Iwatani, M., Kamada, Y., Sogabe, S., Nakao, S., Tanaka, T., Imaeda, Y. *Biorganic & Medicinal Chemistry*, **2017**, 25(7), 2200-2209.
